# Supplementary material for: Targeted induction of a silent fungal gene cluster encoding the bacteria-specific germination inhibitor fumigermin
Source: eLife. 2020 Feb 21;9:e52541. doi: 10.7554/eLife.52541 (PMC7034978; doi:10.7554/eLife.52541)
Supplement: Figure 1—source data 1. [file elife-52541-fig1-data1.xlsx]

## Sheet: 1
Target	Sample	Ct	CT mean							Af293	1020	0			RQ log2										Af293 + Sr	1020	-0.338985		Af293 + Sr	-0.338985	-0.749861	Af293 + Sr 1020				Af293 + Sr 1020		-0.749861
actin			33.878							Af293	1020	-0.874626				Af293 + S.r.		ATCC46645+ S.r.							Af293 + Sr	1020	-0.899704		Af293 + Sr	-0.899704
										Af293	1020	0.211983		1020		-0.52898									Af293 + Sr	1020	-1.01089		Af293 + Sr	-1.01089
										Af293 + Sr	1020	-0.338985		1010		1.45835									ATCC + Sr	1020	-1.56213		ATCC + Sr	-1.56213	-1.43192	ATCC + Sr 1020				ATCC + Sr 1020		-1.43192
										Af293 + Sr	1020	-0.899704		1000											ATCC + Sr	1020	-1.5459		ATCC + Sr	-1.5459
Sample Name	Target Name	CT	∆∆Ct	Ct Mean	∆∆Ct mean	RQ log2	RQ log2 mean	name graph		Af293 + Sr	1020	-1.01089		990											ATCC + Sr	1020	-1.18773		ATCC + Sr	-1.18773
Af293	1020	34.3387	1	34.5596	1	0	0			ATCC	1020	0		980											Af293 + Sr	1010	1.41484		Af293 + Sr	1.41484	0.579499	Af293 + Sr				Af293 + Sr		0.579499
Af293	1020	35.2134	0.545395			-0.874626				ATCC	1020	-0.220577		970											Af293 + Sr	1010	-0.105111		Af293 + Sr	-0.105111
Af293	1020	34.1268	1.15828			0.211983				ATCC	1020	-0.46328		960											Af293 + Sr	1010	0.428772		Af293 + Sr	0.428772
Af293 + Sr	1020	34.6777	0.790597	35.0886	0.693044	-0.338985	-0.52898			ATCC + Sr	1020	-1.56213													ATCC + Sr	1010	6.67886		ATCC + Sr	6.67886	6.56373	ATCC + Sr				ATCC + Sr		6.56373
Af293 + Sr	1020	35.2384	0.535997			-0.899704				ATCC + Sr	1020	-1.5459													ATCC + Sr	1010	6.52642		ATCC + Sr	6.52642
Af293 + Sr	1020	35.3496	0.496238			-1.01089				ATCC + Sr	1020	-1.18773													ATCC + Sr	1010	6.4859		ATCC + Sr	6.4859
ATCC	1020	32.7085	1	32.9364	1	0	0			Af293	1010	0													Af293 + Sr	1000	3.45031		Af293 + Sr	3.45031	3.28526	Af293 + Sr				Af293 + Sr		3.28526
ATCC	1020	32.9291	0.858222			-0.220577				Af293	1010	-2.07407													Af293 + Sr	1000	3.17328		Af293 + Sr	3.17328
ATCC	1020	33.1718	0.725335			-0.46328				Af293	1010	-0.562474													Af293 + Sr	1000	3.23219		Af293 + Sr	3.23219
ATCC + Sr	1020	34.2706	0.338651	34.1404	0.43408	-1.56213	-1.20397			Af293 + Sr	1010	1.41484													ATCC + Sr	1000	6.65455		ATCC + Sr	6.65455	6.58918	ATCC + Sr				ATCC + Sr		6.58918
ATCC + Sr	1020	34.2544	0.342482			-1.5459				Af293 + Sr	1010	-0.105111													ATCC + Sr	1000	6.68435		ATCC + Sr	6.68435
ATCC + Sr	1020	33.8962	0.438993			-1.18773				Af293 + Sr	1010	0.428772													ATCC + Sr	1000	6.42864		ATCC + Sr	6.42864
Af293	1010	34.5391	1	35.4179	1	0	0			ATCC	1010	0													Af293 + Sr	990	0.147613		Af293 + Sr	0.147613	0.166746	Af293 + Sr				Af293 + Sr		0.166746
Af293	1010	36.6131	0.237489			-2.07407				ATCC	1010	-0.335739													Af293 + Sr	990	0.121387		Af293 + Sr	0.121387
Af293	1010	35.1015	0.67714			-0.562474				ATCC	1010	0.327028													Af293 + Sr	990	0.231239		Af293 + Sr	0.231239
Af293 + Sr	1010	33.1242	2.66629	33.9596	2.74793	1.41484	1.45835			ATCC + Sr	1010	6.67886													ATCC + Sr	990	2.93486		ATCC + Sr	2.93486	2.93486	ATCC + Sr				ATCC + Sr		2.93486
Af293 + Sr	1010	34.6442	0.929733			-0.105111				ATCC + Sr	1010	6.52642													ATCC + Sr	990	2.93486		ATCC + Sr	2.93486
Af293 + Sr	1010	34.1103	1.34609			0.428772				ATCC + Sr	1010	6.4859													ATCC + Sr	990	2.93486		ATCC + Sr	2.93486
ATCC	1010	31.8544	1	31.8573	1	0	0			Af293	1000	0													Af293 + Sr	980	0.358089		Af293 + Sr	0.358089	-0.142493	Af293 + Sr				Af293 + Sr		-0.142493
ATCC	1010	32.1902	0.792378			-0.335739				Af293	1000	-0.571221													Af293 + Sr	980	0.0459747		Af293 + Sr	0.0459747
ATCC	1010	31.5274	1.25443			0.327028				Af293	1000	-0.125226													Af293 + Sr	980	-0.831543		Af293 + Sr	-0.831543
ATCC + Sr	1010	25.1756	102.456	25.2907	94.7879	6.67886	6.56663			Af293 + Sr	1000	3.45031													ATCC + Sr	980	1.99531		ATCC + Sr	1.99531	2.14121	ATCC + Sr				ATCC + Sr		2.14121
ATCC + Sr	1010	25.328	92.1822			6.52642				Af293 + Sr	1000	3.17328													ATCC + Sr	980	2.15642		ATCC + Sr	2.15642
ATCC + Sr	1010	25.3685	89.6293			6.4859				Af293 + Sr	1000	3.23219													ATCC + Sr	980	2.2719		ATCC + Sr	2.2719
Af293	1000	37.3737	1	37.6058	1	0	0			ATCC	1000	0													Af293 + Sr	970	-1.065		Af293 + Sr	-1.065	-0.789682	Af293 + Sr				Af293 + Sr		-0.789682
Af293	1000	37.9449	0.673047			-0.571221				ATCC	1000	0.313492													Af293 + Sr	970	-0.710026		Af293 + Sr	-0.710026
Af293	1000	37.4989	0.91686			-0.125226				ATCC	1000	-0.40903													Af293 + Sr	970	-0.594017		Af293 + Sr	-0.594017
Af293 + Sr	1000	33.9234	10.9307	34.0884	11.451	3.45031	3.51741			ATCC + Sr	1000	6.65455													ATCC + Sr	970	3.57151		ATCC + Sr	3.57151	4.14073	ATCC + Sr				ATCC + Sr		4.14073
Af293 + Sr	1000	34.2004	9.02094			3.17328				ATCC + Sr	1000	6.68435													ATCC + Sr	970	4.53626		ATCC + Sr	4.53626
Af293 + Sr	1000	34.1415	9.3969			3.23219				ATCC + Sr	1000	6.42864													ATCC + Sr	970	4.31441		ATCC + Sr	4.31441
ATCC	1000	33.977	1	34.0088	1	0	0			Af293	990	0													Af293 + Sr	960	-0.569778		Af293 + Sr	-0.569778	-0.576377	Af293 + Sr				Af293 + Sr		-0.576377
ATCC	1000	33.6635	1.24271			0.313492				Af293	990	-0.254583													Af293 + Sr	960	-0.682816		Af293 + Sr	-0.682816
ATCC	1000	34.386	0.75313			-0.40903				Af293	990	-0.26331													Af293 + Sr	960	-0.476536		Af293 + Sr	-0.476536
ATCC + Sr	1000	27.3224	100.744	27.3878	98.4299	6.65455	6.62103			Af293 + Sr	990	0.147613													ATCC + Sr	960	-2.10585		ATCC + Sr	-2.10585	-1.8203	ATCC + Sr				ATCC + Sr		-1.8203
ATCC + Sr	1000	27.2926	102.847			6.68435				Af293 + Sr	990	0.121387													ATCC + Sr	960	-1.9396		ATCC + Sr	-1.9396
ATCC + Sr	1000	27.5483	86.1419			6.42864				Af293 + Sr	990	0.231239													ATCC + Sr	960	-1.41544		ATCC + Sr	-1.41544
Af293	990	32.216	1	32.3886	1	0	0			ATCC	990	0
Af293	990	32.4706	0.838229			-0.254583				ATCC	990	0
Af293	990	32.4793	0.833174			-0.26331				ATCC	990	0
Af293 + Sr	990	32.0684	1.10774	32.0493	1.26521	0.147613	0.339377			ATCC + Sr	990	2.93486
Af293 + Sr	990	32.0946	1.08778			0.121387				ATCC + Sr	990	2.93486
Af293 + Sr	990	31.9848	1.17384			0.231239				ATCC + Sr	990	2.93486
ATCC	990	29.5866	1	29.5866	1	0	0			Af293	980	0
ATCC	990	29.5866	1			0				Af293	980	-0.347343
ATCC	990	29.5866	1			0				Af293	980	0.425808
ATCC + Sr	990	26.6517	7.64683	26.6517	7.64683	2.93486	2.93486			Af293 + Sr	980	0.358089
ATCC + Sr	990	26.6517	7.64683			2.93486				Af293 + Sr	980	0.0459747
ATCC + Sr	990	26.6517	7.64683			2.93486				Af293 + Sr	980	-0.831543
Af293	980	34.2643	1	34.2381	1	0	0			ATCC	980	0
Af293	980	34.6116	0.78603			-0.347343				ATCC	980	0.162075
Af293	980	33.8385	1.34332			0.425808				ATCC	980	0.555229
Af293 + Sr	980	33.9062	1.28173	34.4068	0.889676	0.358089	-0.168648			ATCC + Sr	980	1.99531
Af293 + Sr	980	34.2183	1.03238			0.0459747				ATCC + Sr	980	2.15642
Af293 + Sr	980	35.0958	0.561928			-0.831543				ATCC + Sr	980	2.2719
ATCC	980	32.5597	1	32.3206	1	0	0			Af293	970	0
ATCC	980	32.3976	1.1189			0.162075				Af293	970	-1.0626
ATCC	980	32.0045	1.4694			0.555229				Af293	970	-2.8598
ATCC + Sr	980	30.5644	3.98701	30.4185	3.73759	1.99531	1.90211			Af293 + Sr	970	-1.065
ATCC + Sr	980	30.4033	4.45808			2.15642				Af293 + Sr	970	-0.710026
ATCC + Sr	980	30.2878	4.82959			2.2719				Af293 + Sr	970	-0.594017
Af293	970	32.7291	1	34.0366	1	0	0			ATCC	970	0
Af293	970	33.7917	0.478769			-1.0626				ATCC	970	-0.0437469
Af293	970	35.5889	0.137757			-2.8598				ATCC	970	-0.295094
Af293 + Sr	970	33.7941	0.477972	33.5188	1.43176	-1.065	0.517785			ATCC + Sr	970	3.57151
Af293 + Sr	970	33.4392	0.611309			-0.710026				ATCC + Sr	970	4.53626
Af293 + Sr	970	33.3232	0.662496			-0.594017				ATCC + Sr	970	4.31441
ATCC	970	33.2628	1	33.3757	1	0	0			Af293	960	0
ATCC	970	33.3065	0.970132			-0.0437469				Af293	960	-0.482944
ATCC	970	33.5579	0.815019			-0.295094				Af293	960	0.392145
ATCC + Sr	970	29.6913	11.8887	29.122	19.0759	3.57151	4.25368			Af293 + Sr	960	-0.569778
ATCC + Sr	970	28.7265	23.2033			4.53626				Af293 + Sr	960	-0.682816
ATCC + Sr	970	28.9484	19.8961			4.31441				Af293 + Sr	960	-0.476536
Af293	960	32.3359	1	32.3661	1	0	0			ATCC	960	0
Af293	960	32.8188	0.715516			-0.482944				ATCC	960	-1.61635
Af293	960	31.9437	1.31234			0.392145				ATCC	960	-1.3216
Af293 + Sr	960	32.9056	0.67372	32.9122	0.684864	-0.569778	-0.54611			ATCC + Sr	960	-2.10585
Af293 + Sr	960	33.0187	0.622948			-0.682816				ATCC + Sr	960	-1.9396
Af293 + Sr	960	32.8124	0.718701			-0.476536				ATCC + Sr	960	-1.41544
ATCC	960	31.2845	1	32.2639	1	0	0
ATCC	960	32.9009	0.32616			-1.61635
ATCC	960	32.6061	0.40009			-1.3216
ATCC + Sr	960	33.3904	0.232315	33.1048	0.558264	-2.10585	-0.840981
ATCC + Sr	960	33.2241	0.260688			-1.9396
ATCC + Sr	960	32.7	0.374895			-1.41544

## Sheet: actin for plate 1020 to 960
Target	Sample	Ct	CT mean	mean of means
actin	Af293	32.8724	32.6906	33.8777
	Af293	33.4411
	Af293	31.7583
	Af293 + Sr	33.5792	33.5658
	Af293 + Sr	33.3809
	Af293 + Sr	33.7374
	ATCC	34.2339	34.5537
	ATCC	34.2984
	ATCC	35.1287
	ATCC + Sr	34.9262	34.7009
	ATCC + Sr	35.1876
	ATCC + Sr	33.9888

## Sheet: Afu1g01020
Sample Name	Target Name	CT		Ct Mean	∆∆Ct	RQ log2	name graph
all	actin	see the first tab		33.8777
all	actin
all	actin
all	actin
Af293	1020	34.3387		34.5596	1	0
Af293	1020	35.2134
Af293	1020	34.1268
Af293 + Sr	1020	34.6777		35.0886	0.693044	-0.52898
Af293 + Sr	1020	35.2384
Af293 + Sr	1020	35.3496
ATCC	1020	32.7085		32.9364	1	0
ATCC	1020	32.9291
ATCC	1020	33.1718
ATCC + Sr	1020	34.2706		34.1404	0.43408	-1.20397
ATCC + Sr	1020	34.2544
ATCC + Sr	1020	33.8962

## Sheet: 960
Sample Name	Target Name	CT	Ct Mean	∆∆Ct	RQ log2	name graph
all	actin	see the first tab	33.8777
all	actin
all	actin
all	actin
Af293	960	32.3359	32.3661	1	0
Af293	960	32.8188
Af293	960	31.9437
Af293 + Sr	960	32.9056	32.9122	0.684864	-0.54611
Af293 + Sr	960	33.0187
Af293 + Sr	960	32.8124
ATCC	960	31.2845	32.2639	1	0
ATCC	960	32.9009
ATCC	960	32.6061
ATCC + Sr	960	33.3904	33.1048	0.558264	-0.840981
ATCC + Sr	960	33.2241
ATCC + Sr	960	32.7

## Sheet: 970
Sample Name	Target Name	CT	Ct Mean	∆∆Ct	RQ log2	name graph
all	actin	see the first tab	33.8777
all	actin
all	actin
all	actin
Af293	970	32.7291	34.0366	1	0
Af293	970	33.7917
Af293	970	35.5889
Af293 + Sr	970	33.7941	33.5188	1.43176	0.517785
Af293 + Sr	970	33.4392
Af293 + Sr	970	33.3232
ATCC	970	33.2628	33.3757	1	0
ATCC	970	33.3065
ATCC	970	33.5579
ATCC + Sr	970	29.6913	29.122	19.0759	4.25368
ATCC + Sr	970	28.7265
ATCC + Sr	970	28.9484

## Sheet: 980
Sample Name	Target Name	CT	Ct Mean	∆∆Ct	RQ log2	name graph
all	actin	see the first tab	33.8777
all	actin
all	actin
all	actin
Af293	980	34.2643	34.2381	1	0
Af293	980	34.6116
Af293	980	33.8385
Af293 + Sr	980	33.9062	34.4068	0.889676	-0.168648
Af293 + Sr	980	34.2183
Af293 + Sr	980	35.0958
ATCC	980	32.5597	32.3206	1	0
ATCC	980	32.3976
ATCC	980	32.0045
ATCC + Sr	980	30.5644	30.4185	3.73759	1.90211
ATCC + Sr	980	30.4033
ATCC + Sr	980	30.2878

## Sheet: actin for plate 1010 to 990
Target	Sample	Ct	CT mean	mean of means
actin	Af293	32.7186	32.4305	33.6867
	Af293	32.2302
	Af293	32.3428
	Af293 + Sr	32.7366	32.7869
	Af293 + Sr	32.7578
	Af293 + Sr	32.8663
	ATCC	34.0648	34.793
	ATCC	35.2235
	ATCC	35.0905
	ATCC + Sr	34.6515	34.7364
	ATCC + Sr	34.8504
	ATCC + Sr	34.7072

## Sheet: 1010
Sample Name	Target Name	CT	Ct Mean	∆∆Ct	RQ log2	name graph
all	actin	see the first tab	33.6867
all	actin
all	actin
all	actin
Af293	1010	34.5391	35.4179	1	0	Af293
Af293	1010	36.6131
Af293	1010	35.1015
Af293 + Sr	1010	33.1242	33.9596	2.74793	1.45835	Af293 + Sr
Af293 + Sr	1010	34.6442
Af293 + Sr	1010	34.1103
CEA17	1010
CEA17	1010
CEA17	1010
CEA17 + Sr	1010
CEA17 + Sr	1010
CEA17 + Sr	1010
ATCC	1010	31.8544	31.8573	1	0	ATCC
ATCC	1010	32.1902
ATCC	1010	31.5274
ATCC + Sr	1010	25.1756	25.2907	94.7879	6.56663	ATCC + Sr
ATCC + Sr	1010	25.328
ATCC + Sr	1010	25.3685

## Sheet: 1000
Sample Name	Target Name	CT	Ct Mean	∆∆Ct	RQ log2	name graph
all	actin	see the first tab	33.6867
all	actin
all	actin
all	actin
Af293	1000	37.3737	37.6058	1	0	Af293
Af293	1000	37.9449
Af293	1000	37.4989
Af293 + Sr	1000	33.9234	34.0884	11.451	3.51741	Af293 + Sr
Af293 + Sr	1000	34.2004
Af293 + Sr	1000	34.1415
CEA17	1000
CEA17	1000
CEA17	1000
CEA17 + Sr	1000
CEA17 + Sr	1000
CEA17 + Sr	1000
ATCC	1000	34.0088	34.0088	1	0	ATCC
ATCC	1000	34.0088
ATCC	1000	34.0088
ATCC + Sr	1000	27.3878	27.3878	98.4298	6.62102	ATCC + Sr
ATCC + Sr	1000	27.3878
ATCC + Sr	1000	27.3878

## Sheet: 990
Sample Name	Target Name	CT	Ct Mean	∆∆Ct	RQ log2	name graph
all	actin	see the first tab	33.6867
all	actin
all	actin
all	actin
Af293	990	32.216	32.3886	1	0	Af293
Af293	990	32.4706
Af293	990	32.4793
Af293 + Sr	990	32.0684	32.0493	1.26521	0.339377	Af293 + Sr
Af293 + Sr	990	32.0946
Af293 + Sr	990	31.9848
CEA17	990
CEA17	990
CEA17	990
CEA17 + Sr	990
CEA17 + Sr	990
CEA17 + Sr	990
ATCC	990	29.5866	29.5866	1	0	ATCC
ATCC	990	29.5866
ATCC	990	29.5866
ATCC + Sr	990	26.6517	26.6517	7.64683	2.93486	ATCC + Sr
ATCC + Sr	990	26.6517
ATCC + Sr	990	26.6517

[truncated: 2 more sheets: tab1, tab2]
