# Supplementary material for: Targeted induction of a silent fungal gene cluster encoding the bacteria-specific germination inhibitor fumigermin
Source: eLife. 2020 Feb 21;9:e52541. doi: 10.7554/eLife.52541 (PMC7034978; doi:10.7554/eLife.52541)
Supplement: Figure 2—figure supplement 1—source data 1. [file elife-52541-fig2-figsupp1-data1.xlsx]

## Sheet: 2-Pro_3Repl
Accession	Description	Coverage [%]	# PSMs	# Peptides	# Unique Peptides	# Razor Peptides	# AAs	MW [kDa]	calc. pI	Score Mascot: Mascot	Score MS Amanda 2.0: MS Amanda 2.0	Score Sequest HT: Sequest HT	Exp. q-value: Combined	Sum PEP Score	Modifications	Abundances (Normalized): F1: Sample	Abundances (Normalized): F2: Sample	Abundances (Normalized): F3: Sample	Abundances (Normalized): F4: Sample	Abundances (Normalized): F5: Sample	Abundances (Normalized): F6: Sample	Abundances (Normalized): F7: Sample	Abundances (Normalized): F8: Sample	Abundances (Normalized): F9: Sample	Abundance: F1: Sample	Abundance: F2: Sample	Abundance: F3: Sample	Abundance: F4: Sample	Abundance: F5: Sample	Abundance: F6: Sample	Abundance: F7: Sample	Abundance: F8: Sample	Abundance: F9: Sample	Abundances Count: F1: Sample	Abundances Count: F2: Sample	Abundances Count: F3: Sample	Abundances Count: F4: Sample	Abundances Count: F5: Sample	Abundances Count: F6: Sample	Abundances Count: F7: Sample	Abundances Count: F8: Sample	Abundances Count: F9: Sample	Found in Sample: [S1] F1: Sample	Found in Sample: [S2] F2: Sample	Found in Sample: [S3] F3: Sample	Found in Sample: [S4] F4: Sample	Found in Sample: [S5] F5: Sample	Found in Sample: [S6] F6: Sample	Found in Sample: [S7] F7: Sample
AN0567-T-p1	transcript=AN0567-T | gene=AN0567 | organism=Aspergillus_nidulans_FGSC_A4 | gene_product=Putative alcohol oxidase with a predicted role in glycerol metabolism | transcript_product=Putative alcohol oxidase with a predicted role in glycerol metabolism | location=ChrVIII_A_nidulans_FGSC_A4:3145731-3148146(+) | protein_length=624 | sequence_SO=chromosome | SO=protein_coding | is_pseudo=false	68	23713	48	48	0	624	69.4	7.24	183406	2.05884e+06	18897.8	0	796.809		1.50539e+10	1.65022e+10	1.97272e+10	1.85759e+10	1.89079e+10	1.91189e+10	1.87398e+10	2.02786e+10	1.71295e+10	1.50539e+10	1.51499e+10	1.33126e+10	1.01406e+10	7.78912e+09	8.14455e+09	1.06418e+10	1.10607e+10	7.94415e+09	51	52	53	55	55	55	51	50	52	High	High	High	High	High	High	High
AN6525-T-p1	transcript=AN6525-T | gene=AN6525 | organism=Aspergillus_nidulans_FGSC_A4 | gene_product=Putative formate dehydrogenase with a predicted role in oxalic acid metabolism | transcript_product=Putative formate dehydrogenase with a predicted role in oxalic acid metabolism | location=ChrI_A_nidulans_FGSC_A4:2370188-2371602(-) | protein_length=365 | sequence_SO=chromosome | SO=protein_coding | is_pseudo…	56	10093	20	20	0	365	40.1	6.54	70046	729778	6875.46	0	207.65		1.52573e+10	1.39392e+10	1.54227e+10	1.24708e+10	1.38864e+10	1.26073e+10	1.32645e+10	1.53631e+10	1.30904e+10	1.52573e+10	1.27969e+10	1.04078e+10	6.80786e+09	5.72048e+09	5.37067e+09	7.53251e+09	8.37956e+09	6.07094e+09	18	19	19	19	16	18	17	17	18	High	High	High	High	High	High	High
Afu1g01010-T-p1	transcript=Afu1g01010-T | gene=Afu1g01010 | organism=Aspergillus_fumigatus_Af293 | gene_product=Putative polyketide synthase (PKS) | transcript_product=Putative polyketide synthase (PKS) | location=Chr1_A_fumigatus_Af293:352044-358955(+) | protein_length=2098 | sequence_SO=chromosome | SO=protein_coding | is_pseudo=false	34	8605	64	64	0	2098	231.2	5.8	61319	566076	5488.04	0	535.264		3.93521e+09	3.81881e+09	3.43467e+09	3.24865e+09	3.13913e+09	2.95156e+09	3.38258e+09	2.91748e+09	3.60268e+09	3.93521e+09	3.50588e+09	2.31785e+09	1.77345e+09	1.29316e+09	1.25735e+09	1.92086e+09	1.5913e+09	1.67081e+09	64	60	58	61	63	61	63	60	61	High	High	High	High	High	High	High
AN5028-T-p1	transcript=AN5028-T | gene=AN5028 | organism=Aspergillus_nidulans_FGSC_A4 | gene_product=Fatty acid oxygenase that plays a role in oxylipin biosynthesis | transcript_product=Fatty acid oxygenase that plays a role in oxylipin biosynthesis | location=ChrIII_A_nidulans_FGSC_A4:237584-241516(-) | protein_length=1117 | sequence_SO=chromosome | SO=protein_coding | is_pseudo=false	59	8091	60	60	0	1117	124.7	6.4	45992	540229	4963.14	0	471.563		3.81434e+09	3.60914e+09	3.66067e+09	3.49636e+09	3.84299e+09	3.60882e+09	3.74127e+09	4.41834e+09	3.79508e+09	3.81434e+09	3.3134e+09	2.47036e+09	1.90867e+09	1.58312e+09	1.53734e+09	2.12455e+09	2.40992e+09	1.76004e+09	53	50	54	51	51	52	51	49	47	High	High	High	High	High	High	High
AN6330-T-p1	transcript=AN6330-T | gene=AN6330 | organism=Aspergillus_nidulans_FGSC_A4 | gene_product=Putative elongation factor 2 | transcript_product=Putative elongation factor 2 | location=ChrI_A_nidulans_FGSC_A4:503121-505935(-) | protein_length=844 | sequence_SO=chromosome | SO=protein_coding | is_pseudo=false	51	7568	45	44	1	844	93.7	6.68	52167	533608	4577.23	0	355.973		3.15146e+09	4.75567e+09	4.63382e+09	4.05288e+09	4.15757e+09	3.04817e+09	3.75708e+09	4.49764e+09	3.51483e+09	3.15146e+09	4.36597e+09	3.12708e+09	2.21248e+09	1.71271e+09	1.29851e+09	2.13353e+09	2.45317e+09	1.63007e+09	43	44	45	47	44	42	45	44	43	High	High	High	High	High	High	High
AN4443-T-p1	transcript=AN4443-T | gene=AN4443 | organism=Aspergillus_nidulans_FGSC_A4 | gene_product=Putative methionine synthase with a predicted role in methionine metabolism | transcript_product=Putative methionine synthase with a predicted role in methionine metabolism | location=ChrIII_A_nidulans_FGSC_A4:2032252-2034641(+) | protein_length=774 | sequence_SO=chromosome | SO=protein_coding | is_pseudo=fal…	63	6403	43	43	0	774	86.8	6.83	48768	490494	4894.37	0	376.449	Acetyl [N-Term]	7.97841e+09	7.22569e+09	5.77917e+09	6.28728e+09	5.85852e+09	6.88931e+09	5.70042e+09	6.31717e+09	6.18025e+09	7.97841e+09	6.6336e+09	3.90001e+09	3.43224e+09	2.41342e+09	2.93481e+09	3.2371e+09	3.44561e+09	2.86621e+09	40	39	39	45	41	41	40	39	40	High	High	High	High	High	High	High
AN4218-T-p1	transcript=AN4218-T | gene=AN4218 | organism=Aspergillus_nidulans_FGSC_A4 | gene_product=Ortholog(s) have GDP binding, GTP binding, calmodulin binding, translation elongation factor activity and role in cytoplasmic translational elongation, interaction with host, tRNA export from nucleus | transcript_product=Ortholog(s) have GDP binding, GTP binding, calmodulin binding, translation elongation fac…	39	5870	20	20	0	460	49.7	9.06	38833	351781	3275.79	0	147.073		8.38051e+09	7.84002e+09	8.01004e+09	7.35042e+09	7.15992e+09	7.95416e+09	6.41371e+09	4.98823e+09	7.12169e+09	8.38051e+09	7.19758e+09	5.40548e+09	4.01261e+09	2.94953e+09	3.38843e+09	3.64215e+09	2.72076e+09	3.30282e+09	19	18	18	19	19	15	19	17	18	High	High	High	High	High	High	High
AN2315-T-p1	transcript=AN2315-T | gene=AN2315 | organism=Aspergillus_nidulans_FGSC_A4 | gene_product=Putative F1F0-ATPase complex subunit with a predicted role in energy metabolism | transcript_product=Putative F1F0-ATPase complex subunit with a predicted role in energy metabolism | location=ChrVII_A_nidulans_FGSC_A4:3532189-3534202(-) | protein_length=518 | sequence_SO=chromosome | SO=protein_coding | is_ps…	67	5694	26	26	0	518	55.4	5.36	52626	479711	4716.91	0	350.971		1.72496e+09	1.45509e+09	1.69583e+09	1.37586e+09	2.40514e+09	1.34514e+09	1.64066e+09	1.76316e+09	2.38606e+09	1.72496e+09	1.33586e+09	1.14441e+09	7.51088e+08	9.90799e+08	5.73022e+08	9.31682e+08	9.61687e+08	1.10658e+09	27	27	26	29	29	28	26	28	28	High	High	High	High	High	High	High
AN8269-T-p1	transcript=AN8269-T | gene=AN8269 | organism=Aspergillus_nidulans_FGSC_A4 | gene_product=90 kilodalton heat shock protein | transcript_product=90 kilodalton heat shock protein | location=ChrII_A_nidulans_FGSC_A4:1334878-1337036(+) | protein_length=700 | sequence_SO=chromosome | SO=protein_coding | is_pseudo=false	57	5589	45	45	0	700	79.8	5	47458	442515	3981.29	0	353.883		3.12364e+09	2.95651e+09	3.40539e+09	3.55313e+09	3.42199e+09	3.46372e+09	3.44354e+09	3.04252e+09	2.73281e+09	3.12364e+09	2.71424e+09	2.29809e+09	1.93966e+09	1.40969e+09	1.47553e+09	1.95548e+09	1.6595e+09	1.2674e+09	42	41	42	38	39	38	38	39	40	High	High	High	High	High	High	High
AN7388-T-p1	transcript=AN7388-T | gene=AN7388 | organism=Aspergillus_nidulans_FGSC_A4 | gene_product=Putative catalase-peroxidase with a predicted role in gluconic acid and gluconate metabolism | transcript_product=Putative catalase-peroxidase with a predicted role in gluconic acid and gluconate metabolism | location=ChrIV_A_nidulans_FGSC_A4:112306-114525(-) | protein_length=739 | sequence_SO=chromosome | SO…	53	5500	35	35	0	739	82.1	6.29	46041	406313	4037.7	0	276.161		2.15967e+09	2.12241e+09	1.98418e+09	2.18742e+09	2.23441e+09	2.41766e+09	2.41751e+09	2.99023e+09	3.17172e+09	2.15967e+09	1.94849e+09	1.339e+09	1.19412e+09	9.20465e+08	1.02991e+09	1.37283e+09	1.63097e+09	1.47094e+09	31	31	31	34	32	33	31	31	31	High	High	High	High	High	High	High
AN5746-T-p1	transcript=AN5746-T | gene=AN5746 | organism=Aspergillus_nidulans_FGSC_A4 | gene_product=Putative phosphopyruvate hydratase with a predicted role in gluconeogenesis and glycolysis | transcript_product=Putative phosphopyruvate hydratase with a predicted role in gluconeogenesis and glycolysis | location=ChrV_A_nidulans_FGSC_A4:1820581-1822132(+) | protein_length=438 | sequence_SO=chromosome | SO=pr…	66	4913	20	20	0	438	47.5	5.57	53460	426765	4259.51	0	235.851		9.86737e+08	1.97426e+09	1.20756e+09	1.35348e+09	1.13177e+09	1.38872e+09	1.24022e+09	1.4363e+09	1.48919e+09	9.86737e+08	1.81248e+09	8.14907e+08	7.38868e+08	4.66233e+08	5.91586e+08	7.04284e+08	7.83409e+08	6.90642e+08	17	17	19	18	17	17	16	17	17	High	High	High	High	High	High	High
AN0554-T-p1	transcript=AN0554-T | gene=AN0554 | organism=Aspergillus_nidulans_FGSC_A4 | gene_product=Aldehyde dehydrogenase | transcript_product=Aldehyde dehydrogenase | location=ChrVIII_A_nidulans_FGSC_A4:3188631-3190243(+) | protein_length=497 | sequence_SO=chromosome | SO=protein_coding | is_pseudo=false	49	4642	23	22	1	497	54.1	6.62	29326	304079	2707.08	0	180.052		2.63617e+09	3.77679e+09	4.02257e+09	2.41242e+09	2.86097e+09	2.26465e+09	2.88438e+09	2.99307e+09	2.771e+09	2.63617e+09	3.46731e+09	2.71459e+09	1.31695e+09	1.17858e+09	9.6473e+08	1.63795e+09	1.63253e+09	1.2851e+09	24	25	25	24	25	24	26	24	24	High	High	High	High	High	High	High
AN1523-T-p1	transcript=AN1523-T | gene=AN1523 | organism=Aspergillus_nidulans_FGSC_A4 | gene_product=Putative F1F0-ATPase complex subunit with a predicted role in energy metabolism | transcript_product=Putative F1F0-ATPase complex subunit with a predicted role in energy metabolism | location=ChrVII_A_nidulans_FGSC_A4:1062828-1064931(+) | protein_length=556 | sequence_SO=chromosome | SO=protein_coding | is_ps…	57	4396	33	33	0	556	60	9.14	29165	316153	3012.27	0	213.107		3.60115e+09	2.62978e+09	2.10544e+09	2.15923e+09	2.72037e+09	3.3121e+09	2.77753e+09	2.63585e+09	2.95896e+09	3.60115e+09	2.41429e+09	1.42083e+09	1.17873e+09	1.12066e+09	1.41094e+09	1.57727e+09	1.43769e+09	1.37227e+09	25	28	30	31	28	28	28	27	26	High	High	High	High	High	High	High
AN0688-T-p1	transcript=AN0688-T | gene=AN0688 | organism=Aspergillus_nidulans_FGSC_A4 | gene_product=Putative transketolase with a predicted role in the pentose-phosphate shunt or xylulose metabolism | transcript_product=Putative transketolase with a predicted role in the pentose-phosphate shunt or xylulose metabolism | location=ChrVIII_A_nidulans_FGSC_A4:2786646-2789142(+) | protein_length=684 | sequence_SO…	45	4246	27	27	0	684	74.5	6.37	30540	303385	2904.29	0	238.872		1.66037e+09	1.49614e+09	1.63892e+09	1.97245e+09	2.10618e+09	2.12494e+09	1.63827e+09	1.75921e+09	1.70735e+09	1.66037e+09	1.37355e+09	1.106e+09	1.07676e+09	8.6764e+08	9.05212e+08	9.30324e+08	9.59536e+08	7.91815e+08	25	22	22	23	24	23	21	24	23	High	High	High	High	High	High	High
AN8953-T-p1	transcript=AN8953-T | gene=AN8953 | organism=Aspergillus_nidulans_FGSC_A4 | gene_product=Putative alpha-glucosidase with a predicted role in maltose metabolism | transcript_product=Putative alpha-glucosidase with a predicted role in maltose metabolism | location=ChrVII_A_nidulans_FGSC_A4:314155-317209(-) | protein_length=955 | sequence_SO=chromosome | SO=protein_coding | is_pseudo=false	37	3990	25	24	1	955	107.5	5.31	28595	289235	2732.41	0	236.115		1.06415e+09	9.66394e+08	9.7698e+08	9.15558e+08	1.00647e+09	1.10624e+09	1.08667e+09	1.08769e+09	9.06162e+08	1.06415e+09	8.87205e+08	6.59303e+08	4.99806e+08	4.14615e+08	4.71253e+08	6.17089e+08	5.93267e+08	4.2025e+08	23	23	23	24	23	23	23	22	20	High	High	High	High	High	High	High
AN0734-T-p1	transcript=AN0734-T | gene=AN0734 | organism=Aspergillus_nidulans_FGSC_A4 | gene_product=Histone H4.1, core histone protein | transcript_product=Histone H4.1, core histone protein | location=ChrVIII_A_nidulans_FGSC_A4:2629235-2629659(-) | protein_length=103 | sequence_SO=chromosome | SO=protein_coding | is_pseudo=false	56	3675	9	1	9	103	11.3	11.36	37423	279806	2879.04	0	62.185		1.01727e+09	1.16027e+09	1.64588e+09	2.13277e+09	2.52283e+09	2.70491e+09	2.88162e+09	2.79493e+09	2.39963e+09	1.01727e+09	1.06519e+09	1.1107e+09	1.16429e+09	1.03928e+09	1.15228e+09	1.63638e+09	1.52445e+09	1.11288e+09	8	7	6	10	8	9	6	6	8	High	High	High	High	High	High	High
AN4064-T-p1	transcript=AN4064-T | gene=AN4064 | organism=Aspergillus_nidulans_FGSC_A4 | gene_product=Putative ADP/ATP carrier protein with a predicted role in energy metabolism | transcript_product=Putative ADP/ATP carrier protein with a predicted role in energy metabolism | location=ChrII_A_nidulans_FGSC_A4:2198941-2200252(+) | protein_length=311 | sequence_SO=chromosome | SO=protein_coding | is_pseudo=false	53	3630	15	15	0	311	33.8	9.89	30090	270864	2214.05	0	107.649		2.03365e+09	2.49183e+09	2.27629e+09	3.62151e+09	2.59998e+09	2.87117e+09	2.07872e+09	3.46768e+09	5.18196e+09	2.03365e+09	2.28764e+09	1.53612e+09	1.97699e+09	1.07106e+09	1.2231e+09	1.18044e+09	1.8914e+09	2.40323e+09	16	15	14	16	17	17	15	15	15	High	High	High	High	High	High	High
AN0241-T-p1	transcript=AN0241-T | gene=AN0241 | organism=Aspergillus_nidulans_FGSC_A4 | gene_product=Cu/Zn-superoxide dismutase | transcript_product=Cu/Zn-superoxide dismutase | location=ChrVIII_A_nidulans_FGSC_A4:4171671-4172630(-) | protein_length=154 | sequence_SO=chromosome | SO=protein_coding | is_pseudo=false	75	3622	11	11	0	154	16	6.28	29560	290829	2705.27	0	89.343		1.52972e+09	9.24111e+08	2.13316e+09	2.84048e+09	2.83109e+09	2.73223e+09	1.33006e+09	2.5395e+09	3.42456e+09	1.52972e+09	8.48387e+08	1.43954e+09	1.55063e+09	1.16627e+09	1.16391e+09	7.55303e+08	1.38513e+09	1.58821e+09	11	10	10	11	10	10	10	10	11	High	High	High	High	High	High	High
AN5129-T-p1	transcript=AN5129-T | gene=AN5129 | organism=Aspergillus_nidulans_FGSC_A4 | gene_product=70 kilodalton heat shock protein | transcript_product=70 kilodalton heat shock protein | location=ChrV_A_nidulans_FGSC_A4:1233671-1235605(+) | protein_length=644 | sequence_SO=chromosome | SO=protein_coding | is_pseudo=false	47	3614	31	29	2	644	69.9	5.14	28715	278515	2454.04	0	253.671		8.14932e+08	1.03537e+09	1.24926e+09	1.67527e+09	1.72762e+09	1.92696e+09	2.24774e+09	3.16638e+09	2.68017e+09	8.14932e+08	9.50532e+08	8.43048e+08	9.14534e+08	7.11691e+08	8.20873e+08	1.27642e+09	1.72706e+09	1.24298e+09	30	31	30	33	30	31	29	29	27	High	High	High	High	High	High	High
AN12473-T-p1	transcript=AN12473-T | gene=AN12473 | organism=Aspergillus_nidulans_FGSC_A4 | gene_product=Putative heat shock protein | transcript_product=Putative heat shock protein | location=ChrVII_A_nidulans_FGSC_A4:681298-683574(+) | protein_length=614 | sequence_SO=chromosome | SO=protein_coding | is_pseudo=false	52	3595	28	28	0	614	67	5.33	29518	299270	2960.09	0	297.809		9.29346e+08	7.43196e+08	8.14384e+08	1.02506e+09	1.05057e+09	1.06225e+09	8.43877e+08	9.19295e+08	1.0769e+09	9.29346e+08	6.82296e+08	5.49577e+08	5.59586e+08	4.3278e+08	4.52511e+08	4.79212e+08	5.01416e+08	4.99433e+08	31	32	30	31	29	32	31	29	29	High	High	High	High	High	High	High
AN2426-T-p1	transcript=AN2426-T | gene=AN2426 | organism=Aspergillus_nidulans_FGSC_A4 | gene_product=Histone H4.2, core histone protein | transcript_product=Histone H4.2, core histone protein | location=ChrVII_A_nidulans_FGSC_A4:3917716-3918193(+) | protein_length=103 | sequence_SO=chromosome | SO=protein_coding | is_pseudo=false	56	3490	9	1	0	103	11.4	11.36	37344	269354	2775.89	0	61.872		3.63526e+07	7.95944e+07	7.32751e+07	4.36478e+07	6.99914e+07	3.00702e+07	7.91301e+07	7.57462e+07	8.99753e+07	3.63526e+07	7.30722e+07	4.94488e+07	2.38275e+07	2.8833e+07	1.28097e+07	44935580	4.13146e+07	4.17278e+07	1	1	1	1	1	1	1	1	1	High	High	High	High	High	High	High
AN5975-T-p1	transcript=AN5975-T | gene=AN5975 | organism=Aspergillus_nidulans_FGSC_A4 | gene_product=Putative mannitol-1-phosphate 5-dehydrogenase with a predicted role in mannose/mannitol, fructose, and sorbose/sorbitol metabolism | transcript_product=Putative mannitol-1-phosphate 5-dehydrogenase with a predicted role in mannose/mannitol, fructose, and sorbose/sorbitol metabolism | location=ChrI_A_nidulans_…	55	3352	21	21	0	386	43.1	6.15	26275	221974	1997.81	0	177.283		1.43886e+09	9.80617e+08	8.28482e+08	1.1871e+09	1.02557e+09	1.01089e+09	1.07966e+09	1.0136e+09	9.05637e+08	1.43886e+09	9.00263e+08	5.59091e+08	6.48039e+08	4.22482e+08	4.30632e+08	6.13107e+08	5.52855e+08	4.20006e+08	19	17	17	16	18	17	16	18	17	High	High	High	High	High	High	High
AN8275-T-p1	transcript=AN8275-T | gene=AN8275 | organism=Aspergillus_nidulans_FGSC_A4 | gene_product=Mitochondrial citrate synthase with a predicted role in the TCA cycle | transcript_product=Mitochondrial citrate synthase with a predicted role in the TCA cycle | location=ChrII_A_nidulans_FGSC_A4:1352891-1354742(-) | protein_length=474 | sequence_SO=chromosome | SO=protein_coding | is_pseudo=false	35	3351	21	21	0	474	52.2	8.59	24246	210398	1751.64	0	150.305		1.50439e+09	1.45951e+09	1.08871e+09	1.36575e+09	1.17385e+09	1.2766e+09	1.24561e+09	1.17782e+09	1.3057e+09	1.50439e+09	1.33991e+09	7.34706e+08	7.45565e+08	4.83568e+08	5.43824e+08	7.07346e+08	6.42425e+08	6.05546e+08	20	20	20	22	21	20	19	17	19	High	High	High	High	High	High	High
AN6542-T-p1	transcript=AN6542-T | gene=AN6542 | organism=Aspergillus_nidulans_FGSC_A4 | gene_product=Gamma-actin | transcript_product=Gamma-actin | location=ChrI_A_nidulans_FGSC_A4:2419296-2421081(-) | protein_length=375 | sequence_SO=chromosome | SO=protein_coding | is_pseudo=false	55	3220	18	18	0	375	41.6	5.69	26398	258615	2315.71	0	185.652		2.18553e+09	1.88606e+09	2.00644e+09	1.69766e+09	1.82456e+09	2.01887e+09	2.07764e+09	2.01979e+09	1.75697e+09	2.18553e+09	1.73151e+09	1.35402e+09	9.26757e+08	7.51629e+08	8.6003e+08	1.17983e+09	1.10167e+09	8.1483e+08	18	16	15	18	18	20	18	17	16	High	High	High	High	High	High	High
AN5744-T-p1	transcript=AN5744-T | gene=AN5744 | organism=Aspergillus_nidulans_FGSC_A4 | gene_product=Putative 14-3-3-like protein | transcript_product=Putative 14-3-3-like protein | location=ChrV_A_nidulans_FGSC_A4:1824472-1825847(-) | protein_length=270 | sequence_SO=chromosome | SO=protein_coding | is_pseudo=false	73	3088	20	18	3	270	30.6	4.87	25138	244273	2247.63	0	215.81		1.55601e+09	1.46987e+09	1.57689e+09	1.3152e+09	1.29739e+09	1.40037e+09	1.52773e+09	1.29267e+09	1.36326e+09	1.55601e+09	1.34943e+09	1.06415e+09	7.17973e+08	5.3446e+08	5.96552e+08	8.67553e+08	7.05067e+08	6.3224e+08	21	20	19	21	20	19	21	18	18	High	High	High	High	High	High	High
AN3674-T-p1	transcript=AN3674-T | gene=AN3674 | organism=Aspergillus_nidulans_FGSC_A4 | gene_product=Has domain(s) with predicted phospholipid binding activity | transcript_product=Has domain(s) with predicted phospholipid binding activity | location=ChrII_A_nidulans_FGSC_A4:3409518-3411360(-) | protein_length=556 | sequence_SO=chromosome | SO=protein_coding | is_pseudo=false	64	3015	27	27	0	556	58.2	4.88	24726	200892	1939.53	0	264.227	Acetyl [N-Term]	1.04915e+09	9.80097e+08	1.2916e+09	1.04741e+09	1.2605e+09	1.47989e+09	9.87008e+08	1.30446e+09	1.64363e+09	1.04915e+09	8.99785e+08	8.71619e+08	5.71782e+08	5.19261e+08	6.30424e+08	5.60492e+08	7.11499e+08	7.62264e+08	24	26	25	25	25	24	24	22	23	High	High	High	High	High	High	High
AN10709-T-p1	transcript=AN10709-T | gene=AN10709 | organism=Aspergillus_nidulans_FGSC_A4 | gene_product=Putative glutamine-fructose-6-phosphate transaminase | transcript_product=Putative glutamine-fructose-6-phosphate transaminase | location=ChrV_A_nidulans_FGSC_A4:1688422-1690855(+) | protein_length=694 | sequence_SO=chromosome | SO=protein_coding | is_pseudo=false	41	2905	27	27	0	694	77.4	6.65	19355	198955	1770.8	0	236.47		8.25831e+08	6.1391e+08	5.19917e+08	5.88835e+08	6.20899e+08	4.94453e+08	5.25661e+08	7.86518e+08	6.67203e+08	8.25831e+08	5.63605e+08	3.5086e+08	3.21447e+08	2.55779e+08	2.10634e+08	2.98507e+08	4.28995e+08	3.09428e+08	27	24	23	23	25	24	24	23	24	High	High	High	High	High	High	High
AN9339-T-p1	transcript=AN9339-T | gene=AN9339 | organism=Aspergillus_nidulans_FGSC_A4 | gene_product=Hyphal catalase with a predicted role in gluconic acid and gluconate metabolism | transcript_product=Hyphal catalase with a predicted role in gluconic acid and gluconate metabolism | location=ChrVIII_A_nidulans_FGSC_A4:329633-332021(-) | protein_length=721 | sequence_SO=chromosome | SO=protein_coding | is_pse…	58	2856	31	31	0	721	79.1	5.07	31460	230006	2417.96	0	244.042		4.98692e+08	4.71837e+08	6.34685e+08	7.17134e+08	7.94441e+08	8.96667e+08	1.00681e+09	1.06584e+09	1.22236e+09	4.98692e+08	4.33173e+08	4.2831e+08	3.91485e+08	3.2727e+08	3.81976e+08	5.71736e+08	5.81346e+08	5.66891e+08	30	31	30	30	30	29	29	30	27	High	High	High	High	High	High	High
AN3469-T-p1	transcript=AN3469-T | gene=AN3469 | organism=Aspergillus_nidulans_FGSC_A4 | gene_product=Histone H2B | transcript_product=Histone H2B | location=ChrVI_A_nidulans_FGSC_A4:631405-631977(-) | protein_length=140 | sequence_SO=chromosome | SO=protein_coding | is_pseudo=false	51	2736	9	9	0	140	14.9	10.13	23203	191940	1763.12	0	70.716		2.30353e+09	3.01887e+09	2.89515e+09	2.16013e+09	2.15741e+09	1.55918e+09	2.43017e+09	1.89466e+09	2.22027e+09	2.30353e+09	2.77149e+09	1.95376e+09	1.17922e+09	8.88745e+08	6.64203e+08	1.38002e+09	1.03341e+09	1.02969e+09	10	9	9	10	10	9	10	10	8	High	High	High	High	High	High	High
AN8176-T-p1	transcript=AN8176-T | gene=AN8176 | organism=Aspergillus_nidulans_FGSC_A4 | gene_product=Has domain(s) with predicted structural constituent of ribosome activity, role in translation and ribosome localization | transcript_product=Has domain(s) with predicted structural constituent of ribosome activity, role in translation and ribosome localization | location=ChrII_A_nidulans_FGSC_A4:1019955-10212…	49	2697	17	17	0	372	40.2	10.77	29180	243304	2532.44	0	176.864		4.73555e+08	7.11037e+08	7.50591e+08	5.53684e+08	5.75402e+08	5.5963e+08	5.41923e+08	6.85105e+08	6.72152e+08	4.73555e+08	6.52772e+08	5.06528e+08	3.02257e+08	2.37037e+08	2.384e+08	3.07741e+08	3.7368e+08	3.11723e+08	15	13	14	15	15	17	16	15	15	High	High	High	High	High	High	High
AN7632-T-p1	transcript=AN7632-T | gene=AN7632 | organism=Aspergillus_nidulans_FGSC_A4 | gene_product=Putative dehydrogenase with a predicted role in two-carbon compound metabolism | transcript_product=Putative dehydrogenase with a predicted role in two-carbon compound metabolism | location=ChrIV_A_nidulans_FGSC_A4:2201408-2202822(-) | protein_length=379 | sequence_SO=chromosome | SO=protein_coding | is_pseud…	34	2591	15	15	0	379	40	6.7	22885	186745	1714.63	0	117.548		1.87227e+09	2.34121e+09	2.14392e+09	2.18625e+09	2.39857e+09	2.66582e+09	4.01827e+09	2.75073e+09	2.99225e+09	1.87227e+09	2.14937e+09	1.4468e+09	1.19348e+09	9.8809e+08	1.13562e+09	2.28185e+09	1.50035e+09	1.38771e+09	16	13	14	13	15	14	15	15	12	High	High	High	High	High	High	High
AN4859-T-p1	transcript=AN4859-T | gene=AN4859 | organism=Aspergillus_nidulans_FGSC_A4 | gene_product=Plasma membrane ATPase with a predicted role in energy metabolism | transcript_product=Plasma membrane ATPase with a predicted role in energy metabolism | location=ChrIII_A_nidulans_FGSC_A4:745667-748768(-) | protein_length=990 | sequence_SO=chromosome | SO=protein_coding | is_pseudo=false	26	2520	22	17	5	990	108.7	5.36	11887	155174	1461.56	0	167.928		5.76868e+08	8.24519e+08	9.58799e+08	9.56884e+08	6.67324e+08	7.23305e+08	5.94015e+08	4.36091e+08	5.28903e+08	5.76868e+08	7.56956e+08	6.47034e+08	5.22365e+08	2.74904e+08	3.08124e+08	3.37323e+08	2.37859e+08	2.45289e+08	19	20	19	20	19	19	19	18	20	High	High	High	High	High	High	High
AN0240-T-p1	transcript=AN0240-T | gene=AN0240 | organism=Aspergillus_nidulans_FGSC_A4 | gene_product=Putative transaldolase with a predicted role in the pentose-phosphate shunt | transcript_product=Putative transaldolase with a predicted role in the pentose-phosphate shunt | location=ChrVIII_A_nidulans_FGSC_A4:4173570-4174727(-) | protein_length=324 | sequence_SO=chromosome | SO=protein_coding | is_pseudo=fa…	52	2450	17	17	0	324	35.5	5.81	20155	172122	1628.88	0	122.826		1.28522e+09	1.4585e+09	1.07657e+09	1.29889e+09	1.45044e+09	1.27212e+09	1.15398e+09	1.57649e+09	1.60952e+09	1.28522e+09	1.33899e+09	7.26508e+08	7.09065e+08	5.97508e+08	5.41914e+08	6.55311e+08	8.59873e+08	7.46447e+08	15	15	14	17	17	16	12	16	15	High	High	High	High	High	High	High
AN6202-T-p1	transcript=AN6202-T | gene=AN6202 | organism=Aspergillus_nidulans_FGSC_A4 | gene_product=Putative ribosomal protein L3 | transcript_product=Putative ribosomal protein L3 | location=ChrI_A_nidulans_FGSC_A4:928193-929697(-) | protein_length=392 | sequence_SO=chromosome | SO=protein_coding | is_pseudo=false	48	2416	21	21	0	392	44.4	10.2	14267	161073	1458.35	0	127.801		1.34936e+09	1.28169e+09	7.07976e+08	1.14547e+09	8.98235e+08	9.47932e+08	1.00933e+09	5.86847e+08	5.94076e+08	1.34936e+09	1.17667e+09	4.77769e+08	6.25313e+08	3.70028e+08	4.03814e+08	5.73171e+08	3.20087e+08	2.75514e+08	18	15	15	19	18	16	17	14	15	High	High	High	High	High	High	High
AN8277-T-p1	transcript=AN8277-T | gene=AN8277 | organism=Aspergillus_nidulans_FGSC_A4 | gene_product=Putative bifunctional enzyme with a predicted role in methionine metabolism | transcript_product=Putative bifunctional enzyme with a predicted role in methionine metabolism | location=ChrII_A_nidulans_FGSC_A4:1359611-1361209(-) | protein_length=437 | sequence_SO=chromosome | SO=protein_coding | is_pseudo=false	55	2376	17	17	0	437	47.3	6.48	25666	199902	2230.39	0	209.993		7.85503e+08	6.01565e+08	6.31114e+08	6.38364e+08	7.38039e+08	5.84036e+08	6.72425e+08	7.24585e+08	7.3373e+08	7.85503e+08	5.52271e+08	4.259e+08	3.48485e+08	3.04035e+08	2.48796e+08	3.8185e+08	3.95214e+08	3.40281e+08	17	16	16	16	16	15	17	17	15	High	High	High	High	High	High	High
AN6089-T-p1	transcript=AN6089-T | gene=AN6089 | organism=Aspergillus_nidulans_FGSC_A4 | gene_product=Putative 60 kilodalton heat shock protein | transcript_product=Putative 60 kilodalton heat shock protein | location=ChrI_A_nidulans_FGSC_A4:1294502-1296460(+) | protein_length=588 | sequence_SO=chromosome | SO=protein_coding | is_pseudo=false	57	2345	29	29	0	588	61.8	5.63	20752	191444	1762.31	0	205.437		2.19267e+09	1.72946e+09	1.80495e+09	1.48905e+09	1.5437e+09	1.40177e+09	1.41016e+09	1.02481e+09	1.00279e+09	2.19267e+09	1.58774e+09	1.21805e+09	8.12875e+08	6.35928e+08	5.97146e+08	8.00788e+08	5.58965e+08	4.65065e+08	27	27	27	27	25	27	25	24	26	High	High	High	High	High	High	High
AN5525-T-p1	transcript=AN5525-T | gene=AN5525 | organism=Aspergillus_nidulans_FGSC_A4 | gene_product=Putative aconitate hydratase with a predicted role in the TCA cycle | transcript_product=Putative aconitate hydratase with a predicted role in the TCA cycle | location=ChrV_A_nidulans_FGSC_A4:2516549-2519412(+) | protein_length=783 | sequence_SO=chromosome | SO=protein_coding | is_pseudo=false	37	2335	26	25	1	783	84.9	6.74	16555	172798	1772.66	0	193.277		7.57235e+08	4.74867e+08	5.0827e+08	6.82566e+08	6.38293e+08	7.43601e+08	4.66833e+08	7.23111e+08	5.32319e+08	7.57235e+08	4.35955e+08	3.43e+08	3.72615e+08	2.62945e+08	3.1677e+08	2.651e+08	3.9441e+08	2.46873e+08	29	24	25	26	25	24	25	25	26	High	High	High	High	High	High	High
AN8041-T-p1	transcript=AN8041-T | gene=AN8041 | organism=Aspergillus_nidulans_FGSC_A4 | gene_product=Glyceraldehyde-3-phosphate dehydrogenase with a predicted role in gluconeogenesis and glycolysis | transcript_product=Glyceraldehyde-3-phosphate dehydrogenase with a predicted role in gluconeogenesis and glycolysis | location=ChrII_A_nidulans_FGSC_A4:580314-581717(+) | protein_length=336 | sequence_SO=chromos…	57	2314	19	19	0	336	36.3	7.47	27411	190589	2096.1	0	116.204		2.36031e+09	1.84526e+09	1.68007e+09	1.5723e+09	1.42551e+09	1.576e+09	1.01886e+09	1.4615e+09	1.88461e+09	2.36031e+09	1.69405e+09	1.13377e+09	8.58326e+08	5.87241e+08	6.71368e+08	5.78579e+08	7.97151e+08	8.74024e+08	18	20	18	21	20	20	19	17	18	High	High	High	High	High	High	High
AN4871-T-p1	transcript=AN4871-T | gene=AN4871 | organism=Aspergillus_nidulans_FGSC_A4 | gene_product=Class V chitinase | transcript_product=Class V chitinase | location=ChrIII_A_nidulans_FGSC_A4:717651-719307(-) | protein_length=446 | sequence_SO=chromosome | SO=protein_coding | is_pseudo=false	45	2309	16	16	0	446	49.7	6.25	22817	213588	2362.03	0	144.759		1.5976e+08	3.1606e+08	3.96057e+08	3.00783e+08	2.51551e+08	4.09712e+08	3.52747e+08	5.26647e+08	6.55269e+08	1.5976e+08	2.90161e+08	2.67275e+08	1.64198e+08	1.03626e+08	1.74535e+08	2.00314e+08	2.87252e+08	3.03894e+08	14	14	13	14	13	13	13	13	14	High	High	High	High	High	High	High
AN8856-T-p1	transcript=AN8856-T | gene=AN8856 | organism=Aspergillus_nidulans_FGSC_A4 | gene_product=Ortholog(s) have RNA binding activity, role in ribosomal large subunit assembly and cytosolic large ribosomal subunit localization | transcript_product=Ortholog(s) have RNA binding activity, role in ribosomal large subunit assembly and cytosolic large ribosomal subunit localization | location=ChrIII_A_nidulan…	42	2289	8	8	0	153	16.8	10.42	12211	123233	586.91	0	71.473		6.35884e+08	4.40856e+08	3.50496e+08	5.23573e+08	4.46927e+08	3.34866e+08	7.77203e+08	7.63937e+08	6.34295e+08	6.35884e+08	4.04731e+08	2.36528e+08	2.8582e+08	1.84112e+08	1.42651e+08	4.4135e+08	4.16678e+08	2.94166e+08	9	9	9	8	8	8	8	9	9	High	High	High	High	High	High	High
AN7003-T-p1	transcript=AN7003-T | gene=AN7003 | organism=Aspergillus_nidulans_FGSC_A4 | gene_product=Ortholog(s) have cell surface, cytosolic large ribosomal subunit localization | transcript_product=Ortholog(s) have cell surface, cytosolic large ribosomal subunit localization | location=ChrIV_A_nidulans_FGSC_A4:1349604-1350698(+) | protein_length=226 | sequence_SO=chromosome | SO=protein_coding | is_pseudo=…	39	2281	10	10	0	226	25.6	10.55	11527	117068	801.63	0	47.22		8.00795e+08	6.57248e+08	6.23118e+08	1.07447e+09	8.14347e+08	9.95155e+08	8.8938e+08	5.96068e+08	6.095e+08	8.00795e+08	6.03391e+08	4.20504e+08	5.86553e+08	3.3547e+08	4.23931e+08	5.05052e+08	3.25116e+08	2.82667e+08	8	9	8	9	8	8	9	8	7	High	High	High	High	High	High	High
AN1638-T-p1	transcript=AN1638-T | gene=AN1638 | organism=Aspergillus_nidulans_FGSC_A4 | gene_product=Ortholog(s) have metalloaminopeptidase activity, serine-type peptidase activity, role in peptide catabolic process, proteolysis and cell wall-bounded periplasmic space, cytosol, fungal-type cell wall, glyoxysome, mitochondrion localization | transcript_product=Ortholog(s) have metalloaminopeptidase activity, …	37	2253	30	30	0	883	97.9	5.41	14394	143937	1350.36	0	167.306		4.40591e+08	3.37947e+08	3.22964e+08	5.06925e+08	4.61364e+08	5.54128e+08	2.68313e+08	3.75559e+08	4.00669e+08	4.40591e+08	3.10254e+08	2.17949e+08	2.76732e+08	1.90059e+08	2.36056e+08	1.52367e+08	2.04843e+08	1.85818e+08	24	24	23	28	23	26	23	24	22	High	High	High	High	High	High	High
AN1047-T-p1	transcript=AN1047-T | gene=AN1047 | organism=Aspergillus_nidulans_FGSC_A4 | gene_product=Putative heat shock protein | transcript_product=Putative heat shock protein | location=ChrVIII_A_nidulans_FGSC_A4:1683807-1686225(-) | protein_length=724 | sequence_SO=chromosome | SO=protein_coding | is_pseudo=false	46	2237	33	33	0	724	81.1	5.22	18973	185136	1775.8	0	256.632		3.25146e+08	2.66543e+08	2.9488e+08	4.4359e+08	4.78286e+08	5.03664e+08	3.86447e+08	4.05973e+08	5.4312e+08	3.25146e+08	2.44701e+08	1.98997e+08	2.42157e+08	1.9703e+08	2.14558e+08	2.19452e+08	2.21432e+08	2.51882e+08	30	27	28	31	31	30	27	27	27	High	High	High	High	High	High	High
AN8216-T-p1	transcript=AN8216-T | gene=AN8216 | organism=Aspergillus_nidulans_FGSC_A4 | gene_product=Putative nucleoside diphosphate kinase with a predicted role in phospholipid metabolism | transcript_product=Putative nucleoside diphosphate kinase with a predicted role in phospholipid metabolism | location=ChrII_A_nidulans_FGSC_A4:1171374-1172149(-) | protein_length=153 | sequence_SO=chromosome | SO=protein…	49	2237	7	7	0	153	16.9	8.12	17617	166763	1625.85	0	69.517		1.08302e+09	1.54175e+09	1.47894e+09	9.20385e+08	9.214e+08	7.78694e+08	9.94874e+08	1.00328e+09	1.30052e+09	1.08302e+09	1415414045	9.98046e+08	5.02441e+08	3.79571e+08	3.3172e+08	5.64959e+08	5.47224e+08	6.0314e+08	6	5	7	7	7	7	6	7	6	High	High	High	High	High	High	High
AN8605-T-p1	transcript=AN8605-T | gene=AN8605 | organism=Aspergillus_nidulans_FGSC_A4 | gene_product=Putative peptidyl-prolyl cis-trans isomerase (PPIase) | transcript_product=Putative peptidyl-prolyl cis-trans isomerase (PPIase) | location=ChrIII_A_nidulans_FGSC_A4:3389977-3390629(+) | protein_length=162 | sequence_SO=chromosome | SO=protein_coding | is_pseudo=false	62	2182	10	10	0	162	17.8	8.91	15481	138453	1199.1	0	107.895		2.00814e+09	1.82534e+09	1.65704e+09	1.63504e+09	1.40041e+09	1.47542e+09	1.08256e+09	8.12921e+08	9.57906e+08	2.00814e+09	1.67577e+09	1.11824e+09	8.92573e+08	5.76899e+08	6.28522e+08	6.14751e+08	4.43396e+08	4.44247e+08	11	11	12	12	12	12	10	11	11	High	High	High	High	High	High	High
AN7331-T-p1	transcript=AN7331-T | gene=AN7331 | organism=Aspergillus_nidulans_FGSC_A4 | gene_product=Has domain(s) with predicted DNA binding, cyanate hydratase activity and role in cyanate metabolic process | transcript_product=Has domain(s) with predicted DNA binding, cyanate hydratase activity and role in cyanate metabolic process | location=ChrIV_A_nidulans_FGSC_A4:287921-288451(+) | protein_length=142 |…	76	2166	10	10	0	142	15.9	5.55	24099	174115	1868.2	0	112.669		1.35173e+08	6.72439e+08	5.71874e+08	4.79899e+08	3.9481e+08	6.47753e+08	7.14764e+08	1.63869e+09	1.9035e+09	1.35173e+08	6.17337e+08	3.85923e+08	2.61978e+08	1.62642e+08	2.75939e+08	4.05893e+08	8.93797e+08	8.82785e+08	12	12	12	11	12	12	12	12	11	High	High	High	High	High	High	High
AN7657-T-p1	transcript=AN7657-T | gene=AN7657 | organism=Aspergillus_nidulans_FGSC_A4 | gene_product=Putative 1,3-beta-transglycosidase with a predicted role in glucan processing | transcript_product=Putative 1,3-beta-transglycosidase with a predicted role in glucan processing | location=ChrIV_A_nidulans_FGSC_A4:2286553-2287973(+) | protein_length=455 | sequence_SO=chromosome | SO=protein_coding | is_pseudo=…	46	2140	21	21	0	455	48.9	4.86	19284	174688	1784.36	0	214.93		6.70669e+08	8.39082e+08	9.52222e+08	7.79566e+08	7.99516e+08	6.85365e+08	6.70472e+08	6.46825e+08	7.08255e+08	6.70669e+08	7.70325e+08	6.42596e+08	4.25567e+08	3.29361e+08	2.91962e+08	3.80741e+08	3.52801e+08	3.28467e+08	18	18	16	20	19	19	18	19	18	High	High	High	High	High	High	High
AN7254-T-p1	transcript=AN7254-T | gene=AN7254 | organism=Aspergillus_nidulans_FGSC_A4 | gene_product=Protein with a conserved CDC48, cell division protein N-terminal domain and two ATPase domains of the AAA-superfamily | transcript_product=Protein with a conserved CDC48, cell division protein N-terminal domain and two ATPase domains of the AAA-superfamily | location=ChrIV_A_nidulans_FGSC_A4:520523-523263(+) …	51	2136	38	38	0	814	89.4	5.12	11517	138895	1472.54	0	250.676		4.34487e+08	5.2377e+08	5.30795e+08	5.74707e+08	5.70924e+08	4.69664e+08	4.13692e+08	5.95109e+08	5.6697e+08	4.34487e+08	4.80851e+08	3.58201e+08	3.13734e+08	2.35192e+08	2.00074e+08	2.34923e+08	3.24593e+08	2.62943e+08	34	36	35	38	38	37	36	34	35	High	High	High	High	High	High	High
AN4462-T-p1	transcript=AN4462-T | gene=AN4462 | organism=Aspergillus_nidulans_FGSC_A4 | gene_product=Putative pyruvate carboxylase or glutathione synthase | transcript_product=Putative pyruvate carboxylase or glutathione synthase | location=ChrIII_A_nidulans_FGSC_A4:1981759-1985403(+) | protein_length=1196 | sequence_SO=chromosome | SO=protein_coding | is_pseudo=false	29	2116	31	31	0	1196	131.3	6.65	17570	157509	1636.93	0	210.511		5.65921e+08	8.3221e+08	7.66435e+08	9.09525e+08	7.41466e+08	5.83e+08	5.58844e+08	7.4644e+08	6.85508e+08	5.65921e+08	7.64016e+08	5.1722e+08	4.96512e+08	3.05447e+08	2.48355e+08	3.1735e+08	4.07134e+08	3.17917e+08	24	27	28	28	30	28	27	26	28	High	High	High	High	High	High	High
AN2875-T-p1	transcript=AN2875-T | gene=AN2875 | organism=Aspergillus_nidulans_FGSC_A4 | gene_product=Putative fructose-bisphosphate aldolase with a predicted role in gluconeogenesis and glycolysis | transcript_product=Putative fructose-bisphosphate aldolase with a predicted role in gluconeogenesis and glycolysis | location=ChrVI_A_nidulans_FGSC_A4:2525793-2527031(-) | protein_length=360 | sequence_SO=chromos…	36	2079	15	15	0	360	39.5	6.06	16433	157178	1470.47	0	190.352		4.5128e+08	3.67584e+08	4.93384e+08	4.85964e+08	4.07239e+08	3.87622e+08	3.66146e+08	3.63399e+08	5.86143e+08	4.5128e+08	3.37463e+08	3.32955e+08	2.65289e+08	1.67762e+08	1.65125e+08	2.07923e+08	1.9821e+08	2.71835e+08	13	14	15	16	13	15	15	13	16	High	High	High	High	High	High	High
AN7107-T-p1	transcript=AN7107-T | gene=AN7107 | organism=Aspergillus_nidulans_FGSC_A4 | gene_product=Ortholog(s) have cell surface, nucleolus localization | transcript_product=Ortholog(s) have cell surface, nucleolus localization | location=ChrIV_A_nidulans_FGSC_A4:997470-999027(-) | protein_length=251 | sequence_SO=chromosome | SO=protein_coding | is_pseudo=false	48	2071	13	13	0	251	28.9	9.99	12592	139643	1475.13	0	92.229		1.29743e+09	8.33943e+08	5.75347e+08	1.15792e+09	8.13493e+08	6.2036e+08	5.49832e+08	8.94392e+08	1.14003e+09	1.29743e+09	7.65607e+08	3.88266e+08	6.32113e+08	3.35118e+08	2.6427e+08	3.12233e+08	4.87833e+08	5.28712e+08	11	12	11	11	13	11	12	11	11	High	High	High	High	High	High	High
AN3058-T-p1	transcript=AN3058-T | gene=AN3058 | organism=Aspergillus_nidulans_FGSC_A4 | gene_product=Putative glycine hydroxymethyltransferase with a predicted role in glycine, serine, and threonine metabolism | transcript_product=Putative glycine hydroxymethyltransferase with a predicted role in glycine, serine, and threonine metabolism | location=ChrVI_A_nidulans_FGSC_A4:1978635-1980267(+) | protein_length…	47	2061	21	20	1	471	51.7	7.75	13947	134420	1194.71	0	140.651		1.93125e+09	2.37683e+09	1.98505e+09	1.58718e+09	1.36593e+09	1.40936e+09	1.32899e+09	1.56847e+09	2.34606e+09	1.93125e+09	2.18207e+09	1.33958e+09	8.66446e+08	5.62696e+08	6.00381e+08	7.54696e+08	8.55498e+08	1.08803e+09	24	25	24	24	25	24	24	24	23	High	High	High	High	High	High	High
AN6679-T-p1	transcript=AN6679-T | gene=AN6679 | organism=Aspergillus_nidulans_FGSC_A4 | gene_product=Ortholog(s) have small ribosomal subunit rRNA binding, structural constituent of ribosome activity and role in maturation of SSU-rRNA from tricistronic rRNA transcript (SSU-rRNA, 5.8S rRNA, LSU-rRNA) | transcript_product=Ortholog(s) have small ribosomal subunit rRNA binding, structural constituent of ribosome…	57	2039	9	9	0	151	16.8	10.37	16516	141241	1539.89	0	55.956		7.13902e+08	6.74995e+08	6.7968e+08	6.53416e+08	5.60926e+08	7.52823e+08	8.407e+08	7.09386e+08	8.37346e+08	7.13902e+08	6.19684e+08	4.58674e+08	3.56701e+08	2.31073e+08	3.20699e+08	4.77408e+08	3.86924e+08	3.88336e+08	8	8	8	9	8	9	9	9	8	High	High	High	High	High	High	High
AN3459-T-p1	transcript=AN3459-T | gene=AN3459 | organism=Aspergillus_nidulans_FGSC_A4 | gene_product=Ortholog(s) have metallodipeptidase activity, omega peptidase activity, role in glutathione catabolic process and cytosol, mitochondrion, nucleus, ribosome localization | transcript_product=Ortholog(s) have metallodipeptidase activity, omega peptidase activity, role in glutathione catabolic process and cytoso…	46	1989	19	19	0	535	59.2	6.4	16692	148399	1507.86	0	203.964		2.88754e+08	2.5844e+08	2.72238e+08	3.15741e+08	2.66135e+08	2.671e+08	3.21028e+08	3.54334e+08	4.45517e+08	2.88754e+08	2.37262e+08	1.83717e+08	1.72364e+08	1.09634e+08	1.13783e+08	1.82302e+08	1.93266e+08	2.06617e+08	20	18	19	21	19	19	18	19	20	High	High	High	High	High	High	High
AN0733-T-p1	transcript=AN0733-T | gene=AN0733 | organism=Aspergillus_nidulans_FGSC_A4 | gene_product=Histone H3 | transcript_product=Histone H3 | location=ChrVIII_A_nidulans_FGSC_A4:2630459-2631015(+) | protein_length=136 | sequence_SO=chromosome | SO=protein_coding | is_pseudo=false	26	1972	5	5	0	136	15.3	11.15	12959	97161	654.13	0	18.065		1.65304e+09	9.85729e+08	1.14279e+09	8.68383e+08	1.01107e+09	1.39446e+09	7.59035e+08	1.53563e+09	8.62018e+08	1.65304e+09	9.04956e+08	7.71196e+08	4.74053e+08	4.16508e+08	5.94032e+08	4.31033e+08	8.37584e+08	3.99777e+08	4	4	4	5	5	4	5	4	4	High	High	High	High	High	High	High
AN4803-T-p1	transcript=AN4803-T | gene=AN4803 | organism=Aspergillus_nidulans_FGSC_A4 | gene_product=Ortholog(s) have rRNA binding, structural constituent of ribosome activity and role in maturation of SSU-rRNA from tricistronic rRNA transcript (SSU-rRNA, 5.8S rRNA, LSU-rRNA), positive regulation of translational fidelity | transcript_product=Ortholog(s) have rRNA binding, structural constituent of ribosome …	52	1969	13	13	0	193	22.2	10.1	10068	121669	1142.13	0	48.651		1.93398e+09	1.3884e+09	1.38305e+09	1.30256e+09	1.08617e+09	1.57072e+09	1.83432e+09	1.74014e+09	1.08014e+09	1.93398e+09	1.27463e+09	9.33332e+08	7.11071e+08	4.47446e+08	6.69117e+08	1.04166e+09	9.49135e+08	5.00934e+08	10	12	11	10	12	11	11	11	12	High	High	High	High	High	High	High
AN4695-T-p1	transcript=AN4695-T | gene=AN4695 | organism=Aspergillus_nidulans_FGSC_A4 | gene_product=Putative woronin body protein | transcript_product=Putative woronin body protein | location=ChrIII_A_nidulans_FGSC_A4:1290054-1290719(+) | protein_length=177 | sequence_SO=chromosome | SO=protein_coding | is_pseudo=false	64	1962	12	12	0	177	19.7	7.43	12678	125798	1077.39	0	69.986		2.60963e+09	3.10992e+09	2.75871e+09	1.97437e+09	1.84422e+09	1.93405e+09	1.95145e+09	1.79659e+09	2.2482e+09	2.60963e+09	2.85508e+09	1.86168e+09	1.07781e+09	7.59726e+08	8.23897e+08	1.10817e+09	9.79923e+08	1.04265e+09	10	10	10	12	11	10	9	10	8	High	High	High	High	High	High	High
AN2936-T-p1	transcript=AN2936-T | gene=AN2936 | organism=Aspergillus_nidulans_FGSC_A4 | gene_product=Putative Class 2C alpha-mannosidase with a predicted role in mannose polymer metabolism | transcript_product=Putative Class 2C alpha-mannosidase with a predicted role in mannose polymer metabolism | location=ChrVI_A_nidulans_FGSC_A4:2343393-2346882(+) | protein_length=1095 | sequence_SO=chromosome | SO=protei…	34	1959	33	33	0	1095	124	5.59	13097	138326	1324.15	0	229.846		9.13253e+08	3.84874e+08	3.406e+08	6.62058e+08	5.83469e+08	5.69202e+08	5.24981e+08	5.1808e+08	4.20949e+08	9.13253e+08	3.53336e+08	2.2985e+08	3.61419e+08	2.4036e+08	2.42477e+08	2.98121e+08	2.82579e+08	1.95223e+08	23	31	26	28	30	29	28	25	24	High	High	High	High	High	High	High
AN4087-T-p1	transcript=AN4087-T | gene=AN4087 | organism=Aspergillus_nidulans_FGSC_A4 | gene_product=Putative 40S ribosomal protein subunit | transcript_product=Putative 40S ribosomal protein subunit | location=ChrII_A_nidulans_FGSC_A4:2137935-2139058(+) | protein_length=264 | sequence_SO=chromosome | SO=protein_coding | is_pseudo=false	52	1946	16	16	0	264	28.9	8.94	18084	132365	1394.48	0	85.654		4.11634e+08	1.21395e+09	1.00225e+09	6.9889e+08	1.16516e+09	9.12271e+08	9.52229e+08	9.28514e+08	8.13244e+08	4.11634e+08	1114474615	6.76357e+08	3.81526e+08	4.79987e+08	3.88623e+08	5.40742e+08	5.06444e+08	3.77157e+08	13	14	14	15	17	16	14	13	14	High	High	High	High	High	High	High
AN1246-T-p1	transcript=AN1246-T | gene=AN1246 | organism=Aspergillus_nidulans_FGSC_A4 | gene_product=Putative phosphoglycerate kinase with a predicted role in gluconeogenesis and glycolysis | transcript_product=Putative phosphoglycerate kinase with a predicted role in gluconeogenesis and glycolysis | location=ChrVIII_A_nidulans_FGSC_A4:1063743-1065122(+) | protein_length=421 | sequence_SO=chromosome | SO=pro…	54	1939	21	21	0	421	44.9	6.83	14115	134373	1205.3	0	144.826		8.65486e+08	9.14491e+08	7.95263e+08	9.13025e+08	9.40011e+08	8.63899e+08	1.05706e+09	9.81841e+08	1.053e+09	8.65486e+08	8.39555e+08	5.36674e+08	4.98423e+08	3.87237e+08	3.68017e+08	6.00274e+08	5.35531e+08	4.88351e+08	21	20	18	21	20	21	19	19	19	High	High	High	High	High	High	High
AN6499-T-p1	transcript=AN6499-T | gene=AN6499 | organism=Aspergillus_nidulans_FGSC_A4 | gene_product=Putative malate dehydrogenase with a predicted role in the methylglyoxal bypass or the TCA cycle | transcript_product=Putative malate dehydrogenase with a predicted role in the methylglyoxal bypass or the TCA cycle | location=ChrI_A_nidulans_FGSC_A4:2297929-2299340(-) | protein_length=330 | sequence_SO=chromo…	50	1937	16	15	1	330	34.2	6.62	15297	131333	1296.15	0	93.659		2.22729e+09	3.37954e+09	2.73818e+09	2.38265e+09	2.37689e+09	1.64357e+09	2.43663e+09	2.50701e+09	2.66483e+09	2.22729e+09	3.10261e+09	1.84783e+09	1.3007e+09	9.79159e+08	7.00151e+08	1.38369e+09	1.36741e+09	1.23587e+09	16	13	15	15	16	16	14	14	14	High	High	High	High	High	High	High
AN3413-T-p1	transcript=AN3413-T | gene=AN3413 | organism=Aspergillus_nidulans_FGSC_A4 | gene_product=Protein with homology to ribosomal protein S2 and S5 | transcript_product=Protein with homology to ribosomal protein S2 and S5 | location=ChrVI_A_nidulans_FGSC_A4:798400-799430(-) | protein_length=259 | sequence_SO=chromosome | SO=protein_coding | is_pseudo=false	56	1922	13	13	0	259	28.2	10.52	11935	131093	1290.24	0	105.982		1.4197e+09	9.55261e+08	1.24729e+09	1.0113e+09	1.1916e+09	1.15678e+09	1.13356e+09	9.59176e+08	5.7375e+08	1.4197e+09	8.76984e+08	8.41721e+08	5.52071e+08	4.90879e+08	4.92783e+08	6.43714e+08	5.23168e+08	2.66088e+08	14	14	13	15	14	14	13	14	12	High	High	High	High	High	High	High
AN2436-T-p1	transcript=AN2436-T | gene=AN2436 | organism=Aspergillus_nidulans_FGSC_A4 | gene_product=Putative ATP citrate synthase with a predicted role in TCA intermediate metabolism | transcript_product=Putative ATP citrate synthase with a predicted role in TCA intermediate metabolism | location=ChrVII_A_nidulans_FGSC_A4:3947892-3950085(+) | protein_length=655 | sequence_SO=chromosome | SO=protein_coding |…	38	1909	19	19	0	655	71.5	8.05	13831	130198	1159.78	0	166.072		4.90371e+08	3.93934e+08	4.14822e+08	5.02387e+08	4.92798e+08	5.71946e+08	4.76718e+08	5.63327e+08	4.99728e+08	4.90371e+08	3.61654e+08	2.79938e+08	2.74255e+08	2.03008e+08	2.43646e+08	2.70714e+08	3.07258e+08	2.31759e+08	18	17	17	19	20	19	18	18	18	High	High	High	High	High	High	High
AN1964-T-p1	transcript=AN1964-T | gene=AN1964 | organism=Aspergillus_nidulans_FGSC_A4 | gene_product=Ortholog of S. cerevisiae RPS6B and RPS6A | transcript_product=Ortholog of S. cerevisiae RPS6B and RPS6A | location=ChrVII_A_nidulans_FGSC_A4:2404820-2405920(+) | protein_length=237 | sequence_SO=chromosome | SO=protein_coding | is_pseudo=false	46	1898	11	11	0	237	27.1	10.73	12909	136424	1218.4	0	76.056		7.86067e+08	1.03065e+09	9.07136e+08	7.35593e+08	7.61527e+08	6.5967e+08	7.92816e+08	6.18369e+08	8.55357e+08	7.86067e+08	9.46191e+08	6.1217e+08	4.01562e+08	3.13711e+08	2.81016e+08	4.50216e+08	3.3728e+08	3.96688e+08	11	12	11	12	12	12	11	11	10	High	High	High	High	High	High	High
AN7451-T-p1	transcript=AN7451-T | gene=AN7451 | organism=Aspergillus_nidulans_FGSC_A4 | gene_product=Putative NAD-glutamate dehydrogenase with a predicted role in glutamate and glutamine metabolism | transcript_product=Putative NAD-glutamate dehydrogenase with a predicted role in glutamate and glutamine metabolism | location=ChrIV_A_nidulans_FGSC_A4:1581218-1584683(-) | protein_length=1096 | sequence_SO=chro…	34	1854	30	30	0	1096	123.5	6.39	12526	132497	1213.53	0	197.555		4.92655e+08	2.64153e+08	3.3341e+08	3.19833e+08	3.74628e+08	3.81954e+08	4.80442e+08	5.99264e+08	4.49643e+08	4.92655e+08	2.42507e+08	2.24998e+08	1.74598e+08	1.54328e+08	1.62711e+08	2.72829e+08	3.2686e+08	2.0853e+08	24	28	24	24	25	27	25	23	22	High	High	High	High	High	High	High
AN7570-T-p1	transcript=AN7570-T | gene=AN7570 | organism=Aspergillus_nidulans_FGSC_A4 | gene_product=Alpha-tubulin, forms a heterodimer with beta-tubulin that promotes microtubule assembly | transcript_product=Alpha-tubulin, forms a heterodimer with beta-tubulin that promotes microtubule assembly | location=ChrIV_A_nidulans_FGSC_A4:1977747-1979601(-) | protein_length=451 | sequence_SO=chromosome | SO=protein…	51	1829	21	20	2	451	50	5.11	16552	129500	1207.02	0	153.08		7.42976e+08	8.95885e+08	7.08855e+08	6.34695e+08	5.89232e+08	6.5672e+08	8.11866e+08	6.8088e+08	8.38785e+08	7.42976e+08	8.22473e+08	4.78362e+08	3.46481e+08	2.42734e+08	2.79759e+08	4.61034e+08	3.71376e+08	3.89003e+08	19	18	19	22	20	19	20	18	18	High	High	High	High	High	High	High
AN6037-T-p1	transcript=AN6037-T | gene=AN6037 | organism=Aspergillus_nidulans_FGSC_A4 | gene_product=Putative glucose-6-phosphate isomerase with a predicted role in gluconeogenesis and glycolysis | transcript_product=Putative glucose-6-phosphate isomerase with a predicted role in gluconeogenesis and glycolysis | location=ChrI_A_nidulans_FGSC_A4:1440875-1442588(-) | protein_length=553 | sequence_SO=chromosome…	40	1823	19	19	0	553	61.2	6.46	13740	141970	1262.55	0	172.91		2.96838e+08	4.78968e+08	4.37814e+08	5.4228e+08	5.65544e+08	6.48801e+08	6.63033e+08	3.2448e+08	2.44577e+08	2.96838e+08	4.3972e+08	2.95453e+08	2.96032e+08	2.32976e+08	2.76386e+08	3.76516e+08	1.76983e+08	1.13427e+08	19	19	19	19	17	19	20	18	17	High	High	High	High	High	High	High
AN5626-T-p1	transcript=AN5626-T | gene=AN5626 | organism=Aspergillus_nidulans_FGSC_A4 | gene_product=Acetyl-CoA synthase, required for utilization of acetate as a carbon source | transcript_product=Acetyl-CoA synthase, required for utilization of acetate as a carbon source | location=ChrV_A_nidulans_FGSC_A4:2169930-2172227(-) | protein_length=670 | sequence_SO=chromosome | SO=protein_coding | is_pseudo=false	41	1802	29	29	0	670	74.2	6.47	9818	118579	1206	0	162.574		5.40622e+08	7.69377e+08	7.37565e+08	7.28055e+08	6.42655e+08	6.88753e+08	7.34387e+08	6.44121e+08	8.91502e+08	5.40622e+08	7.06332e+08	4.97737e+08	3.97447e+08	2.64742e+08	2.93405e+08	4.17036e+08	3.51326e+08	4.13451e+08	26	25	23	27	26	25	25	24	26	High	High	High	High	High	High	High
AN0747-T-p1	transcript=AN0747-T | gene=AN0747 | organism=Aspergillus_nidulans_FGSC_A4 | gene_product=Putative ubiquinol-cytochrome-c reductase subunit with a predicted role in energy metabolism | transcript_product=Putative ubiquinol-cytochrome-c reductase subunit with a predicted role in energy metabolism | location=ChrVIII_A_nidulans_FGSC_A4:2593352-2595003(-) | protein_length=479 | sequence_SO=chromosome …	35	1769	16	16	0	479	53.2	5.86	11602	121294	1159.9	0	105.327		7.72972e+08	8.01606e+08	6.73612e+08	7.85745e+08	8.63277e+08	6.40388e+08	8.04248e+08	9.38264e+08	7.09682e+08	7.72972e+08	7.3592e+08	4.54579e+08	4.28941e+08	3.55627e+08	2.72802e+08	4.56708e+08	5.11762e+08	3.29129e+08	18	19	19	19	17	18	18	18	17	High	High	High	High	High	High	High
AN1378-T-p1	transcript=AN1378-T | gene=AN1378 | organism=Aspergillus_nidulans_FGSC_A4 | gene_product=Ortholog of A. fumigatus Af293 : Afu1g09030, A. niger CBS 513.88 : An08g00540, A. oryzae RIB40 : AO090005001622, Aspergillus wentii : Aspwe1_0024518 and Aspergillus sydowii : Aspsy1_0138364 | transcript_product=Ortholog of A. fumigatus Af293 : Afu1g09030, A. niger CBS 513.88 : An08g00540, A. oryzae RIB40 : AO…	64	1768	15	15	0	192	21.7	8.43	9630	119819	1017.6	0	111.416	Acetyl [N-Term]	4.2752e+08	4.43725e+08	5.16302e+08	4.62705e+08	4.07963e+08	5.41101e+08	6.10119e+08	5.91965e+08	6.21363e+08	4.2752e+08	4.07364e+08	3.4842e+08	2.52592e+08	1.6806e+08	2.30506e+08	3.46468e+08	3.22879e+08	2.88169e+08	14	12	11	13	12	13	12	9	10	High	High	High	High	High	High	High
AN4872-T-p1	transcript=AN4872-T | gene=AN4872 | organism=Aspergillus_nidulans_FGSC_A4 | gene_product=Fusion protein consisting of N-terminal ubiquitin and C-terminal extension protein (CEP) of the small ribosomal subunit | transcript_product=Fusion protein consisting of N-terminal ubiquitin and C-terminal extension protein (CEP) of the small ribosomal subunit | location=ChrIII_A_nidulans_FGSC_A4:716807-71737…	31	1756	5	1	0	154	17.7	9.77	16278	138248	1213.88	0	43.481		2.56867e+07	8.15632e+06	1.85436e+07	3.31641e+07	4.3339e+07	2.94253e+07	5.15438e+07	3.89708e+07	3.61177e+07	2.56867e+07	7.48797e+06	1.25139e+07	1.81043e+07	1.78535e+07	1.2535e+07	2.92701e+07	2.1256e+07	1.67503e+07	1	1	1	1	1	1	1	1	1	High	High	High	High	High	High	High
AN6010-T-p1	transcript=AN6010-T | gene=AN6010 | organism=Aspergillus_nidulans_FGSC_A4 | gene_product=Hsp70-family protein | transcript_product=Hsp70-family protein | location=ChrI_A_nidulans_FGSC_A4:1518165-1520285(-) | protein_length=666 | sequence_SO=chromosome | SO=protein_coding | is_pseudo=false	36	1749	24	23	0	666	72.3	6.04	16216	146171	1527.63	0	188.517		8.66529e+08	6.48938e+08	6.80934e+08	7.4946e+08	8.26988e+08	7.98818e+08	6.49932e+08	5.51954e+08	1.06247e+09	8.66529e+08	5.95762e+08	4.5952e+08	4.09132e+08	3.40677e+08	3.40292e+08	3.69077e+08	3.01055e+08	4.92739e+08	17	18	17	18	21	19	19	17	16	High	High	High	High	High	High	High
AN0316-T-p1	transcript=AN0316-T | gene=AN0316 | organism=Aspergillus_nidulans_FGSC_A4 | gene_product=Alpha-tubulin, forms a heterodimer with beta-tubulin that promotes microtubule assembly | transcript_product=Alpha-tubulin, forms a heterodimer with beta-tubulin that promotes microtubule assembly | location=ChrVIII_A_nidulans_FGSC_A4:3934573-3936323(-) | protein_length=449 | sequence_SO=chromosome | SO=prote…	40	1713	15	14	0	449	50.3	5.03	11129	113250	954.91	0	127.066		1.28406e+09	2.56192e+09	2.6509e+09	2.46918e+09	2.29055e+09	2.36808e+09	2.75139e+09	1.70316e+09	1.68674e+09	1.28406e+09	2.35199e+09	1.78893e+09	1.34793e+09	9.43592e+08	1.00879e+09	1.56243e+09	9.28962e+08	7.82258e+08	14	15	14	16	15	15	14	15	13	High	High	High	High	High	High	High
AN8870-T-p1	transcript=AN8870-T | gene=AN8870 | organism=Aspergillus_nidulans_FGSC_A4 | gene_product=Expression increased in salt-adapted strains | transcript_product=Expression increased in salt-adapted strains | location=ChrIII_A_nidulans_FGSC_A4:2543164-2544176(-) | protein_length=256 | sequence_SO=chromosome | SO=protein_coding | is_pseudo=false	62	1680	16	16	0	256	29.1	10.04	12544	114842	985.72	0	116.872		1.43183e+09	1.22459e+09	1.39885e+09	1.12144e+09	1.05535e+09	1.00912e+09	1.0144e+09	1.2564e+09	1.09654e+09	1.43183e+09	1.12424e+09	9.43996e+08	6.12196e+08	4.34752e+08	4.29878e+08	5.76046e+08	6.85286e+08	5.08542e+08	17	17	17	18	18	16	18	17	15	High	High	High	High	High	High	High
AN10614-T-p1	transcript=AN10614-T | gene=AN10614 | organism=Aspergillus_nidulans_FGSC_A4 | gene_product=Ortholog(s) have G-quadruplex DNA binding, ribosome binding, telomeric DNA binding, triplex DNA binding activity | transcript_product=Ortholog(s) have G-quadruplex DNA binding, ribosome binding, telomeric DNA binding, triplex DNA binding activity | location=ChrIII_A_nidulans_FGSC_A4:615769-617170(-) | prote…	48	1669	18	18	0	296	32.6	9.47	9657	116092	1106.06	0	131.819		7.26944e+08	1.17057e+09	1.29358e+09	8.64283e+08	9.43508e+08	9.36221e+08	7.3545e+08	6.05114e+08	5.5961e+08	7.26944e+08	1.07465e+09	8.72958e+08	4.71814e+08	3.88678e+08	3.98825e+08	4.1764e+08	3.3005e+08	2.5953e+08	18	14	15	15	15	14	15	12	13	High	High	High	High	High	High	High
AN2999-T-p1	transcript=AN2999-T | gene=AN2999 | organism=Aspergillus_nidulans_FGSC_A4 | gene_product=isocitrate dehydrogenase (NADP+), putative | transcript_product=isocitrate dehydrogenase (NADP+), putative | location=ChrVI_A_nidulans_FGSC_A4:2137377-2139499(-) | protein_length=493 | sequence_SO=chromosome | SO=protein_coding | is_pseudo=false	42	1628	22	22	0	493	55.1	8.97	12877	112968	1072.38	0	103.047		4.09987e+08	3.85034e+08	4.55301e+08	5.76211e+08	3.61604e+08	2.81746e+08	3.6916e+08	3.87054e+08	3.3799e+08	4.09987e+08	3.53483e+08	3.07254e+08	3.14555e+08	1.48963e+08	1.20022e+08	2.09635e+08	2.11113e+08	1.56749e+08	17	17	16	18	16	16	17	18	18	High	High	High	High	High	High	High
AN2435-T-p1	transcript=AN2435-T | gene=AN2435 | organism=Aspergillus_nidulans_FGSC_A4 | gene_product=Putative ATP citrate synthase with a predicted role in TCA intermediate metabolism | transcript_product=Putative ATP citrate synthase with a predicted role in TCA intermediate metabolism | location=ChrVII_A_nidulans_FGSC_A4:3944457-3945971(-) | protein_length=485 | sequence_SO=chromosome | SO=protein_coding |…	44	1623	20	20	0	485	53	6.18	6803	113735	1105.26	0	137.061		8.96129e+08	7.56496e+08	8.43899e+08	9.00918e+08	9.80026e+08	1.00197e+09	1.21112e+09	1.18453e+09	4.89054e+08	8.96129e+08	6.94506e+08	5.69495e+08	4.91814e+08	4.03722e+08	4.26833e+08	6.87758e+08	6.46086e+08	2.26808e+08	18	19	18	17	16	17	20	18	18	High	High	High	High	High	High	High
AN5800-T-p1	transcript=AN5800-T | gene=AN5800 | organism=Aspergillus_nidulans_FGSC_A4 | gene_product=Ortholog(s) have cytosol localization | transcript_product=Ortholog(s) have cytosol localization | location=ChrI_A_nidulans_FGSC_A4:2204432-2205238(+) | protein_length=184 | sequence_SO=chromosome | SO=protein_coding | is_pseudo=false	51	1619	11	11	0	184	20.9	11.81	11362	112842	1124.4	0	68.685		8.08561e+08	3.71603e+08	4.51649e+08	4.36076e+08	5.81214e+08	7.11741e+08	5.25344e+08	7.33151e+08	8.1866e+08	8.08561e+08	3.41153e+08	3.0479e+08	2.38055e+08	2.39431e+08	3.03198e+08	2.98327e+08	3.99886e+08	3.79669e+08	9	10	9	10	9	10	10	10	9	High	High	High	High	High	High	High
AN6563-T-p1	transcript=AN6563-T | gene=AN6563 | organism=Aspergillus_nidulans_FGSC_A4 | gene_product=Putative translation elongation factor EF-1 gamma | transcript_product=Putative translation elongation factor EF-1 gamma | location=ChrI_A_nidulans_FGSC_A4:2466458-2468078(-) | protein_length=411 | sequence_SO=chromosome | SO=protein_coding | is_pseudo=false	37	1606	15	15	0	411	46.2	6.58	11954	117061	1156.38	0	147.206		1.23471e+09	8.20649e+08	8.3982e+08	8.49825e+08	8.61236e+08	6.63187e+08	8.49908e+08	9.73571e+08	8.98714e+08	1.23471e+09	7.53402e+08	5.66742e+08	4.63922e+08	3.54786e+08	2.82514e+08	4.82637e+08	5.3102e+08	4.16796e+08	14	13	12	14	13	13	13	13	14	High	High	High	High	High	High	High
AN4501-T-p1	transcript=AN4501-T | gene=AN4501 | organism=Aspergillus_nidulans_FGSC_A4 | gene_product=Putative 14-3-3 protein | transcript_product=Putative 14-3-3 protein | location=ChrIII_A_nidulans_FGSC_A4:1847737-1848751(-) | protein_length=261 | sequence_SO=chromosome | SO=protein_coding | is_pseudo=false	54	1601	15	13	0	261	29.1	4.79	13352	126850	1215.04	0	138.416		1.84843e+09	1.57617e+09	1.89221e+09	1.57844e+09	1.40178e+09	1.76653e+09	1.64341e+09	7.69604e+08	1.06115e+09	1.84843e+09	1.44701e+09	1.27694e+09	8.61673e+08	5.77463e+08	7.52535e+08	9.33244e+08	4.19769e+08	4.92127e+08	13	13	13	13	13	13	13	13	12	High	High	High	High	High	High	High
AN4390-T-p1	transcript=AN4390-T | gene=AN4390 | organism=Aspergillus_nidulans_FGSC_A4 | gene_product=Putative GPI-anchored protein with similarity to Saccharomyces cerevisiae Ecm33p | transcript_product=Putative GPI-anchored protein with similarity to Saccharomyces cerevisiae Ecm33p | location=ChrIII_A_nidulans_FGSC_A4:2176447-2177699(-) | protein_length=396 | sequence_SO=chromosome | SO=protein_coding | is_…	19	1586	6	6	0	396	41	4.45	19218	119882	1330	0	35.282		1.10723e+09	7.28311e+08	8.40538e+08	4.78553e+08	5.69825e+08	6.23783e+08	5.46412e+08	6.98762e+08	5.77553e+08	1.10723e+09	6.68631e+08	5.67227e+08	2.61243e+08	2.34739e+08	2.65728e+08	3.10291e+08	3.81129e+08	2.67852e+08	4	5	5	5	5	5	4	5	5	High	High	High	High	High	High	High
AN1222-T-p1	transcript=AN1222-T | gene=AN1222 | organism=Aspergillus_nidulans_FGSC_A4 | gene_product=Putative S-adenosylmethionine synthetase | transcript_product=Putative S-adenosylmethionine synthetase | location=ChrVIII_A_nidulans_FGSC_A4:1146168-1147445(+) | protein_length=388 | sequence_SO=chromosome | SO=protein_coding | is_pseudo=false	34	1576	13	13	0	388	42.2	5.5	11938	107950	1099.55	0	83.797		6.66742e+08	8.40736e+08	6.03249e+08	6.58961e+08	6.69586e+08	7.04006e+08	7.74011e+08	7.98431e+08	6.24586e+08	6.66742e+08	7.71844e+08	4.07095e+08	3.59729e+08	2.75836e+08	2.99903e+08	4.39537e+08	4.35492e+08	2.89664e+08	12	12	12	14	13	13	13	13	13	High	High	High	High	High	High	High
AN1122-T-p1	transcript=AN1122-T | gene=AN1122 | organism=Aspergillus_nidulans_FGSC_A4 | gene_product=Ortholog(s) have cytosolic large ribosomal subunit, preribosome, large subunit precursor localization | transcript_product=Ortholog(s) have cytosolic large ribosomal subunit, preribosome, large subunit precursor localization | location=ChrVIII_A_nidulans_FGSC_A4:1450792-1451666(+) | protein_length=217 | seque…	30	1570	7	7	0	217	24.2	9.92	8231	105981	846.05	0	92.154		6.29757e+08	3.32395e+08	4.54558e+08	4.61173e+08	5.08225e+08	4.89253e+08	4.97792e+08	7.45952e+08	5.06495e+08	6.29757e+08	3.05158e+08	3.06753e+08	2.51756e+08	2.09363e+08	2.08419e+08	2.82681e+08	4.06868e+08	2.34897e+08	8	8	6	7	7	6	7	7	6	High	High	High	High	High	High	High
AN4794-T-p1	transcript=AN4794-T | gene=AN4794 | organism=Aspergillus_nidulans_FGSC_A4 | gene_product=Putative ribosomal protein | transcript_product=Putative ribosomal protein | location=ChrIII_A_nidulans_FGSC_A4:970226-971445(-) | protein_length=261 | sequence_SO=chromosome | SO=protein_coding | is_pseudo=false	56	1542	15	15	0	261	29.4	9.96	9620	98211.3	803.92	0	113.081		1.52935e+09	2.32903e+09	2.17302e+09	1.61845e+09	1.54439e+09	1.79026e+09	1.6379e+09	1.77163e+09	1.17233e+09	1.52935e+09	2.13818e+09	1.46644e+09	8.83517e+08	6.36212e+08	7.62642e+08	9.30116e+08	9.66307e+08	5.43691e+08	13	16	15	15	15	16	16	16	16	High	High	High	High	High	High	High
AN5441-T-p1	transcript=AN5441-T | gene=AN5441 | organism=Aspergillus_nidulans_FGSC_A4 | gene_product=Ortholog(s) have role in endonucleolytic cleavage in ITS1 to separate SSU-rRNA from 5.8S rRNA and LSU-rRNA from tricistronic rRNA transcript (SSU-rRNA, 5.8S rRNA, LSU-rRNA), rRNA export from nucleus | transcript_product=Ortholog(s) have role in endonucleolytic cleavage in ITS1 to separate SSU-rRNA from 5.8S r…	57	1541	15	15	0	155	18	10.26	11141	109621	1086.8	0	75.903	Acetyl [N-Term]	7.34278e+08	1.68621e+09	1.44285e+09	1.56421e+09	1.44354e+09	1.4427e+09	1.60588e+09	1.42777e+09	1.30844e+09	7.34278e+08	1.54804e+09	9.73689e+08	8.53908e+08	5.94666e+08	6.14583e+08	9.11929e+08	7.78755e+08	6.06812e+08	15	15	14	15	15	15	15	14	14	High	High	High	High	High	High	High
AN10740-T-p1	transcript=AN10740-T | gene=AN10740 | organism=Aspergillus_nidulans_FGSC_A4 | gene_product=Ortholog(s) have cell surface, cytosolic large ribosomal subunit, preribosome, large subunit precursor localization | transcript_product=Ortholog(s) have cell surface, cytosolic large ribosomal subunit, preribosome, large subunit precursor localization | location=ChrI_A_nidulans_FGSC_A4:2066709-2067543(-) |…	47	1515	10	10	0	190	22.4	11.5	8312	75659.5	457.51	0	80.253		1.78219e+09	7.89579e+08	5.62225e+08	9.81429e+08	9.23916e+08	1.03554e+09	6.42661e+08	4.84791e+08	4.61142e+08	1.78219e+09	7.24879e+08	3.79411e+08	5.35765e+08	3.80607e+08	4.41133e+08	3.64948e+08	2.64422e+08	2.13864e+08	10	10	10	12	10	11	11	11	10	High	High	High	High	High	High	High
AN7710-T-p1	transcript=AN7710-T | gene=AN7710 | organism=Aspergillus_nidulans_FGSC_A4 | gene_product=Ortholog(s) have intracellular localization | transcript_product=Ortholog(s) have intracellular localization | location=ChrIV_A_nidulans_FGSC_A4:2449153-2449971(+) | protein_length=251 | sequence_SO=chromosome | SO=protein_coding | is_pseudo=false	50	1507	16	16	0	251	28	5.11	13455	118448	1113.51	0	113.446		8.21428e+08	4.19247e+08	5.58921e+08	4.32789e+08	4.8943e+08	3.91389e+08	5.09849e+08	4.86883e+08	3.64832e+08	8.21428e+08	3.84892e+08	3.77182e+08	2.36261e+08	2.0162e+08	1.6673e+08	2.89528e+08	2.65563e+08	1.69198e+08	13	14	13	15	15	13	12	14	13	High	High	High	High	High	High	High
AN8009-T-p1	transcript=AN8009-T | gene=AN8009 | organism=Aspergillus_nidulans_FGSC_A4 | gene_product=Ortholog of A. fumigatus nmt1 and S. cerevisiae THI13 | transcript_product=Ortholog of A. fumigatus nmt1 and S. cerevisiae THI13 | location=ChrII_A_nidulans_FGSC_A4:488131-489265(-) | protein_length=341 | sequence_SO=chromosome | SO=protein_coding | is_pseudo=false	51	1488	14	14	0	341	38.2	6.02	12245	113447	1087.12	0	112.096		6.31336e+08	5.1511e+08	5.16105e+08	2.68282e+08	4.71135e+08	4.54379e+08	4.81711e+08	3.34748e+08	4.47796e+08	6.31336e+08	472900720	3.48288e+08	1.46456e+08	1.94084e+08	1.93563e+08	2.73549e+08	1.82583e+08	2.07674e+08	14	13	12	16	15	15	15	14	14	High	High	High	High	High	High	High
AN8782-T-p1	transcript=AN8782-T | gene=AN8782 | organism=Aspergillus_nidulans_FGSC_A4 | gene_product=Putative S-formylglutathione hydrolase with a predicted role in pyruvate metabolism | transcript_product=Putative S-formylglutathione hydrolase with a predicted role in pyruvate metabolism | location=ChrIII_A_nidulans_FGSC_A4:2819709-2820700(+) | protein_length=288 | sequence_SO=chromosome | SO=protein_coding…	39	1474	12	12	0	288	31.5	6.93	8582	101163	1057.51	0	90.321		1.00725e+09	7.99061e+08	4.08768e+08	9.40919e+08	7.97995e+08	5.48611e+08	8.28212e+08	3.13803e+08	3.84096e+08	1.00725e+09	7.33583e+08	2.75852e+08	5.1365e+08	3.28734e+08	2.33705e+08	4.70316e+08	1.71159e+08	1.78132e+08	11	12	12	12	12	12	11	12	12	High	High	High	High	High	High	High
AN1013-T-p1	transcript=AN1013-T | gene=AN1013 | organism=Aspergillus_nidulans_FGSC_A4 | gene_product=Putative 60S Ribosomal protein L5 | transcript_product=Putative 60S Ribosomal protein L5 | location=ChrVIII_A_nidulans_FGSC_A4:1808637-1809758(-) | protein_length=301 | sequence_SO=chromosome | SO=protein_coding | is_pseudo=false	26	1462	5	5	0	301	34.4	8.68	14178	116634	1247.67	0	73.274		8.84681e+07	2.61338e+08	2.36105e+08	2.75243e+08	2.8262e+08	2.15302e+08	2.26023e+08	2.23237e+08	2.20374e+08	8.84681e+07	2.39923e+08	1.59333e+08	1.50256e+08	1.16425e+08	9.17173e+07	1.28352e+08	1.21761e+08	1.02203e+08	4	5	5	6	5	5	4	4	5	High	High	High	High	High	High	High
AN6014-T-p1	transcript=AN6014-T | gene=AN6014 | organism=Aspergillus_nidulans_FGSC_A4 | gene_product=Putative long-chain-fatty-acid-CoA ligase with a predicted role in fatty acid metabolism | transcript_product=Putative long-chain-fatty-acid-CoA ligase with a predicted role in fatty acid metabolism | location=ChrI_A_nidulans_FGSC_A4:1508454-1510775(-) | protein_length=698 | sequence_SO=chromosome | SO=protei…	27	1455	18	18	0	698	76.7	7.77	12698	130449	1319.52	0	176.04		2.92854e+08	2.13076e+08	2.43944e+08	2.93301e+08	1.63726e+08	2.66825e+08	3.0049e+08	4.7782e+08	2.71733e+08	2.92854e+08	1.95615e+08	1.64623e+08	1.60114e+08	6.74469e+07	1.13666e+08	1.70639e+08	2.6062e+08	1.26021e+08	15	14	16	16	13	12	15	14	12	High	High	High	High	High	High	High
AN10416-T-p1	transcript=AN10416-T | gene=AN10416 | organism=Aspergillus_nidulans_FGSC_A4 | gene_product=Putative 60s ribosomal protein similar to subunits L15 and L27 | transcript_product=Putative 60s ribosomal protein similar to subunits L15 and L27 | location=ChrVI_A_nidulans_FGSC_A4:697009-697793(+) | protein_length=149 | sequence_SO=chromosome | SO=protein_coding | is_pseudo=false	61	1450	10	10	0	149	16.7	10.37	8761	106460	1100.78	0	78.078		2.45464e+08	4.07371e+08	2.53635e+08	2.87883e+08	2.33513e+08	2.90173e+08	3.42975e+08	4.26545e+08	5.37902e+08	2.45464e+08	3.7399e+08	1.71163e+08	1.57156e+08	9.61957e+07	1.23612e+08	1.94765e+08	2.32653e+08	2.49463e+08	11	10	10	11	10	11	11	11	10	High	High	High	High	High	High	High
AN3954-T-p1	transcript=AN3954-T | gene=AN3954 | organism=Aspergillus_nidulans_FGSC_A4 | gene_product=Putative phosphogluconate dehydrogenase (decarboxylating) with a predicted role in the pentose-phosphate shunt | transcript_product=Putative phosphogluconate dehydrogenase (decarboxylating) with a predicted role in the pentose-phosphate shunt | location=ChrII_A_nidulans_FGSC_A4:2522457-2524428(-) | protein_le…	39	1433	14	14	0	490	54	6.28	10701	110835	851.29	0	118.097		6.97162e+08	7.34435e+08	8.11799e+08	9.45084e+08	9.67625e+08	8.87258e+08	8.93835e+08	5.65943e+08	7.02151e+08	6.97162e+08	6.74253e+08	5.47833e+08	5.15924e+08	3.98613e+08	3.77967e+08	5.07582e+08	3.08685e+08	3.25636e+08	13	10	13	14	13	13	13	10	12	High	High	High	High	High	High	High
AN5520-T-p1	transcript=AN5520-T | gene=AN5520 | organism=Aspergillus_nidulans_FGSC_A4 | gene_product=Ortholog(s) have role in maturation of LSU-rRNA and cytosolic large ribosomal subunit localization | transcript_product=Ortholog(s) have role in maturation of LSU-rRNA and cytosolic large ribosomal subunit localization | location=ChrV_A_nidulans_FGSC_A4:2530236-2531411(-) | protein_length=264 | sequence_SO=ch…	44	1424	16	16	0	264	29.4	10.29	10817	107755	1086.02	0	97.758		8.70565e+08	8.18368e+08	5.52087e+08	7.45978e+08	7.56376e+08	1.22344e+09	7.52416e+08	5.66749e+08	5.49683e+08	8.70565e+08	7.51309e+08	3.7257e+08	4.07231e+08	3.11589e+08	5.21179e+08	4.27274e+08	3.09125e+08	2.54926e+08	15	13	12	16	14	15	15	13	14	High	High	High	High	High	High	High
AN2526-T-p1	transcript=AN2526-T | gene=AN2526 | organism=Aspergillus_nidulans_FGSC_A4 | gene_product=Putative ketol-acid reductoisomerase with a predicted role in Coenzyme A and pantothenate biosynthesis or amino acid metabolism | transcript_product=Putative ketol-acid reductoisomerase with a predicted role in Coenzyme A and pantothenate biosynthesis or amino acid metabolism | location=ChrVII_A_nidulans_FGSC…	48	1398	17	17	0	400	44.3	8.87	12565	112347	1144.83	0	139.74		3.10159e+08	3.71819e+08	3.36932e+08	3.36728e+08	2.74012e+08	3.64947e+08	3.80817e+08	3.73485e+08	3.66394e+08	3.10159e+08	3.41351e+08	2.27375e+08	1.83821e+08	1.12879e+08	1.55466e+08	2.16254e+08	2.03712e+08	1.69922e+08	13	14	14	14	12	13	13	13	13	High	High	High	High	High	High	High
AN1263-T-p1	transcript=AN1263-T | gene=AN1263 | organism=Aspergillus_nidulans_FGSC_A4 | gene_product=Putative adenosylhomocysteinase with a predicted role in methionine metabolism | transcript_product=Putative adenosylhomocysteinase with a predicted role in methionine metabolism | location=ChrVIII_A_nidulans_FGSC_A4:1014531-1016078(-) | protein_length=449 | sequence_SO=chromosome | SO=protein_coding | is_pse…	44	1389	19	19	0	449	48.8	6.47	10050	94360.4	929.09	0	124.177		9.61126e+08	1.50812e+09	1.08024e+09	8.75208e+08	6.55085e+08	6.64991e+08	6.24361e+08	6.26335e+08	5.93951e+08	9.61126e+08	1.38454e+09	7.28988e+08	4.77778e+08	2.69862e+08	2.83283e+08	3.54556e+08	3.41625e+08	2.75456e+08	15	17	15	19	17	18	17	17	14	High	High	High	High	High	High	High
AN1543-T-p1	transcript=AN1543-T | gene=AN1543 | organism=Aspergillus_nidulans_FGSC_A4 | gene_product=Putative succinate dehydrogenase | transcript_product=Putative succinate dehydrogenase | location=ChrVII_A_nidulans_FGSC_A4:1115161-1117337(+) | protein_length=627 | sequence_SO=chromosome | SO=protein_coding | is_pseudo=false	34	1359	20	20	0	627	67.7	7.08	8922	94803.5	831.53	0	136.513		3.1779e+08	3.8254e+08	3.36861e+08	3.79277e+08	3.37121e+08	3.17627e+08	2.88743e+08	3.37575e+08	2.88099e+08	3.1779e+08	3.51193e+08	2.27327e+08	2.07048e+08	1.38877e+08	1.35308e+08	1.63968e+08	1.84125e+08	1.33611e+08	15	19	18	16	18	19	18	17	18	High	High	High	High	High	High	High
AN5803-T-p1	transcript=AN5803-T | gene=AN5803 | organism=Aspergillus_nidulans_FGSC_A4 | gene_product=Predicted fimbrin protein | transcript_product=Predicted fimbrin protein | location=ChrI_A_nidulans_FGSC_A4:2196450-2198683(+) | protein_length=640 | sequence_SO=chromosome | SO=protein_coding | is_pseudo=false	29	1358	20	20	0	640	71.8	6.07	11229	99724.5	942.31	0	121.854		4.25746e+08	4.54278e+08	4.76402e+08	4.11402e+08	5.01467e+08	3.44041e+08	4.1949e+08	4.96755e+08	5.4761e+08	4.25746e+08	4.17053e+08	3.21494e+08	2.24585e+08	2.06579e+08	1.4656e+08	2.38216e+08	2.70948e+08	253964755	18	18	17	16	17	16	17	17	19	High	High	High	High	High	High	High
AN1015-T-p1	transcript=AN1015-T | gene=AN1015 | organism=Aspergillus_nidulans_FGSC_A4 | gene_product=Putative phosphorylase with a predicted role in glycogen degradation | transcript_product=Putative phosphorylase with a predicted role in glycogen degradation | location=ChrVIII_A_nidulans_FGSC_A4:1796219-1799301(+) | protein_length=879 | sequence_SO=chromosome | SO=protein_coding | is_pseudo=false	36	1346	29	29	0	879	100.2	5.77	7838	86417.4	802.82	0	155.65		6.45766e+08	3.49862e+08	3.90322e+08	4.36038e+08	4.58432e+08	3.74393e+08	2.91117e+08	5.94061e+08	2.78069e+08	6.45766e+08	3.21193e+08	2.63404e+08	2.38034e+08	1.88851e+08	1.59489e+08	1.65317e+08	3.24022e+08	1.2896e+08	22	22	20	22	21	24	21	22	20	High	High	High	High	High	High	High
AN5960-T-p1	transcript=AN5960-T | gene=AN5960 | organism=Aspergillus_nidulans_FGSC_A4 | gene_product=Ortholog(s) have mRNA binding activity and role in maturation of SSU-rRNA from tricistronic rRNA transcript (SSU-rRNA, 5.8S rRNA, LSU-rRNA), ribosomal small subunit assembly | transcript_product=Ortholog(s) have mRNA binding activity and role in maturation of SSU-rRNA from tricistronic rRNA transcript (SSU-rR…	68	1328	10	10	0	149	15.7	10.71	12736	100437	961.66	0	87.333		1.42145e+09	1.65014e+09	2.07184e+09	1.64834e+09	1.71442e+09	1.63843e+09	1.59272e+09	1.13376e+09	1.14469e+09	1.42145e+09	1.51492e+09	1.39815e+09	8.99834e+08	7.06256e+08	6.97963e+08	9.04456e+08	6.18393e+08	5.30871e+08	8	9	8	8	7	9	8	7	8	High	High	High	High	High	High	High
AN1182-T-p1	transcript=AN1182-T | gene=AN1182 | organism=Aspergillus_nidulans_FGSC_A4 | gene_product=Beta-tubulin, highly conserved component of microtubules | transcript_product=Beta-tubulin, highly conserved component of microtubules | location=ChrVIII_A_nidulans_FGSC_A4:1268188-1270053(+) | protein_length=447 | sequence_SO=chromosome | SO=protein_coding | is_pseudo=false	36	1328	14	9	5	447	49.8	4.89	13065	102786	889.66	0	116.025		7.06399e+08	4.10349e+08	3.21027e+08	4.08363e+08	4.0747e+08	2.72638e+08	3.64561e+08	4.55554e+08	6.17043e+08	7.06399e+08	3.76724e+08	2.16641e+08	2.22926e+08	1.67857e+08	1.16142e+08	2.07023e+08	2.48475e+08	2.86165e+08	15	15	14	16	13	14	14	14	15	High	High	High	High	High	High	High
AN2275-T-p1	transcript=AN2275-T | gene=AN2275 | organism=Aspergillus_nidulans_FGSC_A4 | gene_product=Ortholog(s) have structural constituent of ribosome activity, role in cytoplasmic translation and cytosolic large ribosomal subunit, nucleus, preribosome, large subunit precursor localization | transcript_product=Ortholog(s) have structural constituent of ribosome activity, role in cytoplasmic translation and…	52	1327	11	11	0	254	27.5	10.98	6363	80522.9	833.8	0	86.711		7.5439e+08	1.66654e+09	1.9305e+09	1.90411e+09	1.62618e+09	1.40672e+09	1.12355e+09	1.39039e+09	6.61635e+08	7.5439e+08	1.52998e+09	1.30278e+09	1.03946e+09	6.69904e+08	5.99258e+08	6.38029e+08	7.5837e+08	3.06846e+08	12	13	12	12	11	11	11	12	11	High	High	High	High	High	High	High
AN5571-T-p1	transcript=AN5571-T | gene=AN5571 | organism=Aspergillus_nidulans_FGSC_A4 | gene_product=Putative oxoglutarate dehydrogenase (lipoamide) with a predicted role in the TCA cycle | transcript_product=Putative oxoglutarate dehydrogenase (lipoamide) with a predicted role in the TCA cycle | location=ChrV_A_nidulans_FGSC_A4:2371596-2374906(+) | protein_length=1048 | sequence_SO=chromosome | SO=protein_c…	27	1326	20	20	0	1048	117.9	6.84	6086	82144.5	741.87	0	132.633		1.4397e+08	1.19802e+08	1.5859e+08	1.33793e+08	9.26823e+07	1.36604e+08	1.30289e+08	1.27823e+08	1.61572e+08	1.4397e+08	1.09985e+08	1.07022e+08	7.30382e+07	3.81804e+07	5.81925e+07	7.39871e+07	6.97189e+07	7.49323e+07	15	15	15	13	12	14	15	14	16	High	High	High	High	High	High	High
AN9465-T-p1	transcript=AN9465-T | gene=AN9465 | organism=Aspergillus_nidulans_FGSC_A4 | gene_product=Ortholog(s) have structural constituent of ribosome activity, role in cytoplasmic translation and cytosolic large ribosomal subunit, nucleus localization | transcript_product=Ortholog(s) have structural constituent of ribosome activity, role in cytoplasmic translation and cytosolic large ribosomal subunit, nu…	54	1324	11	11	0	192	21.8	9.5	14617	102944	1018.11	0	83.632		7.69814e+08	1.32053e+09	1.49381e+09	1.00723e+09	9.72877e+08	9.93151e+08	1.11139e+09	9.37856e+08	8.08676e+08	7.69814e+08	1.21232e+09	1.00808e+09	5.49852e+08	4.00776e+08	4.23077e+08	6.31127e+08	5.11539e+08	3.75039e+08	9	7	8	9	7	8	9	7	7	High	High	High	High	High	High	High
AN6629-T-p1	transcript=AN6629-T | gene=AN6629 | organism=Aspergillus_nidulans_FGSC_A4 | gene_product=Putative ribosomal protein L14 | transcript_product=Putative ribosomal protein L14 | location=ChrI_A_nidulans_FGSC_A4:2678253-2678907(+) | protein_length=149 | sequence_SO=chromosome | SO=protein_coding | is_pseudo=false	54	1321	11	11	0	149	16.7	10.73	7738	77523.1	635.3	0	68.096		1.19058e+09	8.38631e+08	7.8636e+08	8.70441e+08	7.55222e+08	9.12532e+08	1.02626e+09	1.29634e+09	6.91044e+08	1.19058e+09	7.69911e+08	5.30665e+08	4.75176e+08	3.11113e+08	3.88734e+08	5.82784e+08	7.07067e+08	3.20485e+08	11	10	10	11	9	9	10	10	10	High	High	High	High	High	High	High
AN10351-T-p1	transcript=AN10351-T | gene=AN10351 | organism=Aspergillus_nidulans_FGSC_A4 | gene_product=Ortholog(s) have metalloaminopeptidase activity, role in cellular response to drug, chaperone-mediated protein folding, proteolysis and cytosol, fungal-type vacuole lumen, ribosome localization | transcript_product=Ortholog(s) have metalloaminopeptidase activity, role in cellular response to drug, chaperone…	55	1315	21	21	0	497	54	6	12932	102076	998.19	0	169.088		3.07723e+08	2.16443e+08	1.59513e+08	2.73258e+08	2.66267e+08	2.32662e+08	2.11457e+08	2.78202e+08	2.24099e+08	3.07723e+08	1.98707e+08	1.07645e+08	1.49172e+08	1.09689e+08	9.91127e+07	1.2008e+08	1.51741e+08	1.0393e+08	18	16	16	19	18	16	16	16	15	High	High	High	High	High	High	High
AN2932-T-p1	transcript=AN2932-T | gene=AN2932 | organism=Aspergillus_nidulans_FGSC_A4 | gene_product=Putative eukaryotic initiation factor 4A | transcript_product=Putative eukaryotic initiation factor 4A | location=ChrVI_A_nidulans_FGSC_A4:2351881-2353395(+) | protein_length=398 | sequence_SO=chromosome | SO=protein_coding | is_pseudo=false	32	1314	14	13	1	398	44.9	5.24	7910	86675.3	897.36	0	81.609		5.3299e+08	7.23885e+08	6.38161e+08	3.4879e+08	3.04179e+08	3.06329e+08	2.59492e+08	6.86855e+08	6.52112e+08	5.3299e+08	6.64568e+08	4.30655e+08	1.90405e+08	1.25307e+08	1.30495e+08	1.47357e+08	3.74635e+08	3.0243e+08	12	15	15	15	14	15	14	14	11	High	High	High	High	High	High	High
AN8777-T-p1	transcript=AN8777-T | gene=AN8777 | organism=Aspergillus_nidulans_FGSC_A4 | gene_product=Acetamidase, produces ammonium and acetate from acetamide, allowing utilization of acetamide as sole carbon or nitrogen source | transcript_product=Acetamidase, produces ammonium and acetate from acetamide, allowing utilization of acetamide as sole carbon or nitrogen source | location=ChrIII_A_nidulans_FGSC_A…	59	1307	25	25	0	548	60.2	6.24	8726	86303.9	786.72	0	154.634		1.83433e+08	3.17603e+08	3.82351e+08	3.01267e+08	3.33215e+08	3.17003e+08	4.10562e+08	2.48596e+08	2.55872e+08	1.83433e+08	2.91578e+08	2.58025e+08	1.64462e+08	1.37268e+08	1.35042e+08	2.33146e+08	1.35593e+08	1.18665e+08	19	19	18	21	21	19	18	18	20	High	High	High	High	High	High	High
AN4667-T-p1	transcript=AN4667-T | gene=AN4667 | organism=Aspergillus_nidulans_FGSC_A4 | gene_product=Septin, involved in development | transcript_product=Septin, involved in development | location=ChrIII_A_nidulans_FGSC_A4:1368340-1369894(-) | protein_length=379 | sequence_SO=chromosome | SO=protein_coding | is_pseudo=false	42	1299	14	14	0	379	43.1	5.1	10140	96906.1	898.37	0	114.503	Acetyl [N-Term]	2.96233e+08	2.22805e+08	2.44277e+08	2.6179e+08	2.71322e+08	2.33307e+08	2.35602e+08	3.11283e+08	2.60327e+08	2.96233e+08	2.04548e+08	1.64847e+08	1.42912e+08	1.11771e+08	9.93876e+07	1.33791e+08	1.69785e+08	1.20732e+08	11	12	11	12	13	11	12	11	11	High	High	High	High	High	High	High
AN2828-T-p1	transcript=AN2828-T | gene=AN2828 | organism=Aspergillus_nidulans_FGSC_A4 | gene_product=beta-glucosidase, putative | transcript_product=beta-glucosidase, putative | location=ChrVI_A_nidulans_FGSC_A4:2665365-2667834(+) | protein_length=737 | sequence_SO=chromosome | SO=protein_coding | is_pseudo=false	25	1289	14	14	0	737	77.8	4.77	8825	93841.2	984.59	0	122.042		2.46606e+08	2.73597e+08	3.34337e+08	2.96479e+08	3.08655e+08	3.53278e+08	2.71043e+08	2.95792e+08	4.31746e+08	2.46606e+08	2.51178e+08	2.25623e+08	1.61849e+08	1.2715e+08	1.50494e+08	1.53917e+08	1.61336e+08	2.00231e+08	14	13	15	15	14	15	13	13	14	High	High	High	High	High	High	High
AN3468-T-p1	transcript=AN3468-T | gene=AN3468 | organism=Aspergillus_nidulans_FGSC_A4 | gene_product=Histone H2A | transcript_product=Histone H2A | location=ChrVI_A_nidulans_FGSC_A4:632619-633175(+) | protein_length=132 | sequence_SO=chromosome | SO=protein_coding | is_pseudo=false	40	1264	6	5	1	132	14	10.55	7429	86156.9	888.55	0	29.343		6.05162e+08	1.39091e+09	1.52093e+09	7.68059e+08	1.15999e+09	8.66872e+08	5.12918e+08	1.64173e+09	1.30046e+09	6.05162e+08	1.27693e+09	1.02638e+09	4.19286e+08	4.77859e+08	3.69283e+08	2.91271e+08	8.95456e+08	6.03114e+08	5	3	3	4	4	5	5	3	3	High	High	High	High	High	High	High
AN9149-T-p1	transcript=AN9149-T | gene=AN9149 | organism=Aspergillus_nidulans_FGSC_A4 | gene_product=Ortholog(s) have Golgi apparatus, cell tip, cytoplasmic vesicle, endoplasmic reticulum, plasma membrane localization | transcript_product=Ortholog(s) have Golgi apparatus, cell tip, cytoplasmic vesicle, endoplasmic reticulum, plasma membrane localization | location=ChrVI_A_nidulans_FGSC_A4:289216-294019(+) | …	25	1243	30	30	0	1506	166.1	5.72	5935	84439.6	829.83	0	196.589		1.92106e+08	1.81669e+08	1.7335e+08	2.06521e+08	1.98017e+08	1.90594e+08	1.96838e+08	1.68645e+08	1.45787e+08	1.92106e+08	1.66783e+08	1.16983e+08	1.1274e+08	8.1573e+07	8.11922e+07	1.11778e+08	9.19848e+07	6.76117e+07	25	23	22	25	25	24	25	22	23	High	High	High	High	High	High	High
AN0776-T-p1	transcript=AN0776-T | gene=AN0776 | organism=Aspergillus_nidulans_FGSC_A4 | gene_product=Ortholog(s) have structural constituent of ribosome activity, role in cellular response to drug, cytoplasmic translation and cell surface, cytosolic large ribosomal subunit localization | transcript_product=Ortholog(s) have structural constituent of ribosome activity, role in cellular response to drug, cytopl…	47	1219	8	8	0	184	20.6	10.83	6134	79018.7	760.41	0	45.673		4.01858e+08	5.22916e+08	6.14381e+08	3.12644e+08	2.38028e+08	2.51627e+08	5.0158e+08	5.96723e+08	4.41055e+08	4.01858e+08	4.80067e+08	4.14608e+08	1.70673e+08	9.80555e+07	1.07192e+08	2.84832e+08	3.25474e+08	2.04548e+08	7	9	8	9	9	8	9	7	6	High	High	High	High	High	High	High
AN0870-T-p1	transcript=AN0870-T | gene=AN0870 | organism=Aspergillus_nidulans_FGSC_A4 | gene_product=Putative transporter with a predicted role in small molecule transport | transcript_product=Putative transporter with a predicted role in small molecule transport | location=ChrVIII_A_nidulans_FGSC_A4:2217373-2218540(+) | protein_length=314 | sequence_SO=chromosome | SO=protein_coding | is_pseudo=false	41	1214	12	12	0	314	32.9	9.36	11846	99256.5	1027.83	0	75.26		3.7029e+08	8.01344e+08	5.65547e+08	7.56797e+08	4.72221e+08	5.4113e+08	5.66207e+08	5.52901e+08	4.81282e+08	3.7029e+08	7.35679e+08	3.81653e+08	4.13137e+08	1.94531e+08	2.30519e+08	3.21532e+08	3.01572e+08	2.23204e+08	11	11	11	11	11	11	11	11	11	High	High	High	High	High	High	High
AN8039-T-p1	transcript=AN8039-T | gene=AN8039 | organism=Aspergillus_nidulans_FGSC_A4 | gene_product=Histone variant H2A.Z | transcript_product=Histone variant H2A.Z | location=ChrII_A_nidulans_FGSC_A4:576164-576877(-) | protein_length=136 | sequence_SO=chromosome | SO=protein_coding | is_pseudo=false	46	1212	5	4	0	136	14.6	10.37	6520	83283.4	892.7	0	34.502		3.38631e+07	5.35405e+07	6.31593e+07	8.07151e+07	7.06846e+07	6.2819e+07	6.23574e+07	8.56687e+07	5.41518e+07	3.38631e+07	4.91532e+07	4.26223e+07	4.40626e+07	2.91185e+07	2.67606e+07	3.54109e+07	4.67267e+07	2.51139e+07	4	4	4	3	3	3	3	4	4	High	High	High	High	High	High	High
AN0565-T-p1	transcript=AN0565-T | gene=AN0565 | organism=Aspergillus_nidulans_FGSC_A4 | gene_product=Multifunctional enzyme with carbamoyl-phosphate synthase (CPSase) and aspartate carbamoyltransferase (ATCase) activities that catalyze the first two steps in pyrimidine biosynthesis | transcript_product=Multifunctional enzyme with carbamoyl-phosphate synthase (CPSase) and aspartate carbamoyltransferase (ATCas…	26	1205	48	47	1	2256	247.2	6.35	6614	81833.3	753.61	0	243.54		2.38565e+08	2.73373e+08	2.84402e+08	2.06753e+08	2.0509e+08	4.33388e+08	2.02541e+08	1.9583e+08	2.02354e+08	2.38565e+08	2.50972e+08	1.91925e+08	1.12867e+08	8.44869e+07	1.84621e+08	1.15017e+08	1.06813e+08	9.38457e+07	37	36	36	38	35	34	36	38	35	High	High	High	High	High	High	High
AN7262-T-p1	transcript=AN7262-T | gene=AN7262 | organism=Aspergillus_nidulans_FGSC_A4 | gene_product=Ortholog of A. nidulans FGSC A4 : AN5649, AN1674, AN0384, AN1268, A. fumigatus Af293 : Afu1g01700, Afu2g17000, Afu4g08730, Afu4g13630, Afu1g10012 and A. niger CBS 513.88 : An01g09380, An01g06520, An04g09080, An04g03600 | transcript_product=Ortholog of A. nidulans FGSC A4 : AN5649, AN1674, AN0384, AN1268, A. f…	42	1187	41	41	0	1582	163.2	4.01	9121	103959	947.51	0	325.179	Acetyl [N-Term]	1.99998e+08	1.827e+08	2.13133e+08	6.07272e+08	6.41117e+08	6.47902e+08	5.54387e+08	1.26801e+08	1.11666e+08	1.99998e+08	1.67729e+08	1.4383e+08	3.31511e+08	2.64108e+08	2.76003e+08	3.14819e+08	6.91616e+07	5.17873e+07	34	28	23	31	25	26	20	21	19	High	High	High	High	High	High	High
AN7299-T-p1	transcript=AN7299-T | gene=AN7299 | organism=Aspergillus_nidulans_FGSC_A4 | gene_product=Ortholog(s) have DNA binding activity and cytosol, nucleus localization | transcript_product=Ortholog(s) have DNA binding activity and cytosol, nucleus localization | location=ChrIV_A_nidulans_FGSC_A4:374682-376373(-) | protein_length=403 | sequence_SO=chromosome | SO=protein_coding | is_pseudo=false	45	1185	22	22	0	403	43.8	7.77	5047	70915.4	641.08	0	104.223		7.89889e+08	5.15814e+08	3.97981e+08	5.50732e+08	4.86992e+08	6.65566e+08	4.2028e+08	3.34727e+08	5.80243e+08	7.89889e+08	4.73546e+08	2.68573e+08	3.00646e+08	2.00616e+08	2.83528e+08	2.38664e+08	1.82572e+08	2.69099e+08	21	19	19	21	18	20	19	17	19	High	High	High	High	High	High	High
AN0907-T-p1	transcript=AN0907-T | gene=AN0907 | organism=Aspergillus_nidulans_FGSC_A4 | gene_product=Ortholog(s) have structural constituent of ribosome activity and cytosolic small ribosomal subunit, nucleus localization | transcript_product=Ortholog(s) have structural constituent of ribosome activity and cytosolic small ribosomal subunit, nucleus localization | location=ChrVIII_A_nidulans_FGSC_A4:2104990-2…	57	1182	7	7	0	130	14.6	9.66	14631	113439	1171.13	0	84.997		2.9287e+08	4.14765e+08	2.57332e+08	1.06066e+08	1.46418e+08	1.17033e+08	2.2323e+08	8.29231e+07	7.24379e+07	2.9287e+08	3.80778e+08	1.73658e+08	5.79016e+07	6.03167e+07	4.98554e+07	1.26765e+08	4.52292e+07	3.35945e+07	6	6	5	7	6	6	6	6	6	High	High	High	High	High	High	High
AN4463-T-p1	transcript=AN4463-T | gene=AN4463 | organism=Aspergillus_nidulans_FGSC_A4 | gene_product=Ortholog(s) have cytoplasm localization | transcript_product=Ortholog(s) have cytoplasm localization | location=ChrIII_A_nidulans_FGSC_A4:1974727-1980142(+) | protein_length=1676 | sequence_SO=chromosome | SO=protein_coding | is_pseudo=false	25	1167	33	33	0	1676	190.8	5.29	7613	84647.5	877.73	0	224.581		1.9499e+08	1.35108e+08	1.23055e+08	2.0671e+08	1.98436e+08	1.86433e+08	2.02109e+08	2.26439e+08	3.12067e+08	1.9499e+08	1.24037e+08	8.30425e+07	1.12843e+08	8.17458e+07	7.94194e+07	1.14772e+08	1.23508e+08	1.44727e+08	29	26	24	30	24	25	26	26	25	High	High	High	High	High	High	High
AN4802-T-p1	transcript=AN4802-T | gene=AN4802 | organism=Aspergillus_nidulans_FGSC_A4 | gene_product=60S ribosomal protein L21 | transcript_product=60S ribosomal protein L21 | location=ChrIII_A_nidulans_FGSC_A4:942832-943553(+) | protein_length=158 | sequence_SO=chromosome | SO=protein_coding | is_pseudo=false	49	1167	9	9	0	158	18.1	10.18	5229	89766.8	901.61	0	50.28		3.65056e+08	5.02601e+08	3.15008e+08	2.74631e+08	3.58037e+08	2.1158e+08	3.38694e+08	3.66617e+08	3.02513e+08	3.65056e+08	4.61416e+08	2.1258e+08	1.49922e+08	1.47493e+08	9.01318e+07	1.92334e+08	1.99966e+08	1.40296e+08	7	5	7	7	8	7	7	6	7	High	High	High	High	High	High	High
AN6650-T-p1	transcript=AN6650-T | gene=AN6650 | organism=Aspergillus_nidulans_FGSC_A4 | gene_product=Methylcitrate synthase with a predicted role in the methylcitrate pathway or the TCA cycle | transcript_product=Methylcitrate synthase with a predicted role in the methylcitrate pathway or the TCA cycle | location=ChrI_A_nidulans_FGSC_A4:2731985-2733511(-) | protein_length=460 | sequence_SO=chromosome | SO=pr…	42	1162	17	17	0	460	50.5	8.91	7824	79520.7	683.34	0	123.22		7.8623e+07	8.88665e+07	1.44593e+08	1.85421e+08	2.07325e+08	2.02035e+08	2.56533e+08	5.82509e+08	2.93867e+08	7.8623e+07	8.15845e+07	9.75772e+07	1.01222e+08	8.54076e+07	8.60658e+07	1.45677e+08	3.17721e+08	1.36286e+08	16	15	14	16	15	15	14	13	14	High	High	High	High	High	High	High
AN4102-T-p1	transcript=AN4102-T | gene=AN4102 | organism=Aspergillus_nidulans_FGSC_A4 | gene_product=Putative beta-glucosidase | transcript_product=Putative beta-glucosidase | location=ChrII_A_nidulans_FGSC_A4:2078486-2081348(-) | protein_length=853 | sequence_SO=chromosome | SO=protein_coding | is_pseudo=false	31	1147	20	19	1	853	92.1	5.03	9118	94092.4	942.75	0	171.401		3.22715e+08	2.02279e+08	1.34936e+08	2.87964e+08	3.38105e+08	2.12601e+08	2.07545e+08	2.04016e+08	2.5305e+08	3.22715e+08	1.85704e+08	9.10602e+07	1.572e+08	1.39282e+08	9.0567e+07	1.17858e+08	1.11278e+08	1.17357e+08	17	19	16	19	21	19	16	20	16	High	High	High	High	High	High	High
AN3627-T-p1	transcript=AN3627-T | gene=AN3627 | organism=Aspergillus_nidulans_FGSC_A4 | gene_product=Ortholog(s) have intracellular localization | transcript_product=Ortholog(s) have intracellular localization | location=ChrII_A_nidulans_FGSC_A4:3551106-3554099(+) | protein_length=892 | sequence_SO=chromosome | SO=protein_coding | is_pseudo=false	32	1128	26	26	0	892	99.5	8.78	9446	84094.4	767.7	0	165.764		3.46904e+08	8.03402e+08	4.56071e+08	7.28625e+08	6.68992e+08	6.55944e+08	5.20421e+08	3.16882e+08	3.23479e+08	3.46904e+08	7.37568e+08	3.07774e+08	3.97758e+08	2.75591e+08	2.79429e+08	2.95531e+08	1.72839e+08	1.5002e+08	24	22	23	22	22	23	21	17	18	High	High	High	High	High	High	High
AN8273-T-p1	transcript=AN8273-T | gene=AN8273 | organism=Aspergillus_nidulans_FGSC_A4 | gene_product=Putative ubiquinol-cytochrome-c reductase subunit with a predicted role in energy metabolism | transcript_product=Putative ubiquinol-cytochrome-c reductase subunit with a predicted role in energy metabolism | location=ChrII_A_nidulans_FGSC_A4:1347739-1349328(+) | protein_length=459 | sequence_SO=chromosome | …	22	1098	12	12	0	459	47.7	9.01	10902	95460.1	869.45	0	70.529		6.65114e+08	8.90989e+08	6.94574e+08	8.684e+08	9.22643e+08	6.60498e+08	8.34861e+08	7.42473e+08	6.99957e+08	6.65114e+08	8.17979e+08	4.68725e+08	4.74062e+08	3.80083e+08	2.81369e+08	4.74092e+08	4.04971e+08	3.24618e+08	12	12	10	12	10	10	11	9	10	High	High	High	High	High	High	High
AN4376-T-p1	transcript=AN4376-T | gene=AN4376 | organism=Aspergillus_nidulans_FGSC_A4 | gene_product=Putative NADP-linked glutamate dehydrogenase | transcript_product=Putative NADP-linked glutamate dehydrogenase | location=ChrIII_A_nidulans_FGSC_A4:2217980-2219465(-) | protein_length=459 | sequence_SO=chromosome | SO=protein_coding | is_pseudo=false	48	1096	19	19	0	459	49.6	6.47	9112	86175.4	880.88	0	116.349		1.40415e+08	1.68444e+08	1.33605e+08	2.09906e+08	2.91771e+08	2.94609e+08	1.90675e+08	2.90858e+08	3.00915e+08	1.40415e+08	1.54641e+08	9.0162e+07	1.14588e+08	1.20195e+08	1.25502e+08	1.08278e+08	1.58644e+08	1.39555e+08	15	13	14	17	16	16	13	16	14	High	High	High	High	High	High	High
AN4888-T-p1	transcript=AN4888-T | gene=AN4888 | organism=Aspergillus_nidulans_FGSC_A4 | gene_product=Putative pyruvate decarboxylase with a predicted role in pyruvate metabolism or penicillin biosynthesis | transcript_product=Putative pyruvate decarboxylase with a predicted role in pyruvate metabolism or penicillin biosynthesis | location=ChrIII_A_nidulans_FGSC_A4:658182-660112(+) | protein_length=568 | sequ…	27	1094	12	12	0	568	62.6	6.37	6659	88245.1	930.41	0	108.384		1.42093e+08	1.12989e+08	1.71971e+08	1.67592e+08	1.06753e+08	1.01617e+08	1.0478e+08	1.98532e+08	2.20718e+08	1.42093e+08	1.0373e+08	1.16053e+08	9.1489e+07	4.39768e+07	4.32882e+07	5.95015e+07	1.08286e+08	1.02362e+08	11	11	12	14	10	11	12	11	11	High	High	High	High	High	High	High
AN1228-T-p1	transcript=AN1228-T | gene=AN1228 | organism=Aspergillus_nidulans_FGSC_A4 | gene_product=Ortholog(s) have role in maturation of LSU-rRNA from tricistronic rRNA transcript (SSU-rRNA, 5.8S rRNA, LSU-rRNA) and cytosolic large ribosomal subunit, nucleolus, preribosome, large subunit precursor localization | transcript_product=Ortholog(s) have role in maturation of LSU-rRNA from tricistronic rRNA tran…	27	1093	5	5	0	124	14.5	11.22	5655	59668.4	453.24	0	25.249		1.09436e+09	7.81067e+08	9.43214e+08	6.29142e+08	5.46038e+08	6.21359e+08	7.63824e+08	6.91457e+08	4.45584e+08	1.09436e+09	7.17064e+08	6.36517e+08	3.4345e+08	2.2494e+08	2.64696e+08	4.33752e+08	3.77145e+08	2.06648e+08	5	5	4	5	5	5	5	5	5	High	High	High	High	High	High	High
AN10170-T-p1	transcript=AN10170-T | gene=AN10170 | organism=Aspergillus_nidulans_FGSC_A4 | gene_product=Ortholog(s) have ATPase activity and cytosol, nucleus localization | transcript_product=Ortholog(s) have ATPase activity and cytosol, nucleus localization | location=ChrVIII_A_nidulans_FGSC_A4:953825-955378(+) | protein_length=394 | sequence_SO=chromosome | SO=protein_coding | is_pseudo=false	55	1091	19	19	0	394	43.6	7.83	7598	75764.6	750.66	0	119.426		2.55283e+08	5.43478e+08	3.16383e+08	2.85096e+08	3.51765e+08	3.05889e+08	2.31661e+08	2.82904e+08	7.38764e+08	2.55283e+08	4.98944e+08	2.13507e+08	1.55635e+08	1.44909e+08	1.30307e+08	1.31553e+08	1.54306e+08	3.42616e+08	16	17	14	15	17	17	17	16	16	High	High	High	High	High	High	High
AN5790-T-p1	transcript=AN5790-T | gene=AN5790 | organism=Aspergillus_nidulans_FGSC_A4 | gene_product=Putative isocitrate dehydrogenase (NAD+) with a predicted role in the TCA cycle | transcript_product=Putative isocitrate dehydrogenase (NAD+) with a predicted role in the TCA cycle | location=ChrV_A_nidulans_FGSC_A4:1696926-1698579(+) | protein_length=439 | sequence_SO=chromosome | SO=protein_coding | is_pseu…	21	1087	9	9	0	439	47.9	8.94	5443	68262	721.95	0	71.505		3.82591e+08	1.67892e+08	2.4902e+08	3.3509e+08	2.25316e+08	2.05569e+08	2.14998e+08	2.15095e+08	2.76414e+08	3.82591e+08	1.54134e+08	1.68048e+08	1.82927e+08	9.28188e+07	8.75715e+07	1.22091e+08	1.1732e+08	1.28192e+08	10	9	10	10	9	9	9	10	8	High	High	High	High	High	High	High
AN6031-T-p1	transcript=AN6031-T | gene=AN6031 | organism=Aspergillus_nidulans_FGSC_A4 | gene_product=Ortholog(s) have glyoxysome localization | transcript_product=Ortholog(s) have glyoxysome localization | location=ChrI_A_nidulans_FGSC_A4:1454670-1455904(+) | protein_length=355 | sequence_SO=chromosome | SO=protein_coding | is_pseudo=false	51	1087	13	13	0	355	37.6	7.55	8653	91324.9	852.31	0	114.181		5.92137e+07	8.58355e+07	3.3258e+07	1.03013e+08	1.32393e+08	1.32648e+08	1.33818e+08	9.36566e+07	7.26331e+07	5.92137e+07	7.88019e+07	2.24437e+07	5.6235e+07	5.45395e+07	5.65074e+07	7.59912e+07	5.10836e+07	3.3685e+07	8	11	7	11	11	12	10	9	9	High	High	High	High	High	High	High
AN11070-T-p1	transcript=AN11070-T | gene=AN11070 | organism=Aspergillus_nidulans_FGSC_A4 | gene_product=Ortholog(s) have metalloaminopeptidase activity and fungal-type vacuole localization | transcript_product=Ortholog(s) have metalloaminopeptidase activity and fungal-type vacuole localization | location=ChrII_A_nidulans_FGSC_A4:1283454-1285013(+) | protein_length=519 | sequence_SO=chromosome | SO=protein_cod…	30	1086	12	12	0	519	56.7	6.89	5970	76524.8	870.61	0	104.049		1.4597e+08	1.14309e+08	1.29881e+08	9.59468e+07	1.04449e+08	9.1336e+07	1.59655e+08	2.28222e+08	2.05845e+08	1.4597e+08	1.04942e+08	8.76485e+07	5.23776e+07	4.30277e+07	3.89087e+07	9.0663e+07	1.2448e+08	9.54648e+07	12	12	10	12	12	12	11	11	11	High	High	High	High	High	High	High
Afu1g00980-T-p1	transcript=Afu1g00980-T | gene=Afu1g00980 | organism=Aspergillus_fumigatus_Af293 | gene_product=Monocarboxylate transporter, putative | transcript_product=Monocarboxylate transporter, putative | location=Chr1_A_fumigatus_Af293:344953-346714(-) | protein_length=496 | sequence_SO=chromosome | SO=protein_coding | is_pseudo=false	18	1081	10	10	0	496	53.6	7.24	7341	68748.1	692.3	0	58.731		1.16778e+08	2.50213e+08	1.64195e+08	3.02726e+08	2.51202e+08	2.27914e+08	2.20058e+08	1.8734e+08	1.26985e+08	1.16778e+08	2.2971e+08	1.10805e+08	1.65259e+08	1.03482e+08	9.70902e+07	1.24964e+08	1.02182e+08	5.88919e+07	9	10	8	9	9	9	10	8	9	High	High	High	High	High	High	High
AN2012-T-p1	transcript=AN2012-T | gene=AN2012 | organism=Aspergillus_nidulans_FGSC_A4 | gene_product=Ortholog of A. fumigatus Af293 : Afu4g10200/rfeF, A. niger CBS 513.88 : An04g06870, A. oryzae RIB40 : AO090003001201, Aspergillus wentii : Aspwe1_0230245 and Aspergillus sydowii : Aspsy1_0084459 | transcript_product=Ortholog of A. fumigatus Af293 : Afu4g10200/rfeF, A. niger CBS 513.88 : An04g06870, A. oryzae …	32	1075	14	14	0	524	55.1	5.44	6902	80942.5	780.52	0	108.049		2.03925e+08	2.82148e+08	2.13004e+08	2.1801e+08	2.40614e+08	2.23472e+08	2.19558e+08	2.54488e+08	3.45235e+08	2.03925e+08	2.59028e+08	143743344	1.19012e+08	9.91209e+07	9.51979e+07	1.2468e+08	1.38806e+08	1.60109e+08	13	14	13	15	12	11	11	12	11	High	High	High	High	High	High	High
AN4769-T-p1	transcript=AN4769-T | gene=AN4769 | organism=Aspergillus_nidulans_FGSC_A4 | gene_product=ATP sulfurylase involved in sulfate assimilation | transcript_product=ATP sulfurylase involved in sulfate assimilation | location=ChrIII_A_nidulans_FGSC_A4:1051454-1053680(+) | protein_length=574 | sequence_SO=chromosome | SO=protein_coding | is_pseudo=false	37	1069	19	19	0	574	63.9	7.37	6131	65238.7	581.61	0	115.842	Acetyl [N-Term]	3.69751e+08	2.94243e+08	3.04975e+08	2.19782e+08	2.13062e+08	2.83545e+08	1.88145e+08	2.52966e+08	2.77324e+08	3.69751e+08	2.70132e+08	2.05809e+08	1.1998e+08	8.77707e+07	1.20789e+08	1.06842e+08	1.37976e+08	1.28614e+08	18	16	17	15	18	18	16	17	16	High	High	High	High	High	High	High
AN0357-T-p1	transcript=AN0357-T | gene=AN0357 | organism=Aspergillus_nidulans_FGSC_A4 | gene_product=Putative ubiquinol-cytochrome-c reductase subunit with a predicted role in energy metabolism | transcript_product=Putative ubiquinol-cytochrome-c reductase subunit with a predicted role in energy metabolism | location=ChrVIII_A_nidulans_FGSC_A4:3805510-3806801(+) | protein_length=316 | sequence_SO=chromosome …	32	1062	8	8	0	316	34.9	8.22	5717	71098.1	604.72	0	73.128		2.9213e+08	3.23092e+08	1.71691e+08	1.37054e+08	1.84961e+08	1.75064e+08	1.93476e+08	2.04982e+08	1.9596e+08	2.9213e+08	2.96617e+08	1.15864e+08	7.48181e+07	7.61948e+07	7.45766e+07	1.09869e+08	1.11804e+08	9.08804e+07	7	8	8	7	8	8	7	7	7	High	High	High	High	High	High	High
AN2981-T-p1	transcript=AN2981-T | gene=AN2981 | organism=Aspergillus_nidulans_FGSC_A4 | gene_product=Putative glucose 6-phosphate 1-dehydrogenase with a predicted role in the pentose-phosphate shunt | transcript_product=Putative glucose 6-phosphate 1-dehydrogenase with a predicted role in the pentose-phosphate shunt | location=ChrVI_A_nidulans_FGSC_A4:2183789-2186058(-) | protein_length=511 | sequence_SO=chr…	35	1051	19	19	0	511	58.9	6.71	4736	61495	341.46	0	124.311		2.81083e+08	2.10256e+08	1.01898e+08	2.32333e+08	2.01678e+08	2.0696e+08	2.14006e+08	1.511e+08	1.99376e+08	2.81083e+08	1.93027e+08	6.87644e+07	1.26831e+08	8.30812e+07	8.81638e+07	1.21527e+08	8.24154e+07	9.24643e+07	15	16	16	17	14	15	15	16	14	High	High	High	High	High	High	High
AN2998-T-p1	transcript=AN2998-T | gene=AN2998 | organism=Aspergillus_nidulans_FGSC_A4 | gene_product=Putative multifunctional enzyme with a predicted role in one-carbon metabolism | transcript_product=Putative multifunctional enzyme with a predicted role in one-carbon metabolism | location=ChrVI_A_nidulans_FGSC_A4:2140670-2144012(-) | protein_length=1031 | sequence_SO=chromosome | SO=protein_coding | is_pseu…	30	1030	30	30	0	1031	110.7	8.34	7064	69760.8	611	0	161.737		8.23807e+08	1.08947e+09	1.10778e+09	6.86286e+08	5.17932e+08	6.12175e+08	7.83248e+08	5.35547e+08	6.99413e+08	8.23807e+08	1.00019e+09	7.47575e+08	3.74645e+08	2.13362e+08	2.60783e+08	4.44783e+08	2.92106e+08	3.24366e+08	22	23	21	22	23	21	24	24	21	High	High	High	High	High	High	High
AN9148-T-p1	transcript=AN9148-T | gene=AN9148 | organism=Aspergillus_nidulans_FGSC_A4 | gene_product=Putative UTP-glucose-1-phosphate uridylyltransferase with a predicted role in galactose and galactitol metabolism | transcript_product=Putative UTP-glucose-1-phosphate uridylyltransferase with a predicted role in galactose and galactitol metabolism | location=ChrVI_A_nidulans_FGSC_A4:295899-297880(+) | protei…	38	1025	19	19	0	514	57.5	7.66	3360	58396.8	493.07	0	87.794		2.55108e+08	2.2449e+08	3.80088e+08	3.80341e+08	3.04219e+08	3.94912e+08	4.40412e+08	3.70206e+08	2.69882e+08	2.55108e+08	2.06095e+08	2.56498e+08	2.07629e+08	1.25323e+08	1.68231e+08	2.50097e+08	2.01923e+08	1.25163e+08	16	15	15	17	16	16	17	15	15	High	High	High	High	High	High	High
AN3172-T-p1	transcript=AN3172-T | gene=AN3172 | organism=Aspergillus_nidulans_FGSC_A4 | gene_product=Ortholog of S. cerevisiae RPS0A and RPS0B | transcript_product=Ortholog of S. cerevisiae RPS0A and RPS0B | location=ChrVI_A_nidulans_FGSC_A4:1592512-1593465(+) | protein_length=293 | sequence_SO=chromosome | SO=protein_coding | is_pseudo=false	27	1022	7	7	0	293	31.6	4.91	7673	84191.4	842.58	0	58.114		4.40129e+08	5.93056e+08	6.4693e+08	5.26972e+08	4.76372e+08	5.01067e+08	7.04613e+08	7.91365e+08	4.12054e+08	4.40129e+08	5.44459e+08	4.36573e+08	2.87676e+08	1.96242e+08	2.13452e+08	4.00128e+08	4.31638e+08	1.91098e+08	7	6	6	7	7	7	6	6	6	High	High	High	High	High	High	High
AN10266-T-p1	transcript=AN10266-T | gene=AN10266 | organism=Aspergillus_nidulans_FGSC_A4 | gene_product=Putative ubiquitin-activating enzyme | transcript_product=Putative ubiquitin-activating enzyme | location=ChrVII_A_nidulans_FGSC_A4:3104875-3108181(-) | protein_length=1033 | sequence_SO=chromosome | SO=protein_coding | is_pseudo=false	27	1021	24	24	0	1033	114.7	5.31	5570	66564.7	589.57	0	139.134		3.3209e+08	1.58767e+08	1.43107e+08	2.58467e+08	2.34605e+08	2.79384e+08	2.35184e+08	2.69974e+08	1.97714e+08	3.3209e+08	1.45757e+08	9.65741e+07	1.41098e+08	9.66454e+07	1.19016e+08	1.33554e+08	1.47253e+08	9.16939e+07	16	21	20	18	21	18	20	18	18	High	High	High	High	High	High	High
AN5222-T-p1	transcript=AN5222-T | gene=AN5222 | organism=Aspergillus_nidulans_FGSC_A4 | gene_product=Ortholog(s) have structural constituent of ribosome activity and role in maturation of SSU-rRNA from tricistronic rRNA transcript (SSU-rRNA, 5.8S rRNA, LSU-rRNA), ribosomal small subunit assembly | transcript_product=Ortholog(s) have structural constituent of ribosome activity and role in maturation of SSU-rR…	31	1016	7	7	0	160	18.5	10.83	5802	52505.7	418.32	0	35.977		2.92845e+08	1.30837e+08	2.6699e+08	2.28741e+08	1.54847e+08	1.09846e+08	1.76164e+08	1.26935e+08	2.22452e+08	2.92845e+08	1.20116e+08	1.80175e+08	1.2487e+08	6.37893e+07	4.67939e+07	1.00038e+08	6.92345e+07	1.03166e+08	7	5	4	7	6	5	5	6	5	High	High	High	High	High	High	High
AN8218-T-p1	transcript=AN8218-T | gene=AN8218 | organism=Aspergillus_nidulans_FGSC_A4 | gene_product=Putative thioredoxin reductase | transcript_product=Putative thioredoxin reductase | location=ChrII_A_nidulans_FGSC_A4:1181630-1182911(+) | protein_length=385 | sequence_SO=chromosome | SO=protein_coding | is_pseudo=false	42	1014	12	12	0	385	41.8	5.21	5953	69239.5	733.47	0	102.434		1.49472e+08	1.59402e+08	1.59169e+08	1.33328e+08	1.34842e+08	1.45231e+08	1.54251e+08	2.05202e+08	3.00936e+08	1.49472e+08	1.4634e+08	1.07413e+08	7.27842e+07	5.5548e+07	6.18675e+07	8.75943e+07	1.11924e+08	1.39565e+08	12	12	13	12	12	11	12	12	11	High	High	High	High	High	High	High
AN2968-T-p1	transcript=AN2968-T | gene=AN2968 | organism=Aspergillus_nidulans_FGSC_A4 | gene_product=Putative inorganic diphosphatase with a predicted role in energy metabolism | transcript_product=Putative inorganic diphosphatase with a predicted role in energy metabolism | location=ChrVI_A_nidulans_FGSC_A4:2217727-2218827(-) | protein_length=287 | sequence_SO=chromosome | SO=protein_coding | is_pseudo=false	61	1010	13	13	0	287	32.3	5.36	6859	68943.8	652.46	0	95.776		3.23086e+08	1.98691e+08	2.32539e+08	2.54816e+08	3.09343e+08	2.35873e+08	1.6309e+08	2.59794e+08	1.46562e+08	3.23086e+08	1.82409e+08	1.56927e+08	1.39105e+08	1.27434e+08	1.00481e+08	9.26138e+07	1.41701e+08	6.79711e+07	12	12	11	13	12	11	13	11	11	High	High	High	High	High	High	High
AN8863-T-p1	transcript=AN8863-T | gene=AN8863 | organism=Aspergillus_nidulans_FGSC_A4 | gene_product=Nap/SET family protein | transcript_product=Nap/SET family protein | location=ChrIII_A_nidulans_FGSC_A4:2565709-2567199(+) | protein_length=409 | sequence_SO=chromosome | SO=protein_coding | is_pseudo=false	36	1009	12	12	0	409	46.3	4.54	7609	76490.2	765.27	0	82.86		3.35922e+08	3.96482e+08	3.46026e+08	3.41422e+08	3.0477e+08	2.61443e+08	2.30433e+08	3.12977e+08	2.60871e+08	3.35922e+08	3.63993e+08	2.33512e+08	1.86383e+08	1.2555e+08	1.11373e+08	1.30856e+08	1.70709e+08	1.20984e+08	8	9	11	13	12	12	10	10	9	High	High	High	High	High	High	High
AN8182-T-p1	transcript=AN8182-T | gene=AN8182 | organism=Aspergillus_nidulans_FGSC_A4 | gene_product=Septin, involved in development | transcript_product=Septin, involved in development | location=ChrII_A_nidulans_FGSC_A4:1046907-1048209(-) | protein_length=351 | sequence_SO=chromosome | SO=protein_coding | is_pseudo=false	36	1003	12	11	1	351	40.8	7.39	8162	74407.7	764.5	0	74.021		3.86147e+08	2.88744e+08	2.05895e+08	3.25794e+08	2.91173e+08	2.4555e+08	3.07073e+08	1.43668e+08	2.59757e+08	3.86147e+08	2.65083e+08	1.38945e+08	1.77852e+08	1.19948e+08	1.04603e+08	1.74378e+08	7.83617e+07	1.20467e+08	11	8	9	11	10	11	10	11	10	High	High	High	High	High	High	High
AN4522-T-p1	transcript=AN4522-T | gene=AN4522 | organism=Aspergillus_nidulans_FGSC_A4 | gene_product=Ortholog(s) have cytosolic large ribosomal subunit localization | transcript_product=Ortholog(s) have cytosolic large ribosomal subunit localization | location=ChrIII_A_nidulans_FGSC_A4:1776419-1777135(+) | protein_length=116 | sequence_SO=chromosome | SO=protein_coding | is_pseudo=false	42	996	6	6	0	116	13.3	10.76	1782	52725.9	378.27	0	28.957		5.90471e+08	4.97677e+08	6.3518e+08	4.89507e+08	3.25693e+08	3.83973e+08	3.10004e+08	3.88384e+08	1.61571e+08	5.90471e+08	4.56896e+08	4.28644e+08	2.67223e+08	1.34169e+08	1.6357e+08	1.76042e+08	2.11838e+08	7.49318e+07	5	4	5	6	5	5	5	5	5	High	High	High	High	High	High	High
AN4202-T-p1	transcript=AN4202-T | gene=AN4202 | organism=Aspergillus_nidulans_FGSC_A4 | gene_product=Predicted ribosomal protein of the large (60S) ribosomal subunit | transcript_product=Predicted ribosomal protein of the large (60S) ribosomal subunit | location=ChrII_A_nidulans_FGSC_A4:1764149-1765132(+) | protein_length=202 | sequence_SO=chromosome | SO=protein_coding | is_pseudo=false	39	990	12	12	0	202	23	10.7	4387	55767.2	468.04	0	47.55	Acetyl [N-Term]	1.38246e+09	5.75549e+08	6.40606e+08	5.24513e+08	3.25776e+08	5.25502e+08	3.93575e+08	6.26698e+08	1.45902e+09	1.38246e+09	5.28387e+08	4.32305e+08	2.86333e+08	1.34203e+08	2.23861e+08	223499378	3.41823e+08	6.76648e+08	10	9	8	9	8	8	10	10	10	High	High	High	High	High	High	High
AN2279-T-p1	transcript=AN2279-T | gene=AN2279 | organism=Aspergillus_nidulans_FGSC_A4 | gene_product=Ortholog(s) have role in cellular protein localization, endoplasmic reticulum inheritance, endoplasmic reticulum tubular network organization, nuclear pore complex assembly, vesicle-mediated transport | transcript_product=Ortholog(s) have role in cellular protein localization, endoplasmic reticulum inheritanc…	26	985	5	5	0	169	18.9	8.82	10020	71965.5	795.22	0	34.129		5.91716e+08	6.07471e+08	4.30266e+08	3.57886e+08	2.94493e+08	3.87659e+08	6.67565e+08	3.84628e+08	4.10809e+08	5.91716e+08	5.57693e+08	2.9036e+08	1.95371e+08	1.21316e+08	1.65141e+08	3.7909e+08	2.09789e+08	1.9052e+08	5	5	5	5	5	5	4	5	5	High	High	High	High	High	High	High
AN6700-T-p1	transcript=AN6700-T | gene=AN6700 | organism=Aspergillus_nidulans_FGSC_A4 | gene_product=Ortholog(s) have cytosol localization | transcript_product=Ortholog(s) have cytosol localization | location=ChrI_A_nidulans_FGSC_A4:2894554-2897960(-) | protein_length=1103 | sequence_SO=chromosome | SO=protein_coding | is_pseudo=false	37	982	33	33	0	1103	121.3	6.1	6472	70793	674.34	0	195.714		2.07002e+08	1.24721e+08	1.20689e+08	2.07203e+08	1.42029e+08	1.68346e+08	1.2321e+08	1.42394e+08	1.44672e+08	2.07002e+08	1.14501e+08	8.14457e+07	1.13113e+08	5.85087e+07	7.17144e+07	6.9967e+07	7.76665e+07	6.70944e+07	24	23	24	24	26	22	24	28	22	High	High	High	High	High	High	High
AN9419-T-p1	transcript=AN9419-T | gene=AN9419 | organism=Aspergillus_nidulans_FGSC_A4 | gene_product=Ortholog(s) have alanine-tRNA ligase activity, role in alanyl-tRNA aminoacylation and cytosol, mitochondrion localization | transcript_product=Ortholog(s) have alanine-tRNA ligase activity, role in alanyl-tRNA aminoacylation and cytosol, mitochondrion localization | location=ChrVII_A_nidulans_FGSC_A4:668328-6…	35	982	27	27	0	1009	112.6	6.52	6671	69330.3	642.07	0	181.625		2.71117e+08	1.74653e+08	2.30501e+08	3.33736e+08	3.80939e+08	3.57025e+08	3.00251e+08	3.34143e+08	1.45299e+08	2.71117e+08	1.60342e+08	1.55551e+08	1.82188e+08	1.56928e+08	1.52091e+08	1.70504e+08	1.82253e+08	6.73853e+07	21	24	22	22	23	21	19	21	17	High	High	High	High	High	High	High
AN1502-T-p1	transcript=AN1502-T | gene=AN1502 | organism=Aspergillus_nidulans_FGSC_A4 | gene_product=Extracellular N-acetyl-beta-glucosaminidase with a predicted role in chitin hydrolysis | transcript_product=Extracellular N-acetyl-beta-glucosaminidase with a predicted role in chitin hydrolysis | location=ChrVII_A_nidulans_FGSC_A4:994263-996074(-) | protein_length=603 | sequence_SO=chromosome | SO=protein_co…	27	980	15	15	0	603	67.9	4.96	5663	66094.6	643.91	0	100.989		5.43572e+08	5.34112e+08	3.24424e+08	3.69266e+08	3.63569e+08	2.86142e+08	2.8891e+08	4.28307e+08	2.95255e+08	5.43572e+08	4.90345e+08	2.18934e+08	2.01583e+08	1.49772e+08	1.21895e+08	1.64063e+08	2.33614e+08	1.3693e+08	13	15	13	14	15	16	15	14	15	High	High	High	High	High	High	High
AN4222-T-p1	transcript=AN4222-T | gene=AN4222 | organism=Aspergillus_nidulans_FGSC_A4 | gene_product=Ortholog(s) have cytosolic large ribosomal subunit, nucleus, small-subunit processome localization | transcript_product=Ortholog(s) have cytosolic large ribosomal subunit, nucleus, small-subunit processome localization | location=ChrII_A_nidulans_FGSC_A4:1700210-1700927(+) | protein_length=135 | sequence_SO=c…	50	972	8	8	0	135	15.6	10.54	6703	62443.7	687.77	0	55.88		7.53913e+08	6.74046e+08	6.06928e+08	6.2121e+08	5.65287e+08	5.11602e+08	5.30819e+08	5.98866e+08	6.15695e+08	7.53913e+08	6.18812e+08	4.09578e+08	3.3912e+08	2.3287e+08	2.1794e+08	3.01436e+08	3.26643e+08	2.85541e+08	6	7	7	8	7	7	7	6	7	High	High	High	High	High	High	High
AN6083-T-p1	transcript=AN6083-T | gene=AN6083 | organism=Aspergillus_nidulans_FGSC_A4 | gene_product=Ortholog(s) have role in ribosomal large subunit assembly, translational termination and cell surface, cytosolic large ribosomal subunit localization | transcript_product=Ortholog(s) have role in ribosomal large subunit assembly, translational termination and cell surface, cytosolic large ribosomal subunit lo…	58	971	14	14	0	221	25.5	10.32	4918	58969.7	498.29	0	74.448		7.47612e+08	7.22863e+08	4.53184e+08	5.78672e+08	4.67378e+08	6.11336e+08	5.84875e+08	6.38417e+08	4.39167e+08	7.47612e+08	6.63629e+08	3.05826e+08	3.15899e+08	1.92536e+08	2.60426e+08	3.32133e+08	3.48215e+08	2.03672e+08	12	8	10	15	13	12	12	13	11	High	High	High	High	High	High	High
AN10223-T-p1	transcript=AN10223-T | gene=AN10223 | organism=Aspergillus_nidulans_FGSC_A4 | gene_product=Putative 1-Cys peroxiredoxin | transcript_product=Putative 1-Cys peroxiredoxin | location=ChrVII_A_nidulans_FGSC_A4:1631540-1632512(+) | protein_length=223 | sequence_SO=chromosome | SO=protein_coding | is_pseudo=false	54	970	12	9	3	223	24.6	6.14	5848	64932.4	627.64	0	68.2		4.4668e+08	4.85457e+08	4.6475e+08	3.67209e+08	3.52664e+08	3.62831e+08	3.47635e+08	3.57567e+08	6.83044e+08	4.4668e+08	4.45677e+08	3.13631e+08	2.0046e+08	1.4528e+08	1.54564e+08	1.97411e+08	1.9503e+08	3.16775e+08	8	10	8	9	10	10	8	8	9	High	High	High	High	High	High	High
AN4000-T-p1	transcript=AN4000-T | gene=AN4000 | organism=Aspergillus_nidulans_FGSC_A4 | gene_product=Protein with similarity to poly(A)-binding proteins | transcript_product=Protein with similarity to poly(A)-binding proteins | location=ChrII_A_nidulans_FGSC_A4:2376497-2378755(-) | protein_length=732 | sequence_SO=chromosome | SO=protein_coding | is_pseudo=false	21	957	15	15	0	732	79.3	6.02	5480	59583.9	509.93	0	79.747		4.1719e+08	4.34135e+08	3.62315e+08	4.1202e+08	4.17483e+08	4.61934e+08	3.92673e+08	3.79094e+08	3.90079e+08	4.1719e+08	3.98561e+08	2.44504e+08	2.24923e+08	1.71982e+08	1.96782e+08	2.22987e+08	2.06771e+08	1.80906e+08	14	12	11	14	14	12	14	14	13	High	High	High	High	High	High	High
AN12465-T-p1	transcript=AN12465-T | gene=AN12465 | organism=Aspergillus_nidulans_FGSC_A4 | gene_product=Ortholog(s) have role in cellular response to biotic stimulus, filamentous growth of a population of unicellular organisms in response to biotic stimulus and mitochondrion localization | transcript_product=Ortholog(s) have role in cellular response to biotic stimulus, filamentous growth of a population of u…	35	954	16	16	0	511	54.6	7.58	6569	71218.3	734.27	0	115.237		3.43489e+08	6.88297e+08	5.46027e+08	4.33531e+08	4.34267e+08	4.37208e+08	3.74926e+08	3.66728e+08	3.63911e+08	3.43489e+08	6.31895e+08	3.6848e+08	2.36666e+08	1.78896e+08	1.86249e+08	2.12909e+08	2.00026e+08	1.68771e+08	14	15	16	15	15	16	16	13	13	High	High	High	High	High	High	High
AN2286-T-p1	transcript=AN2286-T | gene=AN2286 | organism=Aspergillus_nidulans_FGSC_A4 | gene_product=Alcohol dehydrogenase III with a predicted role in two-carbon compound metabolism | transcript_product=Alcohol dehydrogenase III with a predicted role in two-carbon compound metabolism | location=ChrVII_A_nidulans_FGSC_A4:3445392-3446591(-) | protein_length=352 | sequence_SO=chromosome | SO=protein_coding | i…	51	949	13	12	1	352	37.1	7.05	5737	81200	815.5	0	136.926	Acetyl [N-Term]	2.73428e+08	3.99683e+08	3.03778e+08	3.26891e+08	3.76997e+08	3.41355e+08	4.15905e+08	3.85135e+08	3.5102e+08	2.73428e+08	3.66931e+08	2.05001e+08	1.78451e+08	1.55304e+08	1.45415e+08	2.3618e+08	2.10066e+08	1.62792e+08	12	14	12	12	14	11	12	12	13	High	High	High	High	High	High	High
AN5997-T-p1	transcript=AN5997-T | gene=AN5997 | organism=Aspergillus_nidulans_FGSC_A4 | gene_product=40s ribosomal protein s15, putative | transcript_product=40s ribosomal protein s15, putative | location=ChrI_A_nidulans_FGSC_A4:1556973-1557824(-) | protein_length=153 | sequence_SO=chromosome | SO=protein_coding | is_pseudo=false	46	949	7	7	0	153	17.7	10.07	7156	77440.6	688.2	0	97.378		8.1388e+08	6.81532e+08	2.6887e+08	2.8808e+08	4.59822e+08	6.5439e+08	6.0194e+08	1.69594e+08	1.55242e+08	8.1388e+08	6.25685e+08	1.81443e+08	1.57264e+08	1.89424e+08	2.78767e+08	3.41823e+08	9.25028e+07	7.19967e+07	9	7	6	6	8	7	8	6	6	High	High	High	High	High	High	High
AN5979-T-p1	transcript=AN5979-T | gene=AN5979 | organism=Aspergillus_nidulans_FGSC_A4 | gene_product=Ortholog(s) have role in ribosomal small subunit assembly and cytosol localization | transcript_product=Ortholog(s) have role in ribosomal small subunit assembly and cytosol localization | location=ChrI_A_nidulans_FGSC_A4:1607409-1608051(-) | protein_length=139 | sequence_SO=chromosome | SO=protein_coding | i…	27	948	6	5	1	139	16.1	9.94	3116	46295.4	280.27	0	35.486		4.30692e+07	6.12957e+07	1.3616e+08	1.21395e+08	1.64149e+08	1.39286e+08	1.30315e+08	1.40337e+08	2.52017e+08	4.30692e+07	5.62729e+07	9.18863e+07	6.627e+07	6.7621e+07	5.9335e+07	7.40018e+07	7.65445e+07	1.16878e+08	5	6	6	5	6	5	6	6	6	High	High	High	High	High	High	High
AN2142-T-p1	transcript=AN2142-T | gene=AN2142 | organism=Aspergillus_nidulans_FGSC_A4 | gene_product=Karyopherin (importin) alpha, involved in protein import into nucleus | transcript_product=Karyopherin (importin) alpha, involved in protein import into nucleus | location=ChrVII_A_nidulans_FGSC_A4:3012006-3013947(+) | protein_length=553 | sequence_SO=chromosome | SO=protein_coding | is_pseudo=false	24	937	15	15	0	553	60.6	5.11	5535	66027.9	592.08	0	126.353		3.77497e+08	5.20515e+08	4.34563e+08	4.65197e+08	4.39959e+08	3.9695e+08	4.11965e+08	2.74093e+08	3.16128e+08	3.77497e+08	4.77862e+08	2.9326e+08	2.53952e+08	1.81241e+08	1.69098e+08	2.33943e+08	1.495e+08	1.46611e+08	12	13	12	12	13	12	13	11	11	High	High	High	High	High	High	High
AN1084-T-p1	transcript=AN1084-T | gene=AN1084 | organism=Aspergillus_nidulans_FGSC_A4 | gene_product=Putative elongation factor EF-Tu | transcript_product=Putative elongation factor EF-Tu | location=ChrVIII_A_nidulans_FGSC_A4:1569338-1570899(-) | protein_length=439 | sequence_SO=chromosome | SO=protein_coding | is_pseudo=false	38	932	13	13	0	439	48.3	6.92	7551	78507.3	815.59	0	91.979		2.50641e+08	1.47e+08	1.85692e+08	1.92718e+08	2.64266e+08	2.01559e+08	1.36458e+08	1.21231e+08	1.36909e+08	2.50641e+08	1.34954e+08	1.25312e+08	1.05205e+08	1.08864e+08	8.58631e+07	7.74902e+07	6.61239e+07	6.34943e+07	10	13	12	9	12	10	10	9	10	High	High	High	High	High	High	High
AN10030-T-p1	transcript=AN10030-T | gene=AN10030 | organism=Aspergillus_nidulans_FGSC_A4 | gene_product=Putative alkaline serine protease | transcript_product=Putative alkaline serine protease | location=ChrVIII_A_nidulans_FGSC_A4:4185494-4187032(+) | protein_length=477 | sequence_SO=chromosome | SO=protein_coding | is_pseudo=false	35	932	12	12	0	477	50.4	6.21	7203	62691.8	604.29	0	78.405		7.67555e+08	4.14581e+08	4.15161e+08	4.72416e+08	4.49782e+08	4.59281e+08	3.6973e+08	4.73609e+08	5.3553e+08	7.67555e+08	3.80609e+08	2.80166e+08	2.57893e+08	1.85288e+08	1.95651e+08	2.09958e+08	2.58323e+08	2.48362e+08	10	11	9	11	10	10	10	10	8	High	High	High	High	High	High	High
AN0570-T-p1	transcript=AN0570-T | gene=AN0570 | organism=Aspergillus_nidulans_FGSC_A4 | gene_product=Ortholog(s) have RNA binding, structural constituent of ribosome activity, role in cytoplasmic translation and cytosolic large ribosomal subunit, nucleolus, yeast-form cell wall localization | transcript_product=Ortholog(s) have RNA binding, structural constituent of ribosome activity, role in cytoplasmic tra…	41	931	8	8	0	134	15.2	11.02	4994	55289.9	570.01	0	49.793		1.18839e+09	8.33244e+08	7.06762e+08	6.97662e+08	1.07217e+09	1.09845e+09	5.64963e+08	4.91908e+08	3.03706e+08	1.18839e+09	7.64965e+08	4.7695e+08	3.80856e+08	4.41681e+08	4.67936e+08	3.20825e+08	2.68304e+08	1.40849e+08	7	8	8	8	5	6	5	6	9	High	High	High	High	High	High	High
AN5907-T-p1	transcript=AN5907-T | gene=AN5907 | organism=Aspergillus_nidulans_FGSC_A4 | gene_product=Putative ribose-5-phosphate isomerase | transcript_product=Putative ribose-5-phosphate isomerase | location=ChrI_A_nidulans_FGSC_A4:1844323-1844796(+) | protein_length=157 | sequence_SO=chromosome | SO=protein_coding | is_pseudo=false	55	922	8	8	0	157	16.9	7.28	3965	48560.6	381.2	0	51.652		3.80478e+08	3.39287e+08	3.47173e+08	4.40354e+08	4.8174e+08	5.09517e+08	7.20018e+08	7.70876e+08	8.20644e+08	3.80478e+08	3.11485e+08	2.34286e+08	2.40391e+08	1.98453e+08	2.17052e+08	4.08876e+08	4.20463e+08	3.80589e+08	7	8	6	7	8	8	8	7	7	High	High	High	High	High	High	High
AN6717-T-p1	transcript=AN6717-T | gene=AN6717 | organism=Aspergillus_nidulans_FGSC_A4 | gene_product=Putative mitochondrial malate dehydrogenase with a predicted role in the TCA cycle | transcript_product=Putative mitochondrial malate dehydrogenase with a predicted role in the TCA cycle | location=ChrI_A_nidulans_FGSC_A4:2957682-2958968(+) | protein_length=340 | sequence_SO=chromosome | SO=protein_coding | i…	36	909	11	10	0	340	35.7	8.78	7695	61872.3	618.67	0	61.007		1.40247e+08	1.77447e+08	1.6126e+08	3.28673e+08	2.22815e+08	1.43391e+08	2.54198e+08	1.96366e+08	1.81769e+08	1.40247e+08	1.62906e+08	1.08824e+08	1.79424e+08	9.17885e+07	6.10837e+07	1.44351e+08	1.07105e+08	8.42991e+07	9	9	9	8	8	9	9	9	9	High	High	High	High	High	High	High
AN2885-T-p1	transcript=AN2885-T | gene=AN2885 | organism=Aspergillus_nidulans_FGSC_A4 | gene_product=High-mobility group (HMG) protein with a predicted role in sequence-specific DNA binding, RNA polymerase III transcriptional preinitiation complex assembly and chromatin remodeling | transcript_product=High-mobility group (HMG) protein with a predicted role in sequence-specific DNA binding, RNA polymerase III…	20	899	3	3	0	106	12	9.35	8001	79987.8	943.33	0	30.758		9.12116e+07	3.11537e+08	1.96198e+08	1.93229e+08	2.01281e+08	1.61931e+08	1.49619e+08	1.32175e+08	1.10742e+08	9.12116e+07	2.86009e+08	1.32402e+08	1.05484e+08	8.29175e+07	6.89816e+07	8.49639e+07	7.20931e+07	5.13586e+07	3	3	3	3	3	3	3	3	3	High	High	High	High	High	High	High
AN6287-T-p1	transcript=AN6287-T | gene=AN6287 | organism=Aspergillus_nidulans_FGSC_A4 | gene_product=Putative F1F0-ATPase complex subunit with a predicted role in energy metabolism | transcript_product=Putative F1F0-ATPase complex subunit with a predicted role in energy metabolism | location=ChrI_A_nidulans_FGSC_A4:648415-649427(+) | protein_length=227 | sequence_SO=chromosome | SO=protein_coding | is_pseudo…	35	898	7	7	0	227	23.7	9.55	6471	61280.3	615.09	0	43.835		2.91592e+08	1.86107e+08	2.00537e+08	2.84871e+08	2.01982e+08	2.88208e+08	3.99698e+08	3.17675e+08	3.06308e+08	2.91592e+08	1.70857e+08	1.3533e+08	1.55512e+08	8.32063e+07	1.22775e+08	2.26976e+08	1.73271e+08	1.42056e+08	7	7	7	6	7	6	7	7	7	High	High	High	High	High	High	High
AN4073-T-p1	transcript=AN4073-T | gene=AN4073 | organism=Aspergillus_nidulans_FGSC_A4 | gene_product=Putative cytosolic small ribosomal subunit protein S12 | transcript_product=Putative cytosolic small ribosomal subunit protein S12 | location=ChrII_A_nidulans_FGSC_A4:2178435-2179087(-) | protein_length=150 | sequence_SO=chromosome | SO=protein_coding | is_pseudo=false	52	895	5	5	0	150	16.4	5	5972	51252.4	354.48	0	35.747	Acetyl [N-Term]	1.98472e+08	2.7675e+07	3.1249e+08	2.30598e+08	2.03146e+08	1.80923e+08	2.01633e+08	1.40591e+08	4.42677e+08	1.98472e+08	2.54072e+07	2.1088e+08	1.25884e+08	8.36859e+07	7.70721e+07	1.14501e+08	7.66831e+07	2.053e+08	4	5	4	4	5	4	5	5	5	High	High	High	High	High	High	High
AN10946-T-p1	transcript=AN10946-T | gene=AN10946 | organism=Aspergillus_nidulans_FGSC_A4 | gene_product=Ortholog of A. fumigatus Af293 : Afu6g09920, A. niger CBS 513.88 : An11g07970, A. oryzae RIB40 : AO090001000626, Neosartorya fischeri NRRL 181 : NFIA_055650 and Aspergillus wentii : Aspwe1_0045804 | transcript_product=Ortholog of A. fumigatus Af293 : Afu6g09920, A. niger CBS 513.88 : An11g07970, A. oryzae R…	36	893	21	21	0	704	74.5	9.26	5185	64516.5	649.9	0	135.503		1.7467e+08	1.60979e+08	1.86581e+08	2.15288e+08	2.33335e+08	2.52302e+08	2.03367e+08	1.84698e+08	2.32419e+08	1.7467e+08	1.47788e+08	1.25912e+08	1.17526e+08	9.61223e+07	1.07479e+08	1.15486e+08	1.00741e+08	1.07789e+08	15	15	17	19	18	16	16	16	15	High	High	High	High	High	High	High
AN2248-T-p1	transcript=AN2248-T | gene=AN2248 | organism=Aspergillus_nidulans_FGSC_A4 | gene_product=Putative 4-aminobutyrate transaminase, required for utilization of gamma-aminobutyric acid (GABA) | transcript_product=Putative 4-aminobutyrate transaminase, required for utilization of gamma-aminobutyric acid (GABA) | location=ChrVII_A_nidulans_FGSC_A4:3321654-3323324(-) | protein_length=498 | sequence_SO=ch…	39	890	15	15	0	498	55.5	8.91	5846	64167.6	659.79	0	109.945		1.26492e+08	2.4332e+08	1.85073e+08	1.08266e+08	1.06337e+08	1.34157e+08	1.05194e+08	1.42685e+08	1.04689e+08	1.26492e+08	2.23381e+08	1.24894e+08	5.91026e+07	4.38057e+07	5.71503e+07	5.97365e+07	7.78256e+07	4.85515e+07	12	11	11	12	12	12	11	11	12	High	High	High	High	High	High	High
AN9124-T-p1	transcript=AN9124-T | gene=AN9124 | organism=Aspergillus_nidulans_FGSC_A4 | gene_product=Ortholog(s) have ATPase inhibitor activity, Hsp70 protein binding, Hsp90 protein binding, mRNA binding activity, role in protein folding, protein localization and cytosol, nucleus localization | transcript_product=Ortholog(s) have ATPase inhibitor activity, Hsp70 protein binding, Hsp90 protein binding, mRNA b…	41	881	18	18	0	575	63.5	5.47	6064	69928.4	676.51	0	162.702		2.79691e+08	3.02574e+08	4.06808e+08	3.93689e+08	4.3765e+08	4.81808e+08	3.63181e+08	4.07702e+08	5.69914e+08	2.79691e+08	2.77781e+08	2.7453e+08	2.14916e+08	1.8029e+08	2.05248e+08	2.06239e+08	2.22375e+08	2.64309e+08	14	16	15	14	15	16	16	15	12	High	High	High	High	High	High	High
Afu1g01000-T-p1	transcript=Afu1g01000-T | gene=Afu1g01000 | organism=Aspergillus_fumigatus_Af293 | gene_product=Putative oxidoreductase, 2OG-Fe(II) oxygenase family protein | transcript_product=Putative oxidoreductase, 2OG-Fe(II) oxygenase family protein | location=Chr1_A_fumigatus_Af293:349732-351003(-) | protein_length=385 | sequence_SO=chromosome | SO=protein_coding | is_pseudo=false	24	879	8	8	0	385	42.6	5.58	6074	61025.2	567.52	0	56.5		2.2882e+08	3.76066e+08	3.8924e+08	3.66754e+08	3.37915e+08	3.36047e+08	4.13425e+08	3.8878e+08	2.67683e+08	2.2882e+08	3.4525e+08	2.62674e+08	2.00212e+08	1.39204e+08	1.43154e+08	2.34771e+08	2.12054e+08	1.24143e+08	8	7	7	7	7	7	7	7	7	High	High	High	High	High	High	High
AN4163-T-p1	transcript=AN4163-T | gene=AN4163 | organism=Aspergillus_nidulans_FGSC_A4 | gene_product=Protein with seven WD repeats, involved in cross-pathway control of the response to amino acid starvation | transcript_product=Protein with seven WD repeats, involved in cross-pathway control of the response to amino acid starvation | location=ChrII_A_nidulans_FGSC_A4:1903595-1905024(+) | protein_length=316 |…	56	878	13	13	0	316	35	6.84	6019	62757.7	532.55	0	92.433	Acetyl [N-Term]	2.22987e+08	1.71563e+08	1.50043e+08	1.69159e+08	1.59981e+08	1.96161e+08	1.75201e+08	3.43613e+08	2.93835e+08	2.22987e+08	1.57505e+08	1.01255e+08	9.23446e+07	6.59043e+07	8.35637e+07	9.94912e+07	1.87419e+08	1.36271e+08	10	9	10	10	11	10	11	13	11	High	High	High	High	High	High	High
AN10350-T-p1	transcript=AN10350-T | gene=AN10350 | organism=Aspergillus_nidulans_FGSC_A4 | gene_product=Ortholog(s) have cytosol, nucleus localization | transcript_product=Ortholog(s) have cytosol, nucleus localization | location=ChrVI_A_nidulans_FGSC_A4:2303684-2306732(+) | protein_length=910 | sequence_SO=chromosome | SO=protein_coding | is_pseudo=false	27	873	23	23	0	910	104	6.19	5852	63766.2	603.18	0	146.29		1.21556e+08	2.90077e+08	2.23962e+08	2.00638e+08	2.23893e+08	2.38735e+08	2.13856e+08	1.80711e+08	1.81687e+08	1.21556e+08	2.66307e+08	1.51138e+08	1.09529e+08	9.22326e+07	1.017e+08	1.21442e+08	9.8566e+07	8.42608e+07	18	21	20	21	21	19	18	19	20	High	High	High	High	High	High	High
AN12475-T-p1	transcript=AN12475-T | gene=AN12475 | organism=Aspergillus_nidulans_FGSC_A4 | gene_product=Ortholog(s) have eukaryotic initiation factor 4G binding, mRNA binding, single-stranded telomeric DNA binding activity and role in negative regulation of translation in response to stress | transcript_product=Ortholog(s) have eukaryotic initiation factor 4G binding, mRNA binding, single-stranded telomeric D…	27	870	9	9	0	354	37.7	8.66	5589	56528.2	508.55	0	49.611		1.60761e+08	3.54122e+08	4.05334e+08	3.60984e+08	3.86205e+08	3.68263e+08	2.97154e+08	3.21048e+08	3.61487e+08	1.60761e+08	3.25104e+08	2.73535e+08	1.97062e+08	1.59097e+08	1.56878e+08	1.68745e+08	1.75111e+08	1.67646e+08	8	8	8	8	7	7	7	8	8	High	High	High	High	High	High	High
AN11062-T-p1	transcript=AN11062-T | gene=AN11062 | organism=Aspergillus_nidulans_FGSC_A4 | gene_product=Ortholog(s) have role in mitochondrial genome maintenance and mitochondrial matrix localization | transcript_product=Ortholog(s) have role in mitochondrial genome maintenance and mitochondrial matrix localization | location=ChrII_A_nidulans_FGSC_A4:1253892-1254446(+) | protein_length=128 | sequence_SO=chrom…	58	868	5	5	0	128	13.8	6.29	7440	68854.9	620.18	0	61.424		4.98655e+07	7.05033e+07	5.14538e+07	4.3572e+07	6.11037e+07	5.85569e+07	9.62531e+07	1.18254e+08	1.70376e+08	4.98655e+07	6.4726e+07	3.4723e+07	2.37861e+07	2.51717e+07	2.4945e+07	5.46592e+07	6.44997e+07	7.90154e+07	5	5	5	6	5	5	6	5	5	High	High	High	High	High	High	High
AN6232-T-p1	transcript=AN6232-T | gene=AN6232 | organism=Aspergillus_nidulans_FGSC_A4 | gene_product=Putative F1F0-ATPase complex subunit with a predicted role in energy metabolism | transcript_product=Putative F1F0-ATPase complex subunit with a predicted role in energy metabolism | location=ChrI_A_nidulans_FGSC_A4:816477-818559(+) | protein_length=507 | sequence_SO=chromosome | SO=protein_coding | is_pseudo…	38	865	18	18	0	507	56.7	5.83	7380	63425	527.45	0	137.649		1.59365e+08	1.64143e+08	1.25379e+08	1.8701e+08	2.21828e+08	1.95183e+08	1.93399e+08	1.80216e+08	2.04305e+08	1.59365e+08	1.50692e+08	8.46104e+07	1.02089e+08	9.13819e+07	8.31471e+07	1.09826e+08	9.82961e+07	9.47503e+07	16	11	13	12	14	13	11	13	12	High	High	High	High	High	High	High
AN2120-T-p1	transcript=AN2120-T | gene=AN2120 | organism=Aspergillus_nidulans_FGSC_A4 | gene_product=Putative karyopherin (importin) beta 3 | transcript_product=Putative karyopherin (importin) beta 3 | location=ChrVII_A_nidulans_FGSC_A4:2925432-2928970(+) | protein_length=1093 | sequence_SO=chromosome | SO=protein_coding | is_pseudo=false	30	864	31	31	0	1093	121.4	4.69	6110	60732.8	577.77	0	156.541		3.2604e+08	3.1292e+08	3.67861e+08	4.10521e+08	3.9437e+08	3.90239e+08	5.27722e+08	2.67749e+08	2.87307e+08	3.2604e+08	2.87279e+08	2.48246e+08	2.24104e+08	1.62461e+08	1.6624e+08	2.99677e+08	1.4604e+08	1.33244e+08	23	23	23	25	23	25	24	22	18	High	High	High	High	High	High	High
AN3843-T-p1	transcript=AN3843-T | gene=AN3843 | organism=Aspergillus_nidulans_FGSC_A4 | gene_product=Ortholog(s) have role in cristae formation, protein import into mitochondrial intermembrane space and MICOS complex, mitochondrial crista, mitochondrial crista junction, plasma membrane localization | transcript_product=Ortholog(s) have role in cristae formation, protein import into mitochondrial intermembran…	25	861	16	16	0	618	68.6	5.62	7863	64043.6	651.72	0	98.587		1.13259e+08	9.62505e+07	2.05163e+08	2.5978e+08	2.41259e+08	3.13726e+08	2.3274e+08	2.31403e+08	1.70028e+08	1.13259e+08	8.83634e+07	1.38452e+08	1.41815e+08	9.93865e+07	1.33646e+08	1.32166e+08	1.26215e+08	7.88537e+07	15	13	14	16	15	16	16	13	14	High	High	High	High	High	High	High
AN6048-T-p1	transcript=AN6048-T | gene=AN6048 | organism=Aspergillus_nidulans_FGSC_A4 | gene_product=Putative aspartate transaminase with a predicted role in amino acid metabolism | transcript_product=Putative aspartate transaminase with a predicted role in amino acid metabolism | location=ChrI_A_nidulans_FGSC_A4:1421764-1423316(+) | protein_length=445 | sequence_SO=chromosome | SO=protein_coding | is_pseudo…	19	858	7	7	0	445	48.7	7.2	8816	69454.6	645.77	0	60.013		1.4588e+08	1.32924e+08	1.86693e+08	1.74194e+08	1.36297e+08	2.08263e+08	3.081e+08	2.07026e+08	1.95396e+08	1.4588e+08	1.22031e+08	1.25988e+08	9.50931e+07	5.61474e+07	8.8719e+07	1.74961e+08	1.12919e+08	9.06185e+07	7	8	8	8	7	8	8	8	7	High	High	High	High	High	High	High
AN0641-T-p1	transcript=AN0641-T | gene=AN0641 | organism=Aspergillus_nidulans_FGSC_A4 | gene_product=TCTP (translationally controlled tumor protein) | transcript_product=TCTP (translationally controlled tumor protein) | location=ChrVIII_A_nidulans_FGSC_A4:2919417-2920225(-) | protein_length=179 | sequence_SO=chromosome | SO=protein_coding | is_pseudo=false	18	846	5	5	0	179	20	4.83	5310	51659.8	465.95	0	28.593		5.69413e+08	2.20432e+08	2.70447e+08	2.17132e+08	4.76073e+08	5.00587e+08	3.09665e+08	4.0596e+08	3.15874e+08	5.69413e+08	2.02369e+08	1.82508e+08	1.18533e+08	1.96118e+08	2.13248e+08	1.75849e+08	2.21425e+08	1.46493e+08	5	5	4	5	5	5	5	5	4	High	High	High	High	High	High	High
AN1810-T-p1	transcript=AN1810-T | gene=AN1810 | organism=Aspergillus_nidulans_FGSC_A4 | gene_product=Ornithine transaminase, involved in utilization of arginine as a proline source | transcript_product=Ornithine transaminase, involved in utilization of arginine as a proline source | location=ChrVII_A_nidulans_FGSC_A4:1959191-1960660(-) | protein_length=454 | sequence_SO=chromosome | SO=protein_coding | is_ps…	39	838	13	13	0	454	49.2	6.05	7361	69690.1	734.36	0	93.783		7.958e+07	1.50467e+08	1.41258e+08	1.07861e+08	1.1104e+08	1.28666e+08	1.0912e+08	1.29767e+08	2.1522e+08	7.958e+07	1.38137e+08	9.5326e+07	5.88818e+07	4.57431e+07	5.48112e+07	6.1966e+07	7.07795e+07	9.98125e+07	11	12	12	11	12	11	12	9	11	High	High	High	High	High	High	High
AN0433-T-p1	transcript=AN0433-T | gene=AN0433 | organism=Aspergillus_nidulans_FGSC_A4 | gene_product=Ortholog(s) have cell surface, cytosolic large ribosomal subunit, nucleolus localization | transcript_product=Ortholog(s) have cell surface, cytosolic large ribosomal subunit, nucleolus localization | location=ChrVIII_A_nidulans_FGSC_A4:3564138-3565141(+) | protein_length=174 | sequence_SO=chromosome | SO=pro…	39	835	8	8	0	174	20.4	10.64	6169	59687.8	553.17	0	50.887		2.30449e+08	1.0255e+08	1.28752e+08	1.62748e+08	2.43418e+08	1.4439e+08	1.48491e+08	1.43474e+08	1.50711e+08	2.30449e+08	9.41472e+07	8.68871e+07	8.88448e+07	1.00276e+08	6.15095e+07	8.43236e+07	7.82559e+07	6.98951e+07	8	7	9	9	9	9	8	8	7	High	High	High	High	High	High	High
AN5713-T-p1	transcript=AN5713-T | gene=AN5713 | organism=Aspergillus_nidulans_FGSC_A4 | gene_product=Putative chaperonin complex component, TCP-1 eta subunit | transcript_product=Putative chaperonin complex component, TCP-1 eta subunit | location=ChrV_A_nidulans_FGSC_A4:1913003-1915026(+) | protein_length=563 | sequence_SO=chromosome | SO=protein_coding | is_pseudo=false	36	831	17	17	0	563	60.8	6.48	6871	59065.1	573.94	0	106.518		1.45889e+08	9.02205e+07	1.11317e+08	1.69654e+08	1.25894e+08	1.11607e+08	1.01625e+08	7.80512e+07	1.20957e+08	1.45889e+08	8.28276e+07	7.51211e+07	9.26149e+07	5.18621e+07	4.7544e+07	5.77097e+07	4.25718e+07	5.60963e+07	13	14	12	14	14	14	14	14	12	High	High	High	High	High	High	High
AN4015-T-p1	transcript=AN4015-T | gene=AN4015 | organism=Aspergillus_nidulans_FGSC_A4 | gene_product=Ortholog(s) have ribosome binding, translation elongation factor activity, translation initiation factor activity | transcript_product=Ortholog(s) have ribosome binding, translation elongation factor activity, translation initiation factor activity | location=ChrII_A_nidulans_FGSC_A4:2334681-2335507(-) | prot…	48	827	8	8	0	159	17.6	5.17	8280	72056.8	771.11	0	96.913		8.97231e+07	1.50295e+08	1.65062e+08	4.38015e+08	5.0641e+08	5.33855e+08	6.04706e+08	8.93463e+08	2.21099e+09	8.97231e+07	1.37979e+08	1.1139e+08	2.39114e+08	2.08616e+08	2.27419e+08	3.43394e+08	4.87326e+08	1.02539e+09	7	9	6	9	9	8	7	8	8	High	High	High	High	High	High	High
AN4997-T-p1	transcript=AN4997-T | gene=AN4997 | organism=Aspergillus_nidulans_FGSC_A4 | gene_product=Ortholog(s) have phosphatidylcholine transporter activity, phosphatidylinositol transporter activity | transcript_product=Ortholog(s) have phosphatidylcholine transporter activity, phosphatidylinositol transporter activity | location=ChrIII_A_nidulans_FGSC_A4:336636-337760(+) | protein_length=327 | sequence_S…	48	821	15	15	0	327	36.8	5.82	3940	51940.6	508.04	0	70.6		3.00752e+08	3.10959e+08	3.20757e+08	2.62473e+08	2.57082e+08	2.95239e+08	3.37623e+08	2.81911e+08	2.74906e+08	3.00752e+08	2.85478e+08	2.16459e+08	1.43285e+08	1.05905e+08	1.2577e+08	1.91726e+08	1.53764e+08	1.27493e+08	12	12	11	12	12	12	11	12	9	High	High	High	High	High	High	High
AN9407-T-p1	transcript=AN9407-T | gene=AN9407 | organism=Aspergillus_nidulans_FGSC_A4 | gene_product=Fatty acid synthase, alpha subunit | transcript_product=Fatty acid synthase, alpha subunit | location=ChrVIII_A_nidulans_FGSC_A4:532978-538683(-) | protein_length=1860 | sequence_SO=chromosome | SO=protein_coding | is_pseudo=false	20	817	32	32	0	1860	204.9	6.02	5859	55894.9	516.64	0	148.065		3.76509e+08	2.96603e+08	2.26856e+08	2.78224e+08	2.55492e+08	1.93057e+08	1.84108e+08	1.37385e+08	2.09241e+08	3.76509e+08	2.72299e+08	1.53091e+08	1.51883e+08	1.0525e+08	8.22414e+07	1.04549e+08	7.49343e+07	9.70396e+07	26	25	23	26	27	25	22	22	24	High	High	High	High	High	High	High
AN4575-T-p1	transcript=AN4575-T | gene=AN4575 | organism=Aspergillus_nidulans_FGSC_A4 | gene_product=Ortholog of A. oryzae RIB40 : AO090011000461, Aspergillus flavus NRRL 3357 : AFL2T_05228, Aspergillus versicolor : Aspve1_0042983 and Aspergillus sydowii : Aspsy1_0091136 | transcript_product=Ortholog of A. oryzae RIB40 : AO090011000461, Aspergillus flavus NRRL 3357 : AFL2T_05228, Aspergillus versicolor : Asp…	22	814	6	6	0	357	36	4.32	9148	65200.7	666.95	0	61.366		8.94914e+08	8.62318e+08	1.00445e+09	1.03807e+09	6.96777e+08	7.47411e+08	8.07744e+08	9.20843e+08	1.08125e+09	8.94914e+08	7.91657e+08	6.7784e+08	5.66685e+08	2.87037e+08	3.18393e+08	4.58693e+08	5.0226e+08	5.0145e+08	6	5	6	5	6	6	5	6	5	High	High	High	High	High	High	High
AN5895-T-p1	transcript=AN5895-T | gene=AN5895 | organism=Aspergillus_nidulans_FGSC_A4 | gene_product=Putative Rab GDP-dissociation inhibitor | transcript_product=Putative Rab GDP-dissociation inhibitor | location=ChrI_A_nidulans_FGSC_A4:1870446-1872187(+) | protein_length=468 | sequence_SO=chromosome | SO=protein_coding | is_pseudo=false	29	814	12	12	0	468	52.3	5.45	4255	54504.4	501.77	0	78.588		2.48509e+08	3.40115e+08	3.73396e+08	3.60528e+08	3.11468e+08	3.26484e+08	2.87642e+08	5.06282e+08	2.70529e+08	2.48509e+08	3.12245e+08	2.51982e+08	1.96813e+08	1.28309e+08	1.39081e+08	1.63343e+08	2.76144e+08	1.25463e+08	10	12	12	11	11	11	12	12	12	High	High	High	High	High	High	High
AN9468-T-p1	transcript=AN9468-T | gene=AN9468 | organism=Aspergillus_nidulans_FGSC_A4 | gene_product=Ortholog(s) have role in DNA recombination, maturation of SSU-rRNA from tricistronic rRNA transcript (SSU-rRNA, 5.8S rRNA, LSU-rRNA) and 90S preribosome, cytosol localization | transcript_product=Ortholog(s) have role in DNA recombination, maturation of SSU-rRNA from tricistronic rRNA transcript (SSU-rRNA, 5.…	73	811	13	13	0	143	15.9	10.18	4359	47453.8	463.67	0	69.269	Acetyl [N-Term]	8.00405e+08	5.88502e+08	5.08892e+08	7.09143e+08	3.8647e+08	4.46853e+08	4.95842e+08	6.83874e+08	3.94135e+08	8.00405e+08	5.40278e+08	3.43419e+08	3.87123e+08	1.59206e+08	1.90357e+08	2.81573e+08	3.73009e+08	1.82788e+08	12	9	10	12	10	11	9	9	9	High	High	High	High	High	High	High
AN5996-T-p1	transcript=AN5996-T | gene=AN5996 | organism=Aspergillus_nidulans_FGSC_A4 | gene_product=60S acidic ribosomal protein P2, putative | transcript_product=60S acidic ribosomal protein P2, putative | location=ChrI_A_nidulans_FGSC_A4:1558420-1558811(-) | protein_length=109 | sequence_SO=chromosome | SO=protein_coding | is_pseudo=false	62	807	5	5	0	109	10.9	4.22	8576	63644.4	611.04	0	42.179		4.00226e+08	3.25051e+08	3.82229e+08	3.87767e+08	4.75686e+08	3.58928e+08	3.19649e+08	2.82966e+08	3.32286e+08	4.00226e+08	2.98415e+08	2.57943e+08	2.11683e+08	1.95959e+08	1.52901e+08	1.81519e+08	1.54339e+08	1.54104e+08	5	4	5	5	5	5	4	4	4	High	High	High	High	High	High	High
AN6838-T-p1	transcript=AN6838-T | gene=AN6838 | organism=Aspergillus_nidulans_FGSC_A4 | gene_product=Beta-tubulin, highly conserved component of microtubules | transcript_product=Beta-tubulin, highly conserved component of microtubules | location=ChrI_A_nidulans_FGSC_A4:3345187-3346833(+) | protein_length=449 | sequence_SO=chromosome | SO=protein_coding | is_pseudo=false	18	803	8	3	0	449	50	4.91	5627	50008	403.08	0	51.896		1.20493e+07	1.65362e+07	2.19783e+07	1.46917e+07	3.16517e+07	2.11514e+07	2.26027e+07	3.24631e+07	2.9459e+07	1.20493e+07	1.51812e+07	1.48318e+07	8.02022e+06	1.30389e+07	9.0104e+06	1.28354e+07	1.77065e+07	1.36622e+07	3	3	3	3	3	3	3	3	3	High	High	High	High	High	High	High
AN2734-T-p1	transcript=AN2734-T | gene=AN2734 | organism=Aspergillus_nidulans_FGSC_A4 | gene_product=Ortholog(s) have large ribosomal subunit rRNA binding, structural constituent of ribosome activity and role in cytoplasmic translation, ribosomal large subunit assembly | transcript_product=Ortholog(s) have large ribosomal subunit rRNA binding, structural constituent of ribosome activity and role in cytoplasm…	31	800	8	8	0	312	33.4	4.93	6100	62893.1	582.84	0	64.323		4.80651e+08	2.91224e+08	2.51601e+08	2.76321e+08	4.59442e+08	3.53963e+08	2.8591e+08	3.3346e+08	4.02361e+08	4.80651e+08	2.67361e+08	1.6979e+08	1.50845e+08	1.89267e+08	1.50786e+08	1.6236e+08	1.81881e+08	1.86603e+08	8	7	7	8	6	7	7	7	6	High	High	High	High	High	High	High
AN6639-T-p1	transcript=AN6639-T | gene=AN6639 | organism=Aspergillus_nidulans_FGSC_A4 | gene_product=Putative 2-methylcitrate dehydratase with a predicted role in lysine metabolism | transcript_product=Putative 2-methylcitrate dehydratase with a predicted role in lysine metabolism | location=ChrI_A_nidulans_FGSC_A4:2698843-2700925(+) | protein_length=635 | sequence_SO=chromosome | SO=protein_coding | is_pseu…	24	799	15	15	0	635	70.4	8.82	3907	46941.3	398	0	91.903		1.49953e+08	1.23033e+08	1.41011e+08	1.36519e+08	1.67109e+08	1.63763e+08	2.5356e+08	1.81539e+08	1.69151e+08	1.49953e+08	1.12951e+08	9.51597e+07	7.45259e+07	6.88405e+07	6.97622e+07	1.43989e+08	9.90176e+07	7.84471e+07	14	13	13	13	14	13	12	13	11	High	High	High	High	High	High	High
AN6169-T-p1	transcript=AN6169-T | gene=AN6169 | organism=Aspergillus_nidulans_FGSC_A4 | gene_product=Ortholog of A. fumigatus Af293 : Afu2g08290, A. niger CBS 513.88 : An05g00900, A. oryzae RIB40 : AO090011000875, Aspergillus wentii : Aspwe1_0674836 and Aspergillus sydowii : Aspsy1_0058068 | transcript_product=Ortholog of A. fumigatus Af293 : Afu2g08290, A. niger CBS 513.88 : An05g00900, A. oryzae RIB40 : AO…	37	793	25	25	0	734	83.5	7.84	5411	52843.9	547.12	0	138.104		1.9561e+08	2.07391e+08	1.79417e+08	2.07581e+08	1.87037e+08	2.38464e+08	1.91548e+08	2.84096e+08	3.10522e+08	1.9561e+08	1.90397e+08	1.21077e+08	1.13319e+08	7.70498e+07	1.01584e+08	1.08774e+08	1.54956e+08	1.4401e+08	20	20	22	20	19	20	21	20	17	High	High	High	High	High	High	High
AN8979-T-p1	transcript=AN8979-T | gene=AN8979 | organism=Aspergillus_nidulans_FGSC_A4 | gene_product=Alcohol dehydrogenase with a role in two-carbon compound metabolism | transcript_product=Alcohol dehydrogenase with a role in two-carbon compound metabolism | location=ChrVII_A_nidulans_FGSC_A4:230971-232138(+) | protein_length=350 | sequence_SO=chromosome | SO=protein_coding | is_pseudo=false	46	793	12	11	0	350	37.1	7.69	6388	75124.5	767.45	0	97.544		1.61947e+08	1.20617e+08	1.10143e+08	2.46281e+08	3.9464e+08	2.8716e+08	3.37795e+08	2.25929e+08	1.66073e+08	1.61947e+08	1.10733e+08	7.43284e+07	1.34445e+08	1.62572e+08	1.22329e+08	1.91823e+08	1.2323e+08	7.70196e+07	8	9	10	7	9	8	9	8	11	High	High	High	High	High	High	High
AN1534-T-p1	transcript=AN1534-T | gene=AN1534 | organism=Aspergillus_nidulans_FGSC_A4 | gene_product=Putative F1F0-ATPase complex subunit with a predicted role in energy metabolism | transcript_product=Putative F1F0-ATPase complex subunit with a predicted role in energy metabolism | location=ChrVII_A_nidulans_FGSC_A4:1084416-1085348(+) | protein_length=242 | sequence_SO=chromosome | SO=protein_coding | is_ps…	31	792	7	7	0	242	26.4	9.19	7128	52332.3	601.59	0	39.368		6.02316e+08	2.49236e+08	3.43442e+08	2.66984e+08	1.79557e+08	3.16278e+08	3.81657e+08	2.96991e+08	2.46133e+08	6.02316e+08	2.28813e+08	2.31768e+08	1.45748e+08	7.39686e+07	1.34733e+08	2.16731e+08	1.61989e+08	1.14149e+08	7	5	5	6	6	7	6	6	6	High	High	High	High	High	High	High
AN8118-T-p1	transcript=AN8118-T | gene=AN8118 | organism=Aspergillus_nidulans_FGSC_A4 | gene_product=Putative cytochrome c oxidase subunit with a predicted role in energy metabolism | transcript_product=Putative cytochrome c oxidase subunit with a predicted role in energy metabolism | location=ChrII_A_nidulans_FGSC_A4:808540-809334(+) | protein_length=157 | sequence_SO=chromosome | SO=protein_coding | is_pse…	42	790	7	7	0	157	17.9	5.68	5220	56779	617.43	0	41.016		5.83099e+08	1.78195e+08	1.9038e+08	1.43308e+08	1.79495e+08	1.84321e+08	1.48987e+08	1.20762e+08	1.65493e+08	5.83099e+08	1.63593e+08	1.28476e+08	7.8232e+07	7.39427e+07	7.85199e+07	8.46052e+07	6.58678e+07	7.67507e+07	5	6	5	5	5	6	5	6	5	High	High	High	High	High	High	High
AN0046-T-p1	transcript=AN0046-T | gene=AN0046 | organism=Aspergillus_nidulans_FGSC_A4 | gene_product=Putative histidyl-tRNA synthetase with a predicted role in tRNA aminoacylation | transcript_product=Putative histidyl-tRNA synthetase with a predicted role in tRNA aminoacylation | location=ChrVIII_A_nidulans_FGSC_A4:4762495-4764355(+) | protein_length=549 | sequence_SO=chromosome | SO=protein_coding | is_pse…	32	785	16	16	0	549	61.4	8.03	5894	40675.6	479.07	0	81.934		1.46066e+08	2.39431e+08	2.12891e+08	1.40042e+08	1.62869e+08	1.31228e+08	1.30665e+08	1.96612e+08	2.11881e+08	1.46066e+08	2.19812e+08	1.43667e+08	7.64491e+07	6.70938e+07	5.59024e+07	7.42006e+07	1.07239e+08	9.82639e+07	10	12	11	13	13	12	11	9	13	High	High	High	High	High	High	High
AN7105-T-p1	transcript=AN7105-T | gene=AN7105 | organism=Aspergillus_nidulans_FGSC_A4 | gene_product=Putative translation initiation factor 3, subunit c (eIF-3c) | transcript_product=Putative translation initiation factor 3, subunit c (eIF-3c) | location=ChrIV_A_nidulans_FGSC_A4:1000690-1003371(-) | protein_length=860 | sequence_SO=chromosome | SO=protein_coding | is_pseudo=false	33	785	26	26	0	860	97.1	5.21	7377	61419.9	637.02	0	142.896		2.66286e+08	3.18411e+08	3.40252e+08	3.71447e+08	3.66841e+08	3.26931e+08	3.84867e+08	3.2279e+08	4.02592e+08	2.66286e+08	2.9232e+08	2.29615e+08	2.02774e+08	1.5112e+08	1.39271e+08	2.18554e+08	1.76061e+08	1.8671e+08	22	22	23	24	20	21	22	22	21	High	High	High	High	High	High	High
AN7350-T-p1	transcript=AN7350-T | gene=AN7350 | organism=Aspergillus_nidulans_FGSC_A4 | gene_product=Has domain(s) with predicted nucleic acid binding, nucleotide binding activity | transcript_product=Has domain(s) with predicted nucleic acid binding, nucleotide binding activity | location=ChrIV_A_nidulans_FGSC_A4:215003-216338(-) | protein_length=428 | sequence_SO=chromosome | SO=protein_coding | is_pseudo=…	24	782	10	10	0	428	46.3	9.1	8323	63089.5	618.98	0	60.508		1.51126e+08	1.30992e+08	1.00888e+08	1.54103e+08	4.00778e+08	1.61552e+08	1.14683e+08	1.11261e+08	1.26293e+08	1.51126e+08	1.20258e+08	6.80833e+07	8.41252e+07	1.651e+08	6.88202e+07	6.51249e+07	6.06858e+07	5.85707e+07	10	9	9	9	9	8	8	9	9	High	High	High	High	High	High	High
AN2317-T-p1	transcript=AN2317-T | gene=AN2317 | organism=Aspergillus_nidulans_FGSC_A4 | gene_product=Predicted actin depolymerizing protein with similarity to Saccharomyces cerevisiae Cof1p | transcript_product=Predicted actin depolymerizing protein with similarity to Saccharomyces cerevisiae Cof1p | location=ChrVII_A_nidulans_FGSC_A4:3536917-3537654(-) | protein_length=154 | sequence_SO=chromosome | SO=prot…	27	778	3	3	0	154	16.7	5.64	6483	51560.6	605.51	0	23.871		8.72941e+07	1.6154e+08	2.275e+08	2.16067e+08	2.18676e+08	2.79808e+08	2.65441e+08	1.67634e+08	2.56486e+08	8.72941e+07	1.48303e+08	1.53526e+08	1.17952e+08	9.00834e+07	1.19197e+08	1.50736e+08	9.14334e+07	1.1895e+08	3	3	3	3	3	3	3	3	3	High	High	High	High	High	High	High
AN5122-T-p1	transcript=AN5122-T | gene=AN5122 | organism=Aspergillus_nidulans_FGSC_A4 | gene_product=Putative kinase with a predicted role in nucleotide salvage pathways | transcript_product=Putative kinase with a predicted role in nucleotide salvage pathways | location=ChrV_A_nidulans_FGSC_A4:1219406-1220348(+) | protein_length=259 | sequence_SO=chromosome | SO=protein_coding | is_pseudo=false	52	777	15	15	0	259	28.6	8.57	4978	57919.7	461.77	0	62.516		1.6631e+08	1.7793e+08	2.58952e+08	4.70919e+08	5.32583e+08	5.17474e+08	4.15884e+08	4.1356e+08	4.74201e+08	1.6631e+08	1.6335e+08	1.74751e+08	2.57076e+08	2.19397e+08	2.20441e+08	2.36168e+08	2.2557e+08	2.1992e+08	14	15	16	14	14	16	14	14	12	High	High	High	High	High	High	High
AN10195-T-p1	transcript=AN10195-T | gene=AN10195 | organism=Aspergillus_nidulans_FGSC_A4 | gene_product=Ortholog(s) have valine-tRNA ligase activity | transcript_product=Ortholog(s) have valine-tRNA ligase activity | location=ChrVII_A_nidulans_FGSC_A4:928686-932041(-) | protein_length=1033 | sequence_SO=chromosome | SO=protein_coding | is_pseudo=false	26	775	23	23	0	1033	116.9	7.11	3585	52129.2	458	0	112.897		4.11206e+07	8.67351e+07	7.71134e+07	8.93653e+07	1.08974e+08	1.105e+08	8.42861e+07	1.56499e+08	9.24463e+07	4.11206e+07	7.96277e+07	5.20391e+07	4.87848e+07	4.48919e+07	4.70723e+07	4.78635e+07	8.536e+07	4.28738e+07	19	17	16	14	13	12	17	17	18	High	High	High	High	High	High	High
AN1394-T-p1	transcript=AN1394-T | gene=AN1394 | organism=Aspergillus_nidulans_FGSC_A4 | gene_product=Putative septin | transcript_product=Putative septin | location=ChrVIII_A_nidulans_FGSC_A4:651905-653219(-) | protein_length=342 | sequence_SO=chromosome | SO=protein_coding | is_pseudo=false	48	767	13	13	0	342	38.7	8.09	7438	59807.4	573.78	0	112.951		3.29452e+08	3.33783e+08	3.42176e+08	3.11923e+08	3.19721e+08	3.14664e+08	3.46194e+08	3.15778e+08	3.0008e+08	3.29452e+08	3.06432e+08	2.30913e+08	1.70279e+08	1.31709e+08	1.34045e+08	1.96593e+08	1.72236e+08	1.39168e+08	10	10	11	12	11	10	9	10	9	High	High	High	High	High	High	High
AN10681-T-p1	transcript=AN10681-T | gene=AN10681 | organism=Aspergillus_nidulans_FGSC_A4 | gene_product=Ortholog(s) have structural constituent of ribosome activity, role in cytoplasmic translation, regulation of translational fidelity and cytosolic large ribosomal subunit localization | transcript_product=Ortholog(s) have structural constituent of ribosome activity, role in cytoplasmic translation, regulatio…	51	754	10	10	0	122	13.9	10.35	3118	44105.5	360.45	0	42.551		9.68978e+08	4.74055e+08	8.38852e+08	1.30301e+09	1.06508e+09	1.25735e+09	1.39993e+09	1.18226e+09	4.88075e+08	9.68978e+08	4.35209e+08	5.6609e+08	7.11319e+08	4.38761e+08	5.35623e+08	7.9498e+08	6.44848e+08	2.26354e+08	9	8	9	10	10	10	10	11	6	High	High	High	High	High	High	High
AN1689-T-p1	transcript=AN1689-T | gene=AN1689 | organism=Aspergillus_nidulans_FGSC_A4 | gene_product=putative oxidoreductase | transcript_product=putative oxidoreductase | location=ChrVII_A_nidulans_FGSC_A4:1624023-1625733(-) | protein_length=535 | sequence_SO=chromosome | SO=protein_coding | is_pseudo=false	33	752	16	16	0	535	58.4	6.57	5389	54280.3	520.9	0	91.011		2.81967e+08	2.1523e+08	2.68922e+08	3.54717e+08	3.73939e+08	3.23167e+08	2.6954e+08	3.25851e+08	3.37178e+08	2.81967e+08	1.97593e+08	1.81479e+08	1.93641e+08	1.54044e+08	1.37668e+08	1.53064e+08	1.77731e+08	1.56373e+08	14	14	11	14	15	12	13	12	13	High	High	High	High	High	High	High
AN3163-T-p1	transcript=AN3163-T | gene=AN3163 | organism=Aspergillus_nidulans_FGSC_A4 | gene_product=Putative stomatin ortholog, predicted to have scaffolding functions in maintenance of lipid microdomains in membranes | transcript_product=Putative stomatin ortholog, predicted to have scaffolding functions in maintenance of lipid microdomains in membranes | location=ChrVI_A_nidulans_FGSC_A4:1612656-1613864(-…	21	749	8	8	0	344	37.3	6.05	3330	42692.4	396.81	0	27.121		3.69176e+08	6.4307e+08	4.09268e+08	3.80939e+08	3.68648e+08	3.313e+08	4.15264e+08	3.48407e+08	2.56656e+08	3.69176e+08	5.90375e+08	2.7619e+08	2.07956e+08	1.51865e+08	1.41132e+08	2.35816e+08	1.90034e+08	1.19029e+08	6	6	6	7	6	7	7	6	6	High	High	High	High	High	High	High
AN1003-T-p1	transcript=AN1003-T | gene=AN1003 | organism=Aspergillus_nidulans_FGSC_A4 | gene_product=Putative isocitrate dehydrogenase (NAD+) with a predicted role in the TCA cycle | transcript_product=Putative isocitrate dehydrogenase (NAD+) with a predicted role in the TCA cycle | location=ChrVIII_A_nidulans_FGSC_A4:1831081-1832623(-) | protein_length=385 | sequence_SO=chromosome | SO=protein_coding | is_p…	33	746	11	11	0	385	41.8	8.37	7916	57481.8	646.04	0	54.306		3.16425e+08	4.41513e+08	5.00566e+08	2.78323e+08	3.08923e+08	2.91085e+08	2.56215e+08	2.23342e+08	5.49311e+08	3.16425e+08	4.05334e+08	3.37801e+08	1.51937e+08	127260910	1.24001e+08	1.45497e+08	1.21818e+08	2.54753e+08	10	10	8	10	9	10	10	10	10	High	High	High	High	High	High	High
AN3598-T-p1	transcript=AN3598-T | gene=AN3598 | organism=Aspergillus_nidulans_FGSC_A4 | gene_product=Putative peptidyl-prolyl cis-trans isomerase | transcript_product=Putative peptidyl-prolyl cis-trans isomerase | location=ChrII_A_nidulans_FGSC_A4:3653822-3654384(+) | protein_length=108 | sequence_SO=chromosome | SO=protein_coding | is_pseudo=false	37	745	3	3	0	108	11.6	7.18	8158	70921.8	774.73	0	33.818		3.35413e+07	8.18876e+07	9.27751e+07	8.59832e+07	8.21367e+07	7.66112e+07	7.09416e+07	9.90145e+07	9.1609e+07	3.35413e+07	7.51774e+07	6.26082e+07	4.69385e+07	3.38362e+07	3.2636e+07	4.02856e+07	5.4006e+07	4.24854e+07	3	3	2	3	3	2	3	3	3	High	High	High	High	High	High	High
AN1993-T-p1	transcript=AN1993-T | gene=AN1993 | organism=Aspergillus_nidulans_FGSC_A4 | gene_product=Putative aspartate transaminase with a predicted role in alanine, aspartate, and aromatic amino acid metabolism | transcript_product=Putative aspartate transaminase with a predicted role in alanine, aspartate, and aromatic amino acid metabolism | location=ChrVII_A_nidulans_FGSC_A4:2489202-2490835(+) | protein…	41	743	15	15	0	429	46.9	8.88	6679	58348	551.3	0	74.856		4.01529e+08	3.9524e+08	4.37308e+08	4.60479e+08	4.87138e+08	4.51502e+08	5.31341e+08	4.32064e+08	4.42357e+08	4.01529e+08	3.62852e+08	2.95112e+08	2.51377e+08	2.00676e+08	1.92338e+08	3.01733e+08	2.35663e+08	2.05151e+08	13	11	11	13	13	12	12	11	13	High	High	High	High	High	High	High
AN3591-T-p1	transcript=AN3591-T | gene=AN3591 | organism=Aspergillus_nidulans_FGSC_A4 | gene_product=Protein with similarity to bacterial propionyl-CoA-yielding methylmalonate semialdehyde dehydrogenase | transcript_product=Protein with similarity to bacterial propionyl-CoA-yielding methylmalonate semialdehyde dehydrogenase | location=ChrII_A_nidulans_FGSC_A4:3670581-3672420(+) | protein_length=568 | sequenc…	39	730	18	18	0	568	60.4	8.37	6047	58525.7	673.32	0	135.008		1.26766e+08	1.98733e+08	1.77396e+08	1.97614e+08	2.10186e+08	1.76231e+08	2.37523e+08	1.4536e+08	1.21582e+08	1.26766e+08	1.82448e+08	1.19714e+08	1.07878e+08	8.6586e+07	7.50735e+07	1.34882e+08	7.92844e+07	5.63861e+07	14	14	13	15	14	15	16	11	14	High	High	High	High	High	High	High
AN0906-T-p1	transcript=AN0906-T | gene=AN0906 | organism=Aspergillus_nidulans_FGSC_A4 | gene_product=Essential nuclear transport protein | transcript_product=Essential nuclear transport protein | location=ChrVIII_A_nidulans_FGSC_A4:2106916-2109968(-) | protein_length=872 | sequence_SO=chromosome | SO=protein_coding | is_pseudo=false	32	729	25	25	0	872	96.1	4.73	3914	47792.5	426.16	0	130.402		2.81184e+08	3.28183e+08	2.97528e+08	2.88497e+08	3.08796e+08	2.89657e+08	3.46386e+08	2.88135e+08	3.34219e+08	2.81184e+08	3.01291e+08	2.00783e+08	1.57491e+08	1.27209e+08	1.23392e+08	1.96702e+08	1.57159e+08	1.55001e+08	21	21	19	22	19	20	19	20	22	High	High	High	High	High	High	High
AN4775-T-p1	transcript=AN4775-T | gene=AN4775 | organism=Aspergillus_nidulans_FGSC_A4 | gene_product=Ortholog(s) have role in cullin deneddylation, positive regulation of mitotic metaphase/anaphase transition, proteasome-mediated ubiquitin-dependent protein catabolic process | transcript_product=Ortholog(s) have role in cullin deneddylation, positive regulation of mitotic metaphase/anaphase transition, prote…	34	726	16	16	0	487	56.4	7.17	6211	57275.4	577.34	0	98.738		1.12441e+08	8.71042e+07	5.72308e+07	1.1551e+08	1.07619e+08	1.11674e+08	1.50052e+08	1.20977e+08	1.25727e+08	1.12441e+08	7.99666e+07	3.86215e+07	6.30573e+07	4.43335e+07	4.75725e+07	8.52099e+07	6.59851e+07	5.83085e+07	13	13	12	14	14	14	16	13	13	High	High	High	High	High	High	High
AN6900-T-p1	transcript=AN6900-T | gene=AN6900 | organism=Aspergillus_nidulans_FGSC_A4 | gene_product=Putative triose-phosphate isomerase with a predicted role in gluconeogenesis and glycolysis | transcript_product=Putative triose-phosphate isomerase with a predicted role in gluconeogenesis and glycolysis | location=ChrI_A_nidulans_FGSC_A4:3517593-3518737(+) | protein_length=249 | sequence_SO=chromosome | SO=…	61	725	12	12	0	249	27.1	6.13	6617	49540.2	492.6	0	80.591		6.90467e+08	7.24977e+08	8.33568e+08	5.9138e+08	6.60357e+08	5.91875e+08	6.5637e+08	6.87861e+08	5.32517e+08	6.90467e+08	6.6557e+08	5.62524e+08	3.22836e+08	2.72034e+08	2.52136e+08	3.72732e+08	3.75184e+08	2.46965e+08	10	9	12	11	12	9	10	11	10	High	High	High	High	High	High	High
AN2743-T-p1	transcript=AN2743-T | gene=AN2743 | organism=Aspergillus_nidulans_FGSC_A4 | gene_product=Ortholog(s) have role in regulation of translation in response to nitrogen starvation | transcript_product=Ortholog(s) have role in regulation of translation in response to nitrogen starvation | location=ChrVI_A_nidulans_FGSC_A4:2944032-2947332(-) | protein_length=1035 | sequence_SO=chromosome | SO=protein_co…	30	718	30	29	1	1035	118.3	9.39	5285	50550.3	457.09	0	169.302		2.05374e+08	2.06309e+08	2.27207e+08	3.34435e+08	2.95312e+08	3.32882e+08	3.74987e+08	2.50114e+08	4.601e+08	2.05374e+08	1.89404e+08	1.53328e+08	1.82569e+08	1.21654e+08	1.41806e+08	2.12944e+08	1.36421e+08	2.1338e+08	26	25	23	32	29	25	29	26	24	High	High	High	High	High	High	High
AN11125-T-p1	transcript=AN11125-T | gene=AN11125 | organism=Aspergillus_nidulans_FGSC_A4 | gene_product=Ortholog(s) have glycine-tRNA ligase activity, role in DNA-templated transcription, termination, mitochondrial glycyl-tRNA aminoacylation and cytosol, mitochondrion localization | transcript_product=Ortholog(s) have glycine-tRNA ligase activity, role in DNA-templated transcription, termination, mitochondria…	32	715	19	19	0	689	78.1	6.87	5231	53992.2	566.08	0	115.067		5.10413e+07	8.26851e+07	2.07043e+08	1.97841e+08	2.07473e+08	2.15549e+08	2.44912e+08	2.06148e+08	3.75716e+08	5.10413e+07	7.59096e+07	1.3972e+08	1.08002e+08	8.54683e+07	9.18228e+07	1.39078e+08	1.1244e+08	1.74246e+08	13	16	15	19	18	18	17	17	18	High	High	High	High	High	High	High
AN10563-T-p1	transcript=AN10563-T | gene=AN10563 | organism=Aspergillus_nidulans_FGSC_A4 | gene_product=Putative vacuolar alkaline phosphatase with a predicted role in the autophagy pathway | transcript_product=Putative vacuolar alkaline phosphatase with a predicted role in the autophagy pathway | location=ChrIII_A_nidulans_FGSC_A4:1800922-1802810(+) | protein_length=606 | sequence_SO=chromosome | SO=protein_…	33	713	16	16	0	606	66.2	5.27	6475	59045.5	600.47	0	112.101		2.3782e+08	2.15492e+08	1.2076e+08	1.9907e+08	2.00803e+08	2.3214e+08	1.79715e+08	1.23497e+08	1.23143e+08	2.3782e+08	1.97834e+08	8.14937e+07	1.08673e+08	8.27207e+07	9.88906e+07	1.02055e+08	6.73597e+07	5.71098e+07	15	14	13	14	13	12	11	11	10	High	High	High	High	High	High	High
AN1917-T-p1	transcript=AN1917-T | gene=AN1917 | organism=Aspergillus_nidulans_FGSC_A4 | gene_product=Putative mitochondrial dicarboxylate-tricarboxylate carrier | transcript_product=Putative mitochondrial dicarboxylate-tricarboxylate carrier | location=ChrVII_A_nidulans_FGSC_A4:2249417-2250434(-) | protein_length=314 | sequence_SO=chromosome | SO=protein_coding | is_pseudo=false	39	713	10	10	0	314	33.9	10.21	7323	66039.8	641.17	0	109.578		4.56231e+08	2.55975e+08	2.97684e+08	2.21731e+08	2.60324e+08	2.76236e+08	2.60296e+08	2.03638e+08	2.38332e+08	4.56231e+08	2.35e+08	2.00889e+08	1.21044e+08	1.07241e+08	1.17675e+08	1.47814e+08	1.11071e+08	1.10531e+08	11	8	7	11	11	10	8	10	9	High	High	High	High	High	High	High
AN8707-T-p1	transcript=AN8707-T | gene=AN8707 | organism=Aspergillus_nidulans_FGSC_A4 | gene_product=Putative fumarate dehydratase with a predicted role in the TCA cycle | transcript_product=Putative fumarate dehydratase with a predicted role in the TCA cycle | location=ChrIII_A_nidulans_FGSC_A4:3059324-3061249(+) | protein_length=544 | sequence_SO=chromosome | SO=protein_coding | is_pseudo=false	32	712	15	15	0	544	58.5	8.94	3735	39296.6	238.63	0	67.562		7.71796e+07	7.60588e+07	6.69181e+07	1.69763e+08	1.66132e+08	5.93244e+08	1.2752e+08	8.07675e+07	4.17647e+08	7.71796e+07	6.98263e+07	4.51589e+07	9.2674e+07	6.84381e+07	2.52719e+08	7.24147e+07	4.40534e+07	1.93692e+08	11	10	12	13	13	11	12	14	10	High	High	High	High	High	High	High
AN2867-T-p1	transcript=AN2867-T | gene=AN2867 | organism=Aspergillus_nidulans_FGSC_A4 | gene_product=Putative phosphoglucomutase with a predicted role in carbohydrate metabolism | transcript_product=Putative phosphoglucomutase with a predicted role in carbohydrate metabolism | location=ChrVI_A_nidulans_FGSC_A4:2562837-2564609(+) | protein_length=556 | sequence_SO=chromosome | SO=protein_coding | is_pseudo=fa…	30	708	17	17	0	556	60.6	6.11	6405	51340.3	418.81	0	88.675		5.20066e+08	6.08301e+08	6.4659e+08	5.1233e+08	6.14649e+08	5.52483e+08	7.24709e+08	5.39732e+08	4.68907e+08	5.20066e+08	5.58455e+08	4.36344e+08	2.79682e+08	2.53204e+08	2.35355e+08	4.11541e+08	2.94389e+08	2.17465e+08	16	15	15	13	18	17	17	16	13	High	High	High	High	High	High	High
AN2062-T-p1	transcript=AN2062-T | gene=AN2062 | organism=Aspergillus_nidulans_FGSC_A4 | gene_product=Putative ER-resident chaperone of the HSP70 family | transcript_product=Putative ER-resident chaperone of the HSP70 family | location=ChrVII_A_nidulans_FGSC_A4:2727964-2730139(-) | protein_length=674 | sequence_SO=chromosome | SO=protein_coding | is_pseudo=false	19	701	14	13	0	674	73.7	4.97	4258	49482.9	497.1	0	86.118		7.88519e+07	7.40981e+07	1.17949e+08	1.65801e+08	2.01204e+08	2.42674e+08	1.35184e+08	3.36255e+08	4.17286e+08	7.88519e+07	6.80262e+07	7.95965e+07	9.0511e+07	8.28861e+07	1.03378e+08	7.67669e+07	1.83405e+08	1.93524e+08	13	12	14	12	13	14	13	12	12	High	High	High	High	High	High	High
AN1409-T-p1	transcript=AN1409-T | gene=AN1409 | organism=Aspergillus_nidulans_FGSC_A4 | gene_product=Putative acetyl-CoA C-acetyltransferase with a predicted role in fatty acid metabolism | transcript_product=Putative acetyl-CoA C-acetyltransferase with a predicted role in fatty acid metabolism | location=ChrVII_A_nidulans_FGSC_A4:696308-697730(+) | protein_length=399 | sequence_SO=chromosome | SO=protein_co…	27	694	8	8	0	399	41	7.06	5222	51822.2	494.58	0	58.26		1.08807e+08	8.84453e+07	6.29364e+07	1.09621e+08	1.80307e+08	1.5076e+08	1.03143e+08	1.06164e+08	7.85308e+07	1.08807e+08	8.11978e+07	4.24719e+07	5.98425e+07	7.42776e+07	6.4223e+07	5.85717e+07	5.79054e+07	3.64201e+07	6	6	5	6	7	8	6	5	6	High	High	High	High	High	High	High
AN2904-T-p1	transcript=AN2904-T | gene=AN2904 | organism=Aspergillus_nidulans_FGSC_A4 | gene_product=Putative 26S proteasome regulatory subunit | transcript_product=Putative 26S proteasome regulatory subunit | location=ChrVI_A_nidulans_FGSC_A4:2444358-2445904(+) | protein_length=422 | sequence_SO=chromosome | SO=protein_coding | is_pseudo=false	34	693	12	11	0	422	47.1	5.36	3633	46676.2	526.36	0	83.692		7.61542e+07	6.36029e+07	6.31343e+07	1.12562e+08	1.37698e+08	1.17921e+08	1.73676e+08	8.50161e+07	8.82665e+07	7.61542e+07	5.8391e+07	4.26055e+07	6.14479e+07	5.67247e+07	5.02338e+07	9.86254e+07	4.63708e+07	4.09353e+07	10	10	9	10	10	9	10	9	9	High	High	High	High	High	High	High
AN7354-T-p1	transcript=AN7354-T | gene=AN7354 | organism=Aspergillus_nidulans_FGSC_A4 | gene_product=Ortholog(s) have structural constituent of ribosome activity, role in translation and cytosolic large ribosomal subunit, nucleus localization | transcript_product=Ortholog(s) have structural constituent of ribosome activity, role in translation and cytosolic large ribosomal subunit, nucleus localization | loc…	47	692	7	7	0	131	15	11.4	4585	41601.7	375.69	0	59.05		6.25337e+08	1.58542e+08	2.13875e+08	2.15381e+08	1.10851e+08	8.2191e+07	1.6589e+08	1.42716e+08	2.43252e+08	6.25337e+08	1.45551e+08	1.44331e+08	1.17577e+08	4.56652e+07	3.5013e+07	9.42039e+07	7.78425e+07	1.12813e+08	9	7	8	8	8	8	9	9	8	High	High	High	High	High	High	High
AN0858-T-p1	transcript=AN0858-T | gene=AN0858 | organism=Aspergillus_nidulans_FGSC_A4 | gene_product=Putative chaperone | transcript_product=Putative chaperone | location=ChrVIII_A_nidulans_FGSC_A4:2252822-2255605(+) | protein_length=927 | sequence_SO=chromosome | SO=protein_coding | is_pseudo=false	26	689	21	20	1	927	103.5	5.74	4385	48072	527.08	0	114.866		3.28095e+08	1.08236e+08	1.30008e+08	1.59923e+08	1.97677e+08	1.87795e+08	1.91227e+08	2.83541e+08	1.56188e+08	3.28095e+08	9.93672e+07	8.77341e+07	8.73022e+07	8.14331e+07	7.99995e+07	1.08592e+08	1.54653e+08	7.24351e+07	19	18	15	17	17	18	19	19	15	High	High	High	High	High	High	High
AN3592-T-p1	transcript=AN3592-T | gene=AN3592 | organism=Aspergillus_nidulans_FGSC_A4 | gene_product=Putative calnexin with a predicted role in protein folding and protein quality control on the endoplasmic reticulum (ER) membrane | transcript_product=Putative calnexin with a predicted role in protein folding and protein quality control on the endoplasmic reticulum (ER) membrane | location=ChrII_A_nidulans_F…	25	689	14	14	0	561	61.6	4.93	3726	41590.4	427.04	0	101.831		4.95192e+08	4.37751e+08	5.0953e+08	5.14737e+08	3.37499e+08	3.04604e+08	3.47999e+08	2.58767e+08	2.76359e+08	4.95192e+08	4.01881e+08	3.43851e+08	2.80996e+08	1.39033e+08	1.2976e+08	1.97618e+08	1.41141e+08	1.28167e+08	12	11	9	14	14	13	12	13	10	High	High	High	High	High	High	High
AN0648-T-p1	transcript=AN0648-T | gene=AN0648 | organism=Aspergillus_nidulans_FGSC_A4 | gene_product=Trifunctional protein involved in tryptophan biosynthesis | transcript_product=Trifunctional protein involved in tryptophan biosynthesis | location=ChrVIII_A_nidulans_FGSC_A4:2900979-2902973(+) | protein_length=664 | sequence_SO=chromosome | SO=protein_coding | is_pseudo=false	28	686	14	14	0	664	71.8	6.67	4047	52867.8	456.33	0	88.312		2.49003e+07	6.5977e+07	6.06814e+07	3.05162e+07	7.23631e+07	5.10575e+07	6.82668e+07	5.90638e+07	9.18496e+07	2.49003e+07	6.05706e+07	4.09502e+07	1.66589e+07	2.981e+07	2.17502e+07	3.87667e+07	3.22155e+07	4.2597e+07	11	9	10	13	12	11	10	9	9	High	High	High	High	High	High	High
AN8219-T-p1	transcript=AN8219-T | gene=AN8219 | organism=Aspergillus_nidulans_FGSC_A4 | gene_product=Putative plasma membrane ATPase with a predicted role in energy metabolism | transcript_product=Putative plasma membrane ATPase with a predicted role in energy metabolism | location=ChrII_A_nidulans_FGSC_A4:1183186-1186594(-) | protein_length=1088 | sequence_SO=chromosome | SO=protein_coding | is_pseudo=false	8	686	6	1	0	1088	118.8	6.16	2854	39125.8	376.75	0	43.261		310654	546763		448847	821692	813238	1.03076e+06			310654	501959		245027	338496	346435	585338			1	1		1	1	1	1			Peak Found	Peak Found	Not Found	Peak Found	Peak Found	Peak Found	High
AN10060-T-p1	transcript=AN10060-T | gene=AN10060 | organism=Aspergillus_nidulans_FGSC_A4 | gene_product=Putative alpha-amylase | transcript_product=Putative alpha-amylase | location=ChrVIII_A_nidulans_FGSC_A4:3822800-3827536(-) | protein_length=1537 | sequence_SO=chromosome | SO=protein_coding | is_pseudo=false	19	683	27	27	0	1537	173.2	5.69	5287	46987	449.12	0	146.13		2.07432e+08	3.65805e+08	2.75869e+08	3.43009e+08	2.32041e+08	1.62021e+08	2.35038e+08	1.90963e+08	2.22691e+08	2.07432e+08	3.35829e+08	1.86167e+08	1.87249e+08	9.55892e+07	6.90199e+07	1.33471e+08	1.04158e+08	1.03277e+08	24	20	22	22	21	22	19	18	20	High	High	High	High	High	High	High
AN5482-T-p1	transcript=AN5482-T | gene=AN5482 | organism=Aspergillus_nidulans_FGSC_A4 | gene_product=Putative Ran GTPase, GTP binding protein | transcript_product=Putative Ran GTPase, GTP binding protein | location=ChrV_A_nidulans_FGSC_A4:2668207-2669233(-) | protein_length=215 | sequence_SO=chromosome | SO=protein_coding | is_pseudo=false	43	683	11	11	0	215	24.2	7.39	3142	43355.4	354.61	0	59.294	Acetyl [N-Term]	7.3683e+08	3.83886e+08	3.73071e+08	4.57533e+08	4.54514e+08	3.32513e+08	3.71394e+08	2.58417e+08	3.6544e+08	7.3683e+08	3.52429e+08	2.51762e+08	2.49768e+08	1.87237e+08	1.41649e+08	2.10903e+08	1.4095e+08	1.6948e+08	8	7	9	9	9	10	9	11	7	High	High	High	High	High	High	High
AN5662-T-p1	transcript=AN5662-T | gene=AN5662 | organism=Aspergillus_nidulans_FGSC_A4 | gene_product=Ortholog(s) have cytosol localization | transcript_product=Ortholog(s) have cytosol localization | location=ChrV_A_nidulans_FGSC_A4:2047075-2049456(-) | protein_length=722 | sequence_SO=chromosome | SO=protein_coding | is_pseudo=false	19	679	15	15	0	722	82.9	7.17	5792	46920	396.84	0	89.087		1.05142e+08	1.73874e+08	1.49225e+08	1.60464e+08	1.05691e+08	1.18781e+08	1.4627e+08	1.18151e+08	1.08023e+08	1.05142e+08	1.59626e+08	1.00702e+08	8.75976e+07	4.35395e+07	5.06e+07	8.30625e+07	6.44436e+07	5.00976e+07	13	13	11	13	14	13	11	14	13	High	High	High	High	High	High	High
AN3223-T-p1	transcript=AN3223-T | gene=AN3223 | organism=Aspergillus_nidulans_FGSC_A4 | gene_product=6-phosphofructokinase, putative | transcript_product=6-phosphofructokinase, putative | location=ChrVI_A_nidulans_FGSC_A4:1415541-1418027(+) | protein_length=795 | sequence_SO=chromosome | SO=protein_coding | is_pseudo=false	30	677	19	19	0	795	87.2	7.37	6279	51724.2	510.35	0	118.339		1.87111e+08	1.96144e+08	2.16052e+08	2.24431e+08	1.69399e+08	1.48748e+08	1.66432e+08	9.54735e+07	8.99779e+07	1.87111e+08	1.80071e+08	1.458e+08	1.22518e+08	6.9784e+07	6.33659e+07	9.45119e+07	5.20746e+07	4.1729e+07	17	15	15	16	17	15	14	12	14	High	High	High	High	High	High	High
AN10220-T-p1	transcript=AN10220-T | gene=AN10220 | organism=Aspergillus_nidulans_FGSC_A4 | gene_product=Putatice cytochrome c peroxidase | transcript_product=Putatice cytochrome c peroxidase | location=ChrVII_A_nidulans_FGSC_A4:1416046-1417189(+) | protein_length=361 | sequence_SO=chromosome | SO=protein_coding | is_pseudo=false	40	677	13	13	0	361	39.9	8.79	6797	50314.8	490.22	0	87.121		2.2485e+08	2.29905e+08	1.86898e+08	2.64144e+08	2.71695e+08	2.32244e+08	2.10678e+08	1.94826e+08	1.74864e+08	2.2485e+08	2.11066e+08	1.26126e+08	1.44197e+08	1.11925e+08	9.89348e+07	1.19638e+08	1.06265e+08	8.10967e+07	11	11	10	12	12	12	11	9	11	High	High	High	High	High	High	High
AN4779-T-p1	transcript=AN4779-T | gene=AN4779 | organism=Aspergillus_nidulans_FGSC_A4 | gene_product=Ortholog of A. fumigatus Af293 : Afu3g06660, A. niger CBS 513.88 : An11g09650, A. oryzae RIB40 : AO090020000332, Aspergillus wentii : Aspwe1_0173599 and Aspergillus sydowii : Aspsy1_0087834 | transcript_product=Ortholog of A. fumigatus Af293 : Afu3g06660, A. niger CBS 513.88 : An11g09650, A. oryzae RIB40 : AO…	30	676	10	10	0	388	44.3	9.1	4508	46237.8	438.55	0	60.568		8.49408e+07	7.06035e+07	8.95495e+07	7.04181e+07	4.89104e+07	5.68988e+07	8.74015e+07	1.15645e+08	1.32375e+08	8.49408e+07	6.4818e+07	6.04314e+07	3.84414e+07	2.01486e+07	2.42386e+07	4.96327e+07	6.30769e+07	6.13915e+07	9	9	9	9	10	8	9	9	9	High	High	High	High	High	High	High
AN1162-T-p1	transcript=AN1162-T | gene=AN1162 | organism=Aspergillus_nidulans_FGSC_A4 | gene_product=Ortholog(s) have guanyl-nucleotide exchange factor activity, translation elongation factor activity | transcript_product=Ortholog(s) have guanyl-nucleotide exchange factor activity, translation elongation factor activity | location=ChrVIII_A_nidulans_FGSC_A4:1336849-1337929(+) | protein_length=237 | sequence_…	46	670	8	8	0	237	26	4.55	6512	68778.6	567.16	0	75.455		8.71403e+07	4.34197e+07	5.79969e+07	1.25077e+08	1.23538e+08	1.31067e+08	9.61914e+07	9.9256e+07	1.2342e+08	8.71403e+07	3.98618e+07	3.91385e+07	6.828e+07	5.08913e+07	5.58338e+07	5.46242e+07	5.41377e+07	5.72384e+07	6	6	6	6	5	6	6	6	6	High	High	High	High	High	High	High
AN4688-T-p1	transcript=AN4688-T | gene=AN4688 | organism=Aspergillus_nidulans_FGSC_A4 | gene_product=Putative acyl-CoA dehydrogenase | transcript_product=Putative acyl-CoA dehydrogenase | location=ChrIII_A_nidulans_FGSC_A4:1313102-1314691(-) | protein_length=431 | sequence_SO=chromosome | SO=protein_coding | is_pseudo=false	31	665	14	14	0	431	46.8	7.77	5685	46870.5	514.48	0	78.714		1.27773e+08	8.1199e+07	8.41325e+07	8.29504e+07	1.22073e+08	1.09717e+08	1.14693e+08	7.78906e+07	8.8827e+07	1.27773e+08	7.45453e+07	5.67758e+07	4.52829e+07	5.0288e+07	4.67389e+07	6.51304e+07	4.24843e+07	4.11952e+07	12	12	12	11	13	12	11	9	12	High	High	High	High	High	High	High
AN7111-T-p1	transcript=AN7111-T | gene=AN7111 | organism=Aspergillus_nidulans_FGSC_A4 | gene_product=Peroxisomal multifunctional enzyme involved in fatty acid beta-oxidation | transcript_product=Peroxisomal multifunctional enzyme involved in fatty acid beta-oxidation | location=ChrIV_A_nidulans_FGSC_A4:987069-990079(-) | protein_length=903 | sequence_SO=chromosome | SO=protein_coding | is_pseudo=false	24	663	20	20	0	903	96.8	8.46	4710	44553.7	424	0	96.212		2.19734e+08	5.05414e+08	4.58499e+08	4.38753e+08	5.58252e+08	2.56075e+08	2.98239e+08	3.02416e+08	3.37823e+08	2.19734e+08	4.63999e+08	3.09412e+08	2.39517e+08	2.29972e+08	1.09087e+08	1.69361e+08	1.64948e+08	1.56672e+08	13	16	13	17	14	15	16	16	14	High	High	High	High	High	High	High
AN3112-T-p1	transcript=AN3112-T | gene=AN3112 | organism=Aspergillus_nidulans_FGSC_A4 | gene_product=UDP-galactopyranose mutase, a flavoenzyme that converts UDP-galactopyranose to UDP-galactofuranose, a central enzyme in in galactofuranose biosynthesis | transcript_product=UDP-galactopyranose mutase, a flavoenzyme that converts UDP-galactopyranose to UDP-galactofuranose, a central enzyme in in galactofuranos…	28	662	13	13	0	532	59.4	6.99	2860	41376.6	351.75	0	63.886		3.02216e+07	6.01187e+07	5.07011e+07	8.81019e+07	4.93174e+07	8.50725e+07	6.21382e+07	1.15068e+08	1.27451e+08	3.02216e+07	5.51924e+07	3.4215e+07	4.8095e+07	2.03163e+07	3.62405e+07	3.52864e+07	6.27619e+07	5.9108e+07	9	12	9	11	12	11	11	12	10	High	High	High	High	High	High	High
AN8704-T-p1	transcript=AN8704-T | gene=AN8704 | organism=Aspergillus_nidulans_FGSC_A4 | gene_product=60S ribosomal protein L24a | transcript_product=60S ribosomal protein L24a | location=ChrIII_A_nidulans_FGSC_A4:3064819-3065640(-) | protein_length=160 | sequence_SO=chromosome | SO=protein_coding | is_pseudo=false	35	660	8	8	0	160	17.9	11.22	4289	46213.8	451.63	0	33.777		1.61868e+08	2.65736e+08	2.86947e+08	3.24659e+08	3.43287e+08	2.80134e+08	3.59407e+08	4.18848e+08	3.81165e+08	1.61868e+08	2.43961e+08	1.93643e+08	1.77232e+08	1.41417e+08	1.19336e+08	2.04096e+08	2.28455e+08	1.76773e+08	5	7	7	6	7	7	6	7	5	High	High	High	High	High	High	High
AN5210-T-p1	transcript=AN5210-T | gene=AN5210 | organism=Aspergillus_nidulans_FGSC_A4 | gene_product=Putative pyruvate kinase with a predicted role in gluconeogenesis and glycolysis | transcript_product=Putative pyruvate kinase with a predicted role in gluconeogenesis and glycolysis | location=ChrV_A_nidulans_FGSC_A4:1493691-1495609(+) | protein_length=526 | sequence_SO=chromosome | SO=protein_coding | is_ps…	21	659	10	10	0	526	58.1	8.12	4955	48457.1	544.86	0	66.922		3.78091e+08	5.73629e+08	4.37652e+08	3.92198e+08	3.82408e+08	3.31818e+08	3.0845e+08	5.16353e+08	6.22519e+08	3.78091e+08	5.26624e+08	2.95344e+08	2.14102e+08	1.57533e+08	1.41353e+08	1.7516e+08	2.81637e+08	2.88705e+08	8	9	7	7	7	6	7	8	7	High	High	High	High	High	High	High
AN2316-T-p1	transcript=AN2316-T | gene=AN2316 | organism=Aspergillus_nidulans_FGSC_A4 | gene_product=Putative cytochrome c oxidase subunit with a predicted role in energy metabolism | transcript_product=Putative cytochrome c oxidase subunit with a predicted role in energy metabolism | location=ChrVII_A_nidulans_FGSC_A4:3535400-3536168(-) | protein_length=197 | sequence_SO=chromosome | SO=protein_coding | is_…	31	658	5	5	0	197	22.2	9.74	6968	49071.8	487.78	0	50.977		7.19797e+07	1.08021e+08	1.20144e+08	7.87791e+07	7.51021e+07	6.61006e+07	7.53045e+07	1.15279e+08	1.32423e+08	7.19797e+07	9.91698e+07	8.10776e+07	4.30057e+07	3.09383e+07	2.81585e+07	4.27632e+07	6.28771e+07	6.14138e+07	4	5	5	5	5	5	5	5	5	High	High	High	High	High	High	High
AN6988-T-p1	transcript=AN6988-T | gene=AN6988 | organism=Aspergillus_nidulans_FGSC_A4 | gene_product=Ortholog(s) have protein domain specific binding activity | transcript_product=Ortholog(s) have protein domain specific binding activity | location=ChrIV_A_nidulans_FGSC_A4:1383661-1384960(+) | protein_length=389 | sequence_SO=chromosome | SO=protein_coding | is_pseudo=false	42	657	15	14	0	389	43.4	8.18	1804	42274.6	436.73	0	79.188	Acetyl [N-Term]	6.43717e+07	1.27185e+08	1.402e+08	9.27062e+07	1.22127e+08	1.24999e+08	1.39262e+08	1.36092e+08	1.43499e+08	6.43717e+07	1.16763e+08	9.46126e+07	5.06085e+07	5.031e+07	5.32487e+07	7.90824e+07	7.42293e+07	6.65505e+07	11	11	12	13	13	11	12	10	11	High	High	High	High	High	High	High
AN5999-T-p1	transcript=AN5999-T | gene=AN5999 | organism=Aspergillus_nidulans_FGSC_A4 | gene_product=Carbamoyl-phosphate synthase, large subunit | transcript_product=Carbamoyl-phosphate synthase, large subunit | location=ChrI_A_nidulans_FGSC_A4:1550371-1554090(+) | protein_length=1173 | sequence_SO=chromosome | SO=protein_coding | is_pseudo=false	24	654	23	22	0	1173	128.8	6.1	2459	39496.5	371.99	0	112.844		8.5638e+07	8.79096e+07	1.24379e+08	1.48008e+08	1.11548e+08	1.07487e+08	9.50676e+07	1.40624e+08	1.57888e+08	8.5638e+07	8.0706e+07	8.39358e+07	8.07979e+07	4.59521e+07	4.57888e+07	5.3986e+07	7.67014e+07	7.32234e+07	17	18	18	21	14	16	17	16	17	High	High	High	High	High	High	High
AN2017-T-p1	transcript=AN2017-T | gene=AN2017 | organism=Aspergillus_nidulans_FGSC_A4 | gene_product=Putative alpha-glucosidase with a predicted role in maltose metabolism | transcript_product=Putative alpha-glucosidase with a predicted role in maltose metabolism | location=ChrVII_A_nidulans_FGSC_A4:2576599-2579713(+) | protein_length=992 | sequence_SO=chromosome | SO=protein_coding | is_pseudo=false	22	652	14	13	0	992	109.6	5.2	3639	42954.8	437.64	0	84.063		1.02123e+08	8.73965e+07	1.15045e+08	6.83832e+07	1.14889e+08	1.11744e+08	1.37746e+08	6.93405e+07	5.11693e+07	1.02123e+08	8.02349e+07	7.76366e+07	3.73306e+07	4.73287e+07	4.76023e+07	7.82215e+07	3.78207e+07	2.37308e+07	9	8	9	11	8	9	11	9	8	High	High	High	High	High	High	High
AN6689-T-p1	transcript=AN6689-T | gene=AN6689 | organism=Aspergillus_nidulans_FGSC_A4 | gene_product=Ortholog(s) have structural constituent of nuclear pore activity | transcript_product=Ortholog(s) have structural constituent of nuclear pore activity | location=ChrI_A_nidulans_FGSC_A4:2856873-2858014(+) | protein_length=280 | sequence_SO=chromosome | SO=protein_coding | is_pseudo=false	35	650	8	8	0	280	30.9	10.1	5125	55675.8	509.32	0	65.723		7.42045e+07	1.70426e+08	1.33943e+08	1.65566e+08	1.98678e+08	2.07024e+08	2.28112e+08	2.6372e+08	2.80379e+08	7.42045e+07	1.56461e+08	9.03899e+07	9.0383e+07	8.18455e+07	8.81911e+07	1.29538e+08	1.43842e+08	1.30031e+08	7	7	8	8	7	8	8	7	7	High	High	High	High	High	High	High
AN0705-T-p1	transcript=AN0705-T | gene=AN0705 | organism=Aspergillus_nidulans_FGSC_A4 | gene_product=Ortholog(s) have isoleucine-tRNA ligase activity, role in isoleucyl-tRNA aminoacylation and cytosol localization | transcript_product=Ortholog(s) have isoleucine-tRNA ligase activity, role in isoleucyl-tRNA aminoacylation and cytosol localization | location=ChrVIII_A_nidulans_FGSC_A4:2734870-2738165(+) | prot…	20	650	22	22	0	1077	123.7	6.51	3478	41313.1	320.9	0	115.997	Acetyl [N-Term]	1.73038e+08	6.61623e+07	9.49921e+07	9.63524e+07	1.31112e+08	1.10598e+08	1.90114e+08	1.90451e+08	1.68083e+08	1.73038e+08	6.07407e+07	6.41043e+07	5.2599e+07	5.40116e+07	4.71141e+07	1.0796e+08	1.03879e+08	7.79515e+07	19	17	17	17	17	14	16	15	17	High	High	High	High	High	High	High
AN5442-T-p1	transcript=AN5442-T | gene=AN5442 | organism=Aspergillus_nidulans_FGSC_A4 | gene_product=Putative carboxypeptidase Y | transcript_product=Putative carboxypeptidase Y | location=ChrV_A_nidulans_FGSC_A4:2803189-2804900(+) | protein_length=552 | sequence_SO=chromosome | SO=protein_coding | is_pseudo=false	16	649	7	7	0	552	62	5.05	5245	44535.1	419.5	0	65.327		1.82003e+08	2.84994e+08	3.17753e+08	2.90226e+08	4.45705e+08	3.00897e+08	4.01108e+08	2.25539e+08	1.50646e+08	1.82003e+08	2.6164e+08	2.14432e+08	1.58435e+08	1.83608e+08	1.28181e+08	2.27777e+08	1.23017e+08	6.98648e+07	9	10	10	10	9	10	9	11	9	High	High	High	High	High	High	High
AN9094-T-p1	transcript=AN9094-T | gene=AN9094 | organism=Aspergillus_nidulans_FGSC_A4 | gene_product=Putative UDP-N-acetylglucosamine pyrophosphorylase with a predicted role in chitin biosynthesis | transcript_product=Putative UDP-N-acetylglucosamine pyrophosphorylase with a predicted role in chitin biosynthesis | location=ChrVI_A_nidulans_FGSC_A4:451727-453367(+) | protein_length=505 | sequence_SO=chromosom…	30	649	15	15	0	505	55.8	6.43	3309	43303.6	433.93	0	82.834		1.35649e+08	1.24681e+08	1.51793e+08	2.05944e+08	1.62005e+08	1.72134e+08	1.50672e+08	1.77947e+08	1.80956e+08	1.35649e+08	1.14464e+08	1.02436e+08	1.12426e+08	6.67381e+07	7.33284e+07	8.55623e+07	9.70585e+07	8.39218e+07	9	9	11	13	9	11	12	12	10	High	High	High	High	High	High	High
AN1401-T-p1	transcript=AN1401-T | gene=AN1401 | organism=Aspergillus_nidulans_FGSC_A4 | gene_product=Essential exportin 1 involved in nuclear export | transcript_product=Essential exportin 1 involved in nuclear export | location=ChrVIII_A_nidulans_FGSC_A4:624465-628263(+) | protein_length=1072 | sequence_SO=chromosome | SO=protein_coding | is_pseudo=false	19	649	18	18	0	1072	123.3	5.55	4663	44156.2	355.04	0	91.379		1.83707e+08	1.84246e+08	1.33811e+08	1.36172e+08	1.44021e+08	1.3821e+08	1.69864e+08	1.28384e+08	8.12623e+07	1.83707e+08	1.69148e+08	9.03005e+07	7.43369e+07	5.93292e+07	5.88768e+07	9.64605e+07	7.0025e+07	37686973	10	12	11	12	12	14	12	10	13	High	High	High	High	High	High	High
AN2756-T-p1	transcript=AN2756-T | gene=AN2756 | organism=Aspergillus_nidulans_FGSC_A4 | gene_product=Predicted actin binding protein with similarity to Saccharomyces cerevisiae Sla2p | transcript_product=Predicted actin binding protein with similarity to Saccharomyces cerevisiae Sla2p | location=ChrVI_A_nidulans_FGSC_A4:2903571-2907134(+) | protein_length=1022 | sequence_SO=chromosome | SO=protein_coding | i…	31	649	27	27	0	1022	115.5	5.57	4724	52114.3	551.35	0	157.198		2.69574e+08	2.48682e+08	3.60086e+08	3.28366e+08	2.89793e+08	2.94648e+08	2.79876e+08	2.98322e+08	2.60557e+08	2.69574e+08	2.28304e+08	2.43e+08	1.79256e+08	1.1938e+08	1.25518e+08	1.58933e+08	1.62715e+08	1.20838e+08	24	21	21	22	19	23	23	19	21	High	High	High	High	High	High	High
AN9138-T-p1	transcript=AN9138-T | gene=AN9138 | organism=Aspergillus_nidulans_FGSC_A4 | gene_product=Putative amidase/acetamidase | transcript_product=Putative amidase/acetamidase | location=ChrVI_A_nidulans_FGSC_A4:330557-332464(-) | protein_length=579 | sequence_SO=chromosome | SO=protein_coding | is_pseudo=false	31	647	16	16	0	579	63.4	8.31	5126	43638.8	443.44	0	86.329		1.00562e+08	1.49476e+08	1.50302e+08	1.60655e+08	1.22035e+08	9.72659e+07	1.53942e+08	1.88643e+08	2.21269e+08	1.00562e+08	1.37227e+08	1.0143e+08	8.77018e+07	5.02724e+07	4.14348e+07	8.7419e+07	1.02892e+08	1.02618e+08	12	13	13	11	14	11	11	12	12	High	High	High	High	High	High	High
AN4659-T-p1	transcript=AN4659-T | gene=AN4659 | organism=Aspergillus_nidulans_FGSC_A4 | gene_product=Putative acyl-CoA synthetase/AMP-binding domain protein | transcript_product=Putative acyl-CoA synthetase/AMP-binding domain protein | location=ChrIII_A_nidulans_FGSC_A4:1380168-1382364(-) | protein_length=598 | sequence_SO=chromosome | SO=protein_coding | is_pseudo=false	24	637	14	14	0	598	65.2	8.19	4070	44182.2	455.03	0	64.889		2.25935e+08	1.88022e+08	2.03755e+08	2.05481e+08	2.39004e+08	2.20408e+08	1.67829e+08	9.01332e+07	1.63847e+08	2.25935e+08	1.72615e+08	1.37502e+08	1.12173e+08	9.84575e+07	9.38926e+07	9.53051e+07	4.91618e+07	7.59873e+07	13	12	13	12	11	12	13	9	11	High	High	High	High	High	High	High
AN3059-T-p1	transcript=AN3059-T | gene=AN3059 | organism=Aspergillus_nidulans_FGSC_A4 | gene_product=Putative phosphoglycerate mutase with a predicted role in gluconeogenesis and glycolysis | transcript_product=Putative phosphoglycerate mutase with a predicted role in gluconeogenesis and glycolysis | location=ChrVI_A_nidulans_FGSC_A4:1975091-1976782(-) | protein_length=520 | sequence_SO=chromosome | SO=prote…	20	635	9	9	0	520	57.2	5.53	7752	52034.1	450.81	0	58.032		1.4563e+08	1.33772e+08	1.20601e+08	1.41102e+08	1.3349e+08	1.36638e+08	1.24908e+08	1.63749e+08	1.89869e+08	1.4563e+08	1.22811e+08	8.1386e+07	7.70278e+07	5.49913e+07	5.82071e+07	7.09312e+07	8.93142e+07	8.80553e+07	9	8	6	9	8	8	8	7	9	High	High	High	High	High	High	High
AN1158-T-p1	transcript=AN1158-T | gene=AN1158 | organism=Aspergillus_nidulans_FGSC_A4 | gene_product=Ortholog(s) have mRNA 3'-UTR binding, mRNA 5'-UTR binding, translation repressor activity, nucleic acid binding activity | transcript_product=Ortholog(s) have mRNA 3'-UTR binding, mRNA 5'-UTR binding, translation repressor activity, nucleic acid binding activity | location=ChrVIII_A_nidulans_FGSC_A4:1344704-1…	17	630	21	21	0	1374	150.7	7.33	4277	48981.8	487.01	0	141.289		1.07182e+08	8.50087e+07	7.48768e+07	1.08346e+08	1.17897e+08	1.13988e+08	9.40982e+07	4.86185e+07	5.56087e+07	1.07182e+08	7.80428e+07	5.05297e+07	5.91465e+07	4.85678e+07	4.85582e+07	5.34355e+07	2.65182e+07	2.57896e+07	17	19	14	18	17	17	17	12	17	High	High	High	High	High	High	High
AN2068-T-p1	transcript=AN2068-T | gene=AN2068 | organism=Aspergillus_nidulans_FGSC_A4 | gene_product=Ortholog(s) have cytosol, endoplasmic reticulum, nuclear outer membrane-endoplasmic reticulum membrane network localization | transcript_product=Ortholog(s) have cytosol, endoplasmic reticulum, nuclear outer membrane-endoplasmic reticulum membrane network localization | location=ChrVII_A_nidulans_FGSC_A4:2753…	23	626	25	25	0	1305	141.4	6.99	4713	43296.6	442.84	0	145.983		1.47687e+08	4.99954e+08	6.18974e+08	1.67954e+08	3.35411e+08	5.28436e+08	5.48135e+08	1.77408e+08	1.38909e+08	1.47687e+08	4.58986e+08	4.17707e+08	9.16863e+07	1.38173e+08	2.25111e+08	3.11269e+08	9.67647e+07	6.44219e+07	20	18	21	20	20	18	18	21	18	High	High	High	High	High	High	High
AN8867-T-p1	transcript=AN8867-T | gene=AN8867 | organism=Aspergillus_nidulans_FGSC_A4 | gene_product=Ortholog(s) have cytosol localization | transcript_product=Ortholog(s) have cytosol localization | location=ChrIII_A_nidulans_FGSC_A4:2552063-2553830(+) | protein_length=474 | sequence_SO=chromosome | SO=protein_coding | is_pseudo=false	33	625	13	13	0	474	54	6.49	3096	43755.5	432.23	0	97.881		1.12283e+08	1.40452e+08	1.489e+08	9.13591e+07	7.92364e+07	7.09352e+07	1.35984e+08	7.80973e+07	7.88041e+07	1.12283e+08	1.28943e+08	1.00483e+08	4.98732e+07	3.26414e+07	3.0218e+07	7.72215e+07	4.2597e+07	3.65469e+07	11	11	9	12	12	10	9	11	10	High	High	High	High	High	High	High
AN2943-T-p1	transcript=AN2943-T | gene=AN2943 | organism=Aspergillus_nidulans_FGSC_A4 | gene_product=Putative regulator of secondary metabolism | transcript_product=Putative regulator of secondary metabolism | location=ChrVI_A_nidulans_FGSC_A4:2316979-2318388(-) | protein_length=448 | sequence_SO=chromosome | SO=protein_coding | is_pseudo=false	35	622	15	15	0	448	50.5	6.96	4748	42764.7	393.34	0	126.514		2.39619e+08	2.30926e+08	2.04697e+08	2.42609e+08	2.48672e+08	2.69306e+08	1.90286e+08	1.78073e+08	1.70069e+08	2.39619e+08	2.12003e+08	1.38137e+08	1.32441e+08	1.0244e+08	1.14723e+08	1.08058e+08	9.71273e+07	7.88726e+07	12	11	12	12	12	13	11	11	11	High	High	High	High	High	High	High
AN4282-T-p1	transcript=AN4282-T | gene=AN4282 | organism=Aspergillus_nidulans_FGSC_A4 | gene_product=Ortholog(s) have metalloaminopeptidase activity, role in peptide catabolic process and intracellular localization | transcript_product=Ortholog(s) have metalloaminopeptidase activity, role in peptide catabolic process and intracellular localization | location=ChrII_A_nidulans_FGSC_A4:1516340-1519876(+) | prot…	16	621	14	14	0	957	107.9	6.35	4472	38634.4	326.29	0	88.694		1.44232e+08	1.77895e+08	1.75487e+08	1.90545e+08	1.64599e+08	1.58509e+08	1.76826e+08	1.03646e+08	1.06863e+08	1.44232e+08	1.63317e+08	1.18425e+08	1.04019e+08	6.78065e+07	6.75241e+07	1.00414e+08	5.65321e+07	4.956e+07	12	10	9	11	10	11	12	10	9	High	High	High	High	High	High	High
AN0932-T-p1	transcript=AN0932-T | gene=AN0932 | organism=Aspergillus_nidulans_FGSC_A4 | gene_product=Putative glutathione oxidoreductase with a predicted role in glutathione biosynthesis | transcript_product=Putative glutathione oxidoreductase with a predicted role in glutathione biosynthesis | location=ChrVIII_A_nidulans_FGSC_A4:2028750-2030543(-) | protein_length=557 | sequence_SO=chromosome | SO=protein_c…	30	620	12	12	0	557	60.6	8.48	3217	43046.4	422.58	0	80.95		1.21756e+08	1.06785e+08	1.39545e+08	1.08688e+08	1.52075e+08	9.98023e+07	9.13602e+07	1.06493e+08	1.32869e+08	1.21756e+08	9.80347e+07	9.41704e+07	5.93328e+07	6.26471e+07	4.25153e+07	5.18807e+07	5.80848e+07	6.16206e+07	6	8	11	9	10	10	9	9	11	High	High	High	High	High	High	High
AN1918-T-p1	transcript=AN1918-T | gene=AN1918 | organism=Aspergillus_nidulans_FGSC_A4 | gene_product=Putative phosphoenolpyruvate carboxykinase with a predicted role in gluconeogenesis and glycolysis | transcript_product=Putative phosphoenolpyruvate carboxykinase with a predicted role in gluconeogenesis and glycolysis | location=ChrVII_A_nidulans_FGSC_A4:2254921-2257119(-) | protein_length=600 | sequence_SO=…	29	620	14	14	0	600	66.4	6.25	4107	42659.6	317.43	0	86.382		1.36518e+08	1.11692e+08	1.32046e+08	1.00097e+08	1.03306e+08	1.17281e+08	1.07474e+08	7.98971e+07	8.9267e+07	1.36518e+08	1.02539e+08	8.91097e+07	5.46434e+07	4.25567e+07	4.99611e+07	6.10311e+07	4.35787e+07	4.13993e+07	9	11	10	8	6	9	8	9	8	High	High	High	High	High	High	High
AN4905-T-p1	transcript=AN4905-T | gene=AN4905 | organism=Aspergillus_nidulans_FGSC_A4 | gene_product=theta class glutathione S-transferase | transcript_product=theta class glutathione S-transferase | location=ChrIII_A_nidulans_FGSC_A4:601770-602776(+) | protein_length=302 | sequence_SO=chromosome | SO=protein_coding | is_pseudo=false	26	618	9	9	0	302	34.2	9.01	4083	36995.9	354.26	0	52.236		3.20036e+08	1.22301e+08	1.22804e+08	2.50199e+08	2.47259e+08	1.73798e+08	1.87287e+08	4.02992e+08	2.32305e+08	3.20036e+08	1.12279e+08	8.2873e+07	1.36584e+08	1.01858e+08	7.4037e+07	1.06354e+08	2.19806e+08	1.07736e+08	6	7	9	9	8	7	7	7	8	High	High	High	High	High	High	High
AN1733-T-p1	transcript=AN1733-T | gene=AN1733 | organism=Aspergillus_nidulans_FGSC_A4 | gene_product=Putative delta-1-pyrroline-5-carboxylate dehydrogenase with a predicted role in glutamate and glutamine metabolism | transcript_product=Putative delta-1-pyrroline-5-carboxylate dehydrogenase with a predicted role in glutamate and glutamine metabolism | location=ChrVII_A_nidulans_FGSC_A4:1743861-1745728(+) | p…	31	618	16	16	0	572	61.9	8.72	3722	42727.1	455.68	0	69.729		3.16489e+08	3.19996e+08	2.84613e+08	3.18594e+08	2.91953e+08	2.2803e+08	2.35036e+08	2.53181e+08	5.05568e+08	3.16489e+08	2.93774e+08	1.92068e+08	173921220	1.2027e+08	9.71398e+07	1.3347e+08	1.38094e+08	2.34467e+08	11	14	14	13	14	15	14	13	13	High	High	High	High	High	High	High
AN5422-T-p1	transcript=AN5422-T | gene=AN5422 | organism=Aspergillus_nidulans_FGSC_A4 | gene_product=Putative beta-lactamase family protein | transcript_product=Putative beta-lactamase family protein | location=ChrV_A_nidulans_FGSC_A4:2863317-2864681(-) | protein_length=415 | sequence_SO=chromosome | SO=protein_coding | is_pseudo=false	41	618	13	13	0	415	45.8	5.58	7022	55384.8	429.74	0	81.711		5.67309e+07	7.33013e+07	1.04994e+08	6.84828e+07	5.60081e+07	9.24481e+07	9.99757e+07	9.33584e+07	8.75275e+07	5.67309e+07	6.72948e+07	7.08539e+07	3.73849e+07	2.30725e+07	3.93824e+07	5.67732e+07	5.0921e+07	4.05926e+07	11	12	9	10	11	12	11	10	12	High	High	High	High	High	High	High
AN8396-T-p1	transcript=AN8396-T | gene=AN8396 | organism=Aspergillus_nidulans_FGSC_A4 | gene_product=Putative pyruvate decarboxylase with a predicted role in pyruvate metabolism | transcript_product=Putative pyruvate decarboxylase with a predicted role in pyruvate metabolism | location=ChrV_A_nidulans_FGSC_A4:355537-357319(+) | protein_length=575 | sequence_SO=chromosome | SO=protein_coding | is_pseudo=false	23	616	13	13	0	575	64.7	6.54	3577	37362.1	337.84	0	80.023		5.23986e+07	4.07055e+07	6.46425e+07	7.66396e+07	9.71736e+07	6.53471e+07	9.52086e+07	7.01042e+07	1.04944e+08	5.23986e+07	3.73699e+07	4.36232e+07	4.18378e+07	4.00306e+07	2.78375e+07	5.40661e+07	3.82373e+07	4.86699e+07	10	10	11	13	10	11	10	10	12	High	High	High	High	High	High	High
AN1126-T-p1	transcript=AN1126-T | gene=AN1126 | organism=Aspergillus_nidulans_FGSC_A4 | gene_product=Putative ADP ribosylation factor involved in hyphal growth and secretion | transcript_product=Putative ADP ribosylation factor involved in hyphal growth and secretion | location=ChrVIII_A_nidulans_FGSC_A4:1443252-1444020(-) | protein_length=183 | sequence_SO=chromosome | SO=protein_coding | is_pseudo=false	34	608	4	4	0	183	21	5.72	4944	45052.2	473.29	0	44.478		2.37952e+08	1.18695e+08	1.44468e+08	1.05819e+08	1.1808e+08	1.26122e+08	1.07781e+08	1.46446e+08	4.68758e+07	2.37952e+08	1.08969e+08	9.74926e+07	5.77668e+07	4.8643e+07	5.37272e+07	6.12054e+07	79876978	2.17396e+07	4	5	4	3	3	4	5	5	4	High	High	High	High	High	High	High
AN5747-T-p1	transcript=AN5747-T | gene=AN5747 | organism=Aspergillus_nidulans_FGSC_A4 | gene_product=Ortholog(s) have protein domain specific binding activity | transcript_product=Ortholog(s) have protein domain specific binding activity | location=ChrV_A_nidulans_FGSC_A4:1818026-1819371(-) | protein_length=393 | sequence_SO=chromosome | SO=protein_coding | is_pseudo=false	44	606	16	15	1	393	44.2	5.81	2180	36793.2	442.35	0	72.675		9.36497e+07	4.52916e+08	5.50367e+08	7.56517e+07	3.58133e+08	2.86713e+08	3.52565e+08	5.68323e+08	2.09863e+08	9.36497e+07	4.15802e+08	3.71409e+08	4.12985e+07	1.47533e+08	1.22138e+08	2.00211e+08	3.09983e+08	9.7328e+07	10	10	8	9	10	9	10	9	10	High	High	High	High	High	High	High
AN3134-T-p1	transcript=AN3134-T | gene=AN3134 | organism=Aspergillus_nidulans_FGSC_A4 | gene_product=Ortholog(s) have role in cellular response to drug and chaperonin-containing T-complex, nucleus localization | transcript_product=Ortholog(s) have role in cellular response to drug and chaperonin-containing T-complex, nucleus localization | location=ChrVI_A_nidulans_FGSC_A4:1720942-1722811(-) | protein_length…	34	606	17	17	0	538	58.9	6.21	2906	37232.6	390.87	0	79.256		5.67959e+08	3.35882e+08	2.75791e+08	2.60539e+08	1.16302e+08	1.58972e+08	1.48968e+08	1.82535e+08	1.14655e+08	5.67959e+08	3.08359e+08	1.86115e+08	1.42229e+08	4.79106e+07	6.77212e+07	8.45943e+07	9.95612e+07	5.31734e+07	12	11	11	15	14	14	12	12	10	High	High	High	High	High	High	High
AN4916-T-p1	transcript=AN4916-T | gene=AN4916 | organism=Aspergillus_nidulans_FGSC_A4 | gene_product=Ortholog(s) have role in ribosome biogenesis and cell surface, cytosol, nucleolus, small-subunit processome localization | transcript_product=Ortholog(s) have role in ribosome biogenesis and cell surface, cytosol, nucleolus, small-subunit processome localization | location=ChrIII_A_nidulans_FGSC_A4:562995-563…	40	605	7	7	0	201	22.8	10.11	5183	46211.6	444.87	0	52.424		1.58756e+08	2.28236e+08	3.87529e+08	2.66408e+08	3.06339e+08	2.69023e+08	4.04381e+08	2.29491e+08	2.30052e+08	1.58756e+08	2.09533e+08	2.61519e+08	1.45433e+08	1.26196e+08	1.14602e+08	2.29636e+08	1.25172e+08	1.06691e+08	7	6	6	5	6	6	6	5	5	High	High	High	High	High	High	High
AN0843-T-p1	transcript=AN0843-T | gene=AN0843 | organism=Aspergillus_nidulans_FGSC_A4 | gene_product=Ortholog(s) have structural constituent of ribosome activity, role in rRNA export from nucleus and 90S preribosome, cytosolic small ribosomal subunit, membrane, nucleolus localization | transcript_product=Ortholog(s) have structural constituent of ribosome activity, role in rRNA export from nucleus and 90S pr…	53	605	11	11	0	215	23.9	9.01	4660	43126.5	414.67	0	52.967		1.47e+08	1.27765e+08	1.6655e+08	1.18321e+08	2.18725e+08	2.13975e+08	1.54954e+08	2.13202e+08	4.07512e+08	1.47e+08	1.17295e+08	1.12395e+08	6.45919e+07	9.01036e+07	9.11523e+07	8.79935e+07	1.16288e+08	1.88991e+08	10	8	8	9	10	10	10	10	7	High	High	High	High	High	High	High
AN5740-T-p1	transcript=AN5740-T | gene=AN5740 | organism=Aspergillus_nidulans_FGSC_A4 | gene_product=Protein with similarity to Saccharomyces cerevisiae Rho family GTPase Rho1p | transcript_product=Protein with similarity to Saccharomyces cerevisiae Rho family GTPase Rho1p | location=ChrV_A_nidulans_FGSC_A4:1835705-1836572(-) | protein_length=193 | sequence_SO=chromosome | SO=protein_coding | is_pseudo=false	43	597	7	7	0	193	21.7	6.67	3910	41776.1	393.19	0	67.864		5.65035e+08	8.03348e+08	8.31553e+08	4.47331e+08	5.70618e+08	4.47199e+08	5.30197e+08	3.25027e+08	3.01246e+08	5.65035e+08	7.37519e+08	5.61164e+08	2.44199e+08	2.35066e+08	1.90504e+08	3.01083e+08	1.77281e+08	1.39709e+08	6	5	5	6	7	7	6	6	5	High	High	High	High	High	High	High
AN0182-T-p1	transcript=AN0182-T | gene=AN0182 | organism=Aspergillus_nidulans_FGSC_A4 | gene_product=Small monomeric GTPase of the Ras superfamily involved in regulation of development | transcript_product=Small monomeric GTPase of the Ras superfamily involved in regulation of development | location=ChrVIII_A_nidulans_FGSC_A4:4350446-4351335(-) | protein_length=212 | sequence_SO=chromosome | SO=protein_codin…	33	594	7	7	0	212	23.8	4.98	8149	48173	470.71	0	48.767		3.08496e+08	2.18229e+08	1.96839e+08	2.1793e+08	2.60362e+08	2.54545e+08	1.72607e+08	2.53847e+08	1.84122e+08	3.08496e+08	2.00347e+08	1.32835e+08	1.18969e+08	1.07256e+08	1.08435e+08	9.80181e+07	1.38457e+08	8.53903e+07	7	8	8	7	7	7	6	7	8	High	High	High	High	High	High	High
AN10219-T-p1	transcript=AN10219-T | gene=AN10219 | organism=Aspergillus_nidulans_FGSC_A4 | gene_product=Transcript induced in response to calcium dichloride in a CrzA-dependent manner | transcript_product=Transcript induced in response to calcium dichloride in a CrzA-dependent manner | location=ChrVII_A_nidulans_FGSC_A4:1162632-1163260(+) | protein_length=180 | sequence_SO=chromosome | SO=protein_coding | is_…	47	587	7	7	0	180	19.1	5.26	6772	53015	536.88	0	65.788		4.97708e+07	9.44381e+07	1.07261e+08	1.12225e+08	1.6552e+08	1.46869e+08	1.82309e+08	1.40598e+08	1.8815e+08	4.97708e+07	8.66996e+07	7.23841e+07	6.12637e+07	6.81859e+07	6.25653e+07	1.03528e+08	7.6687e+07	8.72584e+07	7	7	8	7	8	8	7	7	8	High	High	High	High	High	High	High
AN5644-T-p1	transcript=AN5644-T | gene=AN5644 | organism=Aspergillus_nidulans_FGSC_A4 | gene_product=Ortholog(s) have carboxylate reductase activity, role in aldehyde catabolic process, carotenoid biosynthetic process and endosome, integral component of mitochondrial outer membrane, lipid particle localization | transcript_product=Ortholog(s) have carboxylate reductase activity, role in aldehyde catabolic pr…	33	585	14	14	0	517	56.7	8.92	4025	44048.4	271.28	0	82.066		4.9081e+07	9.30517e+07	1.26527e+08	1.45461e+08	1.48238e+08	1.61104e+08	1.40331e+08	1.568e+08	2.06762e+08	4.9081e+07	8.54267e+07	85385492	7.94078e+07	6.10664e+07	6.86295e+07	7.96899e+07	8.55244e+07	9.58899e+07	12	11	12	13	12	12	11	11	12	High	High	High	High	High	High	High
AN1851-T-p1	transcript=AN1851-T | gene=AN1851 | organism=Aspergillus_nidulans_FGSC_A4 | gene_product=Ortholog(s) have unfolded protein binding activity | transcript_product=Ortholog(s) have unfolded protein binding activity | location=ChrVII_A_nidulans_FGSC_A4:2066695-2068624(+) | protein_length=581 | sequence_SO=chromosome | SO=protein_coding | is_pseudo=false	21	584	11	11	0	581	62.6	5.03	5840	42515.1	406.73	0	67.422		1.77329e+08	2.13237e+08	1.39115e+08	1.71441e+08	1.43639e+08	1.41259e+08	1.27858e+08	1.05561e+08	1.02062e+08	1.77329e+08	1.95763e+08	9.38798e+07	9.35902e+07	5.91722e+07	6.01754e+07	7.26069e+07	5.75768e+07	4.7333e+07	9	11	11	10	10	9	10	9	8	High	High	High	High	High	High	High
AN3814-T-p1	transcript=AN3814-T | gene=AN3814 | organism=Aspergillus_nidulans_FGSC_A4 | gene_product=Putative peptidyl-prolyl cis-trans isomerase (PPIase) | transcript_product=Putative peptidyl-prolyl cis-trans isomerase (PPIase) | location=ChrII_A_nidulans_FGSC_A4:2977175-2978123(+) | protein_length=217 | sequence_SO=chromosome | SO=protein_coding | is_pseudo=false	32	583	6	6	0	217	23.6	8.87	4207	43870.6	371.27	0	40.633		5.44842e+07	2.76703e+08	1.61634e+08	1.68978e+08	2.07282e+08	1.80163e+08	2.22492e+08	1.47499e+08	1.36636e+08	5.44842e+07	2.54029e+08	1.09077e+08	9.22456e+07	8.539e+07	7.67485e+07	1.26347e+08	8.04514e+07	6.33675e+07	5	5	4	3	5	6	4	6	4	High	High	High	High	High	High	High
AN4288-T-p1	transcript=AN4288-T | gene=AN4288 | organism=Aspergillus_nidulans_FGSC_A4 | gene_product=Protein expressed at decreased levels in a hapX mutant versus wild-type | transcript_product=Protein expressed at decreased levels in a hapX mutant versus wild-type | location=ChrII_A_nidulans_FGSC_A4:1500083-1502651(-) | protein_length=760 | sequence_SO=chromosome | SO=protein_coding | is_pseudo=false	31	581	19	19	0	760	83.4	6.55	4858	47785.8	528	0	123.19		9.84681e+07	4.31734e+07	5.37164e+07	1.91212e+08	2.33042e+08	2.06897e+08	1.47981e+08	8.43457e+07	9.13274e+07	9.84681e+07	3.96356e+07	3.62499e+07	1.04383e+08	9.60018e+07	8.81369e+07	8.40338e+07	4.60051e+07	4.23548e+07	17	15	14	17	17	17	17	14	8	High	High	High	High	High	High	High
AN4727-T-p1	transcript=AN4727-T | gene=AN4727 | organism=Aspergillus_nidulans_FGSC_A4 | gene_product=UDP-glucose 4-epimerase, involved in galactose metabolism | transcript_product=UDP-glucose 4-epimerase, involved in galactose metabolism | location=ChrIII_A_nidulans_FGSC_A4:1167803-1169085(+) | protein_length=371 | sequence_SO=chromosome | SO=protein_coding | is_pseudo=false	33	578	11	11	0	371	40.5	6.46	3435	38538.3	386.79	0	70.461		7.87735e+07	7.61587e+07	1.00549e+08	1.27865e+08	1.40206e+08	4.15269e+08	3.05306e+08	1.22744e+08	1.56369e+08	7.87735e+07	6.99181e+07	6.78546e+07	6.98018e+07	5.77577e+07	1.76902e+08	1.73374e+08	6.69491e+07	7.25192e+07	10	9	10	9	11	11	8	10	9	High	High	High	High	High	High	High
AN6006-T-p1	transcript=AN6006-T | gene=AN6006 | organism=Aspergillus_nidulans_FGSC_A4 | gene_product=Karyopherin | transcript_product=Karyopherin | location=ChrI_A_nidulans_FGSC_A4:1529853-1533437(+) | protein_length=1048 | sequence_SO=chromosome | SO=protein_coding | is_pseudo=false	19	578	18	18	0	1048	118.8	4.81	2537	35789	373.46	0	94.714		1.04684e+08	6.34779e+07	6.45858e+07	1.12089e+08	4.75298e+07	6.29686e+07	5.08339e+07	1.05739e+08	6.68294e+07	1.04684e+08	5.82763e+07	4.3585e+07	6.11895e+07	1.95799e+07	2.68243e+07	2.8867e+07	5.7674e+07	3.09934e+07	14	16	15	16	12	16	13	15	14	High	High	High	High	High	High	High
AN11565-T-p1	transcript=AN11565-T | gene=AN11565 | organism=Aspergillus_nidulans_FGSC_A4 | gene_product=Ortholog(s) have proton-transporting ATP synthase activity, rotational mechanism activity and role in ATP synthesis coupled proton transport | transcript_product=Ortholog(s) have proton-transporting ATP synthase activity, rotational mechanism activity and role in ATP synthesis coupled proton transport | loc…	32	577	3	3	0	101	11.1	10.18	3608	33819.9	288.62	0	20.955		6.05426e+08	1.43359e+08	1.54458e+08	3.38653e+08	2.32786e+08	2.12606e+08	8.6735e+07	1.98302e+08	2.30301e+08	6.05426e+08	1.31612e+08	1.04234e+08	1.84872e+08	9.58962e+07	9.0569e+07	4.92542e+07	1.08161e+08	1.06807e+08	3	3	3	3	2	2	2	3	2	High	High	High	High	High	High	High
AN3842-T-p1	transcript=AN3842-T | gene=AN3842 | organism=Aspergillus_nidulans_FGSC_A4 | gene_product=Putative GTPase required for early endosome trafficking | transcript_product=Putative GTPase required for early endosome trafficking | location=ChrII_A_nidulans_FGSC_A4:2892655-2893562(-) | protein_length=218 | sequence_SO=chromosome | SO=protein_coding | is_pseudo=false	29	573	7	6	0	218	23.7	8.54	1961	30323.6	298.42	0	34.316		1.90973e+08	3.34472e+07	4.57251e+07	7.10322e+07	6.54381e+07	1.07028e+08	3.71745e+07	6.18711e+07	6.44253e+07	1.90973e+08	3.07065e+07	3.0857e+07	3.87767e+07	26957203	4.55934e+07	2.11102e+07	3.37467e+07	2.98785e+07	6	4	5	4	6	6	5	4	4	High	High	High	High	High	High	High
AN4777-T-p1	transcript=AN4777-T | gene=AN4777 | organism=Aspergillus_nidulans_FGSC_A4 | gene_product=Ortholog(s) have structural constituent of ribosome activity | transcript_product=Ortholog(s) have structural constituent of ribosome activity | location=ChrIII_A_nidulans_FGSC_A4:1021619-1022119(+) | protein_length=82 | sequence_SO=chromosome | SO=protein_coding | is_pseudo=false	46	572	4	4	0	82	8.9	9.26	3528	37860.6	114.44	0	22.102		3.38105e+08	5.51779e+08	2.72876e+08	3.68592e+08	3.01203e+08	2.38424e+08	2.61063e+08	6.60272e+08	5.00602e+08	3.38105e+08	5.06564e+08	1.84147e+08	2.01216e+08	1.24081e+08	1.01568e+08	1.4825e+08	3.60136e+08	2.32164e+08	4	4	4	4	4	4	4	4	4	High	High	High	High	High	High	High
AN5716-T-p1	transcript=AN5716-T | gene=AN5716 | organism=Aspergillus_nidulans_FGSC_A4 | gene_product=Putative inosine-5'-monophosphate dehydrogenase with a predicted role in purine metabolism | transcript_product=Putative inosine-5'-monophosphate dehydrogenase with a predicted role in purine metabolism | location=ChrV_A_nidulans_FGSC_A4:1904312-1906499(-) | protein_length=666 | sequence_SO=chromosome | SO=pr…	28	570	13	13	0	666	71.7	6.4	4150	44362.9	450.42	0	101.628		1.97139e+07	5.30603e+07	4.91856e+07	5.22049e+07	6.43726e+07	7.14269e+07	4.57814e+07	3.29705e+07	7.90753e+07	1.97139e+07	4.87124e+07	3.31923e+07	2.84988e+07	2.65183e+07	3.04275e+07	2.59979e+07	1.79833e+07	3.66727e+07	9	9	9	10	9	8	9	7	8	High	High	High	High	High	High	High
AN2914-T-p1	transcript=AN2914-T | gene=AN2914 | organism=Aspergillus_nidulans_FGSC_A4 | gene_product=Putative argininosuccinate lyase with a predicted role in arginine metabolism | transcript_product=Putative argininosuccinate lyase with a predicted role in arginine metabolism | location=ChrVI_A_nidulans_FGSC_A4:2410532-2412036(-) | protein_length=463 | sequence_SO=chromosome | SO=protein_coding | is_pseudo=…	34	569	14	14	0	463	51.8	6.32	2036	35897.1	322.31	0	95.489		7.45495e+07	8.49211e+07	8.71686e+07	1.31194e+08	1.12899e+08	1.39703e+08	1.32992e+08	1.53404e+08	1.56195e+08	7.45495e+07	7.79624e+07	5.88247e+07	7.16191e+07	4.65086e+07	5.95127e+07	7.55222e+07	8.36721e+07	7.24385e+07	12	9	10	11	12	10	10	11	10	High	High	High	High	High	High	High
AN5749-T-p1	transcript=AN5749-T | gene=AN5749 | organism=Aspergillus_nidulans_FGSC_A4 | gene_product=Has domain(s) with predicted hydrolase activity and role in metabolic process | transcript_product=Has domain(s) with predicted hydrolase activity and role in metabolic process | location=ChrV_A_nidulans_FGSC_A4:1813682-1814956(+) | protein_length=420 | sequence_SO=chromosome | SO=protein_coding | is_pseudo=f…	18	569	7	7	0	420	44.1	4.97	6517	52637.8	552.33	0	67.544		2.11845e+08	1.63389e+08	1.38977e+08	1.08717e+08	1.10277e+08	1.37081e+08	1.53544e+08	1.56527e+08	1.28585e+08	2.11845e+08	1.5e+08	9.37869e+07	5.93488e+07	4.54287e+07	5.83958e+07	8.71928e+07	8.53752e+07	5.96338e+07	6	6	6	7	7	7	4	6	7	High	High	High	High	High	High	High
AN7625-T-p1	transcript=AN7625-T | gene=AN7625 | organism=Aspergillus_nidulans_FGSC_A4 | gene_product=Putative myo-inositol-1-phosphate synthase with a predicted role in phospholipid metabolism | transcript_product=Putative myo-inositol-1-phosphate synthase with a predicted role in phospholipid metabolism | location=ChrIV_A_nidulans_FGSC_A4:2178579-2179774(-) | protein_length=382 | sequence_SO=chromosome | SO…	41	567	11	11	0	382	41.4	6.37	4630	49845.7	458.88	0	107.377		1.51077e+08	8.4491e+07	4.58282e+07	9.66871e+07	1.29425e+08	1.10093e+08	1.15352e+08	9.17969e+07	9.63133e+07	1.51077e+08	7.75676e+07	3.09266e+07	5.27818e+07	5.33167e+07	4.68992e+07	6.55049e+07	5.00693e+07	4.46671e+07	9	7	8	9	10	8	9	8	8	High	High	High	High	High	High	High
AN5719-T-p1	transcript=AN5719-T | gene=AN5719 | organism=Aspergillus_nidulans_FGSC_A4 | gene_product=Ortholog(s) have protein kinase activator activity, structural constituent of ribosome activity, role in cytoplasmic translation, positive regulation of protein kinase activity and cytosolic large ribosomal subunit localization | transcript_product=Ortholog(s) have protein kinase activator activity, structura…	83	566	6	6	0	109	11.1	4.17	3950	50458.6	530.91	0	77.572	Acetyl [N-Term]	2.60976e+08	2.3096e+08	2.47135e+08	1.666e+08	2.0087e+08	2.17916e+08	1.2724e+08	1.3475e+08	8.77534e+07	2.60976e+08	2.12035e+08	1.66776e+08	9.09474e+07	8.27484e+07	9.28311e+07	7.22558e+07	7.34972e+07	4.06973e+07	4	4	4	6	4	4	3	4	4	High	High	High	High	High	High	High
AN5879-T-p1	transcript=AN5879-T | gene=AN5879 | organism=Aspergillus_nidulans_FGSC_A4 | gene_product=Ortholog(s) have role in intracellular sterol transport and fungal-type vacuole lumen localization | transcript_product=Ortholog(s) have role in intracellular sterol transport and fungal-type vacuole lumen localization | location=ChrI_A_nidulans_FGSC_A4:1933563-1934189(-) | protein_length=169 | sequence_SO=ch…	50	566	7	7	0	169	18.3	5.02	3451	32741.8	273.63	0	39.377		1.61664e+08	1.34489e+08	1.24586e+08	7.62439e+07	1.04777e+08	1.11457e+08	1.2999e+08	1.26654e+08	1.57915e+08	1.61664e+08	1.23469e+08	8.40752e+07	4.16217e+07	4.31627e+07	4.74799e+07	7.38175e+07	6.90813e+07	7.32361e+07	7	6	6	5	6	7	6	7	6	High	High	High	High	High	High	High
AN6227-T-p1	transcript=AN6227-T | gene=AN6227 | organism=Aspergillus_nidulans_FGSC_A4 | gene_product=Ortholog(s) have hercynylcysteine sulfoxide lyase activity (ergothioneine-forming), hercynylselenocysteine lyase activity (selenoneine-forming) activity and role in ergothioneine biosynthetic process, selenoneine biosynthetic process | transcript_product=Ortholog(s) have hercynylcysteine sulfoxide lyase activ…	31	564	11	11	0	470	51.6	7.72	4954	51424.6	514.83	0	87.777		4.72969e+07	3.5508e+07	3.08896e+07	4.46261e+07	4.16295e+07	2.93855e+07	2.47632e+07	5.17284e+07	3.57558e+07	4.72969e+07	3.25984e+07	2.08455e+07	2.43615e+07	1.71493e+07	1.25181e+07	1.40623e+07	2.82145e+07	1.65824e+07	7	8	7	9	6	10	7	9	8	High	High	High	High	High	High	High
AN6368-T-p1	transcript=AN6368-T | gene=AN6368 | organism=Aspergillus_nidulans_FGSC_A4 | gene_product=Putative arginyl-tRNA synthetase with a predicted role in tRNA charging for translation | transcript_product=Putative arginyl-tRNA synthetase with a predicted role in tRNA charging for translation | location=ChrI_A_nidulans_FGSC_A4:399046-401340(-) | protein_length=710 | sequence_SO=chromosome | SO=protein_co…	32	560	20	20	0	710	79.9	8.37	3110	37525.1	389.08	0	88.353		8.5986e+07	7.2386e+07	6.90819e+07	6.85728e+07	1.01454e+08	1.01963e+08	1.02313e+08	1.16941e+08	8.9772e+07	8.5986e+07	6.64545e+07	4.66191e+07	3.74341e+07	4.17939e+07	4.34358e+07	5.81004e+07	6.37836e+07	4.16335e+07	14	15	14	16	17	15	17	16	14	High	High	High	High	High	High	High
AN5810-T-p1	transcript=AN5810-T | gene=AN5810 | organism=Aspergillus_nidulans_FGSC_A4 | gene_product=Prolidase specific for cleavage of X-Pro dipeptides | transcript_product=Prolidase specific for cleavage of X-Pro dipeptides | location=ChrI_A_nidulans_FGSC_A4:2173267-2174809(-) | protein_length=465 | sequence_SO=chromosome | SO=protein_coding | is_pseudo=false	37	559	18	18	0	465	51.7	5.55	2693	36843.1	292.73	0	87.548	Acetyl [N-Term]	1.4811e+08	1.54919e+08	1.63783e+08	1.16271e+08	1.96081e+08	2.32261e+08	1.79628e+08	2.05172e+08	1.46783e+08	1.4811e+08	1.42224e+08	1.10527e+08	6.34728e+07	8.07755e+07	9.8942e+07	1.02005e+08	1.11908e+08	6.80733e+07	15	16	15	14	15	14	16	15	14	High	High	High	High	High	High	High
AN6642-T-p1	transcript=AN6642-T | gene=AN6642 | organism=Aspergillus_nidulans_FGSC_A4 | gene_product=Putative potassium-transporting ATPase with a predicted role in energy metabolism | transcript_product=Putative potassium-transporting ATPase with a predicted role in energy metabolism | location=ChrI_A_nidulans_FGSC_A4:2710088-2713450(+) | protein_length=1066 | sequence_SO=chromosome | SO=protein_coding | is…	19	559	17	15	2	1066	117.2	5.35	3097	41952	386.49	0	92.291		1.87361e+08	1.42679e+08	1.46337e+08	1.34961e+08	1.51991e+08	1.50109e+08	1.71993e+08	9.02412e+07	2.46223e+08	1.87361e+08	1.30987e+08	9.87538e+07	7.36757e+07	6.26127e+07	6.39459e+07	9.76697e+07	4.92207e+07	1.14191e+08	12	12	15	12	15	14	15	13	11	High	High	High	High	High	High	High
AN1166-T-p1	transcript=AN1166-T | gene=AN1166 | organism=Aspergillus_nidulans_FGSC_A4 | gene_product=Ortholog(s) have RNA binding, structural constituent of ribosome activity | transcript_product=Ortholog(s) have RNA binding, structural constituent of ribosome activity | location=ChrVIII_A_nidulans_FGSC_A4:1326281-1327223(+) | protein_length=198 | sequence_SO=chromosome | SO=protein_coding | is_pseudo=false	42	558	9	9	0	198	22.1	10.17	3092	34370.1	320.11	0	54.595		2.2673e+08	1.99679e+08	2.85642e+08	2.67986e+08	2.89303e+08	1.19644e+08	2.89226e+08	2.54636e+08	2.57152e+08	2.2673e+08	1.83317e+08	1.92762e+08	1.46295e+08	1.19178e+08	5.09676e+07	1.64243e+08	1.38887e+08	1.19259e+08	7	8	8	8	8	8	8	6	7	High	High	High	High	High	High	High
AN0242-T-p1	transcript=AN0242-T | gene=AN0242 | organism=Aspergillus_nidulans_FGSC_A4 | gene_product=Ortholog(s) have cytosol localization | transcript_product=Ortholog(s) have cytosol localization | location=ChrVIII_A_nidulans_FGSC_A4:4168346-4171166(-) | protein_length=882 | sequence_SO=chromosome | SO=protein_coding | is_pseudo=false	25	558	21	21	0	882	98.1	6.43	5435	45965.6	465.14	0	101.31		1.55442e+08	1.15068e+08	1.77048e+08	1.55855e+08	1.84375e+08	1.64981e+08	7.24778e+08	2.63541e+08	3.90383e+08	1.55442e+08	1.05639e+08	1.19479e+08	8.50814e+07	7.59531e+07	7.02809e+07	4.1158e+08	1.43744e+08	1.81048e+08	18	18	14	16	17	16	17	15	15	High	High	High	High	High	High	High
AN10710-T-p1	transcript=AN10710-T | gene=AN10710 | organism=Aspergillus_nidulans_FGSC_A4 | gene_product=Ortholog(s) have phosphomannomutase activity, role in establishment or maintenance of cell polarity, protein targeting to ER and cytosol, nucleus localization | transcript_product=Ortholog(s) have phosphomannomutase activity, role in establishment or maintenance of cell polarity, protein targeting to ER and…	36	558	11	11	0	270	30.6	5.33	2226	31717.2	280.02	0	42.619		1.5426e+08	4.13189e+07	5.06781e+07	5.77255e+07	5.44227e+07	1.23037e+08	1.14886e+08	1.22818e+08	1.27591e+08	1.5426e+08	3.79331e+07	3.41995e+07	3.15125e+07	2.24194e+07	5.24131e+07	6.52401e+07	6.6989e+07	5.91727e+07	10	8	9	8	9	9	8	9	9	High	High	High	High	High	High	High
AN0229-T-p1	transcript=AN0229-T | gene=AN0229 | organism=Aspergillus_nidulans_FGSC_A4 | gene_product=Ortholog(s) have role in Golgi to plasma membrane transport and Golgi apparatus, fungal-type vacuole membrane localization | transcript_product=Ortholog(s) have role in Golgi to plasma membrane transport and Golgi apparatus, fungal-type vacuole membrane localization | location=ChrVIII_A_nidulans_FGSC_A4:42181…	18	558	12	12	0	875	97	8.34	4471	39338.8	374.36	0	87.054		1.32669e+08	1.37094e+08	1.85813e+08	1.80821e+08	2.10632e+08	1.75594e+08	2.00042e+08	1.87518e+08	9.50934e+07	1.32669e+08	125860410	1.25394e+08	9.8711e+07	8.67699e+07	7.4802e+07	1.13598e+08	1.02279e+08	4.41014e+07	9	10	11	10	9	10	10	10	10	High	High	High	High	High	High	High
AN12335-T-p1	transcript=AN12335-T | gene=AN12335 | organism=Aspergillus_nidulans_FGSC_A4 | gene_product=Protein with an acyl-CoA dehydrogenase domain | transcript_product=Protein with an acyl-CoA dehydrogenase domain | location=ChrVII_A_nidulans_FGSC_A4:3369483-3371028(-) | protein_length=447 | sequence_SO=chromosome | SO=protein_coding | is_pseudo=false	27	557	12	11	1	447	49.4	9.28	4202	38323.5	383.14	0	50.253		5.22286e+07	1.31437e+08	2.05188e+08	2.64851e+08	1.51413e+08	1.35789e+08	1.08802e+08	1.2002e+08	2.14384e+08	5.22286e+07	1.20666e+08	1.38468e+08	1.44583e+08	6.23745e+07	5.78455e+07	6.17852e+07	6.5463e+07	9.94246e+07	11	10	9	9	10	7	11	11	12	High	High	High	High	High	High	High
AN0252-T-p1	transcript=AN0252-T | gene=AN0252 | organism=Aspergillus_nidulans_FGSC_A4 | gene_product=Putative F1F0-ATPase complex gamma subunit with a predicted role in energy metabolism | transcript_product=Putative F1F0-ATPase complex gamma subunit with a predicted role in energy metabolism | location=ChrVIII_A_nidulans_FGSC_A4:4138380-4139599(+) | protein_length=296 | sequence_SO=chromosome | SO=protein_c…	29	556	7	7	0	296	31.9	7.83	5081	50797.1	530.64	0	77.998		1.27349e+08	6.97366e+07	5.17725e+07	1.7536e+08	1.70086e+08	1.8312e+08	1.00953e+08	1.54549e+08	1.81178e+08	1.27349e+08	6.40222e+07	3.49381e+07	9.57297e+07	7.00667e+07	7.80082e+07	5.7328e+07	8.42963e+07	8.40247e+07	7	6	6	6	8	7	8	6	7	High	High	High	High	High	High	High
AN8021-T-p1	transcript=AN8021-T | gene=AN8021 | organism=Aspergillus_nidulans_FGSC_A4 | gene_product=Putative vacuolar ATPase (V-ATPase), subunit A | transcript_product=Putative vacuolar ATPase (V-ATPase), subunit A | location=ChrII_A_nidulans_FGSC_A4:524009-525489(+) | protein_length=413 | sequence_SO=chromosome | SO=protein_coding | is_pseudo=false	28	555	11	11	0	413	44.3	6	7651	43399	474.63	0	63.041		1.21989e+08	1.66165e+08	1.87335e+08	2.49186e+08	2.57704e+08	3.15172e+08	2.21832e+08	3.06659e+08	3.90231e+08	1.21989e+08	1.52549e+08	1.26421e+08	1.36031e+08	1.06161e+08	1.34262e+08	1.25972e+08	1.67262e+08	1.80977e+08	10	10	11	9	9	9	10	9	8	High	High	High	High	High	High	High
AN1659-T-p1	transcript=AN1659-T | gene=AN1659 | organism=Aspergillus_nidulans_FGSC_A4 | gene_product=Putative amino acid transporter | transcript_product=Putative amino acid transporter | location=ChrVII_A_nidulans_FGSC_A4:1528821-1530387(+) | protein_length=467 | sequence_SO=chromosome | SO=protein_coding | is_pseudo=false	16	554	8	8	0	467	51.5	7.68	4676	39542.4	376.02	0	36.187		1.35174e+08	1.98667e+08	1.91134e+08	1.50849e+08	1.47679e+08	1.40105e+08	1.86892e+08	1.23507e+08	1.18146e+08	1.35174e+08	1.82388e+08	1.28984e+08	8.23486e+07	60836438	5.96839e+07	1.0613e+08	6.73652e+07	5.47927e+07	7	7	7	8	8	7	6	8	6	High	High	High	High	High	High	High
AN2917-T-p1	transcript=AN2917-T | gene=AN2917 | organism=Aspergillus_nidulans_FGSC_A4 | gene_product=Ortholog(s) have role in positive regulation of RNA polymerase II transcriptional preinitiation complex assembly, positive regulation of protein catabolic process and proteasome regulatory particle assembly, more | transcript_product=Ortholog(s) have role in positive regulation of RNA polymerase II transcript…	36	553	15	15	0	439	48.9	7.2	3279	35097.8	312.06	0	67.307		1.88531e+08	1.4952e+08	1.32389e+08	1.04425e+08	1.17346e+08	1.28635e+08	1.37362e+08	1.35613e+08	1.40833e+08	1.88531e+08	1.37268e+08	8.93411e+07	5.70057e+07	4.83408e+07	5.47978e+07	7.80039e+07	7.39684e+07	65314140	11	11	12	11	13	13	10	11	10	High	High	High	High	High	High	High
AN7169-T-p1	transcript=AN7169-T | gene=AN7169 | organism=Aspergillus_nidulans_FGSC_A4 | gene_product=NirA-dependent flavohemoprotein | transcript_product=NirA-dependent flavohemoprotein | location=ChrIV_A_nidulans_FGSC_A4:796116-797348(-) | protein_length=410 | sequence_SO=chromosome | SO=protein_coding | is_pseudo=false	31	552	9	9	0	410	44.9	6.43	3405	39183.9	364.48	0	58.109	Acetyl [N-Term]	7.93527e+07	8.12933e+07	6.38501e+07	1.07528e+08	8.84469e+07	6.29746e+07	1.0308e+08	6.94078e+07	8.76897e+07	7.93527e+07	7.46319e+07	4.30885e+07	5.86999e+07	3.64357e+07	2.68268e+07	5.85362e+07	3.78574e+07	4.06678e+07	6	7	6	9	8	8	8	6	5	High	High	High	High	High	High	High
AN6688-T-p1	transcript=AN6688-T | gene=AN6688 | organism=Aspergillus_nidulans_FGSC_A4 | gene_product=Putative septin B | transcript_product=Putative septin B | location=ChrI_A_nidulans_FGSC_A4:2853916-2855716(+) | protein_length=459 | sequence_SO=chromosome | SO=protein_coding | is_pseudo=false	25	548	10	9	0	459	52	7.42	3683	40684.6	407.08	0	60.749		2.07037e+08	1.85867e+08	2.47355e+08	2.52563e+08	2.57714e+08	1.79075e+08	2.77365e+08	2.84674e+08	9.39739e+07	2.07037e+08	1.70636e+08	1.66924e+08	1.37875e+08	1.06165e+08	7.62849e+07	1.57507e+08	1.55271e+08	4.35822e+07	8	7	6	9	9	7	8	6	5	High	High	High	High	High	High	High
AN3573-T-p1	transcript=AN3573-T | gene=AN3573 | organism=Aspergillus_nidulans_FGSC_A4 | gene_product=Has domain(s) with predicted oxidoreductase activity, oxidoreductase activity, acting on the aldehyde or oxo group of donors, NAD or NADP as acceptor activity and role in oxidation-reduction process | transcript_product=Has domain(s) with predicted oxidoreductase activity, oxidoreductase activity, acting on t…	11	545	4	3	0	446	48.3	6.64	2460	28946.7	349.67	0	14.313		242210	1.83126e+07	9.241e+06	8.69959e+06	9.30978e+06	1.01434e+06	1.13511e+07	453028	496787	242210	1.6812e+07	6.23618e+06	4.74913e+06	3.83516e+06	432104	6.44592e+06	247098	230394	2	2	2	1	3	2	2	2	2	Peak Found	High	High	High	High	Peak Found	High
AN9470-T-p1	transcript=AN9470-T | gene=AN9470 | organism=Aspergillus_nidulans_FGSC_A4 | gene_product=Urate oxidase | transcript_product=Urate oxidase | location=ChrI_A_nidulans_FGSC_A4:1659285-1660314(+) | protein_length=301 | sequence_SO=chromosome | SO=protein_coding | is_pseudo=false	39	543	9	9	0	301	34	7.64	4015	36133.9	370.86	0	67.52		8.38781e+07	1.04758e+08	8.13206e+07	1.9441e+08	9.9422e+07	9.17072e+07	7.14672e+07	1.31774e+08	1.35887e+08	8.38781e+07	9.61734e+07	5.48782e+07	1.06129e+08	4.09569e+07	3.90668e+07	4.0584e+07	7.18744e+07	6.30202e+07	7	8	7	8	7	7	7	6	7	High	High	High	High	High	High	High
AN1211-T-p1	transcript=AN1211-T | gene=AN1211 | organism=Aspergillus_nidulans_FGSC_A4 | gene_product=Has domain(s) with predicted hydrolase activity, acting on acid anhydrides, catalyzing transmembrane movement of substances, proton-transporting ATPase activity, rotational mechanism activity | transcript_product=Has domain(s) with predicted hydrolase activity, acting on acid anhydrides, catalyzing transmembr…	30	542	16	16	0	479	53.4	6.89	2968	34581.2	308.71	0	75.175		1.21706e+08	1.56687e+08	1.84605e+08	1.73037e+08	1.78755e+08	2.23491e+08	2.09771e+08	6.55427e+08	2.81748e+08	1.21706e+08	1.43848e+08	1.24578e+08	9.44615e+07	7.36382e+07	9.52059e+07	1.19123e+08	3.57493e+08	1.30666e+08	13	13	11	13	12	11	11	11	11	High	High	High	High	High	High	High
AN10399-T-p1	transcript=AN10399-T | gene=AN10399 | organism=Aspergillus_nidulans_FGSC_A4 | gene_product=Has domain(s) with predicted oxidoreductase activity and role in metabolic process | transcript_product=Has domain(s) with predicted oxidoreductase activity and role in metabolic process | location=ChrVI_A_nidulans_FGSC_A4:1003081-1004101(-) | protein_length=285 | sequence_SO=chromosome | SO=protein_coding …	45	542	11	11	0	285	30.9	8.5	3457	35347.4	394.74	0	70.688		2.89544e+07	9.136e+07	1.13758e+08	6.9035e+07	9.08647e+07	1.15042e+08	4.12796e+07	1.29318e+08	1.04334e+08	2.89544e+07	8.38737e+07	7.67685e+07	3.76864e+07	3.74317e+07	4.90075e+07	2.34414e+07	7.05347e+07	48387007	11	11	11	9	11	10	11	11	11	High	High	High	High	High	High	High
AN4475-T-p1	transcript=AN4475-T | gene=AN4475 | organism=Aspergillus_nidulans_FGSC_A4 | gene_product=Ortholog(s) have role in ribosomal large subunit assembly and cytosolic large ribosomal subunit localization | transcript_product=Ortholog(s) have role in ribosomal large subunit assembly and cytosolic large ribosomal subunit localization | location=ChrIII_A_nidulans_FGSC_A4:1930336-1931127(+) | protein_lengt…	33	538	6	6	0	175	20.1	10.07	4088	41295.9	368.3	0	33.748		6.49844e+08	9.54473e+08	8.91663e+08	7.09493e+08	6.53018e+08	6.21574e+08	7.62888e+08	6.03533e+08	1.18616e+09	6.49844e+08	8.76261e+08	6.01728e+08	3.87314e+08	2.6901e+08	2.64788e+08	4.33221e+08	3.29188e+08	5.50105e+08	6	7	7	6	6	6	7	7	7	High	High	High	High	High	High	High
AN0787-T-p1	transcript=AN0787-T | gene=AN0787 | organism=Aspergillus_nidulans_FGSC_A4 | gene_product=Putative mannosyl-oligosaccharide 1,2-alpha-mannosidase with a predicted role in mannose polymer metabolism | transcript_product=Putative mannosyl-oligosaccharide 1,2-alpha-mannosidase with a predicted role in mannose polymer metabolism | location=ChrVIII_A_nidulans_FGSC_A4:2473065-2474686(+) | protein_length…	31	537	11	11	0	505	55.8	4.94	6977	53781.9	519.06	0	94.222		1.21023e+08	1.06257e+08	9.63444e+07	9.67389e+07	8.65229e+07	9.22345e+07	8.77659e+07	1.06889e+08	9.97882e+07	1.21023e+08	9.75496e+07	6.50169e+07	5.281e+07	3.56431e+07	3.92914e+07	4.98396e+07	5.83011e+07	4.62787e+07	7	9	11	11	9	10	11	11	9	High	High	High	High	High	High	High
AN7228-T-p1	transcript=AN7228-T | gene=AN7228 | organism=Aspergillus_nidulans_FGSC_A4 | gene_product=Ortholog of A. nidulans FGSC A4 : AN1877, A. fumigatus Af293 : Afu2g17490, A. niger CBS 513.88 : An04g09550, A. oryzae RIB40 : AO090102000061 and Neosartorya fischeri NRRL 181 : NFIA_092910 | transcript_product=Ortholog of A. nidulans FGSC A4 : AN1877, A. fumigatus Af293 : Afu2g17490, A. niger CBS 513.88 : An…	30	533	14	14	0	565	63.3	8.27	3743	36953.6	350.88	0	80.564		4.81865e+07	5.17174e+07	7.27894e+07	8.07943e+07	9.38171e+07	7.6286e+07	8.23311e+07	8.8282e+07	8.67944e+07	4.81865e+07	4.74795e+07	4.91211e+07	4.41058e+07	3.86479e+07	3.24974e+07	4.67533e+07	4.81521e+07	4.02526e+07	12	12	13	11	12	13	12	12	11	High	High	High	High	High	High	High
AN4929-T-p1	transcript=AN4929-T | gene=AN4929 | organism=Aspergillus_nidulans_FGSC_A4 | gene_product=Ortholog of A. fumigatus Af293 : Afu3g10610, A. niger CBS 513.88 : An02g06220, A. oryzae RIB40 : AO090003000605, Aspergillus wentii : Aspwe1_0104935 and Aspergillus sydowii : Aspsy1_0147876 | transcript_product=Ortholog of A. fumigatus Af293 : Afu3g10610, A. niger CBS 513.88 : An02g06220, A. oryzae RIB40 : AO…	15	531	14	14	0	947	102.3	5.49	1817	29919.2	268.09	0	75.698	Acetyl [N-Term]	9.513e+07	4.89114e+07	6.78796e+07	1.17554e+08	9.4028e+07	1.11847e+08	1.10735e+08	7.18869e+07	7.51387e+07	9.513e+07	4.49034e+07	4.58078e+07	6.41729e+07	3.87348e+07	4.76461e+07	6.28831e+07	3.92096e+07	3.4847e+07	9	11	12	10	12	11	11	5	9	High	High	High	High	High	High	High
AN9097-T-p1	transcript=AN9097-T | gene=AN9097 | organism=Aspergillus_nidulans_FGSC_A4 | gene_product=Ortholog(s) have role in maturation of SSU-rRNA from tricistronic rRNA transcript (SSU-rRNA, 5.8S rRNA, LSU-rRNA) and cytosol, mitochondrion, nucleolus localization | transcript_product=Ortholog(s) have role in maturation of SSU-rRNA from tricistronic rRNA transcript (SSU-rRNA, 5.8S rRNA, LSU-rRNA) and cytoso…	41	531	7	7	0	133	15.3	10.73	3567	29924.5	262.58	0	58.931	Acetyl [N-Term]	1.59574e+07	7.19601e+07	7.91123e+07	1.01383e+08	1.25526e+08	1.15936e+08	7.05165e+07	9.849e+07	5.32528e+07	1.59574e+07	6.60634e+07	5.3388e+07	5.53451e+07	5.17104e+07	4.9388e+07	4.00442e+07	5.37199e+07	2.4697e+07	6	6	6	8	7	8	6	6	7	High	High	High	High	High	High	High
AN5954-T-p1	transcript=AN5954-T | gene=AN5954 | organism=Aspergillus_nidulans_FGSC_A4 | gene_product=Protein with reduced expression after exposure to farnesol | transcript_product=Protein with reduced expression after exposure to farnesol | location=ChrI_A_nidulans_FGSC_A4:1692073-1693644(+) | protein_length=476 | sequence_SO=chromosome | SO=protein_coding | is_pseudo=false	23	527	12	12	0	476	54.7	5.35	3346	35452.7	276.7	0	63.859		6.79797e+07	5.53282e+07	6.88566e+07	1.18537e+08	1.18633e+08	9.09519e+07	1.14748e+08	6.53495e+07	9.76773e+07	6.79797e+07	5.07944e+07	4.64671e+07	6.47098e+07	4.88709e+07	3.8745e+07	6.51617e+07	3.56439e+07	4.52997e+07	10	9	10	12	10	10	11	9	11	High	High	High	High	High	High	High
AN4402-T-p1	transcript=AN4402-T | gene=AN4402 | organism=Aspergillus_nidulans_FGSC_A4 | gene_product=Ortholog(s) have voltage-gated anion channel activity and role in DNA transport, apoptotic process, cell redox homeostasis, ion transport, mitochondrion organization | transcript_product=Ortholog(s) have voltage-gated anion channel activity and role in DNA transport, apoptotic process, cell redox homeostasis,…	29	525	9	9	0	284	29.9	9.01	2319	31496.9	245.55	0	35.063	Acetyl [N-Term]	6.11304e+08	4.06661e+08	6.40596e+08	4.83234e+08	4.26503e+08	5.27776e+08	7.65141e+08	1.09972e+09	3.99294e+08	6.11304e+08	3.73338e+08	4.32299e+08	2.63799e+08	1.75698e+08	2.2483e+08	4.345e+08	5.99823e+08	1.8518e+08	8	7	8	8	9	9	8	7	6	High	High	High	High	High	High	High
AN5132-T-p1	transcript=AN5132-T | gene=AN5132 | organism=Aspergillus_nidulans_FGSC_A4 | gene_product=Ortholog(s) have guanine nucleotide transmembrane transporter activity and role in cellular iron ion homeostasis, guanine nucleotide transport, mitochondrial genome maintenance, transmembrane transport | transcript_product=Ortholog(s) have guanine nucleotide transmembrane transporter activity and role in cell…	42	525	13	13	0	306	33	9.89	3253	34461.4	351.29	0	64.564		1.48727e+08	2.72072e+08	2.56373e+08	2.30281e+08	2.17386e+08	2.35271e+08	2.10232e+08	2.02985e+08	1.18353e+08	1.48727e+08	2.49778e+08	1.7301e+08	1.25711e+08	8.9552e+07	1.00224e+08	1.19384e+08	1.10715e+08	5.48885e+07	11	13	11	14	13	12	12	12	9	High	High	High	High	High	High	High
AN5606-T-p1	transcript=AN5606-T | gene=AN5606 | organism=Aspergillus_nidulans_FGSC_A4 | gene_product=Ortholog(s) have proton-transporting ATPase activity, rotational mechanism activity and role in endocytosis, polyphosphate metabolic process, protein complex assembly, proton transport, vacuolar acidification, vacuole organization | transcript_product=Ortholog(s) have proton-transporting ATPase activity, rota…	25	524	19	19	0	852	97.2	5.5	3901	37699.2	394.3	0	97.446		1.66558e+08	1.10419e+08	1.1726e+08	1.80135e+08	1.45661e+08	1.44884e+08	2.27811e+08	1.7353e+08	2.45816e+08	1.66558e+08	1.01371e+08	7.91313e+07	9.8336e+07	6.0005e+07	6.17199e+07	1.29367e+08	9.46496e+07	1.14002e+08	15	15	14	16	14	15	18	14	14	High	High	High	High	High	High	High
AN9067-T-p1	transcript=AN9067-T | gene=AN9067 | organism=Aspergillus_nidulans_FGSC_A4 | gene_product=Protein identified by two-hybrid interaction with NimA kinase | transcript_product=Protein identified by two-hybrid interaction with NimA kinase | location=ChrVI_A_nidulans_FGSC_A4:539364-542451(+) | protein_length=978 | sequence_SO=chromosome | SO=protein_coding | is_pseudo=false	19	523	20	20	0	978	109.9	6.34	2564	31761	258.56	0	93.596		1.86927e+08	1.49019e+08	1.62509e+08	2.90805e+08	2.17531e+08	2.15431e+08	2.28702e+08	1.7668e+08	2.00443e+08	1.86927e+08	1.36808e+08	1.09667e+08	1.58751e+08	8.9612e+07	9.17723e+07	1.29873e+08	9.63672e+07	9.29591e+07	18	13	14	17	15	11	14	12	13	High	High	High	High	High	High	High
AN2882-T-p1	transcript=AN2882-T | gene=AN2882 | organism=Aspergillus_nidulans_FGSC_A4 | gene_product=Putative homoserine dehydrogenase with a predicted role in glycine, serine, and threonine metabolism | transcript_product=Putative homoserine dehydrogenase with a predicted role in glycine, serine, and threonine metabolism | location=ChrVI_A_nidulans_FGSC_A4:2507772-2508986(+) | protein_length=368 | sequence_…	38	520	17	17	0	368	38.6	5.45	3480	34770	347.36	0	78.186		2.76549e+08	1.18571e+09	9.03336e+08	8.61603e+08	7.45487e+08	7.63941e+08	7.00623e+08	4.66276e+08	1.07396e+08	2.76549e+08	1.08855e+09	6.09606e+08	4.70352e+08	3.07103e+08	3.25435e+08	3.97862e+08	2.54323e+08	4.98072e+07	17	12	13	13	14	12	14	14	13	High	High	High	High	High	High	High
AN4060-T-p1	transcript=AN4060-T | gene=AN4060 | organism=Aspergillus_nidulans_FGSC_A4 | gene_product=Putative ribosomal protein S16 | transcript_product=Putative ribosomal protein S16 | location=ChrII_A_nidulans_FGSC_A4:2207479-2208339(-) | protein_length=148 | sequence_SO=chromosome | SO=protein_coding | is_pseudo=false	42	518	5	5	0	148	16.4	8.91	3922	38742.7	362.68	0	46.093		7.76962e+08	7.14326e+08	6.64545e+08	6.64049e+08	4.76359e+08	6.23254e+08	5.69082e+08	4.31938e+08	5.01478e+08	7.76962e+08	6.55792e+08	4.4846e+08	3.62506e+08	1.96236e+08	2.65503e+08	3.23165e+08	2.35594e+08	2.3257e+08	5	5	5	5	5	4	5	5	5	High	High	High	High	High	High	High
AN2150-T-p1	transcript=AN2150-T | gene=AN2150 | organism=Aspergillus_nidulans_FGSC_A4 | gene_product=Prolyl-tRNA synthetase | transcript_product=Prolyl-tRNA synthetase | location=ChrVII_A_nidulans_FGSC_A4:3036747-3038720(+) | protein_length=594 | sequence_SO=chromosome | SO=protein_coding | is_pseudo=false	29	518	15	15	0	594	66.1	7.14	4007	36792	358.35	0	99.244		1.08439e+08	3.78077e+07	8.46313e+07	1.33809e+08	1.10831e+08	1.31903e+08	7.69156e+07	6.2515e+07	1.08603e+08	1.08439e+08	3.47096e+07	5.71124e+07	7.30466e+07	4.56569e+07	5.619e+07	4.3678e+07	3.40979e+07	5.03668e+07	13	12	12	14	11	12	10	11	12	High	High	High	High	High	High	High
AN10020-T-p1	transcript=AN10020-T | gene=AN10020 | organism=Aspergillus_nidulans_FGSC_A4 | gene_product=Ortholog(s) have role in proteasome-mediated ubiquitin-dependent protein catabolic process and cytosol, nuclear periphery localization | transcript_product=Ortholog(s) have role in proteasome-mediated ubiquitin-dependent protein catabolic process and cytosol, nuclear periphery localization | location=ChrVII…	25	517	19	19	0	906	100.7	4.98	1983	32417	290.17	0	118.059		7.73585e+07	2.24024e+07	4.55638e+07	6.25864e+07	6.12819e+07	5.21104e+07	1.67683e+08	5.56876e+07	6.46331e+07	7.73585e+07	2.05667e+07	3.07482e+07	3.41661e+07	2.52451e+07	2.21988e+07	9.52222e+07	3.0374e+07	2.99748e+07	15	14	14	15	15	11	15	15	16	High	High	High	High	High	High	High
AN10557-T-p1	transcript=AN10557-T | gene=AN10557 | organism=Aspergillus_nidulans_FGSC_A4 | gene_product=Putative ATP-dependent RNA helicase | transcript_product=Putative ATP-dependent RNA helicase | location=ChrIII_A_nidulans_FGSC_A4:1961811-1963893(+) | protein_length=668 | sequence_SO=chromosome | SO=protein_coding | is_pseudo=false	28	513	17	16	1	668	71.2	8.65	3602	34715.9	362.28	0	87.957		5.26407e+08	7.88445e+07	8.69789e+07	7.58774e+07	5.90104e+07	6.62308e+07	8.2364e+07	7.94026e+07	6.38827e+07	5.26407e+08	7.23838e+07	5.86967e+07	4.14217e+07	2.43093e+07	2.8214e+07	4.6772e+07	4.3309e+07	2.96268e+07	13	15	16	14	13	13	14	12	13	High	High	High	High	High	High	High
AN4464-T-p1	transcript=AN4464-T | gene=AN4464 | organism=Aspergillus_nidulans_FGSC_A4 | gene_product=Putative bifunctional enzyme with a predicted role in purine metabolism | transcript_product=Putative bifunctional enzyme with a predicted role in purine metabolism | location=ChrIII_A_nidulans_FGSC_A4:1971361-1973496(+) | protein_length=595 | sequence_SO=chromosome | SO=protein_coding | is_pseudo=false	31	513	14	14	0	595	65	6.77	2377	31283.2	296.7	0	74.515		7.55788e+07	1.05966e+08	1.35637e+08	9.0248e+07	1.02555e+08	2.32527e+08	5.99678e+07	5.07524e+07	7.69577e+07	7.55788e+07	9.7283e+07	9.15327e+07	4.92666e+07	4.22474e+07	9.90552e+07	3.40539e+07	2.76822e+07	3.56906e+07	11	10	10	10	11	10	10	9	10	High	High	High	High	High	High	High
AN0317-T-p1	transcript=AN0317-T | gene=AN0317 | organism=Aspergillus_nidulans_FGSC_A4 | gene_product=Ortholog(s) have ubiquitin binding activity and role in actin cortical patch organization, endocytosis, endoplasmic reticulum unfolded protein response, positive regulation of cytokinesis | transcript_product=Ortholog(s) have ubiquitin binding activity and role in actin cortical patch organization, endocytosi…	14	510	16	16	0	1270	134.8	4.79	3422	37928.2	345.13	0	86.23		1.31994e+08	3.99266e+07	3.65917e+07	8.2896e+07	6.88481e+07	9.12205e+07	6.37731e+07	4.9115e+07	7.08223e+07	1.31994e+08	3.66549e+07	2.46935e+07	4.52531e+07	2.83619e+07	3.88595e+07	3.62148e+07	2.67891e+07	3.28452e+07	13	13	10	13	12	12	14	10	12	High	High	High	High	High	High	High
AN9408-T-p1	transcript=AN9408-T | gene=AN9408 | organism=Aspergillus_nidulans_FGSC_A4 | gene_product=Fatty acid synthase, beta subunit | transcript_product=Fatty acid synthase, beta subunit | location=ChrVIII_A_nidulans_FGSC_A4:540288-546624(+) | protein_length=2093 | sequence_SO=chromosome | SO=protein_coding | is_pseudo=false	15	508	28	28	0	2093	232.2	6.25	3133	32880	286.8	0	128.036		6.9741e+07	8.41158e+07	9.33516e+07	1.12796e+08	1.18017e+08	1.08059e+08	1.3618e+08	1.02391e+08	1.95609e+08	6.9741e+07	7.72231e+07	6.29972e+07	6.15757e+07	4.86172e+07	4.60328e+07	7.73323e+07	5.58475e+07	9.07174e+07	17	18	20	23	18	18	19	19	17	High	High	High	High	High	High	High
AN10745-T-p1	transcript=AN10745-T | gene=AN10745 | organism=Aspergillus_nidulans_FGSC_A4 | gene_product=Ortholog(s) have mitochondrion localization | transcript_product=Ortholog(s) have mitochondrion localization | location=ChrI_A_nidulans_FGSC_A4:2101219-2103220(-) | protein_length=600 | sequence_SO=chromosome | SO=protein_coding | is_pseudo=false	20	505	11	10	0	600	66.3	9.42	3846	33990.2	308.36	0	66.618		3.69285e+08	5.36209e+08	4.1301e+08	1.7291e+08	3.8416e+08	3.17535e+08	3.3613e+08	2.82947e+08	6.37175e+08	3.69285e+08	4.9227e+08	2.78715e+08	9.4392e+07	1.58255e+08	1.35268e+08	1.90878e+08	1.54329e+08	2.95502e+08	11	8	9	10	11	11	10	9	8	High	High	High	High	High	High	High
AN8692-T-p1	transcript=AN8692-T | gene=AN8692 | organism=Aspergillus_nidulans_FGSC_A4 | gene_product=Thioredoxin-dependent peroxidase | transcript_product=Thioredoxin-dependent peroxidase | location=ChrIII_A_nidulans_FGSC_A4:3111904-3112532(+) | protein_length=168 | sequence_SO=chromosome | SO=protein_coding | is_pseudo=false	52	502	8	8	0	168	18.5	5.87	2711	30350.6	229.32	0	51.241		1.8695e+08	9.77968e+07	1.10637e+08	9.63915e+07	1.3269e+08	8.49125e+07	7.10193e+07	9.7763e+07	7.19895e+07	1.8695e+08	8.9783e+07	7.46623e+07	5.26204e+07	5.46615e+07	3.61723e+07	4.03297e+07	5.33234e+07	3.33865e+07	7	6	5	7	6	5	6	5	5	High	High	High	High	High	High	High
AN4380-T-p1	transcript=AN4380-T | gene=AN4380 | organism=Aspergillus_nidulans_FGSC_A4 | gene_product=Putative ribonucleotide reductase large chain with a predicted role in nucleotide salvage pathways | transcript_product=Putative ribonucleotide reductase large chain with a predicted role in nucleotide salvage pathways | location=ChrIII_A_nidulans_FGSC_A4:2203416-2206161(+) | protein_length=851 | sequence_SO=…	22	501	16	16	0	851	95.1	6.55	1609	32561.3	277.79	0	100.518		7.12554e+07	3.13754e+07	3.22689e+07	6.94712e+07	5.63387e+07	5.72043e+07	7.36713e+07	5.36078e+07	6.2133e+07	7.12554e+07	2.88044e+07	2.17763e+07	3.79245e+07	2.32087e+07	2.43687e+07	4.18357e+07	2.92396e+07	2.88154e+07	10	11	11	11	10	10	11	11	11	High	High	High	High	High	High	High
AN6726-T-p1	transcript=AN6726-T | gene=AN6726 | organism=Aspergillus_nidulans_FGSC_A4 | gene_product=Ortholog(s) have role in proteasomal ubiquitin-independent protein catabolic process, proteasome-mediated ubiquitin-dependent protein catabolic process | transcript_product=Ortholog(s) have role in proteasomal ubiquitin-independent protein catabolic process, proteasome-mediated ubiquitin-dependent protein cat…	37	500	6	6	0	278	30.1	5.73	3943	36025.2	387.02	0	39.97		1.32635e+08	8.91865e+07	1.42486e+08	1.41894e+08	1.18263e+08	1.51194e+08	7.36701e+07	1.36991e+08	1.23694e+08	1.32635e+08	8.18783e+07	9.61548e+07	7.74606e+07	4.87184e+07	6.44078e+07	4.1835e+07	7.47195e+07	5.73656e+07	6	4	4	6	6	6	4	4	4	High	High	High	High	High	High	High
AN1883-T-p1	transcript=AN1883-T | gene=AN1883 | organism=Aspergillus_nidulans_FGSC_A4 | gene_product=Putative argininosuccinate synthase with a predicted role in arginine metabolism | transcript_product=Putative argininosuccinate synthase with a predicted role in arginine metabolism | location=ChrVII_A_nidulans_FGSC_A4:2153076-2154781(+) | protein_length=416 | sequence_SO=chromosome | SO=protein_coding | is_…	21	497	9	9	0	416	46.1	5.5	2803	31807.1	306.78	0	41.269		4.01214e+08	7.18512e+08	6.3624e+08	4.78408e+08	5.77322e+08	5.46822e+08	6.88356e+08	5.65488e+08	7.04891e+08	4.01214e+08	6.59635e+08	4.29359e+08	2.61164e+08	2.37827e+08	2.32943e+08	3.90896e+08	3.08437e+08	3.26907e+08	8	7	7	8	8	8	7	8	8	High	High	High	High	High	High	High
AN10519-T-p1	transcript=AN10519-T | gene=AN10519 | organism=Aspergillus_nidulans_FGSC_A4 | gene_product=Ortholog(s) have cytosol, nucleus localization | transcript_product=Ortholog(s) have cytosol, nucleus localization | location=ChrII_A_nidulans_FGSC_A4:1686143-1687480(+) | protein_length=424 | sequence_SO=chromosome | SO=protein_coding | is_pseudo=false	36	496	14	14	0	424	47.5	5.49	3470	34233.3	303.7	0	77.227		1.43883e+08	8.36726e+07	1.12062e+08	9.97072e+07	7.37052e+07	1.48641e+08	1.00172e+08	8.9926e+07	7.44496e+07	1.43883e+08	7.68162e+07	7.56239e+07	5.44304e+07	3.03628e+07	6.33205e+07	5.68845e+07	4.90488e+07	3.45274e+07	13	13	12	13	12	12	10	10	12	High	High	High	High	High	High	High
AN0081-T-p1	transcript=AN0081-T | gene=AN0081 | organism=Aspergillus_nidulans_FGSC_A4 | gene_product=Beta subunit of a heterotrimeric G protein composed of FadA, SfaD, GpgA and involved in regulation of proliferation and conidiophore development | transcript_product=Beta subunit of a heterotrimeric G protein composed of FadA, SfaD, GpgA and involved in regulation of proliferation and conidiophore development…	13	494	5	5	0	352	38.8	7.12	3703	31533	319.2	0	27.401		2.04799e+08	1.12846e+08	1.48449e+08	2.07443e+08	2.06566e+08	2.20438e+08	1.49207e+08	2.17054e+08	2.00597e+08	2.04799e+08	1.03599e+08	1.00179e+08	1.13244e+08	8.50947e+07	9.39053e+07	8.47302e+07	1.18389e+08	9.30309e+07	5	5	5	5	5	5	5	5	5	High	High	High	High	High	High	High
AN2092-T-p1	transcript=AN2092-T | gene=AN2092 | organism=Aspergillus_nidulans_FGSC_A4 | gene_product=Putative prolyl aminopeptidase, an enzyme known to remove N-terminal proline and hydroxyproline residues from peptides | transcript_product=Putative prolyl aminopeptidase, an enzyme known to remove N-terminal proline and hydroxyproline residues from peptides | location=ChrVII_A_nidulans_FGSC_A4:2836932-283876…	30	493	11	11	0	442	49.7	6.21	3201	34170.4	380.44	0	75.124		7.10438e+07	1.76364e+08	2.21471e+08	1.02036e+08	1.21481e+08	1.30264e+08	2.07565e+08	1.56009e+08	1.84432e+08	7.10438e+07	1.61912e+08	1.49457e+08	5.57019e+07	5.0044e+07	5.54918e+07	1.1787e+08	8.50927e+07	8.55339e+07	10	10	10	9	10	9	9	11	9	High	High	High	High	High	High	High
AN10230-T-p1	transcript=AN10230-T | gene=AN10230 | organism=Aspergillus_nidulans_FGSC_A4 | gene_product=Ortholog(s) have S-methyl-5-thioadenosine phosphorylase activity, mRNA binding activity, role in L-methionine biosynthetic process from methylthioadenosine, glutamate biosynthetic process and cytosol, nucleus localization | transcript_product=Ortholog(s) have S-methyl-5-thioadenosine phosphorylase activity,…	32	493	8	8	0	355	39.5	7.14	4155	36061.4	329.15	0	60.475		3.05246e+07	5.21298e+07	6.8013e+07	7.68195e+07	6.85865e+07	7.33555e+07	7.88159e+07	8.7266e+07	4.59826e+07	3.05246e+07	4.78581e+07	4.58978e+07	4.1936e+07	2.82542e+07	3.1249e+07	4.47571e+07	4.75979e+07	2.13253e+07	4	4	5	8	7	6	5	6	5	High	High	High	High	High	High	High
AN10585-T-p1	transcript=AN10585-T | gene=AN10585 | organism=Aspergillus_nidulans_FGSC_A4 | gene_product=Ortholog(s) have cytochrome-c oxidase activity, enzyme regulator activity, role in aerobic respiration, mitochondrial respiratory chain supercomplex assembly and mitochondrial respiratory chain complex IV, plasma membrane localization | transcript_product=Ortholog(s) have cytochrome-c oxidase activity, enzy…	13	490	2	2	0	134	15.7	9.33	2345	25615.3	250.66	0	7.369		1.612e+08	1.36811e+08	1.87488e+08	1.25496e+08	1.16512e+08	1.74835e+08	1.56778e+08	1.80229e+08	1.02617e+08	1.612e+08	1.256e+08	1.26524e+08	6.85086e+07	4.79971e+07	7.44786e+07	8.90296e+07	9.83031e+07	4.75907e+07	2	2	2	2	2	2	2	2	2	High	High	High	High	High	High	High
AN5610-T-p1	transcript=AN5610-T | gene=AN5610 | organism=Aspergillus_nidulans_FGSC_A4 | gene_product=Putative L-aminoadipate-semialdehyde dehydrogenase with a predicted role in lysine metabolism | transcript_product=Putative L-aminoadipate-semialdehyde dehydrogenase with a predicted role in lysine metabolism | location=ChrV_A_nidulans_FGSC_A4:2220929-2225366(-) | protein_length=1421 | sequence_SO=chromosome …	21	489	24	24	0	1421	155.8	5.71	2718	31490.5	261.65	0	112.525		9.41877e+07	8.06318e+07	9.8043e+07	7.30502e+07	7.55317e+07	6.73589e+07	6.44905e+07	7.15738e+07	5.27127e+07	9.41877e+07	7.40246e+07	6.61632e+07	3.98783e+07	3.11153e+07	2.86946e+07	3.66222e+07	3.90388e+07	2.44466e+07	22	15	14	17	18	15	19	18	11	High	High	High	High	High	High	High
AN4414-T-p1	transcript=AN4414-T | gene=AN4414 | organism=Aspergillus_nidulans_FGSC_A4 | gene_product=Putative diphosphomevalonate decarboxylase with a predicted role in sterol metabolism | transcript_product=Putative diphosphomevalonate decarboxylase with a predicted role in sterol metabolism | location=ChrIII_A_nidulans_FGSC_A4:2117539-2118806(+) | protein_length=404 | sequence_SO=chromosome | SO=protein_co…	32	486	10	10	0	404	43	5.59	6108	41970.3	394.33	0	68.518		1.44448e+08	8.13302e+07	9.17776e+07	8.292e+07	8.83895e+07	5.51969e+07	9.2404e+07	7.06567e+07	1.0452e+08	1.44448e+08	7.46658e+07	6.1935e+07	4.52662e+07	3.64121e+07	2.35136e+07	5.24734e+07	3.85387e+07	4.84732e+07	7	7	6	7	6	5	6	9	7	High	High	High	High	High	High	High
AN2928-T-p1	transcript=AN2928-T | gene=AN2928 | organism=Aspergillus_nidulans_FGSC_A4 | gene_product=Ortholog of A. fumigatus Af293 : Afu3g08110, A. niger CBS 513.88 : An02g11620, A. oryzae RIB40 : AO090005001467, Aspergillus wentii : Aspwe1_0078084 and Aspergillus terreus NIH2624 : ATET_01658 | transcript_product=Ortholog of A. fumigatus Af293 : Afu3g08110, A. niger CBS 513.88 : An02g11620, A. oryzae RIB40 …	8	485	5	5	0	730	73.8	4.26	3051	32716.2	311.97	0	53.268		3.02953e+07	2.22166e+07	2.44297e+07	1.72273e+07	1.86298e+07	2.10236e+07	5.81555e+07	5.55745e+07	4.82034e+07	3.02953e+07	2.03961e+07	1.64861e+07	9.40444e+06	7.67456e+06	8.95595e+06	3.30248e+07	3.03123e+07	2.23552e+07	5	4	3	4	5	4	5	5	4	High	High	High	High	High	High	High
AN7459-T-p1	transcript=AN7459-T | gene=AN7459 | organism=Aspergillus_nidulans_FGSC_A4 | gene_product=Putative hexokinase with a predicted role in carbohydrate metabolism | transcript_product=Putative hexokinase with a predicted role in carbohydrate metabolism | location=ChrIV_A_nidulans_FGSC_A4:1608307-1609646(-) | protein_length=426 | sequence_SO=chromosome | SO=protein_coding | is_pseudo=false	26	484	10	10	0	426	46.9	5.24	1511	26915.9	221.81	0	51.737		2.56955e+08	1.39619e+08	1.51577e+08	1.85104e+08	1.51803e+08	1.49027e+08	1.42866e+08	1.16557e+08	9.23395e+07	2.56955e+08	1.28178e+08	1.0229e+08	1.01049e+08	6.25354e+07	6.34847e+07	8.11292e+07	6.35742e+07	4.28242e+07	10	9	10	10	10	9	9	9	10	High	High	High	High	High	High	High
AN5529-T-p1	transcript=AN5529-T | gene=AN5529 | organism=Aspergillus_nidulans_FGSC_A4 | gene_product=Essential NDR ser/thr protein kinase | transcript_product=Essential NDR ser/thr protein kinase | location=ChrV_A_nidulans_FGSC_A4:2496912-2498860(-) | protein_length=588 | sequence_SO=chromosome | SO=protein_coding | is_pseudo=false	23	483	12	12	0	588	67	8.37	3208	31930.5	300.34	0	56.183		5.98283e+07	4.99053e+07	3.32213e+07	1.12259e+08	6.63923e+07	6.67652e+07	9.8329e+07	3.18955e+07	4.12615e+07	5.98283e+07	4.58159e+07	2.2419e+07	6.12824e+07	2.73503e+07	2.84416e+07	5.58381e+07	1.73969e+07	1.91358e+07	10	9	8	11	10	9	9	7	6	High	High	High	High	High	High	High
AN2213-T-p1	transcript=AN2213-T | gene=AN2213 | organism=Aspergillus_nidulans_FGSC_A4 | gene_product=Ortholog(s) have proteasome-activating ATPase activity | transcript_product=Ortholog(s) have proteasome-activating ATPase activity | location=ChrVII_A_nidulans_FGSC_A4:3216527-3218070(+) | protein_length=460 | sequence_SO=chromosome | SO=protein_coding | is_pseudo=false	26	475	12	12	0	460	51.1	5.85	2082	26646.9	259.69	0	58.015		1.43839e+08	1.09968e+08	1.12814e+08	1.70637e+08	1.57914e+08	1.46007e+08	1.20331e+08	1.13957e+08	1.4024e+08	1.43839e+08	1.00957e+08	7.61309e+07	9.31514e+07	6.50526e+07	6.21983e+07	6.83322e+07	6.21562e+07	6.50388e+07	11	9	11	10	9	9	9	9	9	High	High	High	High	High	High	High
AN1177-T-p1	transcript=AN1177-T | gene=AN1177 | organism=Aspergillus_nidulans_FGSC_A4 | gene_product=Ortholog(s) have cytosol, plasma membrane localization | transcript_product=Ortholog(s) have cytosol, plasma membrane localization | location=ChrVIII_A_nidulans_FGSC_A4:1288872-1291941(+) | protein_length=950 | sequence_SO=chromosome | SO=protein_coding | is_pseudo=false	22	474	19	19	0	950	105.7	5.55	3373	32173.7	297.6	0	95.144		7.70434e+07	5.93203e+07	6.28411e+07	2.68269e+08	7.24205e+07	2.62923e+08	9.66532e+07	3.13832e+08	9.05021e+07	7.70434e+07	5.44594e+07	4.24076e+07	1.46449e+08	2.98336e+07	1.12004e+08	5.48864e+07	1.71175e+08	4.19721e+07	16	17	16	16	16	14	14	15	15	High	High	High	High	High	High	High
AN6490-T-p1	transcript=AN6490-T | gene=AN6490 | organism=Aspergillus_nidulans_FGSC_A4 | gene_product=Putative phosphorylase with a predicted role in nucleotide salvage pathways | transcript_product=Putative phosphorylase with a predicted role in nucleotide salvage pathways | location=ChrI_A_nidulans_FGSC_A4:2277513-2278803(+) | protein_length=315 | sequence_SO=chromosome | SO=protein_coding | is_pseudo=false	38	472	12	12	0	315	34.6	6.58	3354	30583	319.8	0	62.888		1.24091e+08	1.84161e+08	1.81659e+08	2.73049e+08	2.61175e+08	2.42201e+08	5.07975e+08	1.35018e+08	1.55245e+08	1.24091e+08	1.69071e+08	1.2259e+08	1.49058e+08	1.07591e+08	1.03176e+08	2.88464e+08	7.36435e+07	7.19979e+07	9	11	9	9	8	8	9	10	9	High	High	High	High	High	High	High
AN5601-T-p1	transcript=AN5601-T | gene=AN5601 | organism=Aspergillus_nidulans_FGSC_A4 | gene_product=Putative saccharopine dehydrogenase (NADP+, L-glutamate-forming) with a predicted role in lysine metabolism | transcript_product=Putative saccharopine dehydrogenase (NADP+, L-glutamate-forming) with a predicted role in lysine metabolism | location=ChrV_A_nidulans_FGSC_A4:2275065-2276677(-) | protein_length=45…	20	470	12	12	0	450	49.5	5.99	2673	27099.2	200.23	0	47.452		8.16598e+07	9.72854e+07	1.57126e+08	1.72496e+08	1.25951e+08	2.49873e+08	1.57929e+08	1.33188e+08	1.61059e+08	8.16598e+07	8.93135e+07	1.06034e+08	9.4166e+07	5.18856e+07	1.06445e+08	8.96829e+07	7.26456e+07	7.46941e+07	11	10	12	8	8	10	12	11	11	High	High	High	High	High	High	High
AN5130-T-p1	transcript=AN5130-T | gene=AN5130 | organism=Aspergillus_nidulans_FGSC_A4 | gene_product=Ortholog(s) have coproporphyrinogen oxidase activity, role in cellular response to hypoxia, heme biosynthetic process and cell surface, cytosol, mitochondrion, nucleus, yeast-form cell wall localization | transcript_product=Ortholog(s) have coproporphyrinogen oxidase activity, role in cellular response to hyp…	34	470	11	11	0	454	52.3	7.85	3533	35911.5	326.77	0	104.281		2.89555e+08	3.7894e+08	3.42857e+08	3.08302e+08	3.05901e+08	2.11869e+08	2.98244e+08	2.52103e+08	2.00821e+08	2.89555e+08	3.47889e+08	2.31373e+08	1.68303e+08	1.26016e+08	9.02552e+07	1.69364e+08	1.37506e+08	9.31344e+07	10	9	10	10	9	9	9	9	9	High	High	High	High	High	High	High
AN12408-T-p1	transcript=AN12408-T | gene=AN12408 | organism=Aspergillus_nidulans_FGSC_A4 | gene_product=Ortholog(s) have role in cellular response to biotic stimulus, filamentous growth of a population of unicellular organisms in response to biotic stimulus, hyphal growth, vacuole inheritance | transcript_product=Ortholog(s) have role in cellular response to biotic stimulus, filamentous growth of a population…	21	470	11	11	0	579	62.6	5.1	2804	28152.7	272.4	0	52.271		3.08081e+07	3.10307e+07	2.56169e+07	4.64632e+07	3.34499e+07	5.49706e+07	4.93847e+07	3.91158e+07	1.27828e+08	3.08081e+07	2.84879e+07	17287264	2.53644e+07	1.37797e+07	2.34172e+07	2.8044e+07	2.13352e+07	5.92826e+07	8	9	8	9	9	9	7	8	9	High	High	High	High	High	High	High
AN4793-T-p1	transcript=AN4793-T | gene=AN4793 | organism=Aspergillus_nidulans_FGSC_A4 | gene_product=Putative aspartate semialdehyde dehydrogenase with a predicted role in glycine, serine, and threonine metabolism | transcript_product=Putative aspartate semialdehyde dehydrogenase with a predicted role in glycine, serine, and threonine metabolism | location=ChrIII_A_nidulans_FGSC_A4:973622-974828(-) | protein…	30	469	10	10	0	363	39.4	6.93	2911	30777.5	358.58	0	67.305		1.47516e+08	1.12653e+08	1.50436e+08	1.06496e+08	1.29044e+08	8.16948e+07	1.72624e+08	4.53253e+07	6.37962e+07	1.47516e+08	1.03422e+08	1.0152e+08	5.81364e+07	5.31595e+07	3.48016e+07	9.80279e+07	2.4722e+07	2.95867e+07	7	7	7	9	8	7	6	6	8	High	High	High	High	High	High	High
AN0359-T-p1	transcript=AN0359-T | gene=AN0359 | organism=Aspergillus_nidulans_FGSC_A4 | gene_product=Putative eIF3b subunit of translation initiation factor 3 (eIF3) | transcript_product=Putative eIF3b subunit of translation initiation factor 3 (eIF3) | location=ChrVIII_A_nidulans_FGSC_A4:3797400-3799815(+) | protein_length=738 | sequence_SO=chromosome | SO=protein_coding | is_pseudo=false	22	469	15	15	0	738	84.2	5.29	2328	31614.6	331.01	0	83.627		6.95738e+07	7.18853e+07	6.46423e+07	9.89536e+07	8.85074e+07	1.01426e+08	7.8996e+07	1.20061e+08	4.94697e+07	6.95738e+07	6.59948e+07	4.36231e+07	5.4019e+07	3.64606e+07	4.32071e+07	4.48594e+07	6.54853e+07	2.29425e+07	10	11	9	13	12	10	10	12	8	High	High	High	High	High	High	High
AN0381-T-p1	transcript=AN0381-T | gene=AN0381 | organism=Aspergillus_nidulans_FGSC_A4 | gene_product=Ortholog(s) have unfolded protein binding activity, role in protein folding and chaperonin-containing T-complex, nucleus localization | transcript_product=Ortholog(s) have unfolded protein binding activity, role in protein folding and chaperonin-containing T-complex, nucleus localization | location=ChrVIII_A_…	37	467	16	16	0	531	57.1	5.99	2452	28106	207	0	75.842		1.31093e+08	1.60329e+08	1.20804e+08	1.29559e+08	3.54294e+08	2.62623e+08	2.45173e+08	1.57356e+08	2.08808e+08	1.31093e+08	1.47191e+08	8.15233e+07	7.07268e+07	1.45952e+08	1.11876e+08	1.39226e+08	8.58272e+07	9.68388e+07	12	12	12	15	14	12	10	12	12	High	High	High	High	High	High	High
AN6547-T-p1	transcript=AN6547-T | gene=AN6547 | organism=Aspergillus_nidulans_FGSC_A4 | gene_product=Ortholog(s) have role in proteasomal ubiquitin-independent protein catabolic process, proteasome-mediated ubiquitin-dependent protein catabolic process | transcript_product=Ortholog(s) have role in proteasomal ubiquitin-independent protein catabolic process, proteasome-mediated ubiquitin-dependent protein cat…	35	466	10	10	0	259	28.6	5.26	1121	23282.5	118.58	0	49.939		1.16026e+08	2.16469e+07	1.6588e+07	7.11888e+07	4.91619e+07	3.76325e+07	3.43253e+07	8.19689e+07	5.35356e+07	1.16026e+08	1.98731e+07	1.11942e+07	3.88622e+07	2.02522e+07	1.60312e+07	1.94923e+07	4.47087e+07	2.48282e+07	7	8	6	8	7	9	10	8	8	High	High	High	High	High	High	High
AN6631-T-p1	transcript=AN6631-T | gene=AN6631 | organism=Aspergillus_nidulans_FGSC_A4 | gene_product=Putative F1F0-ATPase complex subunit with a predicted role in energy metabolism | transcript_product=Putative F1F0-ATPase complex subunit with a predicted role in energy metabolism | location=ChrI_A_nidulans_FGSC_A4:2680757-2681475(+) | protein_length=173 | sequence_SO=chromosome | SO=protein_coding | is_pseu…	50	465	6	6	0	173	19.5	8.28	6918	40354	430.27	0	36.508		2.51313e+08	2.77547e+08	2.49145e+08	2.04143e+08	1.46906e+08	1.3725e+08	2.18125e+08	1.03911e+08	1.53323e+08	2.51313e+08	2.54804e+08	1.68133e+08	1.11442e+08	6.0518e+07	5.84679e+07	1.23866e+08	5.66766e+07	7.11065e+07	4	5	4	5	5	5	4	5	5	High	High	High	High	High	High	High
AN4086-T-p1	transcript=AN4086-T | gene=AN4086 | organism=Aspergillus_nidulans_FGSC_A4 | gene_product=Ortholog(s) have phenylalanine-tRNA ligase activity, role in cellular response to drug, phenylalanyl-tRNA aminoacylation and cytosol, nucleus, phenylalanine-tRNA ligase complex localization | transcript_product=Ortholog(s) have phenylalanine-tRNA ligase activity, role in cellular response to drug, phenylalany…	25	464	12	12	0	600	67.7	5.6	1532	26009.2	275.61	0	55.609		4.15073e+07	1.2552e+08	7.13384e+07	6.59323e+07	7.89681e+07	8.2794e+07	6.03581e+07	9.33573e+07	7.18801e+07	4.15073e+07	1.15234e+08	4.81419e+07	3.59926e+07	3.25309e+07	3.52698e+07	3.42755e+07	5.09203e+07	3.33358e+07	9	8	9	10	10	9	7	7	9	High	High	High	High	High	High	High
AN10296-T-p1	transcript=AN10296-T | gene=AN10296 | organism=Aspergillus_nidulans_FGSC_A4 | gene_product=Ortholog(s) have fumarate reductase (NADH) activity, role in cellular response to anoxia and cytosol, mitochondrion, plasma membrane, ribosome localization | transcript_product=Ortholog(s) have fumarate reductase (NADH) activity, role in cellular response to anoxia and cytosol, mitochondrion, plasma membran…	49	464	17	17	0	484	51.9	6.15	3525	37793.6	365.26	0	118.296		5.11514e+07	5.0585e+07	4.1885e+07	7.10455e+07	6.40895e+07	4.11408e+07	3.04606e+07	3.42643e+07	2.22857e+07	5.11514e+07	4.64399e+07	2.82656e+07	3.87839e+07	2.64017e+07	1.75258e+07	1.72977e+07	1.8689e+07	1.03354e+07	14	13	10	14	11	10	10	12	7	High	High	High	High	High	High	High
AN4085-T-p1	transcript=AN4085-T | gene=AN4085 | organism=Aspergillus_nidulans_FGSC_A4 | gene_product=Ortholog(s) have role in asymmetric protein localization to old mitotic spindle pole body, establishment or maintenance of cytoskeleton polarity, negative regulation of septation initiation signaling | transcript_product=Ortholog(s) have role in asymmetric protein localization to old mitotic spindle pole body…	31	463	18	18	0	616	69	4.81	3153	31322.6	313.21	0	97.472		4.94561e+07	1.22777e+08	1.35377e+08	2.16286e+08	2.04221e+08	1.81386e+08	1.84079e+08	2.4136e+08	1.60243e+08	4.94561e+07	1.12716e+08	9.13578e+07	1.18071e+08	8.41287e+07	7.72694e+07	1.04533e+08	1.31646e+08	7.43158e+07	11	14	13	13	10	12	11	13	13	High	High	High	High	High	High	High
AN10540-T-p1	transcript=AN10540-T | gene=AN10540 | organism=Aspergillus_nidulans_FGSC_A4 | gene_product=Ortholog(s) have dipeptidyl-peptidase activity and cytoplasm, nucleus localization | transcript_product=Ortholog(s) have dipeptidyl-peptidase activity and cytoplasm, nucleus localization | location=ChrIII_A_nidulans_FGSC_A4:2400481-2402725(+) | protein_length=707 | sequence_SO=chromosome | SO=protein_coding…	25	460	17	17	0	707	78.9	5.62	2454	31391.1	246.43	0	81.568		7.2114e+07	1.1522e+08	1.08827e+08	2.18215e+08	2.21264e+08	1.8769e+08	2.59449e+08	2.76487e+08	3.10067e+08	7.2114e+07	1.05779e+08	7.34405e+07	1.19124e+08	9.11495e+07	7.99551e+07	1.47333e+08	1.50806e+08	1.43799e+08	10	17	16	12	10	9	12	15	14	High	High	High	High	High	High	High
AN8722-T-p1	transcript=AN8722-T | gene=AN8722 | organism=Aspergillus_nidulans_FGSC_A4 | gene_product=Putative ATP-dependent RNA helicase | transcript_product=Putative ATP-dependent RNA helicase | location=ChrIII_A_nidulans_FGSC_A4:3020958-3022754(+) | protein_length=369 | sequence_SO=chromosome | SO=protein_coding | is_pseudo=false	15	458	5	5	0	369	41.6	7.85	3908	34445.6	364.58	0	28.935		5.6985e+07	1.33644e+08	1.64033e+08	1.59089e+08	1.08733e+08	1.26325e+08	1.3364e+08	1.32616e+08	1.20367e+08	5.6985e+07	122693019	1.10696e+08	8.68471e+07	4.47927e+07	5.38138e+07	7.58904e+07	7.23332e+07	5.58227e+07	6	6	6	6	6	6	6	6	6	High	High	High	High	High	High	High
AN7035-T-p1	transcript=AN7035-T | gene=AN7035 | organism=Aspergillus_nidulans_FGSC_A4 | gene_product=Has domain(s) with predicted peptidase activity and role in proteolysis | transcript_product=Has domain(s) with predicted peptidase activity and role in proteolysis | location=ChrIV_A_nidulans_FGSC_A4:1240695-1241969(+) | protein_length=390 | sequence_SO=chromosome | SO=protein_coding | is_pseudo=false	29	454	10	10	0	390	43.2	5.54	4145	36785.6	331.15	0	82.21		4.97726e+07	2.6154e+07	1.92489e+07	1.17053e+08	1.33271e+08	1.28708e+08	1.03534e+08	3.98466e+07	1.30004e+08	4.97726e+07	2.40109e+07	1.29899e+07	6.38994e+07	5.49008e+07	5.4829e+07	5.87938e+07	2.17337e+07	6.0292e+07	7	9	7	8	9	9	10	7	8	High	High	High	High	High	High	High
AN8866-T-p1	transcript=AN8866-T | gene=AN8866 | organism=Aspergillus_nidulans_FGSC_A4 | gene_product=Putative phosphoglycerate dehydrogenase with a predicted role in glycine, serine, and threonine metabolism | transcript_product=Putative phosphoglycerate dehydrogenase with a predicted role in glycine, serine, and threonine metabolism | location=ChrIII_A_nidulans_FGSC_A4:2554837-2556597(+) | protein_length=47…	23	451	9	9	0	475	52.1	6.02	1720	24370.2	216.31	0	45.497		1.03968e+08	7.14974e+07	8.13167e+07	5.89208e+07	6.63935e+07	2.62277e+07	5.68885e+07	1.73384e+08	1.55486e+08	1.03968e+08	6.56387e+07	5.48756e+07	3.2165e+07	2.73508e+07	1.11729e+07	3.23052e+07	9.45696e+07	7.21095e+07	7	8	6	8	8	5	9	6	8	High	High	High	High	High	High	High
AN6804-T-p1	transcript=AN6804-T | gene=AN6804 | organism=Aspergillus_nidulans_FGSC_A4 | gene_product=Predicted transporter of the major facilitator superfamily (MFS) | transcript_product=Predicted transporter of the major facilitator superfamily (MFS) | location=ChrI_A_nidulans_FGSC_A4:3226299-3228658(-) | protein_length=619 | sequence_SO=chromosome | SO=protein_coding | is_pseudo=false	14	451	7	7	0	619	68.7	7.68	5514	40015.5	450.11	0	64.815		1.41854e+07	2.70413e+07	3.34262e+07	2.38528e+07	3.14576e+07	4.06919e+07	3.04527e+07	4.16896e+07	4.00987e+07	1.41854e+07	2.48255e+07	2.25573e+07	1.30213e+07	1.2959e+07	1.73345e+07	1.72932e+07	2.2739e+07	1.85965e+07	7	6	6	7	5	6	6	7	6	High	High	High	High	High	High	High
AN1085-T-p1	transcript=AN1085-T | gene=AN1085 | organism=Aspergillus_nidulans_FGSC_A4 | gene_product=Ortholog(s) have GTPase activity, role in cellular response to drug, endoplasmic reticulum inheritance, endoplasmic reticulum membrane fusion, hexose transport, pathogenesis and cortical endoplasmic reticulum, cytosol localization | transcript_product=Ortholog(s) have GTPase activity, role in cellular respons…	24	451	17	17	0	858	96.7	5.6	3210	31075.8	305.97	0	90.925		7.28301e+07	5.84419e+07	7.13847e+07	5.36308e+07	7.15333e+07	7.28109e+07	6.57053e+07	9.29599e+07	6.29698e+07	7.28301e+07	5.3653e+07	4.81731e+07	2.92772e+07	2.94681e+07	3.10171e+07	3.7312e+07	5.07036e+07	2.92035e+07	12	12	12	14	13	13	13	14	12	High	High	High	High	High	High	High
AN5670-T-p1	transcript=AN5670-T | gene=AN5670 | organism=Aspergillus_nidulans_FGSC_A4 | gene_product=Ortholog(s) have role in mitochondrial respiratory chain complex I assembly and mitochondrial membrane localization | transcript_product=Ortholog(s) have role in mitochondrial respiratory chain complex I assembly and mitochondrial membrane localization | location=ChrV_A_nidulans_FGSC_A4:2023396-2024159(-) | p…	31	449	7	7	0	197	21.2	9.26	5592	37987.9	405.61	0	39.645		1.8204e+08	8.18446e+07	9.18775e+07	1.72146e+08	1.72188e+08	1.15377e+08	8.23879e+07	1.36077e+08	9.77298e+07	1.8204e+08	7.5138e+07	6.20024e+07	9.3975e+07	7.09328e+07	4.915e+07	4.67856e+07	7.42209e+07	4.53241e+07	5	6	6	6	5	7	5	5	6	High	High	High	High	High	High	High
AN12027-T-p1	transcript=AN12027-T | gene=AN12027 | organism=Aspergillus_nidulans_FGSC_A4 | gene_product=Non-essential protein of unknown function, similar to MvlA | transcript_product=Non-essential protein of unknown function, similar to MvlA | location=ChrIII_A_nidulans_FGSC_A4:3299432-3300883(+) | protein_length=435 | sequence_SO=chromosome | SO=protein_coding | is_pseudo=false	36	449	13	13	0	435	48.2	5.55	3296	32335.3	295.34	0	79.901		3.98923e+07	3.39641e+07	4.13197e+07	3.36051e+07	4.18537e+07	4.58451e+07	2.92976e+07	5.43292e+07	1.02042e+08	3.98923e+07	3.1181e+07	2.78841e+07	1.83451e+07	1.72416e+07	1.95298e+07	1.66372e+07	2.96331e+07	4.73237e+07	11	11	11	7	8	10	10	9	8	High	High	High	High	High	High	High
AN0472-T-p1	transcript=AN0472-T | gene=AN0472 | organism=Aspergillus_nidulans_FGSC_A4 | gene_product=Putative 1,3-beta-glucosidase with a role in carbon starvation-induced autolytic cell wall degradation | transcript_product=Putative 1,3-beta-glucosidase with a role in carbon starvation-induced autolytic cell wall degradation | location=ChrVIII_A_nidulans_FGSC_A4:3449868-3452882(+) | protein_length=923 | seq…	16	448	13	13	0	923	99.5	5.76	2522	30155.5	301.37	0	71.002		8.23575e+07	1.04164e+08	1.36744e+08	1.0171e+08	1.20253e+08	1.18063e+08	1.15383e+08	1.06337e+08	5.44427e+07	8.23575e+07	9.56285e+07	9.22798e+07	5.55237e+07	4.95383e+07	5.02941e+07	6.55223e+07	5.8e+07	2.52489e+07	12	11	10	11	11	14	11	12	11	High	High	High	High	High	High	High
AN0651-T-p1	transcript=AN0651-T | gene=AN0651 | organism=Aspergillus_nidulans_FGSC_A4 | gene_product=Alpha subunit of a heterotrimeric G protein composed of FadA, SfaD, GpgA and involved in regulation of proliferation and conidiophore development | transcript_product=Alpha subunit of a heterotrimeric G protein composed of FadA, SfaD, GpgA and involved in regulation of proliferation and conidiophore developme…	34	446	13	12	1	353	40.7	5.1	4021	35655.1	332.44	0	81.806		2.73364e+08	5.65051e+08	4.89226e+08	5.43677e+08	5.00621e+08	4.55598e+08	5.14802e+08	2.80025e+08	1.24351e+08	2.73364e+08	5.18749e+08	3.30148e+08	2.96795e+08	2.06231e+08	1.94083e+08	2.92341e+08	1.52735e+08	5.76704e+07	11	11	9	10	10	10	11	10	11	High	High	High	High	High	High	High
AN8233-T-p1	transcript=AN8233-T | gene=AN8233 | organism=Aspergillus_nidulans_FGSC_A4 | gene_product=Ortholog(s) have phosphatidylinositol transporter activity | transcript_product=Ortholog(s) have phosphatidylinositol transporter activity | location=ChrII_A_nidulans_FGSC_A4:1221759-1223040(-) | protein_length=409 | sequence_SO=chromosome | SO=protein_coding | is_pseudo=false	39	444	13	13	0	409	44.5	5.05	3890	32588.9	335.13	0	76.648		1.18172e+08	1.3036e+08	1.03193e+08	1.01686e+08	9.12195e+07	8.95223e+07	1.47613e+08	1.23953e+08	8.83728e+07	1.18172e+08	1.19678e+08	6.96388e+07	5.55106e+07	3.75779e+07	3.8136e+07	8.3825e+07	6.7608e+07	4.09846e+07	10	9	10	11	10	11	10	9	11	High	High	High	High	High	High	High
AN3918-T-p1	transcript=AN3918-T | gene=AN3918 | organism=Aspergillus_nidulans_FGSC_A4 | gene_product=Ortholog(s) have aminopeptidase activity, role in protein catabolic process in the vacuole and fungal-type vacuole localization | transcript_product=Ortholog(s) have aminopeptidase activity, role in protein catabolic process in the vacuole and fungal-type vacuole localization | location=ChrII_A_nidulans_FGSC_…	32	443	11	11	0	502	54.4	4.82	3333	27453.1	307.87	0	65.286		2.151e+08	3.30221e+08	3.43824e+08	2.45603e+08	2.58503e+08	2.62982e+08	3.28097e+08	2.29733e+08	1.4334e+08	2.151e+08	3.03161e+08	2.32025e+08	1.34075e+08	1.0649e+08	1.12029e+08	1.86316e+08	1.25305e+08	6.64766e+07	8	7	9	9	8	7	9	7	8	High	High	High	High	High	High	High
AN3973-T-p1	transcript=AN3973-T | gene=AN3973 | organism=Aspergillus_nidulans_FGSC_A4 | gene_product=Putative peroxiredoxin | transcript_product=Putative peroxiredoxin | location=ChrII_A_nidulans_FGSC_A4:2462889-2463772(+) | protein_length=261 | sequence_SO=chromosome | SO=protein_coding | is_pseudo=false	39	441	10	7	0	261	29	8.75	2565	28385.7	293.09	0	50.735		1.93403e+07	2.68131e+07	1.78366e+07	3.08953e+07	2.17522e+07	1.74452e+07	2.35027e+07	1.19304e+07	4.42937e+07	1.93403e+07	2.4616e+07	1.20368e+07	1.68658e+07	8.96082e+06	7.43156e+06	1.33465e+07	6.50724e+06	2.0542e+07	5	5	5	6	6	6	5	6	6	High	High	High	High	High	High	High
AN0753-T-p1	transcript=AN0753-T | gene=AN0753 | organism=Aspergillus_nidulans_FGSC_A4 | gene_product=Ortholog(s) have cytosol localization | transcript_product=Ortholog(s) have cytosol localization | location=ChrVIII_A_nidulans_FGSC_A4:2567272-2568882(-) | protein_length=484 | sequence_SO=chromosome | SO=protein_coding | is_pseudo=false	25	438	12	12	0	484	54.3	9.19	1982	29889.3	204.63	0	66.31		1.04734e+08	1.06746e+08	1.777e+08	1.49462e+08	3.77553e+08	4.72822e+08	1.74386e+08	2.17482e+08	2.05578e+08	1.04734e+08	9.79989e+07	1.19919e+08	8.1592e+07	1.55533e+08	2.0142e+08	9.90287e+07	1.18622e+08	9.5341e+07	12	11	12	10	9	11	9	11	12	High	High	High	High	High	High	High
AN10783-T-p1	transcript=AN10783-T | gene=AN10783 | organism=Aspergillus_nidulans_FGSC_A4 | gene_product=Has domain(s) with predicted coenzyme binding, oxidoreductase activity, oxidoreductase activity, acting on the CH-OH group of donors, NAD or NADP as acceptor, phosphogluconate dehydrogenase (decarboxylating) activity | transcript_product=Has domain(s) with predicted coenzyme binding, oxidoreductase activity…	36	437	10	10	0	316	33.3	6.39	2370	30670.8	284.19	0	57.257	Acetyl [N-Term]	1.19013e+08	6.41139e+07	9.55667e+07	7.30679e+07	6.73879e+07	9.81893e+07	1.1505e+08	1.18673e+08	1.1222e+08	1.19013e+08	5.88602e+07	6.44921e+07	3.9888e+07	2.77604e+07	4.18281e+07	6.53333e+07	6.47286e+07	5.20442e+07	8	6	8	7	8	8	9	9	8	High	High	High	High	High	High	High
AN11015-T-p1	transcript=AN11015-T | gene=AN11015 | organism=Aspergillus_nidulans_FGSC_A4 | gene_product=Has domain(s) with predicted S-(hydroxymethyl)glutathione synthase activity, carbon-sulfur lyase activity, zinc ion binding activity and role in formaldehyde catabolic process, metabolic process | transcript_product=Has domain(s) with predicted S-(hydroxymethyl)glutathione synthase activity, carbon-sulfur l…	44	432	4	4	0	197	21.1	7.71	2863	31058.1	295.33	0	48.707	Acetyl [N-Term]	1.78338e+08	1.60604e+07	1.82384e+07	4.03649e+07	5.42045e+07	2.76298e+07	1.74492e+07	1.52789e+07	1.26332e+07	1.78338e+08	1.47443e+07	12307956	2.20353e+07	2.23295e+07	1.17702e+07	9.9089e+06	8.33365e+06	5.85891e+06	4	3	3	4	3	4	2	2	3	High	High	High	High	High	High	High
AN3226-T-p1	transcript=AN3226-T | gene=AN3226 | organism=Aspergillus_nidulans_FGSC_A4 | gene_product=Has domain protein | transcript_product=Has domain protein | location=ChrVI_A_nidulans_FGSC_A4:1407044-1408066(+) | protein_length=312 | sequence_SO=chromosome | SO=protein_coding | is_pseudo=false	18	429	7	7	0	312	34.2	9.41	2739	31986.4	316.79	0	35.046		1.74478e+08	1.85295e+08	2.28486e+08	4.5201e+08	2.9347e+08	1.70465e+08	1.61846e+08	2.31179e+08	9.22704e+07	1.74478e+08	1.70112e+08	1.54191e+08	2.46754e+08	1.20895e+08	7.26172e+07	9.19077e+07	1.26093e+08	4.27922e+07	6	6	7	5	6	7	5	5	5	High	High	High	High	High	High	High
AN2954-T-p1	transcript=AN2954-T | gene=AN2954 | organism=Aspergillus_nidulans_FGSC_A4 | gene_product=Ortholog of A. fumigatus Af293 : Afu3g07870, A. niger CBS 513.88 : An02g11390, A. oryzae RIB40 : AO090005001484, Aspergillus wentii : Aspwe1_0029219 and Aspergillus sydowii : Aspsy1_0042610 | transcript_product=Ortholog of A. fumigatus Af293 : Afu3g07870, A. niger CBS 513.88 : An02g11390, A. oryzae RIB40 : AO…	13	428	7	7	0	912	95.9	4.42	4630	34011.2	373.55	0	92.699		1.37656e+07	4.42659e+07	3.96109e+07	3.31532e+07	2.48725e+07	2.64665e+07	4.31815e+07	7.96691e+07	7.05783e+07	1.37656e+07	4.06386e+07	2.6731e+07	1.80984e+07	1.02462e+07	1.12746e+07	2.45215e+07	4.34543e+07	3.2732e+07	8	8	7	8	7	7	7	7	7	High	High	High	High	High	High	High
AN0687-T-p1	transcript=AN0687-T | gene=AN0687 | organism=Aspergillus_nidulans_FGSC_A4 | gene_product=Putative spermine or spermidine synthase with a predicted role in arginine metabolism | transcript_product=Putative spermine or spermidine synthase with a predicted role in arginine metabolism | location=ChrVIII_A_nidulans_FGSC_A4:2789641-2791128(-) | protein_length=292 | sequence_SO=chromosome | SO=protein_c…	34	426	8	8	0	292	33.3	5.41	2326	27083.1	238.74	0	40.864	Acetyl [N-Term]	5.66736e+07	4.75465e+07	6.05946e+07	8.08966e+07	1.1041e+08	8.63368e+07	6.42676e+07	7.54735e+07	5.05779e+07	5.66736e+07	4.36504e+07	4.08915e+07	4.41617e+07	4.54835e+07	3.6779e+07	3.64956e+07	4.11659e+07	2.34565e+07	7	7	7	7	6	8	7	7	7	High	High	High	High	High	High	High
AN5717-T-p1	transcript=AN5717-T | gene=AN5717 | organism=Aspergillus_nidulans_FGSC_A4 | gene_product=Non-essential karyopherin family protein | transcript_product=Non-essential karyopherin family protein | location=ChrV_A_nidulans_FGSC_A4:1899930-1903567(-) | protein_length=1095 | sequence_SO=chromosome | SO=protein_coding | is_pseudo=false	22	426	18	18	0	1095	121.1	4.79	2358	27135.6	239.73	0	84.597		7.42946e+07	8.0735e+07	9.16319e+07	1.43423e+08	7.63715e+07	1.05433e+08	8.01264e+07	8.19866e+07	1.06797e+08	7.42946e+07	7.41193e+07	6.18367e+07	7.82951e+07	3.14612e+07	4.49141e+07	4.55014e+07	4.47184e+07	4.95289e+07	12	12	12	12	10	13	11	12	12	High	High	High	High	High	High	High
AN8496-T-p1	transcript=AN8496-T | gene=AN8496 | organism=Aspergillus_nidulans_FGSC_A4 | gene_product=Has domain(s) with predicted metal ion binding activity | transcript_product=Has domain(s) with predicted metal ion binding activity | location=ChrV_A_nidulans_FGSC_A4:684283-685479(-) | protein_length=292 | sequence_SO=chromosome | SO=protein_coding | is_pseudo=false	44	426	9	9	0	292	31.2	7.03	2533	31680	281.74	0	59.777		1.10873e+08	1.07323e+08	7.3986e+07	1.0616e+08	6.85779e+07	6.08623e+07	4.45571e+07	2.08641e+07	7.04107e+07	1.10873e+08	9.85286e+07	4.99286e+07	5.79531e+07	2.82507e+07	2.5927e+07	2.53026e+07	1.138e+07	3.26543e+07	7	7	7	7	8	6	7	7	7	High	High	High	High	High	High	High
AN0262-T-p1	transcript=AN0262-T | gene=AN0262 | organism=Aspergillus_nidulans_FGSC_A4 | gene_product=Ortholog(s) have role in ribosomal large subunit assembly and cytosolic large ribosomal subunit, nucleolus, preribosome, large subunit precursor localization | transcript_product=Ortholog(s) have role in ribosomal large subunit assembly and cytosolic large ribosomal subunit, nucleolus, preribosome, large subu…	44	425	6	6	0	165	17.9	9.73	3542	30806.4	327.2	0	34.451		3.67374e+08	3.19187e+08	7.93102e+08	8.26381e+08	8.76163e+08	1.15669e+09	1.44239e+09	1.25013e+09	9.9447e+08	3.67374e+08	2.93032e+08	5.35216e+08	4.51124e+08	3.60935e+08	4.92744e+08	8.1909e+08	6.81863e+08	4.61205e+08	6	6	6	6	5	3	5	4	3	High	High	High	High	High	High	High
AN10172-T-p1	transcript=AN10172-T | gene=AN10172 | organism=Aspergillus_nidulans_FGSC_A4 | gene_product=Ortholog(s) have dicarboxylic acid transmembrane transporter activity, role in mitochondrial transport and mitochondrial inner membrane localization | transcript_product=Ortholog(s) have dicarboxylic acid transmembrane transporter activity, role in mitochondrial transport and mitochondrial inner membrane lo…	31	425	7	7	0	306	33.3	9.7	691	21295.6	96.6	0	44.353		7.88894e+07	6.87102e+07	1.10089e+08	9.01849e+07	7.37941e+07	1.07295e+08	1.13935e+08	1.80937e+08	5.87377e+07	7.88894e+07	6.30799e+07	7.4292e+07	4.92322e+07	3.03995e+07	4.57073e+07	6.46999e+07	9.86896e+07	2.72407e+07	5	6	4	5	4	5	5	6	4	High	High	High	High	High	High	High
AN0261-T-p1	transcript=AN0261-T | gene=AN0261 | organism=Aspergillus_nidulans_FGSC_A4 | gene_product=COPII coat component | transcript_product=COPII coat component | location=ChrVIII_A_nidulans_FGSC_A4:4113269-4115899(-) | protein_length=771 | sequence_SO=chromosome | SO=protein_coding | is_pseudo=false	13	423	9	9	0	771	85.6	6.21	3022	27624.1	252.74	0	50.059		6.87079e+07	4.57914e+07	4.14327e+07	8.76956e+07	1.0783e+08	6.18335e+07	8.43758e+07	6.2316e+07	5.76297e+07	6.87079e+07	4.20391e+07	2.79604e+07	4.78732e+07	4.44207e+07	2.63408e+07	4.79145e+07	3.39893e+07	2.67269e+07	9	9	9	9	9	8	9	8	7	High	High	High	High	High	High	High
AN2980-T-p1	transcript=AN2980-T | gene=AN2980 | organism=Aspergillus_nidulans_FGSC_A4 | gene_product=Ortholog(s) have structural constituent of ribosome activity, role in cytoplasmic translation and cytosolic large ribosomal subunit, nucleolus localization | transcript_product=Ortholog(s) have structural constituent of ribosome activity, role in cytoplasmic translation and cytosolic large ribosomal subunit, …	42	422	5	5	0	109	12.3	11.22	3947	33151.6	311	0	45.688		4.7456e+08	3.28449e+08	3.74031e+08	2.79348e+08	1.87195e+08	2.20941e+08	2.99364e+08	3.35712e+08	1.38798e+08	4.7456e+08	3.01535e+08	2.5241e+08	1.52497e+08	7.71149e+07	9.41199e+07	1.7e+08	1.83109e+08	6.43701e+07	5	3	3	4	4	4	4	4	3	High	High	High	High	High	High	High
AN6591-T-p1	transcript=AN6591-T | gene=AN6591 | organism=Aspergillus_nidulans_FGSC_A4 | gene_product=Essential nuclear export receptor | transcript_product=Essential nuclear export receptor | location=ChrI_A_nidulans_FGSC_A4:2563238-2566520(+) | protein_length=961 | sequence_SO=chromosome | SO=protein_coding | is_pseudo=false	21	421	19	19	0	961	108.4	5.43	2093	26290.3	255.89	0	82.864		8.31262e+07	7.49247e+07	8.56007e+07	1.30272e+08	7.07521e+07	3.18711e+08	3.36489e+08	1.61405e+08	7.59596e+07	8.31262e+07	6.87852e+07	5.77666e+07	7.11161e+07	2.91463e+07	1.35769e+08	1.91082e+08	8.80362e+07	3.52277e+07	11	14	16	16	14	14	15	17	14	High	High	High	High	High	High	High
AN10229-T-p1	transcript=AN10229-T | gene=AN10229 | organism=Aspergillus_nidulans_FGSC_A4 | gene_product=Ortholog(s) have role in ascospore formation, mitochondrial respiratory chain complex I assembly, programmed cell death and mitochondrion, plasma membrane localization | transcript_product=Ortholog(s) have role in ascospore formation, mitochondrial respiratory chain complex I assembly, programmed cell death…	28	419	8	8	0	290	32.8	8.47	4644	35936.2	395.26	0	74.809		1.15451e+08	8.80216e+07	6.00946e+07	7.38967e+07	7.58037e+07	7.23181e+07	9.16076e+07	1.02796e+08	3.45171e+08	1.15451e+08	8.08088e+07	4.05541e+07	4.03404e+07	3.12273e+07	3.08072e+07	5.20212e+07	5.60687e+07	1.6008e+08	8	8	6	8	6	6	5	6	6	High	High	High	High	High	High	High
AN4171-T-p1	transcript=AN4171-T | gene=AN4171 | organism=Aspergillus_nidulans_FGSC_A4 | gene_product=Ortholog(s) have role in TOR signaling, actin filament bundle assembly, eisosome assembly, endosomal transport and establishment of protein localization to plasma membrane, more | transcript_product=Ortholog(s) have role in TOR signaling, actin filament bundle assembly, eisosome assembly, endosomal transport …	18	418	7	7	0	521	56.6	8	4753	35335.5	375.55	0	39.688		1.58912e+07	1.55826e+07	3.0911e+07	3.31781e+07	3.4651e+07	2.87341e+07	3.13352e+07	4.75505e+07	7.49007e+07	1.58912e+07	1.43057e+07	2.08599e+07	1.8112e+07	1.42745e+07	1.22406e+07	1.77943e+07	2.59357e+07	3.47366e+07	6	7	7	7	6	6	5	6	6	High	High	High	High	High	High	High
AN4820-T-p1	transcript=AN4820-T | gene=AN4820 | organism=Aspergillus_nidulans_FGSC_A4 | gene_product=Putative succinate-semialdehyde dehydrogenase [NAD(P)+] with a predicted role in 4-aminobutyrate (GABA) shunt | transcript_product=Putative succinate-semialdehyde dehydrogenase [NAD(P)+] with a predicted role in 4-aminobutyrate (GABA) shunt | location=ChrIII_A_nidulans_FGSC_A4:889307-890909(+) | protein_lengt…	27	417	12	12	0	499	54.3	6.64	3501	31647.6	347.82	0	73.115		1.70405e+08	1.36091e+08	2.03299e+08	1.51108e+08	1.51272e+08	2.41936e+08	2.41239e+08	1.62405e+08	2.9067e+08	1.70405e+08	1.24939e+08	1.37194e+08	8.24903e+07	6.23164e+07	1.03063e+08	1.36992e+08	8.85815e+07	1.34804e+08	11	11	11	11	10	11	11	9	9	High	High	High	High	High	High	High
AN8810-T-p1	transcript=AN8810-T | gene=AN8810 | organism=Aspergillus_nidulans_FGSC_A4 | gene_product=Ortholog(s) have endoplasmic reticulum localization | transcript_product=Ortholog(s) have endoplasmic reticulum localization | location=ChrIII_A_nidulans_FGSC_A4:2743442-2745322(-) | protein_length=556 | sequence_SO=chromosome | SO=protein_coding | is_pseudo=false	17	416	9	9	0	556	60.4	6.1	2942	26972.4	224.85	0	39.978		3.4481e+07	1.18699e+07	3.62192e+07	4.06792e+07	3.81743e+07	2.62243e+07	2.28186e+07	3.0591e+07	3.51307e+07	3.4481e+07	1.08972e+07	2.44421e+07	2.22069e+07	1.57259e+07	1.11714e+07	1.2958e+07	1.66854e+07	1.62926e+07	7	7	6	9	6	7	7	8	7	High	High	High	High	High	High	High
AN2862-T-p1	transcript=AN2862-T | gene=AN2862 | organism=Aspergillus_nidulans_FGSC_A4 | gene_product=Predicted CAP-Gly domain protein with similarity to Saccharomyces cerevisiae Bim1p | transcript_product=Predicted CAP-Gly domain protein with similarity to Saccharomyces cerevisiae Bim1p | location=ChrVI_A_nidulans_FGSC_A4:2575753-2576850(-) | protein_length=246 | sequence_SO=chromosome | SO=protein_coding | …	49	415	10	10	0	246	27.1	5.07	2142	28795.8	295.3	0	56.075		2.49873e+07	3.49045e+07	5.60639e+07	4.77564e+07	6.53401e+07	4.85883e+07	4.45825e+07	4.27063e+07	5.76607e+07	2.49873e+07	3.20443e+07	3.78341e+07	2.60704e+07	2.69168e+07	2.06984e+07	2.5317e+07	2.32935e+07	2.67413e+07	7	7	6	7	8	8	8	6	9	High	High	High	High	High	High	High
AN0445-T-p1	transcript=AN0445-T | gene=AN0445 | organism=Aspergillus_nidulans_FGSC_A4 | gene_product=Ortholog(s) have RNA binding, structural constituent of ribosome activity, role in cytoplasmic translation and cytosolic large ribosomal subunit, nucleolus localization | transcript_product=Ortholog(s) have RNA binding, structural constituent of ribosome activity, role in cytoplasmic translation and cytosolic…	46	414	11	11	0	203	24	11.31	2648	27116.2	287.88	0	42.669		2.25029e+08	5.44344e+08	6.50736e+08	6.07933e+08	5.76027e+08	6.71091e+08	6.24618e+08	8.70886e+08	8.16331e+08	2.25029e+08	4.99739e+08	4.39141e+08	3.31872e+08	2.37294e+08	2.85881e+08	3.54702e+08	4.75012e+08	3.78589e+08	9	9	8	10	9	10	10	9	10	High	High	High	High	High	High	High
AN7177-T-p1	transcript=AN7177-T | gene=AN7177 | organism=Aspergillus_nidulans_FGSC_A4 | gene_product=Ortholog of A. fumigatus Af293 : Afu4g03322, A. niger CBS 513.88 : An14g01990, A. oryzae RIB40 : AO090011000139, Aspergillus sydowii : Aspsy1_0052594 and Aspergillus terreus NIH2624 : ATET_02136 | transcript_product=Ortholog of A. fumigatus Af293 : Afu4g03322, A. niger CBS 513.88 : An14g01990, A. oryzae RIB40…	35	414	4	4	0	231	25.9	4.79	2550	32290.3	332.85	0	32.32		5.50232e+07	4.69647e+07	5.91168e+07	9.03282e+07	4.67074e+07	4.59445e+07	2.66712e+07	5.85716e+07	2.99246e+07	5.50232e+07	4.31163e+07	3.98943e+07	4.93104e+07	1.92411e+07	1.95721e+07	1.51458e+07	3.1947e+07	1.38781e+07	3	4	3	3	3	2	3	2	3	High	High	High	High	High	High	High
AN10130-T-p1	transcript=AN10130-T | gene=AN10130 | organism=Aspergillus_nidulans_FGSC_A4 | gene_product=Ortholog(s) have structural constituent of ribosome activity and cytosolic small ribosomal subunit localization | transcript_product=Ortholog(s) have structural constituent of ribosome activity and cytosolic small ribosomal subunit localization | location=ChrVIII_A_nidulans_FGSC_A4:1957246-1957809(+) | prot…	38	412	5	5	0	92	10.2	10.18	2328	28249.4	252.32	0	23.928		8.75191e+08	1.47035e+09	7.12934e+08	8.22031e+08	7.53265e+08	6.95474e+08	8.30168e+08	5.48402e+08	4.43126e+08	8.75191e+08	1.34986e+09	4.81115e+08	4.48749e+08	3.10307e+08	2.96268e+08	4.71427e+08	2.99118e+08	2.05508e+08	5	5	5	5	5	5	5	4	5	High	High	High	High	High	High	High
AN2332-T-p1	transcript=AN2332-T | gene=AN2332 | organism=Aspergillus_nidulans_FGSC_A4 | gene_product=Putative succinate dehydrogenase with a predicted role in the TCA cycle | transcript_product=Putative succinate dehydrogenase with a predicted role in the TCA cycle | location=ChrVII_A_nidulans_FGSC_A4:3585765-3586749(+) | protein_length=273 | sequence_SO=chromosome | SO=protein_coding | is_pseudo=false	32	408	9	9	0	273	31.3	8.84	2315	26259.6	226.17	0	58.289		6.62222e+07	8.84156e+07	9.58393e+07	6.44264e+07	1.23924e+08	1.13783e+08	1.30014e+08	1.23982e+08	1.61774e+08	6.62222e+07	8.11705e+07	6.4676e+07	3.51706e+07	5.10503e+07	4.84709e+07	7.38312e+07	6.76241e+07	7.50258e+07	9	7	9	9	8	7	8	9	8	High	High	High	High	High	High	High
AN6630-T-p1	transcript=AN6630-T | gene=AN6630 | organism=Aspergillus_nidulans_FGSC_A4 | gene_product=Putative nascent polypeptide-associated complex subunit alpha | transcript_product=Putative nascent polypeptide-associated complex subunit alpha | location=ChrI_A_nidulans_FGSC_A4:2679580-2680339(+) | protein_length=203 | sequence_SO=chromosome | SO=protein_coding | is_pseudo=false	28	408	4	4	0	203	22	4.94	3598	37940.1	363.35	0	42.726		3.24659e+07	6.22011e+07	8.40363e+07	5.02186e+07	3.34879e+07	3.54652e+07	3.39496e+07	3.83694e+07	5.17526e+07	3.24659e+07	5.71042e+07	5.67109e+07	2.74145e+07	1.37953e+07	1.5108e+07	1.92789e+07	2.0928e+07	2.40013e+07	4	4	4	3	4	4	4	4	3	High	High	High	High	High	High	High
AN5162-T-p1	transcript=AN5162-T | gene=AN5162 | organism=Aspergillus_nidulans_FGSC_A4 | gene_product=Putative pyruvate dehydrogenase (lipoamide) with a predicted role in pyruvate metabolism | transcript_product=Putative pyruvate dehydrogenase (lipoamide) with a predicted role in pyruvate metabolism | location=ChrV_A_nidulans_FGSC_A4:1346399-1347806(+) | protein_length=405 | sequence_SO=chromosome | SO=protei…	28	408	14	14	0	405	45.5	8.15	1882	21089.3	206.7	0	59.787		2.18628e+08	5.80754e+07	5.1107e+07	1.12232e+08	1.25057e+08	1.31935e+08	6.38755e+07	1.01795e+08	7.86264e+07	2.18628e+08	5.33165e+07	3.44889e+07	6.12678e+07	5.15173e+07	5.62035e+07	3.62729e+07	5.55225e+07	3.64645e+07	12	9	11	12	14	12	13	10	7	High	High	High	High	High	High	High
AN0162-T-p1	transcript=AN0162-T | gene=AN0162 | organism=Aspergillus_nidulans_FGSC_A4 | gene_product=Has domain(s) with predicted DNA binding, transcription factor activity, sequence-specific DNA binding activity and role in regulation of transcription, DNA-templated | transcript_product=Has domain(s) with predicted DNA binding, transcription factor activity, sequence-specific DNA binding activity and role i…	25	408	9	9	0	424	46.8	6.87	4526	37935.5	364.93	0	94.232		2.1748e+07	3.86559e+07	4.96082e+07	4.0581e+07	4.69729e+07	7.03647e+07	3.07449e+07	3.37411e+07	4.42324e+07	2.1748e+07	3.54883e+07	3.34775e+07	2.21533e+07	1.93505e+07	2.9975e+07	1.74591e+07	1.84036e+07	2.05136e+07	6	9	9	9	9	7	8	8	7	High	High	High	High	High	High	High
AN4470-T-p1	transcript=AN4470-T | gene=AN4470 | organism=Aspergillus_nidulans_FGSC_A4 | gene_product=Ortholog(s) have GTP binding, tRNA binding, translation initiation factor activity, translation initiation factor binding activity | transcript_product=Ortholog(s) have GTP binding, tRNA binding, translation initiation factor activity, translation initiation factor binding activity | location=ChrIII_A_nidulan…	25	407	9	9	0	514	56	7.47	2264	27577.2	271.29	0	55.304		4.0553e+07	7.59006e+07	8.00781e+07	3.87123e+07	3.24453e+07	2.85819e+07	5.46068e+07	4.40667e+07	5.84028e+07	4.0553e+07	6.96811e+07	5.40397e+07	2.11331e+07	1.33658e+07	1.21757e+07	3.10095e+07	2.40355e+07	2.70854e+07	6	6	5	5	6	5	6	6	5	High	High	High	High	High	High	High
AN4159-T-p1	transcript=AN4159-T | gene=AN4159 | organism=Aspergillus_nidulans_FGSC_A4 | gene_product=Putative glutamate-ammonia ligase with a predicted role in glutamate and glutamine metabolism | transcript_product=Putative glutamate-ammonia ligase with a predicted role in glutamate and glutamine metabolism | location=ChrII_A_nidulans_FGSC_A4:1916201-1917578(+) | protein_length=358 | sequence_SO=chromosome …	18	407	6	6	0	358	39.9	6.07	1909	22918.9	158.99	0	33.566		1.07115e+09	4.13769e+08	2.00593e+08	4.60211e+08	1.64646e+08	1.50935e+08	3.38791e+08	7.18339e+07	1.18507e+08	1.07115e+09	3.79863e+08	1.35368e+08	2.5123e+08	6.78258e+07	6.42976e+07	1.92389e+08	3.91807e+07	5.49597e+07	5	4	6	5	4	5	5	5	5	High	High	High	High	High	High	High
AN8770-T-p1	transcript=AN8770-T | gene=AN8770 | organism=Aspergillus_nidulans_FGSC_A4 | gene_product=Putative bifunctional enzyme with a predicted role in arginine metabolism | transcript_product=Putative bifunctional enzyme with a predicted role in arginine metabolism | location=ChrIII_A_nidulans_FGSC_A4:2873327-2876101(-) | protein_length=905 | sequence_SO=chromosome | SO=protein_coding | is_pseudo=false	23	406	18	18	0	905	99.1	8.12	2262	27833	272.73	0	123.894		1.10955e+08	5.52161e+07	8.89057e+07	7.00793e+07	6.46583e+07	7.34536e+07	1.02163e+08	8.91003e+07	3.99239e+07	1.10955e+08	5.06915e+07	5.9997e+07	3.82565e+07	2.6636e+07	3.12908e+07	5.80155e+07	4.85984e+07	1.85155e+07	14	14	14	13	13	14	12	11	10	High	High	High	High	High	High	High
AN4825-T-p1	transcript=AN4825-T | gene=AN4825 | organism=Aspergillus_nidulans_FGSC_A4 | gene_product=Putative glucan 1,3-beta-glucosidase with a predicted role in glucan metabolism | transcript_product=Putative glucan 1,3-beta-glucosidase with a predicted role in glucan metabolism | location=ChrIII_A_nidulans_FGSC_A4:864632-868002(+) | protein_length=900 | sequence_SO=chromosome | SO=protein_coding | is_pseu…	17	405	13	13	0	900	96.5	5.53	3705	30722	297.57	0	75.693		5.67544e+07	6.18951e+07	1.36801e+08	7.23633e+07	1.14741e+08	8.77702e+07	9.04294e+07	4.38122e+07	6.01437e+07	5.67544e+07	5.68232e+07	9.23189e+07	3.95033e+07	4.72675e+07	3.73897e+07	5.13521e+07	2.38967e+07	2.78928e+07	10	11	10	10	10	10	10	8	11	High	High	High	High	High	High	High
AN1408-T-p1	transcript=AN1408-T | gene=AN1408 | organism=Aspergillus_nidulans_FGSC_A4 | gene_product=Putative U5 snRNP-specific protein | transcript_product=Putative U5 snRNP-specific protein | location=ChrVII_A_nidulans_FGSC_A4:692690-695815(-) | protein_length=985 | sequence_SO=chromosome | SO=protein_coding | is_pseudo=false	10	405	9	8	0	985	109.8	5.21	1340	19379.9	253.27	0	31.014		5.5637e+06	5.05532e+06	1.06976e+07	1.30574e+07	9.09167e+06	8.02236e+06	1.03147e+07	1.33883e+07	8.74557e+06	5.5637e+06	4.64108e+06	7.21915e+06	7.12809e+06	3.74531e+06	3.41748e+06	5.85743e+06	7.30243e+06	4.05593e+06	3	3	5	6	5	4	6	5	3	High	Peak Found	High	High	High	High	High
AN1899-T-p1	transcript=AN1899-T | gene=AN1899 | organism=Aspergillus_nidulans_FGSC_A4 | gene_product=Putative 4-hydroxyphenylpyruvate dioxygenase with a predicted role in aromatic amino acid biosynthesis | transcript_product=Putative 4-hydroxyphenylpyruvate dioxygenase with a predicted role in aromatic amino acid biosynthesis | location=ChrVII_A_nidulans_FGSC_A4:2188146-2189519(+) | protein_length=401 | sequ…	28	405	11	11	0	401	45.3	6	2875	29430.4	299.34	0	61.395		1.25275e+08	1.33191e+08	1.56506e+08	1.58635e+08	2.02497e+08	1.83826e+08	2.34205e+08	5.49613e+07	4.22293e+07	1.25275e+08	1.22277e+08	1.05616e+08	8.65994e+07	8.34186e+07	7.8309e+07	1.32998e+08	2.99778e+07	1.95847e+07	10	11	9	10	9	10	7	9	6	High	High	High	High	High	High	High
AN9080-T-p1	transcript=AN9080-T | gene=AN9080 | organism=Aspergillus_nidulans_FGSC_A4 | gene_product=Ortholog(s) have cytosol, mitochondrial intermembrane space, nucleus localization | transcript_product=Ortholog(s) have cytosol, mitochondrial intermembrane space, nucleus localization | location=ChrVI_A_nidulans_FGSC_A4:495533-496293(+) | protein_length=161 | sequence_SO=chromosome | SO=protein_coding | is_p…	40	405	5	5	0	161	17.5	8.84	5168	35459.8	352.14	0	43.412		2.83604e+08	1.33201e+08	1.65753e+08	1.56718e+08	1.89967e+08	1.43828e+08	1.49514e+08	1.21485e+08	1.30015e+08	2.83604e+08	1.22286e+08	1.11856e+08	8.55529e+07	7.82569e+07	6.127e+07	8.49047e+07	6.62619e+07	6.02968e+07	5	4	5	4	5	4	5	5	5	High	High	High	High	High	High	High
AN2977-T-p1	transcript=AN2977-T | gene=AN2977 | organism=Aspergillus_nidulans_FGSC_A4 | gene_product=Putative transporter with a predicted role in small molecule transport | transcript_product=Putative transporter with a predicted role in small molecule transport | location=ChrVI_A_nidulans_FGSC_A4:2195793-2197208(-) | protein_length=376 | sequence_SO=chromosome | SO=protein_coding | is_pseudo=false	24	405	9	9	0	376	41.1	9.38	1982	24829	284.83	0	40.016		1.04399e+08	7.7931e+07	7.72477e+07	1.01519e+08	1.68368e+08	2.61468e+08	1.78722e+08	1.68534e+08	1.3976e+08	1.04399e+08	7.15451e+07	5.21297e+07	5.54195e+07	6.93591e+07	1.11384e+08	1.01491e+08	9.19243e+07	6.48166e+07	9	7	8	9	9	9	8	8	7	High	High	High	High	High	High	High
AN5206-T-p1	transcript=AN5206-T | gene=AN5206 | organism=Aspergillus_nidulans_FGSC_A4 | gene_product=Putative homoisocitrate dehydrogenase with a predicted role in lysine metabolism | transcript_product=Putative homoisocitrate dehydrogenase with a predicted role in lysine metabolism | location=ChrV_A_nidulans_FGSC_A4:1483680-1484947(+) | protein_length=360 | sequence_SO=chromosome | SO=protein_coding | is_ps…	36	401	12	11	1	360	38.3	5.9	3165	29241.5	323.17	0	58.979		3.7159e+07	5.30035e+07	3.12306e+07	1.03034e+08	1.36427e+08	1.11518e+08	8.19933e+07	8.59716e+07	1.16646e+08	3.7159e+07	4.86602e+07	2.10756e+07	5.62466e+07	5.6201e+07	4.75062e+07	4.65615e+07	4.68919e+07	5.40966e+07	9	9	8	9	9	10	7	9	9	High	High	High	High	High	High	High
AN5904-T-p1	transcript=AN5904-T | gene=AN5904 | organism=Aspergillus_nidulans_FGSC_A4 | gene_product=Putative beta-ketoacyl-[acyl-carrier-protein] synthase with a predicted role in cytosolic fatty acid formation | transcript_product=Putative beta-ketoacyl-[acyl-carrier-protein] synthase with a predicted role in cytosolic fatty acid formation | location=ChrI_A_nidulans_FGSC_A4:1851777-1852362(+) | protein_len…	65	400	6	6	0	144	15.6	5.34	5493	42792.8	418.07	0	53.321		2.12636e+08	1.50472e+08	5.15475e+07	9.84051e+07	1.13531e+08	1.12828e+08	7.74771e+07	5.46111e+07	1.50662e+08	2.12636e+08	1.38142e+08	3.47862e+07	5.37196e+07	4.67691e+07	4.80641e+07	4.39969e+07	2.97868e+07	6.98724e+07	5	6	5	6	6	6	6	5	6	High	High	High	High	High	High	High
AN0465-T-p1	transcript=AN0465-T | gene=AN0465 | organism=Aspergillus_nidulans_FGSC_A4 | gene_product=Ortholog of S. cerevisiae RPS8A and RPS8B | transcript_product=Ortholog of S. cerevisiae RPS8A and RPS8B | location=ChrVIII_A_nidulans_FGSC_A4:3470982-3471645(+) | protein_length=201 | sequence_SO=chromosome | SO=protein_coding | is_pseudo=false	39	399	6	6	0	201	22.8	11.15	5348	33164.8	362.04	0	38.551		8.26743e+07	7.1885e+07	7.97551e+07	1.46734e+08	1.74119e+08	2.38615e+08	1.33701e+08	1.86559e+08	3.42964e+08	8.26743e+07	6.59945e+07	5.38218e+07	8.01024e+07	7.17283e+07	1.01649e+08	7.59247e+07	1.01756e+08	1.59056e+08	6	5	6	5	6	5	4	6	4	High	High	High	High	High	High	High
AN5580-T-p1	transcript=AN5580-T | gene=AN5580 | organism=Aspergillus_nidulans_FGSC_A4 | gene_product=Ortholog of A. fumigatus Af293 : Afu4g11550, A. niger CBS 513.88 : An04g04940, Aspergillus wentii : Aspwe1_0022740, Aspergillus sydowii : Aspsy1_0057110 and Aspergillus terreus NIH2624 : ATET_03924 | transcript_product=Ortholog of A. fumigatus Af293 : Afu4g11550, A. niger CBS 513.88 : An04g04940, Aspergillus …	9	399	3	3	0	309	33.3	9.04	1383	22467.9	197.27	0	11.638		2.61601e+08	1.04827e+08	1.16064e+08	1.71295e+08	1.39893e+08	2.12738e+08	9.91634e+07	1.47026e+08	1.4085e+08	2.61601e+08	9.62369e+07	7.83247e+07	9.35103e+07	5.7629e+07	9.06254e+07	5.63119e+07	8.01931e+07	6.53221e+07	3	3	3	3	3	3	3	3	3	High	High	High	High	High	High	High
AN8851-T-p1	transcript=AN8851-T | gene=AN8851 | organism=Aspergillus_nidulans_FGSC_A4 | gene_product=Predicted pseudouridylate synthase, involved in establishment of cell polarity | transcript_product=Predicted pseudouridylate synthase, involved in establishment of cell polarity | location=ChrIII_A_nidulans_FGSC_A4:2598217-2599925(+) | protein_length=481 | sequence_SO=chromosome | SO=protein_coding | is_pseu…	22	397	12	12	0	481	54.2	8.72	1954	25757	202.93	0	74.584		4.94294e+07	6.16592e+07	5.98245e+07	5.49768e+07	6.97099e+07	6.75497e+07	4.71462e+07	4.20618e+07	2.44565e+07	4.94294e+07	5.66067e+07	4.03719e+07	3.0012e+07	2.8717e+07	2.87758e+07	2.67729e+07	2.2942e+07	1.13422e+07	9	10	9	9	10	8	8	8	8	High	High	High	High	High	High	High
AN12485-T-p1	transcript=AN12485-T | gene=AN12485 | organism=Aspergillus_nidulans_FGSC_A4 | gene_product=Ortholog(s) have mitochondrial outer membrane, plasma membrane, prospore membrane localization | transcript_product=Ortholog(s) have mitochondrial outer membrane, plasma membrane, prospore membrane localization | location=ChrVIII_A_nidulans_FGSC_A4:715104-717404(-) | protein_length=720 | sequence_SO=chromos…	30	397	20	20	0	720	80.2	7.14	1836	24185.5	253.76	0	108.83		5.517e+08	1.00762e+08	1.14403e+08	2.11437e+08	1.22446e+08	4.06889e+08	4.49821e+08	2.9153e+08	1.2633e+08	5.517e+08	9.25053e+07	7.72034e+07	1.15424e+08	5.04418e+07	1.73332e+08	2.5544e+08	1.5901e+08	5.85881e+07	14	15	13	15	15	16	14	15	17	High	High	High	High	High	High	High
AN2458-T-p1	transcript=AN2458-T | gene=AN2458 | organism=Aspergillus_nidulans_FGSC_A4 | gene_product=C-terminal subunit of Cand1 | transcript_product=C-terminal subunit of Cand1 | location=ChrVII_A_nidulans_FGSC_A4:3999233-4002486(+) | protein_length=1041 | sequence_SO=chromosome | SO=protein_coding | is_pseudo=false	24	397	23	23	0	1041	113.4	5.19	1390	24058.7	231.21	0	111.454		6.96603e+07	4.77416e+07	4.74321e+07	8.73288e+07	6.56546e+07	5.2009e+07	5.12984e+07	5.59653e+07	4.46402e+07	6.96603e+07	4.38295e+07	3.2009e+07	4.7673e+07	2.70464e+07	2.21556e+07	2.91308e+07	3.05255e+07	2.07028e+07	18	17	15	16	16	16	18	15	13	High	High	High	High	High	High	High
AN5812-T-p1	transcript=AN5812-T | gene=AN5812 | organism=Aspergillus_nidulans_FGSC_A4 | gene_product=Ortholog(s) have aminopeptidase activity, epoxide hydrolase activity, role in cellular lipid metabolic process, protein catabolic process and cytosol, nucleus localization | transcript_product=Ortholog(s) have aminopeptidase activity, epoxide hydrolase activity, role in cellular lipid metabolic process, prote…	16	397	11	11	0	650	73.8	6.47	2244	26106.8	240.07	0	61.773		5.15295e+07	4.5895e+07	1.25815e+08	1.24415e+08	3.97377e+07	1.83885e+07	3.59624e+07	4.70463e+07	3.81453e+08	5.15295e+07	4.21342e+07	8.49049e+07	6.79187e+07	1.63699e+07	7.83339e+06	2.0422e+07	2.56607e+07	1.76906e+08	10	7	6	10	7	7	7	8	8	High	High	High	High	High	High	High
AN8514-T-p1	transcript=AN8514-T | gene=AN8514 | organism=Aspergillus_nidulans_FGSC_A4 | gene_product=Asterriquinone prenyltransferase | transcript_product=Asterriquinone prenyltransferase | location=ChrV_A_nidulans_FGSC_A4:739015-740407(+) | protein_length=419 | sequence_SO=chromosome | SO=protein_coding | is_pseudo=false	24	394	8	8	0	419	46	5.2	2463	25815	261.16	0	56.374		4.58642e+07	3.05867e+07	8.30282e+07	3.17421e+07	3.56017e+07	4.556e+07	3.8933e+07	5.22975e+07	5.35691e+07	4.58642e+07	2.80803e+07	5.60306e+07	1.73281e+07	1.46661e+07	1.94083e+07	2.21089e+07	2.85249e+07	2.48437e+07	6	6	6	6	7	6	6	7	6	High	High	High	High	High	High	High
AN3708-T-p1	transcript=AN3708-T | gene=AN3708 | organism=Aspergillus_nidulans_FGSC_A4 | gene_product=Ortholog(s) have hydrolase activity, role in nucleotide metabolic process and cytosol, nucleus localization | transcript_product=Ortholog(s) have hydrolase activity, role in nucleotide metabolic process and cytosol, nucleus localization | location=ChrII_A_nidulans_FGSC_A4:3317757-3318671(-) | protein_length=1…	65	393	5	5	0	133	14.9	6.87	612	27109.3	239.57	0	39.379		2.87162e+07	7.06589e+07	7.27421e+07	7.19747e+07	4.98747e+07	6.49026e+07	5.86772e+07	5.67199e+07	4.75116e+07	2.87162e+07	6.48689e+07	4.90892e+07	3.92912e+07	2.05459e+07	2.76482e+07	3.3321e+07	3.0937e+07	2.20344e+07	3	3	5	5	4	3	5	3	4	High	High	High	High	High	High	High
AN4038-T-p1	transcript=AN4038-T | gene=AN4038 | organism=Aspergillus_nidulans_FGSC_A4 | gene_product=Putative translation initiation factor eIF5B | transcript_product=Putative translation initiation factor eIF5B | location=ChrII_A_nidulans_FGSC_A4:2267742-2271077(-) | protein_length=1072 | sequence_SO=chromosome | SO=protein_coding | is_pseudo=false	17	391	18	18	0	1072	118.8	5.74	1892	31292.9	346.13	0	89.312		4.529e+07	2.26997e+07	2.10975e+07	8.22657e+07	4.64856e+07	2.52134e+07	8.10412e+07	2.37103e+07	3.4163e+07	4.529e+07	2.08396e+07	1.42374e+07	4.49091e+07	1.91497e+07	1.07408e+07	4.60208e+07	1.29325e+07	1.58437e+07	9	7	8	10	8	8	9	6	9	High	High	High	High	High	High	High
AN2149-T-p1	transcript=AN2149-T | gene=AN2149 | organism=Aspergillus_nidulans_FGSC_A4 | gene_product=Putative chaperonin complex component, TCP-1 alpha subunit | transcript_product=Putative chaperonin complex component, TCP-1 alpha subunit | location=ChrVII_A_nidulans_FGSC_A4:3034514-3036509(-) | protein_length=568 | sequence_SO=chromosome | SO=protein_coding | is_pseudo=false	27	391	14	14	0	568	61.9	6.84	1683	25327	256.6	0	57.926		2.74921e+08	1.9872e+08	6.35398e+07	4.13963e+08	8.4461e+07	1.14878e+08	1.40207e+08	5.61365e+07	8.92608e+07	2.74921e+08	1.82436e+08	4.28791e+07	2.25983e+08	3.47937e+07	4.89374e+07	7.96191e+07	3.06188e+07	4.13964e+07	12	11	11	13	11	11	11	8	12	High	High	High	High	High	High	High
AN0163-T-p1	transcript=AN0163-T | gene=AN0163 | organism=Aspergillus_nidulans_FGSC_A4 | gene_product=Ortholog(s) have Rho GDP-dissociation inhibitor activity | transcript_product=Ortholog(s) have Rho GDP-dissociation inhibitor activity | location=ChrVIII_A_nidulans_FGSC_A4:4405758-4406679(-) | protein_length=197 | sequence_SO=chromosome | SO=protein_coding | is_pseudo=false	58	390	8	8	0	197	22.3	6.18	2118	27576.6	229.54	0	62.773		6.48107e+06	2.35501e+07	3.27292e+07	5.24527e+07	6.14793e+07	6.15984e+07	5.76573e+07	4.38453e+07	6.2318e+07	6.48107e+06	2.16203e+07	2.20869e+07	2.86341e+07	2.53264e+07	2.62406e+07	32741820	2.39148e+07	2.89012e+07	6	5	6	6	4	7	6	6	6	High	High	High	High	High	High	High
AN2918-T-p1	transcript=AN2918-T | gene=AN2918 | organism=Aspergillus_nidulans_FGSC_A4 | gene_product=Putative chaperonin complex component, TCP-1 delta subunit | transcript_product=Putative chaperonin complex component, TCP-1 delta subunit | location=ChrVI_A_nidulans_FGSC_A4:2400777-2402366(-) | protein_length=495 | sequence_SO=chromosome | SO=protein_coding | is_pseudo=false	29	389	10	10	0	495	53.6	7.49	2985	33421.2	375.59	0	75.068		1.07568e+07	3.85518e+07	3.30302e+07	5.59107e+07	3.85858e+07	4.55231e+07	5.50023e+07	7.06933e+07	8.12467e+07	1.07568e+07	3.53927e+07	2.22901e+07	3.05218e+07	1.58954e+07	1.93926e+07	3.12341e+07	3.85586e+07	3.76797e+07	8	9	7	8	10	9	9	10	8	High	High	High	High	High	High	High
AN7181-T-p1	transcript=AN7181-T | gene=AN7181 | organism=Aspergillus_nidulans_FGSC_A4 | gene_product=Ortholog of A. fumigatus Af293 : Afu4g03200, A. oryzae RIB40 : AO090011000112, Neosartorya fischeri NRRL 181 : NFIA_030260 and Aspergillus versicolor : Aspve1_0140969 | transcript_product=Ortholog of A. fumigatus Af293 : Afu4g03200, A. oryzae RIB40 : AO090011000112, Neosartorya fischeri NRRL 181 : NFIA_030260…	33	389	11	11	0	452	49.1	4.88	4931	34191.1	344	0	69.669		2.06455e+08	1.30607e+08	7.73991e+07	1.45283e+08	1.49124e+08	1.43227e+08	1.85809e+08	6.06203e+07	3.81789e+07	2.06455e+08	1.19905e+08	5.22318e+07	7.93103e+07	6.14317e+07	6.10138e+07	1.05515e+08	3.30644e+07	1.77062e+07	7	8	8	8	8	7	8	9	7	High	High	High	High	High	High	High
AN0410-T-p1	transcript=AN0410-T | gene=AN0410 | organism=Aspergillus_nidulans_FGSC_A4 | gene_product=Essential protein phosphatase required for the completion of anaphase | transcript_product=Essential protein phosphatase required for the completion of anaphase | location=ChrVIII_A_nidulans_FGSC_A4:3641938-3643225(-) | protein_length=323 | sequence_SO=chromosome | SO=protein_coding | is_pseudo=false	33	389	9	9	0	323	37.2	5.78	2467	30952.9	309.29	0	56.031	Acetyl [N-Term]	4.72169e+07	4.68561e+07	5.53368e+07	6.19283e+07	1.26336e+08	1.0252e+08	7.63168e+07	7.41937e+07	8.6008e+07	4.72169e+07	4.30166e+07	3.73434e+07	3.38069e+07	5.20443e+07	4.3673e+07	4.3338e+07	4.04679e+07	3.98879e+07	8	6	6	8	8	8	7	7	5	High	High	High	High	High	High	High
AN5861-T-p1	transcript=AN5861-T | gene=AN5861 | organism=Aspergillus_nidulans_FGSC_A4 | gene_product=Ortholog(s) have ketoreductase activity, role in fatty acid elongation, sphingolipid biosynthetic process, very long-chain fatty acid biosynthetic process and endoplasmic reticulum membrane localization | transcript_product=Ortholog(s) have ketoreductase activity, role in fatty acid elongation, sphingolipid b…	25	388	9	9	0	346	37.7	9.7	2956	26498.8	321.1	0	36.102		1.08077e+08	4.01758e+07	1.07754e+08	8.27245e+07	1.48819e+08	1.10843e+08	1.37053e+08	1.05731e+08	1.35908e+08	1.08077e+08	3.68837e+07	7.27165e+07	4.51595e+07	6.13058e+07	4.72185e+07	7.7828e+07	5.76693e+07	6.30299e+07	7	7	9	8	7	8	8	8	7	High	High	High	High	High	High	High
AN3756-T-p1	transcript=AN3756-T | gene=AN3756 | organism=Aspergillus_nidulans_FGSC_A4 | gene_product=Ortholog(s) have endopeptidase activity and role in proteasomal ubiquitin-independent protein catabolic process, proteasome-mediated ubiquitin-dependent protein catabolic process | transcript_product=Ortholog(s) have endopeptidase activity and role in proteasomal ubiquitin-independent protein catabolic proces…	31	387	6	6	0	233	25.1	5.92	3450	26582.9	318.56	0	27.019		1.89048e+08	1.7571e+08	1.66105e+08	1.24667e+08	1.67491e+08	1.60353e+08	2.06146e+08	1.56369e+08	1.52973e+08	1.89048e+08	1.61312e+08	1.12094e+08	6.80561e+07	6.89977e+07	6.83096e+07	1.17064e+08	8.52891e+07	7.09441e+07	4	5	5	5	5	6	5	6	5	High	High	High	High	High	High	High
AN10965-T-p1	transcript=AN10965-T | gene=AN10965 | organism=Aspergillus_nidulans_FGSC_A4 | gene_product=Ortholog(s) have cytosol, nucleus localization | transcript_product=Ortholog(s) have cytosol, nucleus localization | location=ChrIV_A_nidulans_FGSC_A4:2120027-2120846(+) | protein_length=161 | sequence_SO=chromosome | SO=protein_coding | is_pseudo=false	64	387	8	8	0	161	18.3	4.89	2218	27097.9	260.43	0	44.709		1.44841e+08	1.18885e+08	4.16256e+07	2.27672e+08	1.95009e+08	2.08265e+08	2.74305e+08	4.5224e+07	3.60829e+07	1.44841e+08	1.09143e+08	2.80905e+07	1.24287e+08	8.03338e+07	8.87197e+07	1.5577e+08	2.46667e+07	1.67341e+07	5	7	5	7	6	7	7	7	7	High	High	High	High	High	High	High
AN6004-T-p1	transcript=AN6004-T | gene=AN6004 | organism=Aspergillus_nidulans_FGSC_A4 | gene_product=actin cytoskeleton protein | transcript_product=actin cytoskeleton protein | location=ChrI_A_nidulans_FGSC_A4:1535202-1536127(-) | protein_length=270 | sequence_SO=chromosome | SO=protein_coding | is_pseudo=false	48	386	10	10	0	270	29	5.91	1992	24697.6	233.39	0	54.222		1.61497e+08	1.93103e+08	2.9883e+08	1.74739e+08	2.2603e+08	2.22475e+08	2.43733e+08	2.52261e+08	3.63668e+08	1.61497e+08	1.77279e+08	2.01662e+08	9.53906e+07	9.3113e+07	9.47732e+07	1.38409e+08	1.37592e+08	1.68658e+08	8	9	9	8	7	8	7	8	9	High	High	High	High	High	High	High
AN8010-T-p1	transcript=AN8010-T | gene=AN8010 | organism=Aspergillus_nidulans_FGSC_A4 | gene_product=Putative glycogen (starch) synthase with a predicted role in glycogen biosynthesis | transcript_product=Putative glycogen (starch) synthase with a predicted role in glycogen biosynthesis | location=ChrII_A_nidulans_FGSC_A4:490027-492309(-) | protein_length=711 | sequence_SO=chromosome | SO=protein_coding | is…	27	386	16	16	0	711	81.1	6.68	1743	25122	223.27	0	90.217		1.37524e+08	6.82719e+07	3.60225e+07	4.9631e+07	1.33518e+08	5.18275e+07	4.05587e+07	3.88489e+07	1.06759e+08	1.37524e+08	6.26775e+07	2.43094e+07	2.70937e+07	5.50027e+07	2.20783e+07	2.3032e+07	2.11895e+07	4.95117e+07	13	13	11	11	11	12	11	12	13	High	High	High	High	High	High	High
AN0034-T-p1	transcript=AN0034-T | gene=AN0034 | organism=Aspergillus_nidulans_FGSC_A4 | gene_product=Putative glycerone kinase with a predicted role in glycerol metabolism | transcript_product=Putative glycerone kinase with a predicted role in glycerol metabolism | location=ChrVIII_A_nidulans_FGSC_A4:4806823-4808836(+) | protein_length=590 | sequence_SO=chromosome | SO=protein_coding | is_pseudo=false	39	385	15	15	0	590	62.5	6.04	1863	27006.9	222.83	0	94.504		101782593	1.40689e+08	1.85001e+08	1.71022e+08	1.34419e+08	1.24098e+08	1.51472e+08	1.03057e+08	1.09421e+08	101782593	1.29161e+08	1.24846e+08	9.33611e+07	5.53737e+07	5.28651e+07	8.60162e+07	5.62111e+07	5.0746e+07	11	12	13	14	12	14	11	10	11	High	High	High	High	High	High	High
AN10734-T-p1	transcript=AN10734-T | gene=AN10734 | organism=Aspergillus_nidulans_FGSC_A4 | gene_product=Ortholog(s) have role in regulation of translational elongation and cytosolic ribosome, mitochondrion localization | transcript_product=Ortholog(s) have role in regulation of translational elongation and cytosolic ribosome, mitochondrion localization | location=ChrI_A_nidulans_FGSC_A4:2068027-2076455(-) | p…	15	381	31	31	0	2672	291.6	5.62	2327	26190.2	253.33	0	144.808		5.34478e+07	7.67426e+07	5.3904e+07	4.62088e+07	1.73375e+08	1.09412e+08	7.9197e+07	5.78659e+07	9.30732e+07	5.34478e+07	7.04541e+07	3.63765e+07	2.52255e+07	7.14217e+07	4.6609e+07	4.49736e+07	3.15621e+07	4.31645e+07	22	20	21	20	21	19	20	23	19	High	High	High	High	High	High	High
AN10474-T-p1	transcript=AN10474-T | gene=AN10474 | organism=Aspergillus_nidulans_FGSC_A4 | gene_product=Has domain(s) with predicted tRNA binding activity | transcript_product=Has domain(s) with predicted tRNA binding activity | location=ChrII_A_nidulans_FGSC_A4:2801567-2802883(+) | protein_length=438 | sequence_SO=chromosome | SO=protein_coding | is_pseudo=false	24	379	7	7	0	438	46.5	7.09	2693	37815.2	420.96	0	47.707		5.59905e+07	1.83507e+07	2.71845e+07	3.46722e+07	2.83411e+07	1.98933e+07	1.80482e+07	2.86754e+07	1.63367e+07	5.59905e+07	1.6847e+07	1.83451e+07	1.89277e+07	1.16751e+07	8.47444e+06	1.0249e+07	1.56406e+07	7.57644e+06	5	4	5	6	5	4	6	5	4	High	High	High	High	High	High	High
AN11055-T-p1	transcript=AN11055-T | gene=AN11055 | organism=Aspergillus_nidulans_FGSC_A4 | gene_product=Ortholog(s) have protein phosphatase type 1 regulator activity, ubiquitin binding activity | transcript_product=Ortholog(s) have protein phosphatase type 1 regulator activity, ubiquitin binding activity | location=ChrII_A_nidulans_FGSC_A4:1204292-1205507(-) | protein_length=373 | sequence_SO=chromosome | SO…	25	377	10	10	0	373	40.6	5.29	3908	30708.7	306.79	0	67.506		1.02319e+08	1.05018e+08	1.05967e+08	1.34843e+08	1.32825e+08	1.34837e+08	1.04198e+08	1.37072e+08	1.32546e+08	1.02319e+08	9.64123e+07	7.15107e+07	7.36112e+07	5.47174e+07	5.74398e+07	5.91708e+07	7.47638e+07	6.14707e+07	8	9	9	9	9	8	9	9	9	High	High	High	High	High	High	High
AN7000-T-p1	transcript=AN7000-T | gene=AN7000 | organism=Aspergillus_nidulans_FGSC_A4 | gene_product=Putative succinate-CoA ligase (ADP-forming) with a predicted role in the TCA cycle | transcript_product=Putative succinate-CoA ligase (ADP-forming) with a predicted role in the TCA cycle | location=ChrIV_A_nidulans_FGSC_A4:1355554-1357251(+) | protein_length=440 | sequence_SO=chromosome | SO=protein_coding | …	14	376	6	6	0	440	47.2	5.97	2973	26759.2	237.58	0	38.848		1.07426e+08	2.9633e+08	1.86957e+08	2.324e+08	2.24229e+08	2.60517e+08	2.11779e+08	2.61437e+08	2.6099e+08	1.07426e+08	2.72048e+08	1.26166e+08	1.26868e+08	9.23711e+07	1.10979e+08	1.20263e+08	1.42597e+08	1.21039e+08	6	6	7	7	7	7	7	7	7	High	High	High	High	High	High	High
AN5971-T-p1	transcript=AN5971-T | gene=AN5971 | organism=Aspergillus_nidulans_FGSC_A4 | gene_product=Putative NADH-ubiquinone oxidoreductase | transcript_product=Putative NADH-ubiquinone oxidoreductase | location=ChrI_A_nidulans_FGSC_A4:1635566-1636516(-) | protein_length=278 | sequence_SO=chromosome | SO=protein_coding | is_pseudo=false	40	376	9	9	0	278	31.6	5.48	2838	25526.9	268.28	0	55.67		7.84909e+07	1.0829e+08	1.50979e+08	1.09941e+08	1.47956e+08	1.29707e+08	1.3819e+08	1.37657e+08	1.4624e+08	7.84909e+07	9.94167e+07	1.01887e+08	6.0017e+07	6.09505e+07	5.52546e+07	7.84737e+07	7.50828e+07	6.78214e+07	9	7	7	7	7	8	7	7	7	High	High	High	High	High	High	High
AN2185-T-p1	transcript=AN2185-T | gene=AN2185 | organism=Aspergillus_nidulans_FGSC_A4 | gene_product=Putative homolog of mammalian EndoG and S. cerevisiae Nuc1p | transcript_product=Putative homolog of mammalian EndoG and S. cerevisiae Nuc1p | location=ChrVII_A_nidulans_FGSC_A4:3137728-3138732(-) | protein_length=334 | sequence_SO=chromosome | SO=protein_coding | is_pseudo=false	32	375	8	8	0	334	36.2	9.06	2410	27249.8	241.06	0	57.172		4.0144e+07	3.48749e+08	5.272e+07	4.95653e+07	4.22265e+07	4.13956e+07	1.18802e+08	3.87004e+07	7.26291e+07	4.0144e+07	3.20172e+08	3.55775e+07	2.70578e+07	1.73952e+07	1.76343e+07	6.74642e+07	2.11086e+07	3.36831e+07	7	6	7	7	8	8	7	8	8	High	High	High	High	High	High	High
AN2549-T-p1	transcript=AN2549-T | gene=AN2549 | organism=Aspergillus_nidulans_FGSC_A4 | gene_product=Putative acyl-CoA ligase | transcript_product=Putative acyl-CoA ligase | location=ChrVII_A_nidulans_FGSC_A4:4323905-4325875(-) | protein_length=565 | sequence_SO=chromosome | SO=protein_coding | is_pseudo=false	21	375	9	9	0	565	62.7	6.46	1873	25385.3	187.39	0	46.386		4.59324e+06	2.13043e+07	1.95831e+07	9.96121e+07	3.66171e+07	5.30879e+07	3.64262e+07	5.29661e+07	3.77538e+07	4.59324e+06	1.95586e+07	1.32154e+07	5.43785e+07	1.50844e+07	2.26152e+07	2.06854e+07	2.88896e+07	1.7509e+07	5	8	9	8	7	6	8	8	7	High	High	High	High	High	High	High
AN4016-T-p1	transcript=AN4016-T | gene=AN4016 | organism=Aspergillus_nidulans_FGSC_A4 | gene_product=Possible pseudogene, similar to 60S ribosomal protein L40 | transcript_product=Possible pseudogene, similar to 60S ribosomal protein L40 | location=ChrII_A_nidulans_FGSC_A4:2330673-2331837(-) | protein_length=218 | sequence_SO=chromosome | SO=protein_coding | is_pseudo=true	22	375	5	1	4	218	24.9	9.88	6403			0	34.296		5.50275e+08	4.40776e+08	5.23024e+08	4.00924e+08	4.04434e+08	6.40275e+08	3.75319e+08	6.2028e+08	6.08093e+08	5.50275e+08	4.04657e+08	3.52956e+08	2.18866e+08	1.66607e+08	2.72754e+08	2.13132e+08	3.38322e+08	2.82015e+08	5	5	5	5	5	5	5	5	5	High	High	High	High	High	High	High
AN3070-T-p1	transcript=AN3070-T | gene=AN3070 | organism=Aspergillus_nidulans_FGSC_A4 | gene_product=Ortholog(s) have chaperonin-containing T-complex, nucleus localization | transcript_product=Ortholog(s) have chaperonin-containing T-complex, nucleus localization | location=ChrVI_A_nidulans_FGSC_A4:1944467-1946042(-) | protein_length=473 | sequence_SO=chromosome | SO=protein_coding | is_pseudo=false	16	373	8	8	0	473	51.8	6.2	2030	21495.9	179.03	0	35.257		6.19714e+07	4.02974e+07	4.68113e+07	9.09662e+07	8.91328e+07	9.39858e+07	8.59666e+07	1.15942e+08	1.1449e+08	6.19714e+07	3.69953e+07	3.159e+07	4.96587e+07	3.67183e+07	4.00374e+07	4.88178e+07	6.32386e+07	5.30969e+07	6	6	4	7	7	6	5	7	6	High	High	High	High	High	High	High
AN8785-T-p1	transcript=AN8785-T | gene=AN8785 | organism=Aspergillus_nidulans_FGSC_A4 | gene_product=Ortholog(s) have L-aspartate transmembrane transporter activity, L-glutamate transmembrane transporter activity, antiporter activity, uniporter activity | transcript_product=Ortholog(s) have L-aspartate transmembrane transporter activity, L-glutamate transmembrane transporter activity, antiporter activity, un…	26	373	15	15	0	707	78.6	9.06	1882	22745.5	189.01	0	70.808		1.61351e+08	1.05617e+08	4.92216e+07	5.82103e+07	5.29725e+07	4.20071e+07	1.05256e+08	3.23284e+07	5.36377e+07	1.61351e+08	9.69628e+07	3.32166e+07	3.17772e+07	2.1822e+07	1.78948e+07	5.97717e+07	1.7633e+07	2.48755e+07	10	11	11	11	11	7	10	9	9	High	High	High	High	High	High	High
AN2225-T-p1	transcript=AN2225-T | gene=AN2225 | organism=Aspergillus_nidulans_FGSC_A4 | gene_product=Has domain(s) with predicted NAD binding, oxidoreductase activity, acting on the aldehyde or oxo group of donors, NAD or NADP as acceptor activity and role in cellular amino acid metabolic process, oxidation-reduction process | transcript_product=Has domain(s) with predicted NAD binding, oxidoreductase activi…	18	372	8	8	0	342	37.4	6.7	2006	25252.2	217.07	0	47.038		1.14467e+08	1.19874e+08	8.54792e+07	1.41104e+08	7.61495e+07	1.02123e+08	6.63691e+07	1.08005e+08	7.74903e+07	1.14467e+08	1.10051e+08	5.76846e+07	7.7029e+07	3.13698e+07	4.35038e+07	3.7689e+07	5.89097e+07	3.59376e+07	7	7	7	8	7	6	7	7	6	High	High	High	High	High	High	High
AN1947-T-p1	transcript=AN1947-T | gene=AN1947 | organism=Aspergillus_nidulans_FGSC_A4 | gene_product=Has domain(s) with predicted hydrolase activity | transcript_product=Has domain(s) with predicted hydrolase activity | location=ChrVII_A_nidulans_FGSC_A4:2343024-2344088(-) | protein_length=318 | sequence_SO=chromosome | SO=protein_coding | is_pseudo=false	21	371	7	7	0	318	35.7	5.73	2433	25937	253.88	0	32.809		1.76993e+07	5.21257e+07	8.09381e+07	9.96127e+07	5.28652e+07	4.00077e+07	4.80046e+07	3.05685e+07	1.33772e+08	1.76993e+07	4.78543e+07	5.46201e+07	5.43788e+07	2.17778e+07	1.70431e+07	2.72603e+07	1.66731e+07	6.20392e+07	6	5	7	7	6	7	7	6	5	High	High	High	High	High	High	High
AN4494-T-p1	transcript=AN4494-T | gene=AN4494 | organism=Aspergillus_nidulans_FGSC_A4 | gene_product=Ortholog(s) have cytosolic large ribosomal subunit, hyphal cell wall, mitochondrion, nucleus localization | transcript_product=Ortholog(s) have cytosolic large ribosomal subunit, hyphal cell wall, mitochondrion, nucleus localization | location=ChrIII_A_nidulans_FGSC_A4:1868649-1869709(-) | protein_length=140 …	33	370	5	5	0	140	14.8	10.21	2753	27090.2	280.04	0	29.314		7.33697e+07	1.24958e+08	1.46123e+08	2.47537e+07	6.78078e+07	1.594e+08	2.0168e+08	1.16746e+08	1.25618e+08	7.33697e+07	1.14719e+08	9.86094e+07	1.35131e+07	2.79334e+07	6.79037e+07	1.14528e+08	6.36775e+07	5.82576e+07	5	3	4	5	3	4	3	4	4	High	High	High	High	High	High	High
AN4281-T-p1	transcript=AN4281-T | gene=AN4281 | organism=Aspergillus_nidulans_FGSC_A4 | gene_product=Putative GTPase with a predicted role in transport between cis and medial Golgi compartments | transcript_product=Putative GTPase with a predicted role in transport between cis and medial Golgi compartments | location=ChrII_A_nidulans_FGSC_A4:1520443-1521522(+) | protein_length=201 | sequence_SO=chromosome | …	47	369	9	7	2	201	22.3	5.27	2383	24500	269.37	0	45.1	Acetyl [N-Term]	9.13578e+07	2.65946e+08	3.31472e+08	2.56696e+08	3.03384e+08	3.44344e+08	3.71379e+08	9.15275e+07	1.2789e+08	9.13578e+07	2.44153e+08	2.2369e+08	1.40131e+08	1.24979e+08	1.46689e+08	2.10895e+08	4.99223e+07	5.93112e+07	8	9	9	9	8	9	9	9	9	High	High	High	High	High	High	High
AN4862-T-p1	transcript=AN4862-T | gene=AN4862 | organism=Aspergillus_nidulans_FGSC_A4 | gene_product=Putative Ran GTPase activating protein (GAP) with homology to Saccharomyces cerevisiae Rna1p | transcript_product=Putative Ran GTPase activating protein (GAP) with homology to Saccharomyces cerevisiae Rna1p | location=ChrIII_A_nidulans_FGSC_A4:738431-739684(+) | protein_length=417 | sequence_SO=chromosome | S…	32	368	12	12	0	417	45.4	4.75	2214	24436.8	275.73	0	50.48		4.69955e+07	1.56403e+08	7.73109e+07	1.0932e+08	9.61266e+07	8.16258e+07	8.07327e+07	7.31313e+07	9.99742e+07	4.69955e+07	1.43587e+08	5.21723e+07	5.96779e+07	3.95993e+07	3.47722e+07	4.58457e+07	3.98884e+07	4.6365e+07	9	8	10	11	11	10	10	9	9	High	High	High	High	High	High	High
AN10475-T-p1	transcript=AN10475-T | gene=AN10475 | organism=Aspergillus_nidulans_FGSC_A4 | gene_product=Ortholog(s) have cytosol localization | transcript_product=Ortholog(s) have cytosol localization | location=ChrII_A_nidulans_FGSC_A4:2803113-2804495(+) | protein_length=424 | sequence_SO=chromosome | SO=protein_coding | is_pseudo=false	26	368	10	10	0	424	48.4	7.11	2087	24350.2	277.68	0	49.464		60561683	2.33246e+07	2.70162e+07	7.26862e+07	7.15903e+07	7.17398e+07	4.81834e+07	6.21482e+07	4.27838e+07	60561683	2.14133e+07	1.82316e+07	3.96796e+07	2.94916e+07	3.05608e+07	2.73619e+07	3.38978e+07	1.98418e+07	8	8	7	7	7	8	6	7	8	High	High	High	High	High	High	High
AN6508-T-p1	transcript=AN6508-T | gene=AN6508 | organism=Aspergillus_nidulans_FGSC_A4 | gene_product=protein kinase | transcript_product=protein kinase | location=ChrI_A_nidulans_FGSC_A4:2322891-2324477(-) | protein_length=394 | sequence_SO=chromosome | SO=protein_coding | is_pseudo=false	36	367	14	14	0	394	45.2	8.51	1914	24916.7	234.84	0	77.231		4.77637e+07	4.05086e+07	3.90505e+07	4.91397e+07	1.75164e+07	4.27715e+07	5.58531e+07	3.06735e+07	7.19173e+07	4.77637e+07	3.71892e+07	2.63528e+07	2.68255e+07	7.21587e+06	1.82205e+07	3.17173e+07	1.67304e+07	3.3353e+07	8	8	5	9	6	6	8	7	6	High	High	High	High	High	High	High
AN4323-T-p1	transcript=AN4323-T | gene=AN4323 | organism=Aspergillus_nidulans_FGSC_A4 | gene_product=Putative branched chain amino acid aminotransferase with a predicted role in valine, leucine, and isoleucine metabolism | transcript_product=Putative branched chain amino acid aminotransferase with a predicted role in valine, leucine, and isoleucine metabolism | location=ChrIII_A_nidulans_FGSC_A4:2394921-2396…	16	366	6	6	0	456	50.4	8.79	2844	24955.4	233.42	0	37.277		4.67415e+07	4.88569e+07	5.35723e+07	4.9627e+07	4.12927e+07	5.41688e+07	4.94763e+07	6.07536e+07	5.83615e+07	4.67415e+07	4.48534e+07	3.61526e+07	2.70915e+07	1.70105e+07	2.30756e+07	2.80961e+07	3.31372e+07	2.70663e+07	5	4	6	6	6	7	6	6	5	High	High	High	High	High	High	High
AN5665-T-p1	transcript=AN5665-T | gene=AN5665 | organism=Aspergillus_nidulans_FGSC_A4 | gene_product=Putative cytochrome P450 | transcript_product=Putative cytochrome P450 | location=ChrV_A_nidulans_FGSC_A4:2039868-2041581(-) | protein_length=516 | sequence_SO=chromosome | SO=protein_coding | is_pseudo=false	26	366	12	12	0	516	59	8.68	2057	21673.7	202.45	0	58.742		9.04511e+07	6.04027e+07	5.93528e+07	6.58713e+07	6.0598e+07	3.15743e+07	1.38006e+08	4.42405e+07	6.86591e+07	9.04511e+07	5.54531e+07	4.00535e+07	3.59593e+07	2.49633e+07	1.34505e+07	7.83692e+07	2.41303e+07	3.1842e+07	9	9	8	10	9	10	11	8	8	High	High	High	High	High	High	High
AN5658-T-p1	transcript=AN5658-T | gene=AN5658 | organism=Aspergillus_nidulans_FGSC_A4 | gene_product=Has domain(s) with predicted gamma-glutamyltransferase activity and role in glutathione metabolic process | transcript_product=Has domain(s) with predicted gamma-glutamyltransferase activity and role in glutathione metabolic process | location=ChrV_A_nidulans_FGSC_A4:2068174-2070135(-) | protein_length=606 | …	38	366	16	16	0	606	64.3	6.25	1229	20687.2	197.78	0	81.439		1.63328e+08	4.96635e+07	7.33608e+07	7.15417e+07	1.01872e+08	1.30801e+08	1.10341e+08	2.64388e+07	5.47597e+07	1.63328e+08	4.5594e+07	4.95067e+07	3.90548e+07	4.19663e+07	5.57204e+07	6.26595e+07	1.44206e+07	2.53959e+07	12	11	11	11	9	11	10	8	9	High	High	High	High	High	High	High
AN6346-T-p1	transcript=AN6346-T | gene=AN6346 | organism=Aspergillus_nidulans_FGSC_A4 | gene_product=Putative dihydroxy-acid dehydratase with a predicted role in valine, leucine, and isoleucine metabolism | transcript_product=Putative dihydroxy-acid dehydratase with a predicted role in valine, leucine, and isoleucine metabolism | location=ChrI_A_nidulans_FGSC_A4:454240-456222(+) | protein_length=613 | sequen…	22	364	12	12	0	613	65.3	6.86	2470	22911.8	233.5	0	60.859		5.05568e+07	5.50675e+07	4.65524e+07	5.78221e+07	3.90397e+07	5.97073e+07	9.2527e+07	9.0198e+07	9.41479e+07	5.05568e+07	5.05551e+07	3.14153e+07	3.15652e+07	1.60824e+07	2.5435e+07	5.25433e+07	4.91971e+07	4.36629e+07	9	8	7	8	8	8	10	8	8	High	High	High	High	High	High	High
AN7594-T-p1	transcript=AN7594-T | gene=AN7594 | organism=Aspergillus_nidulans_FGSC_A4 | gene_product=DUF636 domain-containing protein | transcript_product=DUF636 domain-containing protein | location=ChrIV_A_nidulans_FGSC_A4:2079286-2079799(-) | protein_length=136 | sequence_SO=chromosome | SO=protein_coding | is_pseudo=false	37	363	6	6	0	136	14.8	6.51	749	20007.3	128.83	0	32.419		3.96242e+08	6.08087e+08	5.38989e+08	3.89761e+08	3.47667e+08	3.34979e+08	3.4331e+08	2.466e+08	1.92307e+08	3.96242e+08	5.58258e+08	3.63731e+08	2.12772e+08	1.43221e+08	1.427e+08	1.94956e+08	1.34504e+08	8.91861e+07	5	4	5	6	5	6	4	5	4	High	High	High	High	High	High	High
AN5563-T-p1	transcript=AN5563-T | gene=AN5563 | organism=Aspergillus_nidulans_FGSC_A4 | gene_product=Putative dehydrogenase with a predicted role in carbohydrate metabolism | transcript_product=Putative dehydrogenase with a predicted role in carbohydrate metabolism | location=ChrV_A_nidulans_FGSC_A4:2399217-2400252(+) | protein_length=325 | sequence_SO=chromosome | SO=protein_coding | is_pseudo=false	32	361	8	8	0	325	37	6.27	2629	23990.9	261.5	0	34.169		6.21769e+07	2.11808e+08	1.03533e+08	1.52364e+08	1.56883e+08	1.3815e+08	1.19177e+08	1.19005e+08	1.33935e+08	6.21769e+07	1.94452e+08	6.98682e+07	8.31757e+07	6.46279e+07	5.88513e+07	67677218	6.49097e+07	6.21151e+07	6	5	7	6	6	7	6	6	6	High	High	High	High	High	High	High
AN6923-T-p1	transcript=AN6923-T | gene=AN6923 | organism=Aspergillus_nidulans_FGSC_A4 | gene_product=Putative high-affinity hexose transporter with a predicted role in hexose transport | transcript_product=Putative high-affinity hexose transporter with a predicted role in hexose transport | location=ChrI_A_nidulans_FGSC_A4:3582937-3584517(+) | protein_length=473 | sequence_SO=chromosome | SO=protein_coding |…	15	361	6	6	0	473	52.4	8.25	2878	27449	282.44	0	34.194		1.33977e+08	1.18281e+08	1.76473e+08	1.8196e+08	2.03138e+08	1.98409e+08	2.0205e+08	2.13168e+08	2.44553e+08	1.33977e+08	1.08589e+08	119090862	9.93323e+07	8.36825e+07	8.45214e+07	1.14738e+08	1.16269e+08	1.13416e+08	4	3	3	5	4	5	4	4	4	High	High	High	High	High	High	High
AN3824-T-p1	transcript=AN3824-T | gene=AN3824 | organism=Aspergillus_nidulans_FGSC_A4 | gene_product=Ortholog(s) have phenylalanine-tRNA ligase activity, role in phenylalanyl-tRNA aminoacylation and cytosol, phenylalanine-tRNA ligase complex localization | transcript_product=Ortholog(s) have phenylalanine-tRNA ligase activity, role in phenylalanyl-tRNA aminoacylation and cytosol, phenylalanine-tRNA ligase co…	20	361	9	9	0	516	58.2	6.83	2209	24667.1	242.49	0	44.609		8.75485e+07	7.8614e+07	8.4446e+07	8.43839e+07	1.05696e+08	9.93285e+07	9.47163e+07	8.06875e+07	7.98972e+07	8.75485e+07	7.21721e+07	5.69874e+07	4.60654e+07	4.35416e+07	4.23134e+07	5.37865e+07	4.40098e+07	3.70539e+07	9	8	8	9	9	8	9	7	8	High	High	High	High	High	High	High
AN4416-T-p1	transcript=AN4416-T | gene=AN4416 | organism=Aspergillus_nidulans_FGSC_A4 | gene_product=Syntaxin | transcript_product=Syntaxin | location=ChrIII_A_nidulans_FGSC_A4:2115193-2116080(+) | protein_length=273 | sequence_SO=chromosome | SO=protein_coding | is_pseudo=false	16	358	4	4	0	273	31.1	5.16	2964	26041.5	252.9	0	24.475		9.06989e+07	2.602e+07	2.99786e+07	9.91395e+07	6.52795e+07	6.15373e+07	4.07565e+07	2.24427e+07	5.28749e+07	9.06989e+07	2.38879e+07	2.02307e+07	5.41205e+07	2.68919e+07	2.62146e+07	2.31444e+07	1.2241e+07	2.45217e+07	4	4	4	4	4	4	4	3	4	High	High	High	High	High	High	High
Afu1g00990-T-p1	transcript=Afu1g00990-T | gene=Afu1g00990 | organism=Aspergillus_fumigatus_Af293 | gene_product=Short chain dehydrogenase atsC, putative | transcript_product=Short chain dehydrogenase atsC, putative | location=Chr1_A_fumigatus_Af293:347632-348512(-) | protein_length=261 | sequence_SO=chromosome | SO=protein_coding | is_pseudo=false	37	357	8	8	0	261	28.5	6.68	5894	35534.4	333.43	0	60.148		9.88166e+07	3.62348e+07	5.99631e+07	1.41268e+08	1.40039e+08	1.43201e+08	1.33144e+08	1.60403e+08	2.55071e+08	9.88166e+07	3.32656e+07	4.04654e+07	7.71187e+07	5.76889e+07	6.1003e+07	7.56084e+07	8.74894e+07	1.18294e+08	6	6	6	6	6	7	6	6	5	High	High	High	High	High	High	High
AN9103-T-p1	transcript=AN9103-T | gene=AN9103 | organism=Aspergillus_nidulans_FGSC_A4 | gene_product=Putative apoptosis-inducing factor (AIF)-like mitochondrial oxidoreductase | transcript_product=Putative apoptosis-inducing factor (AIF)-like mitochondrial oxidoreductase | location=ChrVI_A_nidulans_FGSC_A4:424649-426785(+) | protein_length=666 | sequence_SO=chromosome | SO=protein_coding | is_pseudo=false	14	357	8	8	0	666	72	8.57	1403	19497.6	155.19	0	41.672		2.48827e+07	4.40411e+07	6.07362e+07	4.82904e+07	9.3763e+07	9.97676e+07	9.78102e+07	6.13775e+07	3.92669e+07	2.48827e+07	4.04323e+07	4.09871e+07	2.63619e+07	3.86257e+07	4.25005e+07	5.55434e+07	3.34774e+07	1.82108e+07	7	7	6	6	6	6	6	7	6	High	High	High	High	High	High	High
AN3741-T-p1	transcript=AN3741-T | gene=AN3741 | organism=Aspergillus_nidulans_FGSC_A4 | gene_product=Alcohol dehydrogenase II, has a predicted role in two-carbon compound metabolism | transcript_product=Alcohol dehydrogenase II, has a predicted role in two-carbon compound metabolism | location=ChrII_A_nidulans_FGSC_A4:3216132-3217451(-) | protein_length=367 | sequence_SO=chromosome | SO=protein_coding | is_p…	16	355	5	5	0	367	38.7	6.89	2192	23882.5	220.67	0	36.974		6.96702e+08	2.54304e+08	2.87426e+08	2.12862e+08	1.81428e+08	1.83084e+08	6.59182e+08	2.2235e+08	1.50674e+08	6.96702e+08	2.33465e+08	1.93966e+08	1.16202e+08	7.47391e+07	7.79926e+07	3.74329e+08	1.21277e+08	6.98778e+07	5	5	5	5	5	5	5	5	4	High	High	High	High	High	High	High
AN1805-T-p1	transcript=AN1805-T | gene=AN1805 | organism=Aspergillus_nidulans_FGSC_A4 | gene_product=Putative carbonic anhydrase | transcript_product=Putative carbonic anhydrase | location=ChrVII_A_nidulans_FGSC_A4:1948338-1949190(-) | protein_length=264 | sequence_SO=chromosome | SO=protein_coding | is_pseudo=false	25	355	7	7	0	264	29.7	7.14	3801	30622.7	280.37	0	43.412		8.42297e+07	8.77982e+06	2.12395e+07	3.56595e+07	4.87559e+07	3.63892e+07	1.52881e+07	4.04968e+07	5.49072e+07	8.42297e+07	8.06037e+06	1.43332e+07	1.94666e+07	2.0085e+07	1.55016e+07	8.68162e+06	2.20884e+07	2.54643e+07	6	6	7	5	5	5	6	7	7	High	High	High	High	High	High	High
AN6500-T-p1	transcript=AN6500-T | gene=AN6500 | organism=Aspergillus_nidulans_FGSC_A4 | gene_product=Ortholog(s) have cytosol localization | transcript_product=Ortholog(s) have cytosol localization | location=ChrI_A_nidulans_FGSC_A4:2300506-2301283(-) | protein_length=157 | sequence_SO=chromosome | SO=protein_coding | is_pseudo=false	29	353	7	7	0	157	17.1	10.68	1284	22404.6	203.77	0	36.337		2.16276e+08	3.14588e+08	3.44219e+08	1.58486e+08	2.25632e+08	1.76584e+08	3.33305e+08	1.77921e+08	1.13727e+08	2.16276e+08	2.88809e+08	2.32292e+08	8.65182e+07	9.29489e+07	7.52239e+07	1.89274e+08	9.70443e+07	5.27431e+07	7	6	7	7	7	7	6	4	6	High	High	High	High	High	High	High
AN3748-T-p1	transcript=AN3748-T | gene=AN3748 | organism=Aspergillus_nidulans_FGSC_A4 | gene_product=Putative ATP phosphoribosyltransferase with a predicted role in histidine metabolism | transcript_product=Putative ATP phosphoribosyltransferase with a predicted role in histidine metabolism | location=ChrII_A_nidulans_FGSC_A4:3192507-3193707(+) | protein_length=307 | sequence_SO=chromosome | SO=protein_codin…	25	353	8	8	0	307	32.9	5.34	2613	25183	261.84	0	41.661	Acetyl [N-Term]	1.69089e+08	8.26567e+07	1.01025e+08	8.48528e+07	9.47664e+07	6.95425e+07	8.13156e+07	5.97599e+07	2.31889e+08	1.69089e+08	7.58836e+07	6.81757e+07	4.63214e+07	3.9039e+07	2.96247e+07	4.61767e+07	3.25951e+07	1.07543e+08	7	7	6	8	7	5	7	7	7	High	High	High	High	High	High	High
AN7708-T-p1	transcript=AN7708-T | gene=AN7708 | organism=Aspergillus_nidulans_FGSC_A4 | gene_product=Ortholog(s) have alditol:NADP+ 1-oxidoreductase activity, role in D-xylose catabolic process, arabinose catabolic process, cellular response to oxidative stress and cytosol, nucleus localization | transcript_product=Ortholog(s) have alditol:NADP+ 1-oxidoreductase activity, role in D-xylose catabolic process, …	29	352	9	9	0	283	31.6	7.2	1315	18782.7	134.26	0	29.854		9.33822e+07	1.5443e+08	1.01103e+08	2.85528e+08	2.65187e+08	2.82025e+08	2.73199e+08	3.23092e+08	1.67133e+08	9.33822e+07	1.41776e+08	6.82283e+07	1.5587e+08	1.09244e+08	1.20141e+08	1.55141e+08	1.76226e+08	7.75112e+07	6	7	7	8	7	7	7	7	7	High	High	High	High	High	High	High
AN8853-T-p1	transcript=AN8853-T | gene=AN8853 | organism=Aspergillus_nidulans_FGSC_A4 | gene_product=Putative eukaryotic polypeptide releasing factor | transcript_product=Putative eukaryotic polypeptide releasing factor | location=ChrIII_A_nidulans_FGSC_A4:2591480-2592956(+) | protein_length=435 | sequence_SO=chromosome | SO=protein_coding | is_pseudo=false	23	352	9	9	0	435	48.8	5.31	1867	23810.1	213.8	0	49.932		4.13655e+07	4.06336e+07	4.15066e+07	6.80464e+07	7.4673e+07	9.61242e+07	1.18257e+08	9.33745e+07	1.15868e+08	4.13655e+07	3.7304e+07	2.80103e+07	3.71467e+07	3.07615e+07	4.09484e+07	6.71544e+07	5.09297e+07	5.37361e+07	7	9	9	8	8	8	8	9	6	High	High	High	High	High	High	High
AN2765-T-p1	transcript=AN2765-T | gene=AN2765 | organism=Aspergillus_nidulans_FGSC_A4 | gene_product=Putative histone H1 | transcript_product=Putative histone H1 | location=ChrVI_A_nidulans_FGSC_A4:2872326-2873551(-) | protein_length=200 | sequence_SO=chromosome | SO=protein_coding | is_pseudo=false	27	351	5	5	0	200	21.1	10.68	3457	23092.2	249.49	0	34.71		2.52203e+08	2.84108e+08	3.0772e+08	1.30296e+08	1.0768e+08	1.46865e+08	1.49595e+08	1.15556e+08	9.60258e+07	2.52203e+08	2.60827e+08	2.07661e+08	7.11289e+07	4.43587e+07	6.25638e+07	8.49507e+07	6.30281e+07	4.45338e+07	5	5	5	5	5	5	5	4	5	High	High	High	High	High	High	High
AN2272-T-p1	transcript=AN2272-T | gene=AN2272 | organism=Aspergillus_nidulans_FGSC_A4 | gene_product=Putative kinase with a predicted role in ribose metabolism or nucleotide salvage pathways | transcript_product=Putative kinase with a predicted role in ribose metabolism or nucleotide salvage pathways | location=ChrVII_A_nidulans_FGSC_A4:3405655-3407095(-) | protein_length=352 | sequence_SO=chromosome | SO=pr…	41	351	11	11	0	352	38.3	5.53	2726	28322.9	270.29	0	69.628	Acetyl [N-Term]	2.19669e+08	2.7087e+08	2.46629e+08	1.65127e+08	2.05242e+08	2.04746e+08	1.72499e+08	1.72794e+08	4.70175e+08	2.19669e+08	2.48674e+08	1.66435e+08	9.01432e+07	8.45494e+07	8.72209e+07	9.79567e+07	9.42481e+07	2.18053e+08	9	8	9	9	11	8	8	9	8	High	High	High	High	High	High	High
AN5602-T-p1	transcript=AN5602-T | gene=AN5602 | organism=Aspergillus_nidulans_FGSC_A4 | gene_product=Ortholog(s) have ATPase activator activity, chaperone binding activity, role in cellular response to heat, positive regulation of ATPase activity, protein folding and cytosol localization | transcript_product=Ortholog(s) have ATPase activator activity, chaperone binding activity, role in cellular response to …	23	350	7	7	0	349	38.9	5.5	1835	21867.6	229.74	0	41.65		6.85118e+07	7.11811e+07	7.23586e+07	1.16209e+08	1.35488e+08	1.46835e+08	1.62873e+08	1.9868e+08	1.91094e+08	6.85118e+07	6.53483e+07	4.88304e+07	6.34386e+07	5.58142e+07	6.2551e+07	9.24905e+07	1.08367e+08	8.86236e+07	7	6	6	5	7	6	6	7	7	High	High	High	High	High	High	High
AN4745-T-p1	transcript=AN4745-T | gene=AN4745 | organism=Aspergillus_nidulans_FGSC_A4 | gene_product=Predicted Rho GTPase activating protein | transcript_product=Predicted Rho GTPase activating protein | location=ChrIII_A_nidulans_FGSC_A4:1114063-1116509(-) | protein_length=665 | sequence_SO=chromosome | SO=protein_coding | is_pseudo=false	30	349	17	17	0	665	72.4	6.04	2539	22852.7	250.51	0	75.47		5.91526e+07	5.89117e+07	5.03081e+07	1.09927e+08	8.20465e+07	8.99812e+07	8.69766e+07	1.05949e+08	7.10919e+07	5.91526e+07	5.40843e+07	3.39498e+07	6.00093e+07	3.3799e+07	3.83315e+07	4.93914e+07	5.77881e+07	3.29702e+07	12	13	14	14	13	13	13	13	10	High	High	High	High	High	High	High
AN7121-T-p1	transcript=AN7121-T | gene=AN7121 | organism=Aspergillus_nidulans_FGSC_A4 | gene_product=Has domain(s) with predicted metallocarboxypeptidase activity, zinc ion binding activity and role in proteolysis | transcript_product=Has domain(s) with predicted metallocarboxypeptidase activity, zinc ion binding activity and role in proteolysis | location=ChrIV_A_nidulans_FGSC_A4:945463-947146(-) | protein_…	28	348	12	12	0	541	59.1	4.98	2040	25553.4	262.95	0	72.745		3.95367e+07	2.61962e+07	4.5219e+07	5.47881e+07	4.4596e+07	5.00429e+07	5.51188e+07	3.84425e+07	5.54008e+07	3.95367e+07	2.40496e+07	3.05155e+07	2.9909e+07	1.83713e+07	2.1318e+07	3.13003e+07	2.09679e+07	2.56932e+07	9	7	7	8	6	6	7	8	7	High	High	High	High	High	High	High
AN0912-T-p1	transcript=AN0912-T | gene=AN0912 | organism=Aspergillus_nidulans_FGSC_A4 | gene_product=Putative Beta-isopropylmalate dehydrogenase with a predicted role in valine, leucine, and isoleucine metabolism | transcript_product=Putative Beta-isopropylmalate dehydrogenase with a predicted role in valine, leucine, and isoleucine metabolism | location=ChrVIII_A_nidulans_FGSC_A4:2095685-2097106(+) | protei…	29	348	9	9	0	366	39	5.48	2169	23875.2	259.06	0	47.862		9.56557e+07	5.10017e+07	1.09031e+08	1.35434e+08	1.07093e+08	1.25785e+08	1.63687e+08	1.32662e+08	6.49948e+07	9.56557e+07	4.68225e+07	7.35781e+07	7.39337e+07	4.41168e+07	5.35838e+07	9.29531e+07	7.23582e+07	3.01426e+07	9	8	9	9	8	8	9	9	7	High	High	High	High	High	High	High
AN2412-T-p1	transcript=AN2412-T | gene=AN2412 | organism=Aspergillus_nidulans_FGSC_A4 | gene_product=Calcium/calmodulin-dependent protein kinase A | transcript_product=Calcium/calmodulin-dependent protein kinase A | location=ChrVII_A_nidulans_FGSC_A4:3847793-3849525(+) | protein_length=414 | sequence_SO=chromosome | SO=protein_coding | is_pseudo=false	28	345	9	9	0	414	46.8	6.87	956	22054.8	225.54	0	54.829	Acetyl [N-Term]	1.36786e+07	1.68607e+07	3.70263e+07	1.42278e+07	2.9978e+07	2.02901e+07	2.9804e+07	3.11847e+07	2.49256e+07	1.36786e+07	1.54791e+07	2.49867e+07	7.76699e+06	1.23494e+07	8.64349e+06	1.69248e+07	1.70093e+07	1.15597e+07	6	6	6	7	7	7	6	7	5	High	High	High	High	High	High	High
AN3366-T-p1	transcript=AN3366-T | gene=AN3366 | organism=Aspergillus_nidulans_FGSC_A4 | gene_product=Ortholog of Aspergillus versicolor : Aspve1_0051963 and Aspergillus sydowii : Aspsy1_0088131 | transcript_product=Ortholog of Aspergillus versicolor : Aspve1_0051963 and Aspergillus sydowii : Aspsy1_0088131 | location=ChrVI_A_nidulans_FGSC_A4:946285-946813(-) | protein_length=104 | sequence_SO=chromosome | SO…	44	345	5	5	0	104	11.9	6.18	1813	25630.7	262.02	0	32.523		7.988e+06	3.44082e+07	4.65552e+07	2.68157e+07	1.41775e+07	3.45064e+07	2.41293e+07	4.10786e+07	3.14358e+07	7.988e+06	3.15887e+07	3.14172e+07	1.46388e+07	5.84043e+06	1.46996e+07	1.37023e+07	2.24057e+07	1.45789e+07	3	4	4	4	3	4	4	4	4	High	High	High	High	High	High	High
AN8224-T-p1	transcript=AN8224-T | gene=AN8224 | organism=Aspergillus_nidulans_FGSC_A4 | gene_product=Ortholog(s) have cytosol, nucleus localization | transcript_product=Ortholog(s) have cytosol, nucleus localization | location=ChrII_A_nidulans_FGSC_A4:1196283-1198473(-) | protein_length=680 | sequence_SO=chromosome | SO=protein_coding | is_pseudo=false	21	345	13	13	0	680	77	7.49	3127	25265.1	203.89	0	78.531		2.43975e+07	3.36429e+07	3.16469e+07	9.6424e+07	8.80425e+07	9.21769e+07	6.65959e+07	3.64976e+07	3.72422e+07	2.43975e+07	3.08861e+07	2.13565e+07	5.26381e+07	3.62691e+07	3.92669e+07	3.78178e+07	1.99071e+07	1.72718e+07	8	10	8	10	10	10	9	9	10	High	High	High	High	High	High	High
AN8023-T-p1	transcript=AN8023-T | gene=AN8023 | organism=Aspergillus_nidulans_FGSC_A4 | gene_product=Protein required for vacuole biogenesis | transcript_product=Protein required for vacuole biogenesis | location=ChrII_A_nidulans_FGSC_A4:526573-529070(+) | protein_length=696 | sequence_SO=chromosome | SO=protein_coding | is_pseudo=false	21	344	15	14	1	696	77.6	8.29	1477	19986.4	193.23	0	56.926		6.96966e+07	5.3291e+07	6.5855e+07	1.68553e+08	2.11029e+08	2.18526e+08	1.24754e+08	1.01138e+08	1.34844e+08	6.96966e+07	4.89242e+07	4.44415e+07	9.20137e+07	8.69334e+07	9.30911e+07	7.08441e+07	5.51643e+07	6.25366e+07	11	11	8	10	10	11	9	10	12	High	High	High	High	High	High	High
AN8012-T-p1	transcript=AN8012-T | gene=AN8012 | organism=Aspergillus_nidulans_FGSC_A4 | gene_product=Putative bifunctional enzyme with a predicted role in sterol metabolism | transcript_product=Putative bifunctional enzyme with a predicted role in sterol metabolism | location=ChrII_A_nidulans_FGSC_A4:497552-498654(-) | protein_length=347 | sequence_SO=chromosome | SO=protein_coding | is_pseudo=false	33	344	12	12	0	347	39.5	5.39	3044	25496.1	265.35	0	52.9		1.26572e+08	1.54975e+08	1.23526e+08	1.68857e+08	1.56446e+08	1.24312e+08	1.44374e+08	1.26207e+08	6.84555e+07	1.26572e+08	1.42276e+08	8.33601e+07	9.21794e+07	6.44481e+07	5.29563e+07	8.19854e+07	6.88378e+07	3.17476e+07	7	7	7	7	9	9	8	8	8	High	High	High	High	High	High	High
AN2414-T-p1	transcript=AN2414-T | gene=AN2414 | organism=Aspergillus_nidulans_FGSC_A4 | gene_product=Putative NADH dehydrogenase (ubiquinone) with a predicted role in energy metabolism | transcript_product=Putative NADH dehydrogenase (ubiquinone) with a predicted role in energy metabolism | location=ChrVII_A_nidulans_FGSC_A4:3851943-3853480(-) | protein_length=475 | sequence_SO=chromosome | SO=protein_coding…	27	343	10	10	0	475	53.2	6.65	2895	26537.1	256.66	0	59.628		3.05284e+07	5.54084e+07	5.67609e+07	4.7046e+07	7.20265e+07	6.10919e+07	2.68329e+07	3.32301e+07	4.53043e+07	3.05284e+07	5.0868e+07	3.83044e+07	2.56825e+07	2.96713e+07	2.60248e+07	1.52376e+07	1.81249e+07	2.10107e+07	7	9	7	8	8	7	8	6	7	High	High	High	High	High	High	High
AN1256-T-p1	transcript=AN1256-T | gene=AN1256 | organism=Aspergillus_nidulans_FGSC_A4 | gene_product=Ortholog(s) have cytosol localization | transcript_product=Ortholog(s) have cytosol localization | location=ChrVIII_A_nidulans_FGSC_A4:1031464-1033195(-) | protein_length=506 | sequence_SO=chromosome | SO=protein_coding | is_pseudo=false	24	341	10	10	0	506	57.1	6.49	2153	23257.7	221.5	0	46.699		8.17546e+07	1.01463e+08	8.38982e+07	7.84558e+07	6.69411e+07	7.25649e+07	1.05456e+08	2.86291e+07	4.07512e+07	8.17546e+07	9.31492e+07	5.66177e+07	4.28292e+07	2.75764e+07	3.09123e+07	5.9885e+07	1.56153e+07	1.88992e+07	6	7	7	7	7	7	7	7	7	High	High	High	High	High	High	High
AN0432-T-p1	transcript=AN0432-T | gene=AN0432 | organism=Aspergillus_nidulans_FGSC_A4 | gene_product=Ortholog(s) have cytochrome-b5 reductase activity, acting on NAD(P)H activity and role in cellular response to oxidative stress, ergosterol biosynthetic process | transcript_product=Ortholog(s) have cytochrome-b5 reductase activity, acting on NAD(P)H activity and role in cellular response to oxidative stress,…	29	340	8	8	0	322	36.1	8.73	2453	23134.8	209.83	0	50.183		6.6739e+07	8.86955e+07	7.79966e+07	8.05675e+07	4.67822e+07	7.12924e+07	8.27747e+07	5.15797e+07	3.64429e+07	6.6739e+07	8.14276e+07	5.26351e+07	4.3982e+07	1.92719e+07	3.03702e+07	4.70052e+07	2.81334e+07	1.69011e+07	7	6	7	8	6	7	6	5	7	High	High	High	High	High	High	High
AN1966-T-p1	transcript=AN1966-T | gene=AN1966 | organism=Aspergillus_nidulans_FGSC_A4 | gene_product=Putative HECT ubiquitin ligase | transcript_product=Putative HECT ubiquitin ligase | location=ChrVII_A_nidulans_FGSC_A4:2408808-2421142(-) | protein_length=4019 | sequence_SO=chromosome | SO=protein_coding | is_pseudo=false	9	338	29	29	0	4019	447.8	5.05	2523	22576.8	203.2	0	150.33		2.87777e+07	2.29814e+07	1.8423e+07	3.35574e+07	4.15188e+07	4.00932e+07	3.21764e+07	3.15181e+07	7.63553e+07	2.87777e+07	2.10982e+07	1.24325e+07	1.83191e+07	1.71037e+07	1.70795e+07	1.8272e+07	1.71911e+07	3.54112e+07	13	16	13	16	21	20	18	17	21	High	High	High	High	High	High	High
AN6231-T-p1	transcript=AN6231-T | gene=AN6231 | organism=Aspergillus_nidulans_FGSC_A4 | gene_product=Tryptophan synthase involved in tryptophan biosynthesis | transcript_product=Tryptophan synthase involved in tryptophan biosynthesis | location=ChrI_A_nidulans_FGSC_A4:818935-821267(-) | protein_length=723 | sequence_SO=chromosome | SO=protein_coding | is_pseudo=false	17	338	10	10	0	723	77.5	6.1	3063	28661.9	290.47	0	63.801		5.85251e+07	1.16327e+08	1.41357e+08	7.82665e+07	8.61364e+07	8.07305e+07	6.50799e+07	1.72568e+08	1.02438e+08	5.85251e+07	1.06794e+08	9.53931e+07	4.27259e+07	3.54839e+07	3.43908e+07	3.69569e+07	9.41246e+07	4.75076e+07	8	6	8	9	8	8	8	8	5	High	High	High	High	High	High	High
AN7687-T-p1	transcript=AN7687-T | gene=AN7687 | organism=Aspergillus_nidulans_FGSC_A4 | gene_product=Ortholog(s) have preprotein binding activity, role in conidium formation, hyphal growth, protein targeting to mitochondrion and mitochondrial outer membrane translocase complex localization | transcript_product=Ortholog(s) have preprotein binding activity, role in conidium formation, hyphal growth, protein ta…	25	337	11	11	0	635	70.3	5.81	2654	25288	219.38	0	70.561		5.30784e+07	9.22554e+07	1.14333e+08	8.44547e+07	1.01882e+08	8.74774e+07	1.09988e+08	1.08852e+08	1.01411e+08	5.30784e+07	8.46957e+07	7.7156e+07	4.61041e+07	4.19702e+07	3.72649e+07	6.24591e+07	5.93718e+07	4.70315e+07	8	9	9	9	10	10	9	8	8	High	High	High	High	High	High	High
AN7479-T-p1	transcript=AN7479-T | gene=AN7479 | organism=Aspergillus_nidulans_FGSC_A4 | gene_product=Putative asparaginyl-tRNA synthetase with a predicted role in tRNA charging for translation | transcript_product=Putative asparaginyl-tRNA synthetase with a predicted role in tRNA charging for translation | location=ChrIV_A_nidulans_FGSC_A4:1667489-1669326(-) | protein_length=574 | sequence_SO=chromosome | SO…	27	337	14	14	0	574	65.1	6.11	2070	23017	199.75	0	72.708		2.16339e+08	2.96286e+08	2.59562e+08	2.64651e+08	2.59078e+08	3.00799e+08	2.35809e+08	1.7605e+08	2.00986e+08	2.16339e+08	2.72007e+08	1.75162e+08	1.44474e+08	1.06727e+08	1.28139e+08	1.33909e+08	9.60239e+07	9.32113e+07	9	13	13	11	11	12	13	12	12	High	High	High	High	High	High	High
AN5194-T-p1	transcript=AN5194-T | gene=AN5194 | organism=Aspergillus_nidulans_FGSC_A4 | gene_product=Ortholog(s) have endoplasmic reticulum, fungal-type vacuole membrane localization | transcript_product=Ortholog(s) have endoplasmic reticulum, fungal-type vacuole membrane localization | location=ChrV_A_nidulans_FGSC_A4:1450031-1453410(+) | protein_length=1091 | sequence_SO=chromosome | SO=protein_coding | is…	11	335	10	10	0	1091	120.2	5.71	2500	22863.1	222.03	0	53.991		8.83343e+07	5.42338e+07	7.7871e+07	1.01018e+08	6.78113e+07	6.44061e+07	7.75212e+07	6.06522e+07	3.70921e+07	8.83343e+07	4.97897e+07	5.25503e+07	5.5146e+07	2.79348e+07	2.74367e+07	4.40219e+07	3.30819e+07	1.72022e+07	6	10	7	9	8	9	7	7	7	High	High	High	High	High	High	High
AN1195-T-p1	transcript=AN1195-T | gene=AN1195 | organism=Aspergillus_nidulans_FGSC_A4 | gene_product=Ortholog(s) have role in calcium ion transport into cytosol and cytosol, plasma membrane localization | transcript_product=Ortholog(s) have role in calcium ion transport into cytosol and cytosol, plasma membrane localization | location=ChrVIII_A_nidulans_FGSC_A4:1230456-1231824(+) | protein_length=390 | seque…	24	334	9	9	0	390	44	7.21	1469	21051.2	213.38	0	45.29		8.38383e+07	2.78537e+07	2.92175e+07	5.16627e+07	4.80331e+07	6.80513e+07	8.18488e+07	6.33171e+07	3.79153e+07	8.38383e+07	2.55713e+07	1.97171e+07	2.82028e+07	1.97872e+07	2.89895e+07	4.64795e+07	3.45354e+07	1.7584e+07	9	8	8	8	7	6	8	8	6	High	High	High	High	High	High	High
AN2731-T-p1	transcript=AN2731-T | gene=AN2731 | organism=Aspergillus_nidulans_FGSC_A4 | gene_product=Ortholog(s) have ATPase activator activity, unfolded protein binding activity | transcript_product=Ortholog(s) have ATPase activator activity, unfolded protein binding activity | location=ChrVI_A_nidulans_FGSC_A4:2990579-2992010(+) | protein_length=412 | sequence_SO=chromosome | SO=protein_coding | is_pseudo=…	23	334	8	8	0	412	45.4	6.16	3200	23747.8	264.88	0	47.364		4.90876e+07	8.98395e+07	8.67138e+07	5.05206e+07	7.54634e+07	5.6274e+07	7.62948e+07	5.2217e+07	8.46216e+07	4.90876e+07	8.24778e+07	5.85178e+07	2.75793e+07	3.10871e+07	2.39725e+07	4.33255e+07	2.8481e+07	3.92449e+07	6	8	7	6	8	8	8	7	6	High	High	High	High	High	High	High
AN1345-T-p1	transcript=AN1345-T | gene=AN1345 | organism=Aspergillus_nidulans_FGSC_A4 | gene_product=Ortholog(s) have structural constituent of ribosome activity and role in maturation of SSU-rRNA from tricistronic rRNA transcript (SSU-rRNA, 5.8S rRNA, LSU-rRNA), regulation of translational fidelity | transcript_product=Ortholog(s) have structural constituent of ribosome activity and role in maturation of SS…	17	333	3	3	0	145	15.8	10.39	1050	14660.3	106.94	0	14.862		2.99728e+08	2.23832e+08	1.88548e+08	6.40581e+08	5.80743e+08	4.65941e+08	4.55312e+08	6.45304e+08	4.20882e+08	2.99728e+08	2.0549e+08	1.27239e+08	3.49695e+08	2.39237e+08	198488494	2.58558e+08	3.51971e+08	1.95192e+08	3	3	3	3	3	3	3	3	3	High	High	High	High	High	High	High
AN8744-T-p1	transcript=AN8744-T | gene=AN8744 | organism=Aspergillus_nidulans_FGSC_A4 | gene_product=Has domain(s) with predicted catalytic activity, oxidoreductase activity | transcript_product=Has domain(s) with predicted catalytic activity, oxidoreductase activity | location=ChrIII_A_nidulans_FGSC_A4:2946194-2947604(+) | protein_length=403 | sequence_SO=chromosome | SO=protein_coding | is_pseudo=false	20	332	8	8	0	403	43.8	5.81	2380	26931.6	262.24	0	48.335		6.59535e+07	1.04787e+08	9.90294e+07	1.4597e+08	1.45223e+08	1.44145e+08	1.38752e+08	1.26149e+08	1.09077e+08	6.59535e+07	9.62008e+07	6.68288e+07	7.96856e+07	5.98247e+07	6.14052e+07	7.87932e+07	6.88063e+07	5.05864e+07	8	8	7	8	8	7	8	6	7	High	High	High	High	High	High	High
AN1094-T-p1	transcript=AN1094-T | gene=AN1094 | organism=Aspergillus_nidulans_FGSC_A4 | gene_product=Putative mitochondrial NADH dehydrogenase (ubiquinone) with a predicted role in energy metabolism | transcript_product=Putative mitochondrial NADH dehydrogenase (ubiquinone) with a predicted role in energy metabolism | location=ChrVIII_A_nidulans_FGSC_A4:1539674-1541595(+) | protein_length=570 | sequence_SO=c…	26	331	15	15	0	570	64.4	9.17	1759	23389.8	203.31	0	81.388		6.75578e+07	3.9539e+07	3.35529e+07	5.81448e+07	7.41512e+07	6.07835e+07	5.92158e+07	3.38922e+07	5.59128e+07	6.75578e+07	3.6299e+07	2.26427e+07	3.17414e+07	3.05466e+07	2.58934e+07	3.36269e+07	1.8486e+07	2.59306e+07	11	9	8	14	12	10	10	12	13	High	High	High	High	High	High	High
AN5793-T-p1	transcript=AN5793-T | gene=AN5793 | organism=Aspergillus_nidulans_FGSC_A4 | gene_product=Putative 20S proteasome beta-type subunit | transcript_product=Putative 20S proteasome beta-type subunit | location=ChrV_A_nidulans_FGSC_A4:1692300-1693438(-) | protein_length=298 | sequence_SO=chromosome | SO=protein_coding | is_pseudo=false	38	330	12	12	0	298	31.8	5.21	2171	22760.3	239.93	0	76.037		4.99277e+07	6.20714e+07	9.73785e+07	2.15636e+08	9.28856e+07	7.23471e+07	8.31318e+07	7.5174e+07	9.90153e+07	4.99277e+07	5.69851e+07	6.57147e+07	1.17716e+08	3.82642e+07	3.08195e+07	4.7208e+07	4.10026e+07	4.59202e+07	9	8	7	10	10	12	11	9	9	High	High	High	High	High	High	High
AN1990-T-p1	transcript=AN1990-T | gene=AN1990 | organism=Aspergillus_nidulans_FGSC_A4 | gene_product=Putative homocitrate synthase with a predicted role in pyruvate metabolism | transcript_product=Putative homocitrate synthase with a predicted role in pyruvate metabolism | location=ChrVII_A_nidulans_FGSC_A4:2476884-2478496(-) | protein_length=463 | sequence_SO=chromosome | SO=protein_coding | is_pseudo=false	26	329	10	10	0	463	50.8	5.78	1822	27861.8	287.01	0	55.855		9.338e+07	9.96798e+07	5.84307e+07	5.37737e+07	7.00991e+07	5.08762e+07	4.62011e+07	1.27207e+07	3.26802e+07	9.338e+07	9.15117e+07	3.94313e+07	2.93552e+07	2.88773e+07	2.1673e+07	2.62362e+07	6.93833e+06	1.51561e+07	9	8	7	7	7	6	7	6	5	High	High	High	High	High	High	High
AN4396-T-p1	transcript=AN4396-T | gene=AN4396 | organism=Aspergillus_nidulans_FGSC_A4 | gene_product=Predicted Ras guanine nucleotide exchange factor (Ras GEF) | transcript_product=Predicted Ras guanine nucleotide exchange factor (Ras GEF) | location=ChrIII_A_nidulans_FGSC_A4:2161299-2162046(-) | protein_length=155 | sequence_SO=chromosome | SO=protein_coding | is_pseudo=false	32	329	3	3	0	155	17.1	9.2	2091	23003.7	255.21	0	30.419		1.53359e+07	1.6266e+07	1.34491e+07	1.94063e+07	1.74875e+07	2.86485e+07	3.14746e+07	2.18803e+07	3.02514e+07	1.53359e+07	1.49332e+07	9.07595e+06	1.0594e+07	7.20398e+06	1.22041e+07	1.78734e+07	1.19343e+07	1.40297e+07	3	3	3	3	3	3	3	2	3	High	High	High	High	High	High	High
AN6921-T-p1	transcript=AN6921-T | gene=AN6921 | organism=Aspergillus_nidulans_FGSC_A4 | gene_product=Ortholog(s) have chaperone binding activity, role in negative regulation of DNA binding, positive regulation of telomere maintenance via telomerase, protein folding, regulation of telomerase activity and cytosol, nucleus localization | transcript_product=Ortholog(s) have chaperone binding activity, role in ne…	40	326	5	5	0	210	23.4	4.54	2286	28046.4	253.09	0	58.371		2.25344e+07	2.52524e+07	3.3675e+07	3.46424e+07	2.74865e+07	5.02416e+07	1.57167e+07	2.13357e+07	4.01479e+07	2.25344e+07	2.31831e+07	2.27252e+07	1.89114e+07	1.1323e+07	2.14027e+07	8.92502e+06	1.16372e+07	1.86194e+07	6	4	4	5	5	5	2	3	4	High	High	High	High	High	High	High
AN5757-T-p1	transcript=AN5757-T | gene=AN5757 | organism=Aspergillus_nidulans_FGSC_A4 | gene_product=Putative casein kinase-type protein kinase | transcript_product=Putative casein kinase-type protein kinase | location=ChrV_A_nidulans_FGSC_A4:1789389-1790925(+) | protein_length=445 | sequence_SO=chromosome | SO=protein_coding | is_pseudo=false	27	325	10	10	0	445	49.7	9.48	2809	25171.4	229.61	0	47.334		1.70269e+07	1.41939e+07	2.2813e+07	3.1377e+07	4.01893e+07	2.89273e+07	2.76881e+07	4.20945e+07	6.28593e+07	1.70269e+07	1.30308e+07	1.53951e+07	1.71288e+07	1.6556e+07	1.23229e+07	1.57232e+07	2.29598e+07	2.91522e+07	6	8	7	9	7	7	8	7	7	High	High	High	High	High	High	High
AN8737-T-p1	transcript=AN8737-T | gene=AN8737 | organism=Aspergillus_nidulans_FGSC_A4 | gene_product=High-affinity glucose transporter active in hyphae under glucose-limiting conditions | transcript_product=High-affinity glucose transporter active in hyphae under glucose-limiting conditions | location=ChrIII_A_nidulans_FGSC_A4:2984047-2985912(+) | protein_length=527 | sequence_SO=chromosome | SO=protein_codi…	8	324	6	3	4	527	57.9	7.96	1373	18048.9	172.4	0	23.274		1.17071e+08	9.2007e+07	1.42181e+08	1.10795e+08	7.51231e+07	1.74158e+08	1.65424e+08	2.22349e+08	1.97781e+08	1.17071e+08	8.44677e+07	9.59494e+07	6.04833e+07	3.09469e+07	7.41904e+07	9.39394e+07	1.21277e+08	9.1725e+07	6	6	6	7	6	7	7	6	6	Peak Found	High	Peak Found	High	High	High	High
AN3983-T-p1	transcript=AN3983-T | gene=AN3983 | organism=Aspergillus_nidulans_FGSC_A4 | gene_product=Ortholog of Aspergillus wentii : Aspwe1_0168245, Aspergillus clavatus NRRL 1 : ACLA_062140 and Aspergillus aculeatus ATCC16872 : Aacu16872_043723 | transcript_product=Ortholog of Aspergillus wentii : Aspwe1_0168245, Aspergillus clavatus NRRL 1 : ACLA_062140 and Aspergillus aculeatus ATCC16872 : Aacu16872_0437…	29	324	4	4	0	139	15.2	4.91	5217	30883.7	312.15	0	33.79		4.93137e+07	1.89891e+07	1.72124e+07	4.01573e+07	4.14141e+07	6.49965e+07	3.52776e+07	3.84337e+07	5.54321e+07	4.93137e+07	1.7433e+07	1.16156e+07	2.1922e+07	1.70605e+07	2.76882e+07	2.00331e+07	2.09631e+07	2.57077e+07	4	3	3	4	4	4	4	4	4	High	High	High	High	High	High	High
AN1466-T-p1	transcript=AN1466-T | gene=AN1466 | organism=Aspergillus_nidulans_FGSC_A4 | gene_product=Ortholog(s) have chromatin binding activity, role in positive regulation of transcription elongation from RNA polymerase II promoter and NuA3b histone acetyltransferase complex, cytosol localization | transcript_product=Ortholog(s) have chromatin binding activity, role in positive regulation of transcription …	30	324	19	19	0	621	67.9	5.5	1540	22513.3	160.23	0	107.274		6.89703e+07	6.18089e+07	5.84246e+07	7.8653e+07	9.55979e+07	1.06262e+08	5.34969e+07	7.50897e+07	5.13488e+07	6.89703e+07	5.67441e+07	3.94271e+07	4.29369e+07	3.93815e+07	4.5267e+07	3.03793e+07	4.09565e+07	2.3814e+07	14	13	12	12	12	13	12	12	9	High	High	High	High	High	High	High
AN10743-T-p1	transcript=AN10743-T | gene=AN10743 | organism=Aspergillus_nidulans_FGSC_A4 | gene_product=Ortholog(s) have role in endocytosis, establishment or maintenance of actin cytoskeleton polarity, vacuole organization and integral component of Golgi membrane localization | transcript_product=Ortholog(s) have role in endocytosis, establishment or maintenance of actin cytoskeleton polarity, vacuole organi…	30	324	9	9	0	301	33.3	5.19	1926	23644.2	217.25	0	55.563		5.99389e+07	5.54447e+07	3.58599e+07	4.68921e+07	4.9765e+07	5.14359e+07	3.84992e+07	8.44287e+07	1.26127e+08	5.99389e+07	5.09014e+07	2.41996e+07	2.55985e+07	2.05007e+07	2.19114e+07	2.18625e+07	4.60504e+07	5.8494e+07	5	8	6	6	6	6	8	7	7	High	High	High	High	High	High	High
AN2080-T-p1	transcript=AN2080-T | gene=AN2080 | organism=Aspergillus_nidulans_FGSC_A4 | gene_product=Ortholog(s) have translation release factor activity, role in cytoplasmic translational termination and cytosolic ribosome, translation release factor complex localization | transcript_product=Ortholog(s) have translation release factor activity, role in cytoplasmic translational termination and cytosolic rib…	17	324	14	13	1	708	76.8	8.18	2422	21381.6	232.95	0	60.46		1.24859e+08	1.1521e+08	7.13663e+07	8.20044e+07	1.05005e+08	1.16155e+08	1.13385e+08	9.77906e+07	7.3898e+07	1.24859e+08	1.05769e+08	4.81607e+07	4.47664e+07	4.32569e+07	4.94814e+07	6.43878e+07	5.33384e+07	3.42716e+07	9	9	9	11	10	8	10	9	10	High	High	High	High	High	High	High
AN7269-T-p1	transcript=AN7269-T | gene=AN7269 | organism=Aspergillus_nidulans_FGSC_A4 | gene_product=Ortholog(s) have role in fumiquinazoline C biosynthetic process, secondary metabolite biosynthetic process and fungal-type cell wall localization | transcript_product=Ortholog(s) have role in fumiquinazoline C biosynthetic process, secondary metabolite biosynthetic process and fungal-type cell wall localizati…	24	323	6	6	0	474	51.1	4.64	2090	22988.2	253.25	0	57.209		3.40816e+07	3.06144e+07	3.17719e+07	3.89408e+07	4.82605e+07	3.87954e+07	3.78872e+07	3.05798e+07	1.26107e+07	3.40816e+07	2.81057e+07	2.14409e+07	2.12579e+07	1.98809e+07	1.65266e+07	2.1515e+07	1.66793e+07	5.84847e+06	6	4	5	5	5	5	5	4	5	High	High	High	High	High	High	High
AN6669-T-p1	transcript=AN6669-T | gene=AN6669 | organism=Aspergillus_nidulans_FGSC_A4 | gene_product=High-affinity glucose transporter active in germinating conidia | transcript_product=High-affinity glucose transporter active in germinating conidia | location=ChrI_A_nidulans_FGSC_A4:2787118-2788906(-) | protein_length=534 | sequence_SO=chromosome | SO=protein_coding | is_pseudo=false	9	323	5	2	0	534	58.6	6.16	1153	17379.5	183.76	0	20.846		74162.3	3.72914e+06			318167	186806			1.21043e+07	74162.3	3.42356e+06			131069	79578.4			5.6136e+06	1	1			1	1			1	Peak Found	High	Peak Found	Peak Found	High	High	Peak Found
AN7334-T-p1	transcript=AN7334-T | gene=AN7334 | organism=Aspergillus_nidulans_FGSC_A4 | gene_product=Has domain(s) with predicted catalytic activity and role in metabolic process | transcript_product=Has domain(s) with predicted catalytic activity and role in metabolic process | location=ChrIV_A_nidulans_FGSC_A4:274514-278077(-) | protein_length=1124 | sequence_SO=chromosome | SO=protein_coding | is_pseudo=f…	19	323	20	20	0	1124	125.3	6.79	1586	20143.7	181.68	0	84.447		1.13104e+08	1.54022e+08	1.83126e+08	1.4021e+08	1.22121e+08	1.18635e+08	1.32999e+08	9.97919e+07	1.77621e+08	1.13104e+08	1.41401e+08	1.23581e+08	7.65409e+07	5.03078e+07	5.05378e+07	7.55258e+07	5.443e+07	8.23753e+07	14	14	13	14	12	12	13	12	12	High	High	High	High	High	High	High
AN0574-T-p1	transcript=AN0574-T | gene=AN0574 | organism=Aspergillus_nidulans_FGSC_A4 | gene_product=Ortholog(s) have glyoxysome localization | transcript_product=Ortholog(s) have glyoxysome localization | location=ChrVIII_A_nidulans_FGSC_A4:3126482-3127558(-) | protein_length=314 | sequence_SO=chromosome | SO=protein_coding | is_pseudo=false	32	322	8	8	0	314	32.8	8.79	2298	23392.8	276.25	0	55.211		2.95893e+07	2.15036e+07	2.35424e+07	2.51838e+07	2.69229e+07	2.61318e+07	2.23459e+07	2.68401e+07	8.08116e+07	2.95893e+07	1.97415e+07	1.58873e+07	1.37479e+07	1.10909e+07	1.1132e+07	1.26896e+07	1.46395e+07	3.74779e+07	7	5	6	7	7	6	5	6	7	High	High	High	High	High	High	High
AN4452-T-p1	transcript=AN4452-T | gene=AN4452 | organism=Aspergillus_nidulans_FGSC_A4 | gene_product=Has domain(s) with predicted structural constituent of ribosome activity, role in translation and ribosome localization | transcript_product=Has domain(s) with predicted structural constituent of ribosome activity, role in translation and ribosome localization | location=ChrIII_A_nidulans_FGSC_A4:2010940-2013…	10	322	6	6	0	396	44.9	10.17	1644	19160.8	218.33	0	23.143		2.85409e+08	4.64081e+08	5.38755e+08	4.84988e+08	5.22165e+08	5.86232e+08	6.52997e+08	7.81556e+08	8.99674e+08	2.85409e+08	4.26053e+08	3.63573e+08	2.64756e+08	2.15106e+08	2.49732e+08	3.70817e+08	4.26288e+08	4.17241e+08	3	5	6	5	5	6	5	6	6	High	High	High	High	High	High	High
AN2047-T-p1	transcript=AN2047-T | gene=AN2047 | organism=Aspergillus_nidulans_FGSC_A4 | gene_product=Calmodulin | transcript_product=Calmodulin | location=ChrVII_A_nidulans_FGSC_A4:2692821-2693663(-) | protein_length=149 | sequence_SO=chromosome | SO=protein_coding | is_pseudo=false	40	322	7	7	0	149	17	4.27	4445	28409.7	257.22	0	56.286	Acetyl [N-Term]	2.08018e+08	2.3575e+08	1.00835e+08	1.17546e+08	1.91899e+08	1.89205e+08	1.15842e+08	3.6302e+07	4.43391e+07	2.08018e+08	2.16432e+08	6.80472e+07	6.41688e+07	7.90526e+07	8.06003e+07	6.5783e+07	1.98004e+07	2.05631e+07	8	8	7	8	8	8	7	6	5	High	High	High	High	High	High	High
AN6985-T-p1	transcript=AN6985-T | gene=AN6985 | organism=Aspergillus_nidulans_FGSC_A4 | gene_product=Putative ribulokinase with a predicted role in ribulose metabolism | transcript_product=Putative ribulokinase with a predicted role in ribulose metabolism | location=ChrIV_A_nidulans_FGSC_A4:1396572-1398516(-) | protein_length=612 | sequence_SO=chromosome | SO=protein_coding | is_pseudo=false	26	321	12	12	0	612	66.8	5.17	3852	27803.9	274.16	0	77.414		1.01702e+08	1.77701e+07	1.99721e+07	4.45618e+07	4.01572e+07	3.70456e+07	3.0063e+07	2.13426e+07	4.49412e+07	1.01702e+08	1.6314e+07	1.34779e+07	2.43264e+07	1.65428e+07	1.57813e+07	1.70718e+07	1.1641e+07	2.08423e+07	7	4	6	9	8	8	6	6	7	High	High	High	High	High	High	High
AN0893-T-p1	transcript=AN0893-T | gene=AN0893 | organism=Aspergillus_nidulans_FGSC_A4 | gene_product=Putative adenylosuccinate synthase with a predicted role in purine metabolism | transcript_product=Putative adenylosuccinate synthase with a predicted role in purine metabolism | location=ChrVIII_A_nidulans_FGSC_A4:2142516-2143922(-) | protein_length=424 | sequence_SO=chromosome | SO=protein_coding | is_pseud…	19	321	7	7	0	424	46.4	6.84	3805	27970.7	306.69	0	40.8		5.424e+07	1.34881e+08	1.06589e+08	5.09984e+07	9.47509e+07	5.68644e+07	8.06279e+07	9.87353e+07	5.84622e+07	5.424e+07	1.23828e+08	7.19305e+07	2.78402e+07	3.90326e+07	2.42239e+07	4.57861e+07	5.38537e+07	2.7113e+07	5	7	7	6	7	6	6	7	5	High	High	High	High	High	High	High
AN11278-T-p1	transcript=AN11278-T | gene=AN11278 | organism=Aspergillus_nidulans_FGSC_A4 | gene_product=Ortholog(s) have role in cristae formation and MICOS complex, mitochondrial crista junction localization | transcript_product=Ortholog(s) have role in cristae formation and MICOS complex, mitochondrial crista junction localization | location=ChrVIII_A_nidulans_FGSC_A4:2870070-2870548(+) | protein_length=91 …	46	320	4	4	0	91	10.1	10.68	2623	21855.7	243.6	0	17.705		3.24493e+07	8.82677e+06	1.81674e+07	5.10255e+07	4.43703e+07	4.37994e+07	3.10363e+07	7.17468e+07	4.18991e+07	3.24493e+07	8.10348e+06	1.226e+07	2.78549e+07	1.82783e+07	1.86583e+07	1.76246e+07	3.91332e+07	1.94315e+07	2	2	2	3	3	2	3	3	3	High	High	High	High	High	High	High
AN0347-T-p1	transcript=AN0347-T | gene=AN0347 | organism=Aspergillus_nidulans_FGSC_A4 | gene_product=Putative GTPase with a predicted role in intra-Golgi transport | transcript_product=Putative GTPase with a predicted role in intra-Golgi transport | location=ChrVIII_A_nidulans_FGSC_A4:3838052-3838855(+) | protein_length=210 | sequence_SO=chromosome | SO=protein_coding | is_pseudo=false	34	319	7	7	0	210	23.4	5.49	2266	20173.9	217.46	0	33.259		2.15904e+08	2.11211e+08	2.33861e+08	2.06848e+08	1.95945e+08	2.68236e+08	2.1245e+08	2.59687e+08	2.49281e+08	2.15904e+08	1.93904e+08	1.57818e+08	1.12919e+08	8.07195e+07	1.14267e+08	1.20644e+08	1.41642e+08	1.15609e+08	6	5	6	5	6	7	5	6	5	High	High	High	High	High	High	High
AN3581-T-p1	transcript=AN3581-T | gene=AN3581 | organism=Aspergillus_nidulans_FGSC_A4 | gene_product=Thioredoxin reductase with a predicted role in pyrimidine metabolism | transcript_product=Thioredoxin reductase with a predicted role in pyrimidine metabolism | location=ChrII_A_nidulans_FGSC_A4:3701106-3702210(+) | protein_length=339 | sequence_SO=chromosome | SO=protein_coding | is_pseudo=false	29	318	7	7	0	339	36.1	5.34	3779	27258.5	278.68	0	51.276		4.04098e+07	1.43518e+07	1.61925e+07	8.59497e+07	6.06663e+07	2.97568e+07	4.18798e+07	1.42238e+07	2.49669e+07	4.04098e+07	1.31758e+07	1.09273e+07	4.69202e+07	2.49915e+07	1.26762e+07	2.37823e+07	7.75816e+06	1.15789e+07	6	6	6	6	5	5	6	5	6	High	High	High	High	High	High	High
AN7602-T-p1	transcript=AN7602-T | gene=AN7602 | organism=Aspergillus_nidulans_FGSC_A4 | gene_product=Putative GTPase with a role in retrograde traffic from endosomes to the Golgi | transcript_product=Putative GTPase with a role in retrograde traffic from endosomes to the Golgi | location=ChrIV_A_nidulans_FGSC_A4:2107147-2108042(-) | protein_length=209 | sequence_SO=chromosome | SO=protein_coding | is_pseudo=…	31	318	6	5	0	209	23.3	7.14	1912	22286.5	245.81	0	26.868		9.656e+06	1.54096e+07	1.48789e+07	2.72829e+07	2.60712e+07	2.37477e+07	2.72136e+07	2.70953e+07	1.49199e+07	9.656e+06	1.41469e+07	1.00408e+07	1.48938e+07	1.074e+07	1.01164e+07	1.54538e+07	1.47787e+07	6.9194e+06	5	5	5	5	5	4	4	5	4	High	High	High	High	High	High	High
AN7143-T-p1	transcript=AN7143-T | gene=AN7143 | organism=Aspergillus_nidulans_FGSC_A4 | gene_product=Ortholog(s) have cytosol localization | transcript_product=Ortholog(s) have cytosol localization | location=ChrIV_A_nidulans_FGSC_A4:867698-869175(+) | protein_length=447 | sequence_SO=chromosome | SO=protein_coding | is_pseudo=false	29	318	13	13	0	447	51.5	8.56	2498	22385.4	184.84	0	59.21		6.3952e+07	2.61392e+07	2.59473e+07	4.44612e+07	8.07289e+07	3.85045e+07	3.84898e+07	3.28147e+07	6.68583e+07	6.3952e+07	2.39973e+07	1.75102e+07	2.42715e+07	3.32563e+07	1.64027e+07	2.18572e+07	1.78983e+07	3.10068e+07	11	9	9	9	10	11	8	7	9	High	High	High	High	High	High	High
AN8054-T-p1	transcript=AN8054-T | gene=AN8054 | organism=Aspergillus_nidulans_FGSC_A4 | gene_product=Predicted alpha 4 subunit of the 20S core proteasome | transcript_product=Predicted alpha 4 subunit of the 20S core proteasome | location=ChrII_A_nidulans_FGSC_A4:614120-615001(-) | protein_length=246 | sequence_SO=chromosome | SO=protein_coding | is_pseudo=false	55	317	11	11	0	246	27	8.34	1770	20235.2	198.84	0	60.403		4.22991e+07	8.6512e+07	1.6124e+08	1.50889e+08	1.85301e+08	1.59935e+08	8.10887e+07	1.14195e+08	7.28244e+07	4.22991e+07	7.94229e+07	1.08811e+08	8.23709e+07	7.63347e+07	6.81315e+07	4.60478e+07	6.2286e+07	3.37737e+07	8	7	8	10	10	10	8	7	6	High	High	High	High	High	High	High
AN4762-T-p1	transcript=AN4762-T | gene=AN4762 | organism=Aspergillus_nidulans_FGSC_A4 | gene_product=Ortholog(s) have mitochondrion localization | transcript_product=Ortholog(s) have mitochondrion localization | location=ChrIII_A_nidulans_FGSC_A4:1074903-1075604(+) | protein_length=144 | sequence_SO=chromosome | SO=protein_coding | is_pseudo=false	42	316	6	6	0	144	16.3	9.31	2691	22075.5	211.56	0	44.418		1.08813e+08	6.10985e+07	7.85882e+07	1.1892e+08	1.21555e+08	1.50701e+08	1.15953e+08	1.55811e+08	2.88586e+08	1.08813e+08	5.60919e+07	5.30343e+07	6.4919e+07	5.00745e+07	6.41977e+07	6.58462e+07	8.49846e+07	1.33837e+08	6	6	6	7	6	6	7	6	6	High	High	High	High	High	High	High
AN3629-T-p1	transcript=AN3629-T | gene=AN3629 | organism=Aspergillus_nidulans_FGSC_A4 | gene_product=Ortholog(s) have oxidized purine nucleobase lesion DNA N-glycosylase activity | transcript_product=Ortholog(s) have oxidized purine nucleobase lesion DNA N-glycosylase activity | location=ChrII_A_nidulans_FGSC_A4:3543636-3544777(-) | protein_length=363 | sequence_SO=chromosome | SO=protein_coding | is_pseudo=…	25	316	10	10	0	363	41.5	9.2	2530	24071.4	150.46	0	51.067		8.42528e+07	9.64474e+07	4.5075e+07	1.00212e+08	8.80534e+07	6.39891e+07	6.82247e+07	4.19014e+07	5.85382e+07	8.42528e+07	8.85442e+07	3.04183e+07	54705766	3.62736e+07	2.7259e+07	3.87427e+07	2.28545e+07	2.71482e+07	8	8	7	7	7	7	7	5	5	High	High	High	High	High	High	High
AN2295-T-p1	transcript=AN2295-T | gene=AN2295 | organism=Aspergillus_nidulans_FGSC_A4 | gene_product=Putative succinate-CoA ligase (GDP-forming) with a predicted role in the TCA cycle | transcript_product=Putative succinate-CoA ligase (GDP-forming) with a predicted role in the TCA cycle | location=ChrVII_A_nidulans_FGSC_A4:3472950-3474318(+) | protein_length=329 | sequence_SO=chromosome | SO=protein_coding |…	12	314	4	4	0	329	34.3	8.41	788	17972.6	84.78	0	37.72		1.19068e+08	1.28187e+08	3.37521e+07	1.09766e+08	6.62039e+07	1.02963e+08	9.31696e+07	3.08756e+07	4.56741e+07	1.19068e+08	1.17683e+08	2.27772e+07	5.99215e+07	2.72727e+07	4.38616e+07	5.29082e+07	1.68406e+07	2.11823e+07	6	4	5	6	5	6	6	5	4	High	High	High	High	High	High	High
AN3789-T-p1	transcript=AN3789-T | gene=AN3789 | organism=Aspergillus_nidulans_FGSC_A4 | gene_product=Ortholog(s) have cytosol, nucleus localization | transcript_product=Ortholog(s) have cytosol, nucleus localization | location=ChrII_A_nidulans_FGSC_A4:3053412-3054617(-) | protein_length=366 | sequence_SO=chromosome | SO=protein_coding | is_pseudo=false	30	313	7	7	0	366	39.9	6.42	3205	29719.2	316.52	0	65.846		5.66173e+07	7.77967e+07	2.16212e+07	1.79691e+07	1.86874e+07	1.66062e+07	5.04343e+06	1.72563e+07	3.20763e+07	5.66173e+07	7.14218e+07	1.45908e+07	9.80939e+06	7.69827e+06	7.07417e+06	2.86401e+06	9.41218e+06	1.4876e+07	5	5	4	5	5	5	5	4	5	High	High	High	High	High	High	High
AN5341-T-p1	transcript=AN5341-T | gene=AN5341 | organism=Aspergillus_nidulans_FGSC_A4 | gene_product=Ortholog(s) have 1-phosphatidylinositol 4-kinase activator activity, calcium ion binding activity | transcript_product=Ortholog(s) have 1-phosphatidylinositol 4-kinase activator activity, calcium ion binding activity | location=ChrV_A_nidulans_FGSC_A4:3096123-3097016(-) | protein_length=190 | sequence_SO=chro…	34	311	7	7	0	190	22	4.89	2425	18679.8	207.55	0	36.163		3.96295e+07	5.94513e+07	9.93011e+07	5.42405e+07	6.661e+07	7.48311e+07	7.20015e+07	1.08399e+08	4.84016e+07	3.96295e+07	5.45796e+07	6.70121e+07	2.96101e+07	2.744e+07	3.18776e+07	4.08874e+07	5.91248e+07	2.24472e+07	5	5	6	5	6	7	6	6	5	High	High	High	High	High	High	High
AN3026-T-p1	transcript=AN3026-T | gene=AN3026 | organism=Aspergillus_nidulans_FGSC_A4 | gene_product=Alpha-COP coatamer-related protein involved in the establishment and maintenance of polarized growth | transcript_product=Alpha-COP coatamer-related protein involved in the establishment and maintenance of polarized growth | location=ChrVI_A_nidulans_FGSC_A4:2068223-2072274(-) | protein_length=1211 | sequence…	17	311	19	19	0	1211	135.2	6.19	1170	19751	180.31	0	92.323		5.76221e+07	4.47784e+07	8.7679e+07	8.8613e+07	3.25054e+07	2.97246e+07	5.39451e+07	5.11945e+07	3.16436e+07	5.76221e+07	4.11091e+07	5.91691e+07	4.83741e+07	1.33906e+07	1.26625e+07	3.06338e+07	2.79233e+07	1.46753e+07	13	14	16	14	13	11	10	12	11	High	High	High	High	High	High	High
AN6903-T-p1	transcript=AN6903-T | gene=AN6903 | organism=Aspergillus_nidulans_FGSC_A4 | gene_product=Ortholog(s) have U1 snRNP, cytosol localization | transcript_product=Ortholog(s) have U1 snRNP, cytosol localization | location=ChrI_A_nidulans_FGSC_A4:3522422-3523698(-) | protein_length=373 | sequence_SO=chromosome | SO=protein_coding | is_pseudo=false	29	311	9	9	0	373	42	10.15	2412	24534.5	231.6	0	44.351		4.80291e+07	2.29683e+08	5.34527e+07	5.35183e+07	6.23384e+07	5.62283e+07	4.42206e+07	3.92969e+07	3.01626e+07	4.80291e+07	2.10862e+08	3.60719e+07	2.92158e+07	2.56803e+07	2.3953e+07	2.51115e+07	2.14339e+07	1.39885e+07	7	8	8	8	8	7	7	7	7	High	High	High	High	High	High	High
AN10718-T-p1	transcript=AN10718-T | gene=AN10718 | organism=Aspergillus_nidulans_FGSC_A4 | gene_product=6,7-mimethyl-8-ribityl-lumazine synthase | transcript_product=6,7-mimethyl-8-ribityl-lumazine synthase | location=ChrV_A_nidulans_FGSC_A4:1691375-1692146(+) | protein_length=207 | sequence_SO=chromosome | SO=protein_coding | is_pseudo=false	26	309	3	3	0	207	21.5	6.19	4084	28244	303.43	0	34.217		4.51266e+07	2.93921e+07	2.5868e+07	2.72353e+07	3.20391e+07	2.8317e+07	4.07962e+07	5.20783e+07	3.68403e+07	4.51266e+07	2.69836e+07	1.74567e+07	1.48678e+07	1.31985e+07	1.20629e+07	2.3167e+07	2.84053e+07	1.70854e+07	4	3	4	2	3	2	3	3	4	High	High	High	High	High	High	High
AN2989-T-p1	transcript=AN2989-T | gene=AN2989 | organism=Aspergillus_nidulans_FGSC_A4 | gene_product=Ortholog(s) have intracellular localization | transcript_product=Ortholog(s) have intracellular localization | location=ChrVI_A_nidulans_FGSC_A4:2162431-2163094(+) | protein_length=118 | sequence_SO=chromosome | SO=protein_coding | is_pseudo=false	26	308	3	3	0	118	12.6	8.57	2648	23247.9	220.95	0	12.807		6.42217e+07	8.31578e+07	1.19253e+08	1.04546e+08	1.93509e+08	1.50252e+08	1.18448e+08	1.06614e+08	1.22325e+08	6.42217e+07	7.63436e+07	8.04762e+07	5.70718e+07	7.97159e+07	6.40065e+07	6.72629e+07	5.81509e+07	5.67306e+07	3	3	3	3	3	3	3	3	3	High	High	High	High	High	High	High
AN3706-T-p1	transcript=AN3706-T | gene=AN3706 | organism=Aspergillus_nidulans_FGSC_A4 | gene_product=S. cerevisiae ortholog RPS10A has role in rRNA export from nucleus | transcript_product=S. cerevisiae ortholog RPS10A has role in rRNA export from nucleus | location=ChrII_A_nidulans_FGSC_A4:3320973-3321661(-) | protein_length=153 | sequence_SO=chromosome | SO=protein_coding | is_pseudo=false	30	307	6	6	0	153	17.6	9.82	2185	22796.5	228.85	0	26.059		2.07009e+08	1.13951e+08	1.31538e+08	1.57054e+08	1.53021e+08	2.12319e+08	1.25733e+08	1.77315e+08	2.41562e+08	2.07009e+08	1.04613e+08	8.87668e+07	8.57362e+07	6.30369e+07	9.04467e+07	7.13999e+07	9.67136e+07	1.12029e+08	7	7	7	7	7	7	7	7	5	High	High	High	High	High	High	High
AN1152-T-p1	transcript=AN1152-T | gene=AN1152 | organism=Aspergillus_nidulans_FGSC_A4 | gene_product=Protein expressed at decreased levels in a hapX mutant versus wild-type | transcript_product=Protein expressed at decreased levels in a hapX mutant versus wild-type | location=ChrVIII_A_nidulans_FGSC_A4:1371251-1372185(-) | protein_length=168 | sequence_SO=chromosome | SO=protein_coding | is_pseudo=false	10	305	2	2	0	168	18.3	5.8	622	10478.7	31.36	0	8.141		1.52929e+08	1.04295e+07	1.23345e+07	9.30716e+07	3.59322e+07	1.43269e+07	379673	3.97201e+06	3.44345e+06	1.52929e+08	9.57488e+06	8.32376e+06	50808031	14802275	6.10318e+06	215605	2.16647e+06	1.59697e+06	1	2	1	1	2	2	1	1	2	High	High	High	High	High	High	High
AN5918-T-p1	transcript=AN5918-T | gene=AN5918 | organism=Aspergillus_nidulans_FGSC_A4 | gene_product=Putative catalase with a predicted role in gluconic acid and gluconate metabolism | transcript_product=Putative catalase with a predicted role in gluconic acid and gluconate metabolism | location=ChrI_A_nidulans_FGSC_A4:1816321-1817926(-) | protein_length=501 | sequence_SO=chromosome | SO=protein_coding | is_…	28	304	13	13	0	501	57.1	8.09	2258	18724.9	185.82	0	57.893		1.02053e+08	6.0421e+07	1.04594e+08	2.59107e+08	2.39231e+08	3.44297e+08	1.89286e+08	3.46735e+08	3.03243e+08	1.02053e+08	5.547e+07	7.05839e+07	1.41447e+08	9.85511e+07	1.46669e+08	1.0749e+08	1.89121e+08	1.40635e+08	11	9	8	11	13	11	9	10	8	High	High	High	High	High	High	High
AN0943-T-p1	transcript=AN0943-T | gene=AN0943 | organism=Aspergillus_nidulans_FGSC_A4 | gene_product=Putative mitochondrial F1F0-ATP synthase subunit g | transcript_product=Putative mitochondrial F1F0-ATP synthase subunit g | location=ChrVIII_A_nidulans_FGSC_A4:2001044-2001878(-) | protein_length=196 | sequence_SO=chromosome | SO=protein_coding | is_pseudo=false	29	304	5	5	0	196	20.7	11.18	3135	23841.4	293.4	0	37.076		2.06205e+08	8.84047e+07	1.19592e+08	8.42821e+07	9.41123e+07	9.87913e+07	1.29553e+08	1.27606e+08	2.49144e+08	2.06205e+08	8.11605e+07	8.07056e+07	4.60098e+07	3.87695e+07	4.20846e+07	7.35695e+07	6.9601e+07	1.15546e+08	3	4	4	4	4	4	4	4	4	High	High	High	High	High	High	High
AN10087-T-p1	transcript=AN10087-T | gene=AN10087 | organism=Aspergillus_nidulans_FGSC_A4 | gene_product=PASA transcript | transcript_product=PASA transcript | location=ChrVIII_A_nidulans_FGSC_A4:3617311-3618327(-) | protein_length=258 | sequence_SO=chromosome | SO=protein_coding | is_pseudo=false	33	303	6	6	0	258	28.4	4.67	2101	19972.5	160.45	0	31.486		9.38682e+07	4.05318e+07	4.10386e+07	3.31976e+07	5.46164e+07	3.20993e+07	6.36407e+07	7.23421e+07	3.27097e+07	9.38682e+07	3.72105e+07	2.76944e+07	1.81227e+07	2.24992e+07	1.36742e+07	3.61396e+07	3.94579e+07	1.51697e+07	3	3	3	4	4	3	4	4	4	High	High	High	High	High	High	High
AN4207-T-p1	transcript=AN4207-T | gene=AN4207 | organism=Aspergillus_nidulans_FGSC_A4 | gene_product=Ortholog(s) have role in endosomal transport, vesicle-mediated transport and AP-1 adaptor complex, endosome localization | transcript_product=Ortholog(s) have role in endosomal transport, vesicle-mediated transport and AP-1 adaptor complex, endosome localization | location=ChrII_A_nidulans_FGSC_A4:1746312-174…	17	303	10	10	0	839	92.6	6.46	1438	20352.3	198.59	0	52.225		8.08118e+07	2.02581e+07	2.40165e+07	3.01244e+07	4.21203e+07	3.4474e+07	2.73264e+07	5.71913e+07	3.72129e+07	8.08118e+07	1.85981e+07	1.62072e+07	1.6445e+07	1.73514e+07	1.46857e+07	1.55178e+07	3.11941e+07	1.72582e+07	8	10	9	8	9	9	7	9	10	High	High	High	High	High	High	High
AN4915-T-p1	transcript=AN4915-T | gene=AN4915 | organism=Aspergillus_nidulans_FGSC_A4 | gene_product=Putative RAB family GTPase | transcript_product=Putative RAB family GTPase | location=ChrIII_A_nidulans_FGSC_A4:564357-565307(-) | protein_length=258 | sequence_SO=chromosome | SO=protein_coding | is_pseudo=false	48	303	8	7	1	258	27.1	4.83	3695	27084.1	263.73	0	71.558		3.32375e+07	3.58515e+07	5.92091e+07	8.64963e+07	1.13182e+08	1.16378e+08	1.19153e+08	1.24301e+08	1.51621e+08	3.32375e+07	3.29137e+07	3.99566e+07	4.72186e+07	4.66254e+07	4.95762e+07	6.76634e+07	6.7798e+07	7.03171e+07	6	7	6	6	6	5	6	5	7	High	High	High	High	High	High	High
AN7436-T-p1	transcript=AN7436-T | gene=AN7436 | organism=Aspergillus_nidulans_FGSC_A4 | gene_product=Putative protein disulfide isomerase | transcript_product=Putative protein disulfide isomerase | location=ChrIV_A_nidulans_FGSC_A4:1536543-1538288(-) | protein_length=513 | sequence_SO=chromosome | SO=protein_coding | is_pseudo=false	23	302	10	10	0	513	55.8	4.64	1578	19950.7	193.53	0	56.055		2.78971e+07	6.2805e+07	1.06832e+08	8.3148e+07	8.43437e+07	8.9094e+07	8.51215e+07	8.77126e+07	1.11605e+08	2.78971e+07	5.76585e+07	7.20944e+07	4.53907e+07	3.47454e+07	3.79536e+07	4.83379e+07	4.78415e+07	5.17588e+07	8	10	10	9	8	8	7	10	10	High	High	High	High	High	High	High
AN8280-T-p1	transcript=AN8280-T | gene=AN8280 | organism=Aspergillus_nidulans_FGSC_A4 | gene_product=Putative long-chain-fatty-acid-CoA ligase with a predicted role in fatty acid metabolism | transcript_product=Putative long-chain-fatty-acid-CoA ligase with a predicted role in fatty acid metabolism | location=ChrII_A_nidulans_FGSC_A4:1367401-1369685(+) | protein_length=708 | sequence_SO=chromosome | SO=prote…	23	302	12	12	0	708	77.8	8.41	1725	17399.2	154.56	0	64.084		6.939e+07	2.46851e+07	1.83484e+07	2.64779e+07	3.96914e+07	4.74309e+07	4.13986e+07	1.90523e+07	5.91075e+07	6.939e+07	2.26623e+07	1.23822e+07	1.44544e+07	1.63509e+07	2.02053e+07	2.3509e+07	1.03918e+07	2.74122e+07	9	7	7	11	10	7	7	9	10	High	High	High	High	High	High	High
AN4547-T-p1	transcript=AN4547-T | gene=AN4547 | organism=Aspergillus_nidulans_FGSC_A4 | gene_product=Ortholog(s) have role in establishment or maintenance of cell polarity and cytosol localization | transcript_product=Ortholog(s) have role in establishment or maintenance of cell polarity and cytosol localization | location=ChrIII_A_nidulans_FGSC_A4:1691097-1694126(-) | protein_length=917 | sequence_SO=chromo…	15	301	14	14	0	917	100.6	5.55	2664	21658.9	185.82	0	61.767		9.76552e+08	3.69242e+07	4.60114e+07	5.01384e+07	4.98659e+07	4.54863e+07	3.86757e+07	3.51846e+07	3.84264e+07	9.76552e+08	3.38985e+07	3.10502e+07	2.73707e+07	2.05423e+07	1.93769e+07	2.19628e+07	1.91909e+07	1.7821e+07	12	9	9	9	12	9	8	8	8	High	High	High	High	High	High	High
AN3167-T-p1	transcript=AN3167-T | gene=AN3167 | organism=Aspergillus_nidulans_FGSC_A4 | gene_product=Putative ribosome biogenesis protein | transcript_product=Putative ribosome biogenesis protein | location=ChrVI_A_nidulans_FGSC_A4:1604681-1606594(+) | protein_length=586 | sequence_SO=chromosome | SO=protein_coding | is_pseudo=false	26	301	12	12	0	586	63.7	7.59	2010	21423.4	197.64	0	76.312		4.83987e+07	3.60309e+07	3.97833e+07	4.34316e+07	4.13215e+07	4.83867e+07	2.74162e+07	1.06623e+07	2.16294e+07	4.83987e+07	3.30784e+07	2.68473e+07	2.37094e+07	1.70224e+07	2.06125e+07	1.55688e+07	5.81562e+06	1.0031e+07	10	10	6	9	9	10	11	8	8	High	High	High	High	High	High	High
AN2302-T-p1	transcript=AN2302-T | gene=AN2302 | organism=Aspergillus_nidulans_FGSC_A4 | gene_product=Skp1-related protein with a predicted role in sulfur metabolism | transcript_product=Skp1-related protein with a predicted role in sulfur metabolism | location=ChrVII_A_nidulans_FGSC_A4:3495316-3496040(-) | protein_length=161 | sequence_SO=chromosome | SO=protein_coding | is_pseudo=false	47	299	8	8	0	161	18.6	4.6	1833	22705.9	237.9	0	53.335		5.71472e+07	4.4397e+07	8.71568e+07	5.41504e+07	8.97711e+07	1.18161e+08	6.48325e+07	6.53252e+07	3.89065e+07	5.71472e+07	4.0759e+07	5.88167e+07	2.95609e+07	3.69812e+07	5.03358e+07	3.68164e+07	3.56307e+07	1.80436e+07	6	8	8	8	7	8	8	8	7	High	High	High	High	High	High	High
AN12360-T-p1	transcript=AN12360-T | gene=AN12360 | organism=Aspergillus_nidulans_FGSC_A4 | gene_product=Has domain(s) with predicted role in response to stress | transcript_product=Has domain(s) with predicted role in response to stress | location=ChrI_A_nidulans_FGSC_A4:813817-816057(+) | protein_length=685 | sequence_SO=chromosome | SO=protein_coding | is_pseudo=false	19	298	11	11	0	685	73.4	9.14	1990	20267.6	147.16	0	70.553		1.09704e+08	1.81508e+08	1.69479e+08	1.10425e+08	1.82876e+08	2.2146e+08	8.56797e+07	9.21426e+07	2.35712e+08	1.09704e+08	1.66634e+08	1.14371e+08	6.02815e+07	7.53358e+07	9.43409e+07	4.86549e+07	5.02578e+07	1.09316e+08	10	10	10	9	9	9	10	9	7	High	High	High	High	High	High	High
AN4951-T-p1	transcript=AN4951-T | gene=AN4951 | organism=Aspergillus_nidulans_FGSC_A4 | gene_product=Ortholog(s) have protein transporter activity and role in intracellular protein transport, protein retention in Golgi apparatus, retrograde transport, endosome to Golgi | transcript_product=Ortholog(s) have protein transporter activity and role in intracellular protein transport, protein retention in Golgi ap…	25	298	17	17	0	866	98.7	5.81	1735	18904.3	199.07	0	75.777	Acetyl [N-Term]	3.33732e+07	5.101e+07	7.33427e+07	1.22217e+08	1.02668e+08	1.16426e+08	1.02568e+08	1.22049e+08	5.18747e+07	3.33732e+07	4.68301e+07	4.94944e+07	6.67184e+07	4.2294e+07	4.9597e+07	5.82451e+07	6.65696e+07	2.40579e+07	9	8	6	10	10	12	11	11	8	High	High	High	High	High	High	High
AN5128-T-p1	transcript=AN5128-T | gene=AN5128 | organism=Aspergillus_nidulans_FGSC_A4 | gene_product=Ortholog of A. fumigatus Af293 : Afu1g07430, A. niger CBS 513.88 : An07g09970, A. oryzae RIB40 : AO090012000994, Neosartorya fischeri NRRL 181 : NFIA_017320 and Aspergillus wentii : Aspwe1_0069020 | transcript_product=Ortholog of A. fumigatus Af293 : Afu1g07430, A. niger CBS 513.88 : An07g09970, A. oryzae RIB…	49	297	3	3	0	115	12.6	3.98	2358	25414.8	154.33	0	34.962	Acetyl [N-Term]	1.80278e+07	4.71668e+07	9.46678e+07	9.01071e+07	9.30311e+07	8.40766e+07	4.63022e+07	4.91294e+07	9.01365e+07	1.80278e+07	4.33018e+07	6.38855e+07	4.91897e+07	3.83242e+07	3.58162e+07	2.62936e+07	2.67969e+07	4.18026e+07	3	3	3	3	3	3	3	3	3	High	High	High	High	High	High	High
AN10981-T-p1	transcript=AN10981-T | gene=AN10981 | organism=Aspergillus_nidulans_FGSC_A4 | gene_product=Putative bifunctional GTP cyclohydrolase II | transcript_product=Putative bifunctional GTP cyclohydrolase II | location=ChrIV_A_nidulans_FGSC_A4:2298200-2299796(+) | protein_length=494 | sequence_SO=chromosome | SO=protein_coding | is_pseudo=false	27	296	12	12	0	494	55	6.09	1538	19098.4	184.73	0	50.86		1.83746e+08	1.34233e+08	1.74953e+08	2.28677e+08	2.48558e+08	2.79658e+08	2.61618e+08	2.7152e+08	2.97164e+08	1.83746e+08	1.23234e+08	1.18065e+08	1.24835e+08	1.02393e+08	1.19133e+08	1.48565e+08	1.48096e+08	1.37816e+08	9	11	10	10	10	11	10	11	10	High	High	High	High	High	High	High
AN4401-T-p1	transcript=AN4401-T | gene=AN4401 | organism=Aspergillus_nidulans_FGSC_A4 | gene_product=Putative asparagine synthase with a predicted role in asparagine metabolism | transcript_product=Putative asparagine synthase with a predicted role in asparagine metabolism | location=ChrIII_A_nidulans_FGSC_A4:2151708-2153958(-) | protein_length=571 | sequence_SO=chromosome | SO=protein_coding | is_pseudo=fal…	18	295	9	9	0	571	64.3	6.01	1231	19735.9	178.55	0	44.328		1.52515e+07	1.6339e+07	9.79627e+06	3.67792e+07	2.87018e+07	5.76851e+07	1.79953e+07	2.4603e+07	2.27682e+07	1.52515e+07	1.50002e+07	6.6109e+06	2.00778e+07	1.18237e+07	2.45736e+07	1.0219e+07	1.34193e+07	1.05592e+07	6	8	8	5	5	6	6	8	8	High	High	High	High	High	High	High
AN2164-T-p1	transcript=AN2164-T | gene=AN2164 | organism=Aspergillus_nidulans_FGSC_A4 | gene_product=Ortholog(s) have cytosol, nuclear envelope localization | transcript_product=Ortholog(s) have cytosol, nuclear envelope localization | location=ChrVII_A_nidulans_FGSC_A4:3079559-3082663(+) | protein_length=1034 | sequence_SO=chromosome | SO=protein_coding | is_pseudo=false	15	295	12	12	0	1034	113.5	4.68	1683	22969.3	228.08	0	68.065		5.02732e+07	4.24001e+07	3.36889e+07	2.37691e+07	3.56096e+07	4.35745e+07	5.59093e+07	4.61683e+07	3.28939e+07	5.02732e+07	3.89257e+07	22734553	1.29756e+07	1.46694e+07	1.85625e+07	3.17492e+07	2.51818e+07	1.52552e+07	9	8	7	7	6	8	7	7	6	High	High	High	High	High	High	High
AN1923-T-p1	transcript=AN1923-T | gene=AN1923 | organism=Aspergillus_nidulans_FGSC_A4 | gene_product=Putative alanine transaminase with a predicted role in alanine and aspartate metabolism | transcript_product=Putative alanine transaminase with a predicted role in alanine and aspartate metabolism | location=ChrVII_A_nidulans_FGSC_A4:2270072-2272089(+) | protein_length=555 | sequence_SO=chromosome | SO=protei…	19	295	9	9	0	555	61	7.4	2631	23908.6	254.31	0	55.318		9.13505e+07	8.24236e+07	5.73557e+07	5.82294e+07	7.96367e+07	7.91022e+07	1.31047e+08	3.73849e+07	5.73624e+07	9.13505e+07	7.56696e+07	3.87058e+07	3.17876e+07	3.28063e+07	3.36971e+07	7.44174e+07	2.0391e+07	2.66029e+07	7	7	3	7	6	7	6	4	7	High	High	High	High	High	High	High
AN10873-T-p1	transcript=AN10873-T | gene=AN10873 | organism=Aspergillus_nidulans_FGSC_A4 | gene_product=Ortholog(s) have role in protein import into mitochondrial outer membrane and mitochondrial outer membrane localization | transcript_product=Ortholog(s) have role in protein import into mitochondrial outer membrane and mitochondrial outer membrane localization | location=ChrIV_A_nidulans_FGSC_A4:1380050-138…	27	294	11	11	0	516	56.3	9.23	2886	23483.4	213.89	0	66.79		1.90052e+07	1.75986e+07	3.19107e+07	5.80369e+07	7.4707e+07	6.72091e+07	4.49518e+07	5.08432e+07	5.3491e+07	1.90052e+07	1.61565e+07	2.15346e+07	3.16825e+07	3.07755e+07	2.86307e+07	2.55268e+07	2.77317e+07	2.48075e+07	9	9	8	11	10	10	9	9	10	High	High	High	High	High	High	High
AN6337-T-p1	transcript=AN6337-T | gene=AN6337 | organism=Aspergillus_nidulans_FGSC_A4 | gene_product=Ortholog(s) have intracellular localization | transcript_product=Ortholog(s) have intracellular localization | location=ChrI_A_nidulans_FGSC_A4:485775-486165(+) | protein_length=70 | sequence_SO=chromosome | SO=protein_coding | is_pseudo=false	26	294	3	3	0	70	8	5.4	1237	14935	110.5	0	12.833		2.88277e+08	6.31952e+07	1.94657e+07	1.15972e+08	1.21736e+08	1.30037e+08	1.22028e+08	3.18583e+07	2.52964e+07	2.88277e+08	5.80168e+07	1.31362e+07	6.33093e+07	5.01491e+07	5.53949e+07	6.92957e+07	1.73766e+07	1.17317e+07	2	3	3	3	3	3	3	3	3	High	High	High	High	High	High	High
AN4550-T-p1	transcript=AN4550-T | gene=AN4550 | organism=Aspergillus_nidulans_FGSC_A4 | gene_product=Putative asparaginyl-tRNA synthetase with a predicted role in tRNA charging for translation | transcript_product=Putative asparaginyl-tRNA synthetase with a predicted role in tRNA charging for translation | location=ChrIII_A_nidulans_FGSC_A4:1685507-1687233(-) | protein_length=555 | sequence_SO=chromosome | S…	22	294	10	10	0	555	61.5	6.35	2251	24527.8	183.1	0	50.446	Acetyl [N-Term]	3.22871e+07	6.60296e+07	1.08444e+08	7.41636e+07	8.56246e+07	7.78208e+07	9.40329e+07	8.17022e+07	1.20763e+08	3.22871e+07	6.06189e+07	7.31821e+07	4.04861e+07	3.5273e+07	3.31513e+07	5.33984e+07	4.45632e+07	5.60063e+07	6	8	7	8	7	6	7	8	7	High	High	High	High	High	High	High
AN5784-T-p1	transcript=AN5784-T | gene=AN5784 | organism=Aspergillus_nidulans_FGSC_A4 | gene_product=Ortholog(s) have role in proteasomal ubiquitin-independent protein catabolic process, proteasome-mediated ubiquitin-dependent protein catabolic process and cytosol, nucleus, proteasome core complex, beta-subunit complex localization | transcript_product=Ortholog(s) have role in proteasomal ubiquitin-independe…	32	294	7	7	0	261	28.6	6.43	1699	21907	233.83	0	47.485		6.57567e+07	4.95295e+07	5.89832e+07	3.70984e+07	8.0406e+07	5.42712e+07	5.18123e+07	4.1119e+07	5.44851e+07	6.57567e+07	4.54709e+07	3.98041e+07	2.02521e+07	3.31232e+07	2.31192e+07	2.94226e+07	2.24278e+07	2.52685e+07	7	6	6	7	7	6	6	6	6	High	High	High	High	High	High	High
AN1358-T-p1	transcript=AN1358-T | gene=AN1358 | organism=Aspergillus_nidulans_FGSC_A4 | gene_product=Ortholog(s) have protein serine/threonine phosphatase activity | transcript_product=Ortholog(s) have protein serine/threonine phosphatase activity | location=ChrVIII_A_nidulans_FGSC_A4:747414-749426(+) | protein_length=420 | sequence_SO=chromosome | SO=protein_coding | is_pseudo=false	29	294	9	9	0	420	45.9	4.7	923	17601.1	144.39	0	68.918		6.45566e+07	3.6875e+07	2.0994e+07	2.55679e+07	2.31425e+07	2.03306e+07	2.54151e+07	2.82033e+07	8.02372e+07	6.45566e+07	3.38534e+07	1.41676e+07	1.39576e+07	9.53355e+06	8.66074e+06	1.44325e+07	1.53831e+07	3.72115e+07	9	8	7	5	7	7	7	7	7	High	High	High	High	High	High	High
AN0271-T-p1	transcript=AN0271-T | gene=AN0271 | organism=Aspergillus_nidulans_FGSC_A4 | gene_product=Putative dUTP pyrophosphatase with a predicted role in pyrimidine metabolism | transcript_product=Putative dUTP pyrophosphatase with a predicted role in pyrimidine metabolism | location=ChrVIII_A_nidulans_FGSC_A4:4089888-4090782(+) | protein_length=257 | sequence_SO=chromosome | SO=protein_coding | is_pseudo=…	28	293	5	5	0	257	27.2	8.95	3059	30146.5	328.69	0	47.979		3.53876e+07	1.81299e+07	2.64695e+07	1.96804e+07	1.98113e+07	2.86076e+07	4.02895e+07	3.2404e+07	4.00962e+07	3.53876e+07	1.66443e+07	1.78626e+07	1.07436e+07	8.16127e+06	1.21867e+07	2.28792e+07	1.76743e+07	1.85954e+07	4	5	5	5	5	4	5	5	5	High	High	High	High	High	High	High
AN0224-T-p1	transcript=AN0224-T | gene=AN0224 | organism=Aspergillus_nidulans_FGSC_A4 | gene_product=Ortholog(s) have Golgi apparatus, cytosol, nucleus localization | transcript_product=Ortholog(s) have Golgi apparatus, cytosol, nucleus localization | location=ChrVIII_A_nidulans_FGSC_A4:4235872-4237236(+) | protein_length=415 | sequence_SO=chromosome | SO=protein_coding | is_pseudo=false	24	293	8	8	0	415	46.1	5.43	1787	22277.4	234.98	0	65.808		4.75446e+07	6.23229e+07	7.71736e+07	5.69625e+07	7.86887e+07	9.11535e+07	8.04413e+07	8.43702e+07	9.86064e+07	4.75446e+07	5.7216e+07	5.20797e+07	3.1096e+07	3.24158e+07	3.88309e+07	4.56802e+07	4.60184e+07	4.57306e+07	7	6	7	7	6	7	7	6	6	High	High	High	High	High	High	High
AN4259-T-p1	transcript=AN4259-T | gene=AN4259 | organism=Aspergillus_nidulans_FGSC_A4 | gene_product=Ortholog(s) have role in cytoplasmic translational initiation and cytosol, eukaryotic 43S preinitiation complex, eukaryotic translation initiation factor 3 complex, nucleus localization | transcript_product=Ortholog(s) have role in cytoplasmic translational initiation and cytosol, eukaryotic 43S preinitiation…	30	292	10	10	0	459	49.8	4.97	2988	25468.5	262.06	0	52.826		9.05651e+07	6.73711e+07	5.81086e+07	7.62474e+07	8.84698e+07	8.4951e+07	6.95175e+07	4.63822e+07	1.11544e+08	9.05651e+07	6.18505e+07	3.92139e+07	4.16236e+07	3.64451e+07	3.61887e+07	3.94769e+07	2.52985e+07	5.17305e+07	7	7	6	9	7	6	7	6	7	High	High	High	High	High	High	High
AN6632-T-p1	transcript=AN6632-T | gene=AN6632 | organism=Aspergillus_nidulans_FGSC_A4 | gene_product=Putative 40S ribosomal protein S28 | transcript_product=Putative 40S ribosomal protein S28 | location=ChrI_A_nidulans_FGSC_A4:2682379-2682867(+) | protein_length=68 | sequence_SO=chromosome | SO=protein_coding | is_pseudo=false	31	291	2	2	0	68	7.7	10.76	3082	21689.5	205.56	0	17.167		1.53028e+08	7.14128e+07	1.09984e+08	9.18638e+07	9.21423e+07	7.82212e+07	8.69522e+07	7.64223e+07	1.32637e+08	1.53028e+08	6.5561e+07	7.42212e+07	5.01487e+07	3.7958e+07	3.33218e+07	4.93775e+07	4.16834e+07	6.15128e+07	3	2	2	3	3	3	3	3	3	High	High	High	High	High	High	High
AN9090-T-p1	transcript=AN9090-T | gene=AN9090 | organism=Aspergillus_nidulans_FGSC_A4 | gene_product=RNA binding protein involved in regulation of arginine catabolism | transcript_product=RNA binding protein involved in regulation of arginine catabolism | location=ChrVI_A_nidulans_FGSC_A4:465056-466447(+) | protein_length=393 | sequence_SO=chromosome | SO=protein_coding | is_pseudo=false	31	291	8	8	0	393	42.3	7.3	824	19467	183.07	0	52.032		4.48821e+07	2.54694e+07	1.77149e+07	1.02884e+08	1.0377e+08	1.07994e+08	1.50708e+08	2.96574e+07	2.83749e+07	4.48821e+07	2.33824e+07	1.19547e+07	5.61649e+07	4.27481e+07	4.60049e+07	8.55826e+07	1.61762e+07	1.31594e+07	6	5	5	8	6	7	6	8	6	High	High	High	High	High	High	High
AN6738-T-p1	transcript=AN6738-T | gene=AN6738 | organism=Aspergillus_nidulans_FGSC_A4 | gene_product=Putative nuclear pore complex protein | transcript_product=Putative nuclear pore complex protein | location=ChrI_A_nidulans_FGSC_A4:3022535-3026801(+) | protein_length=1346 | sequence_SO=chromosome | SO=protein_coding | is_pseudo=false	17	291	17	17	0	1346	148.6	5.76	1754	20811.5	193.91	0	97.314		2.14341e+07	2.2424e+07	2.72827e+07	4.37751e+07	4.77981e+07	2.65138e+07	4.32678e+07	3.11139e+07	4.13959e+07	2.14341e+07	2.05865e+07	1.84114e+07	2.3897e+07	1.96904e+07	1.12947e+07	2.45705e+07	1.69706e+07	1.91982e+07	7	9	11	8	8	7	10	9	11	High	High	High	High	High	High	High
AN8004-T-p1	transcript=AN8004-T | gene=AN8004 | organism=Aspergillus_nidulans_FGSC_A4 | gene_product=Putative cytochrome P450 | transcript_product=Putative cytochrome P450 | location=ChrII_A_nidulans_FGSC_A4:475134-476543(+) | protein_length=469 | sequence_SO=chromosome | SO=protein_coding | is_pseudo=false	22	290	14	14	0	469	52.1	6.92	1262	16579.1	143.57	0	66.547		8.40721e+07	1.76993e+08	1.46385e+08	1.35646e+08	1.75262e+08	1.16759e+08	1.18047e+08	1.15476e+08	1.06225e+08	8.40721e+07	1.6249e+08	9.87863e+07	7.40498e+07	7.2199e+07	4.97387e+07	6.70353e+07	6.29846e+07	4.92641e+07	10	10	11	11	12	11	10	11	8	High	High	High	High	High	High	High
AN3804-T-p1	transcript=AN3804-T | gene=AN3804 | organism=Aspergillus_nidulans_FGSC_A4 | gene_product=Ortholog(s) have IgE binding activity | transcript_product=Ortholog(s) have IgE binding activity | location=ChrII_A_nidulans_FGSC_A4:2997125-2998087(+) | protein_length=320 | sequence_SO=chromosome | SO=protein_coding | is_pseudo=false	26	290	6	6	0	320	33.7	4.77	3016	24800	232.6	0	40.572		1.05408e+08	1.52675e+08	9.27212e+07	9.65534e+07	6.22606e+07	8.46822e+07	5.52713e+07	6.55838e+07	7.23739e+07	1.05408e+08	1.40164e+08	6.25718e+07	5.27088e+07	2.56482e+07	3.60742e+07	3.13869e+07	3.57717e+07	3.35648e+07	6	5	4	6	6	6	5	5	4	High	High	High	High	High	High	High
AN0285-T-p1	transcript=AN0285-T | gene=AN0285 | organism=Aspergillus_nidulans_FGSC_A4 | gene_product=Putative 6-phosphogluconolactonase with a predicted role in gluconic acid and gluconate metabolism | transcript_product=Putative 6-phosphogluconolactonase with a predicted role in gluconic acid and gluconate metabolism | location=ChrVIII_A_nidulans_FGSC_A4:4026085-4026882(+) | protein_length=265 | sequence_SO…	32	289	6	6	0	265	28.7	5.8	2759	21446	234.81	0	43.79		6.6603e+07	3.71121e+07	1.45347e+07	4.15616e+07	7.73751e+07	5.14339e+07	2.9724e+07	3.0906e+07	3.24673e+07	6.6603e+07	3.4071e+07	9.80857e+06	2.26886e+07	3.18747e+07	2.19106e+07	1.68794e+07	1.68572e+07	1.50573e+07	5	5	3	5	4	4	5	5	4	High	High	High	High	High	High	High
AN1429-T-p1	transcript=AN1429-T | gene=AN1429 | organism=Aspergillus_nidulans_FGSC_A4 | gene_product=Putative choline oxidase | transcript_product=Putative choline oxidase | location=ChrVII_A_nidulans_FGSC_A4:755022-756702(-) | protein_length=542 | sequence_SO=chromosome | SO=protein_coding | is_pseudo=false	21	289	10	10	0	542	60	6.76	2426	22598.2	238.83	0	65.87		6.5315e+07	2.39638e+07	3.65732e+07	5.74531e+07	7.60106e+07	8.51608e+07	4.63583e+07	5.72097e+07	1.04883e+08	6.5315e+07	2.20001e+07	2.4681e+07	3.13638e+07	3.13125e+07	3.62781e+07	2.63254e+07	3.12042e+07	4.86415e+07	8	9	9	9	9	9	9	9	9	High	High	High	High	High	High	High
AN5134-T-p1	transcript=AN5134-T | gene=AN5134 | organism=Aspergillus_nidulans_FGSC_A4 | gene_product=Glutamate synthase, NAD(+)-dependent (GOGAT) with a predicted role in glutamate and glutamine metabolism | transcript_product=Glutamate synthase, NAD(+)-dependent (GOGAT) with a predicted role in glutamate and glutamine metabolism | location=ChrV_A_nidulans_FGSC_A4:1249552-1256169(+) | protein_length=2126 | s…	13	289	23	23	0	2126	234.1	6.33	1944	20405	179.44	0	113.204		4.618e+07	6.4343e+07	6.70917e+07	4.94234e+07	2.99734e+07	5.05763e+07	3.09023e+07	5.95501e+07	5.20127e+07	4.618e+07	5.90706e+07	4.52761e+07	2.69803e+07	1.23475e+07	2.15452e+07	1.75485e+07	3.24807e+07	2.41219e+07	12	12	14	14	11	12	14	10	10	High	High	High	High	High	High	High
AN10164-T-p1	transcript=AN10164-T | gene=AN10164 | organism=Aspergillus_nidulans_FGSC_A4 | gene_product=Ortholog(s) have mRNA binding, poly(U) RNA binding activity and role in nuclear-transcribed mRNA catabolic process, nonsense-mediated decay, regulation of mRNA stability, stress granule assembly | transcript_product=Ortholog(s) have mRNA binding, poly(U) RNA binding activity and role in nuclear-transcribed …	15	289	6	6	0	478	51.8	7.33	2636	22093.2	229	0	28.02		8.19784e+07	6.03377e+07	5.3944e+07	5.69672e+07	5.35445e+07	3.46811e+07	2.00457e+07	2.14126e+07	2.05121e+07	8.19784e+07	5.53934e+07	3.64035e+07	3.10986e+07	2.20576e+07	1.4774e+07	1.13833e+07	1.16792e+07	9.51287e+06	4	5	4	3	3	4	3	4	4	High	High	High	High	High	High	High
AN2210-T-p1	transcript=AN2210-T | gene=AN2210 | organism=Aspergillus_nidulans_FGSC_A4 | gene_product=Probable ABC-transporter | transcript_product=Probable ABC-transporter | location=ChrVII_A_nidulans_FGSC_A4:3210279-3212159(+) | protein_length=610 | sequence_SO=chromosome | SO=protein_coding | is_pseudo=false	17	289	10	10	0	610	68.2	6.89	3909	22723.8	267.2	0	47.32		5.75571e+07	5.08514e+07	4.85637e+07	4.1372e+07	2.83821e+07	2.43798e+07	4.55954e+07	2.59488e+07	7.03374e+07	5.75571e+07	4.66845e+07	3.27727e+07	2.25851e+07	1.1692e+07	1.03857e+07	2.58922e+07	1.41534e+07	3.26203e+07	9	8	8	8	8	7	7	5	8	High	High	High	High	High	High	High
[truncated: 2,529 more rows]
[truncated: 2 more columns]

## Sheet: 2-Pep_3Repl
Accession	Description	Coverage [%]	# PSMs	# Peptides	# Unique Peptides	# Razor Peptides	# AAs	MW [kDa]	calc. pI	Score Mascot: Mascot	Score MS Amanda 2.0: MS Amanda 2.0	Score Sequest HT: Sequest HT	Exp. q-value: Combined	Sum PEP Score	Modifications	Abundances (Normalized): F1: Sample	Abundances (Normalized): F2: Sample	Abundances (Normalized): F3: Sample	Abundances (Normalized): F4: Sample	Abundances (Normalized): F5: Sample	Abundances (Normalized): F6: Sample	Abundances (Normalized): F7: Sample	Abundances (Normalized): F8: Sample	Abundances (Normalized): F9: Sample	Abundance: F1: Sample	Abundance: F2: Sample	Abundance: F3: Sample	Abundance: F4: Sample	Abundance: F5: Sample	Abundance: F6: Sample	Abundance: F7: Sample	Abundance: F8: Sample	Abundance: F9: Sample	Abundances Count: F1: Sample	Abundances Count: F2: Sample	Abundances Count: F3: Sample	Abundances Count: F4: Sample	Abundances Count: F5: Sample	Abundances Count: F6: Sample	Abundances Count: F7: Sample	Abundances Count: F8: Sample	Abundances Count: F9: Sample	Found in Sample: [S1] F1: Sample	Found in Sample: [S2] F2: Sample	Found in Sample: [S3] F3: Sample	Found in Sample: [S4] F4: Sample	Found in Sample: [S5] F5: Sample	Found in Sample: [S6] F6: Sample	Found in Sample: [S7] F7: Sample
[truncated: 23,283 more rows]
[truncated: 22 more columns]
