# Supplementary material for: Targeted induction of a silent fungal gene cluster encoding the bacteria-specific germination inhibitor fumigermin
Source: eLife. 2020 Feb 21;9:e52541. doi: 10.7554/eLife.52541 (PMC7034978; doi:10.7554/eLife.52541)
Supplement: Figure 3—source data 1. [file elife-52541-fig3-data1.xlsx]

## Sheet: T0 0h
Application: Tecan i-control				Tecan i-control , 1.8.50.0
Device: infinite 200Pro				Serial number: 1110002606				Serial number of connected stacker:
Firmware: V_3.22_12/10_Infinite (Dec 14 2010/13.07.14)				MAI, V_3.22_12/10_Infinite (Dec 14 2010/13.07.14)
Date:	28.01.2019
Time:	18:02:24
System				A0494
User				A0494\MAM
Plate				NUNC 48 Flat Bottom Transparent PS Cat. No.: 150787/ 150687/ 152640 [NUN48ft.pdfx]
Plate-ID (Stacker)
Label: Label1
Mode				Absorbance
Wavelength				595	nm
Bandwidth				9	nm
Number of Flashes				25
Settle Time				0	ms
Start Time:	28.01.2019 18:02:24
	Temperature: 20.2 °C
<>	1	2	3	4	5	6	7	8
A	0.1826	0.1581	0.1928	0.1545	0.1133	0.2156	0.174	0.0814
B	0.1411	0.1573	0.1704	0.1111	0.1373	0.2217	0.1864	0.0799
C	0.1541	0.167	0.1264	0.11	0.1034	0.2459	0.2038	0.0824
D	0.1808	0.2086	0.1141	0.1104	0.1198	0.1768	0.1795	0.13
E	0.1599	0.1425	0.1516	0.1561	0.184	0.15	0.1973	0.0822
F	0.1106	0.1487	0.1506	0.111	0.1399	0.1313	0.1677	0.0797
End Time:	28.01.2019 18:03:06

## Sheet: T1 17h
Application: Tecan i-control				Tecan i-control , 1.8.50.0
Device: infinite 200Pro				Serial number: 1110002606				Serial number of connected stacker:
Firmware: V_3.22_12/10_Infinite (Dec 14 2010/13.07.14)				MAI, V_3.22_12/10_Infinite (Dec 14 2010/13.07.14)
Date:	29.01.2019
Time:	11:14:33
System				A0494
User				A0494\MAM
Plate				NUNC 48 Flat Bottom Transparent PS Cat. No.: 150787/ 150687/ 152640 [NUN48ft.pdfx]
Plate-ID (Stacker)
Label: Label1
Mode				Absorbance
Wavelength				595	nm
Bandwidth				9	nm
Number of Flashes				25
Settle Time				0	ms
Start Time:	29.01.2019 11:14:33
	Temperature: 19.9 °C
<>	1	2	3	4	5	6	7	8
A	0.1084	0.124	0.1139	0.1177	0.1055	0.1433	0.1295	0.0901
B	0.1199	0.2382	0.3618	0.3074	0.3397	0.359	0.3861	0.089
C	0.121	0.3031	0.3304	0.3172	0.3761	0.4211	0.3979	0.0972
D	0.1436	0.3457	0.3729	0.3738	0.3509	0.358	0.3674	0.0931
E	0.1306	0.3055	0.3629	0.3527	0.3504	0.3628	0.3083	0.0872
F	0.1211	0.1292	0.1282	0.1052	0.1182	0.1263	0.1155	0.0792
End Time:	29.01.2019 11:15:16

## Sheet: T2 24 
Application: Tecan i-control				Tecan i-control , 1.8.50.0
Device: infinite 200Pro				Serial number: 1110002606				Serial number of connected stacker:
Firmware: V_3.22_12/10_Infinite (Dec 14 2010/13.07.14)				MAI, V_3.22_12/10_Infinite (Dec 14 2010/13.07.14)
Date:	29.01.2019
Time:	18:21:25
System				A0494
User				A0494\MAM
Plate				NUNC 48 Flat Bottom Transparent PS Cat. No.: 150787/ 150687/ 152640 [NUN48ft.pdfx]
Plate-ID (Stacker)
Label: Label1
Mode				Absorbance
Wavelength				595	nm
Bandwidth				9	nm
Number of Flashes				25
Settle Time				0	ms
Start Time:	29.01.2019 18:21:26
	Temperature: 21.9 °C
<>	1	2	3	4	5	6	7	8
A	0.1384	0.1681	0.1603	0.1724	0.1569	0.1953	0.1675	0.1301
B	0.1691	0.1942	0.1949	0.1752	0.1754	0.2053	0.1717	0.1248
C	0.1805	0.2082	0.197	0.1745	0.1568	0.2066	0.1885	0.1413
D	0.2165	0.2324	0.2365	0.226	0.2163	0.2342	0.2159	0.1487
E	0.2077	0.2314	0.2273	0.2178	0.2426	0.2523	0.2421	0.1019
F	0.1222	0.1499	0.1694	0.1286	0.127	0.1286	0.1097	0.0823
End Time:	29.01.2019 18:22:09

## Sheet: T3 41h
Application: Tecan i-control				Tecan i-control , 1.8.50.0
Device: infinite 200Pro				Serial number: 1110002606				Serial number of connected stacker:
Firmware: V_3.22_12/10_Infinite (Dec 14 2010/13.07.14)				MAI, V_3.22_12/10_Infinite (Dec 14 2010/13.07.14)
Date:	30.01.2019
Time:	11:30:01
System				A0494
User				A0494\MAM
Plate				NUNC 48 Flat Bottom Transparent PS Cat. No.: 150787/ 150687/ 152640 [NUN48ft.pdfx]
Plate-ID (Stacker)
Label: Label1
Mode				Absorbance
Wavelength				595	nm
Bandwidth				9	nm
Number of Flashes				25
Settle Time				0	ms
Start Time:	30.01.2019 11:30:01
	Temperature: 20.4 °C
<>	1	2	3	4	5	6	7	8
A	0.1187	0.1383	0.1885	0.141	0.1492	0.164	0.28	0.1131
B	0.1423	0.1541	0.1501	0.1382	0.1367	0.1684	0.1359	0.1033
C	0.148	0.1598	0.1535	0.14	0.1402	0.1684	0.1583	0.1088
D	0.1793	0.1704	0.1728	0.1691	0.1585	0.1823	0.1722	0.1287
E	0.1669	0.176	0.1791	0.1641	0.1807	0.1927	0.2086	0.099
F	0.1366	0.1435	0.1527	0.1268	0.1411	0.1438	0.3003	0.0831
End Time:	30.01.2019 11:30:44

## Sheet: T4 48h 
Application: Tecan i-control				Tecan i-control , 1.8.50.0
Device: infinite 200Pro				Serial number: 1110002606				Serial number of connected stacker:
Firmware: V_3.22_12/10_Infinite (Dec 14 2010/13.07.14)				MAI, V_3.22_12/10_Infinite (Dec 14 2010/13.07.14)
Date:	30.01.2019
Time:	18:28:44
System				A0494
User				A0494\MAM
Plate				NUNC 48 Flat Bottom Transparent PS Cat. No.: 150787/ 150687/ 152640 [NUN48ft.pdfx]
Plate-ID (Stacker)
Label: Label1
Mode				Absorbance
Wavelength				595	nm
Bandwidth				9	nm
Number of Flashes				25
Settle Time				0	ms
Start Time:	30.01.2019 18:28:44
	Temperature: 23.5 °C
<>	1	2	3	4	5	6	7	8
A	0.121	0.1556	0.2176	0.1423	0.1762	0.1628	0.4114	0.1098
B	0.1452	0.1594	0.1575	0.1434	0.1454	0.1743	0.1685	0.1062
C	0.1496	0.1662	0.1664	0.1499	0.168	0.1974	0.2428	0.1238
D	0.1692	0.1819	0.1873	0.1778	0.1716	0.1955	0.2627	0.1204
E	0.1471	0.1659	0.1774	0.1787	0.1883	0.2017	0.2585	0.1202
F	0.1058	0.1302	0.1354	0.1093	0.1193	0.1203	0.4189	0.0843
End Time:	30.01.2019 18:29:26

## Sheet: T5 65h
Application: Tecan i-control				Tecan i-control , 1.8.50.0
Device: infinite 200Pro				Serial number: 1110002606				Serial number of connected stacker:
Firmware: V_3.22_12/10_Infinite (Dec 14 2010/13.07.14)				MAI, V_3.22_12/10_Infinite (Dec 14 2010/13.07.14)
Date:	31.01.2019
Time:	11:45:54
System				A0494
User				A0494\MAM
Plate				NUNC 48 Flat Bottom Transparent PS Cat. No.: 150787/ 150687/ 152640 [NUN48ft.pdfx]
Plate-ID (Stacker)
Label: Label1
Mode				Absorbance
Wavelength				595	nm
Bandwidth				9	nm
Number of Flashes				25
Settle Time				0	ms
Start Time:	31.01.2019 11:45:54
	Temperature: 20.1 °C
<>	1	2	3	4	5	6	7	8
A	0.0973	0.1315	0.2103	0.1322	0.6105	0.1595	0.8905	0.0894
B	0.1342	0.1617	0.1618	0.1412	0.1615	0.1683	0.6681	0.0958
C	0.1381	0.165	0.1585	0.1444	0.3573	0.1902	0.5117	0.1167
D	0.1529	0.1806	0.1803	0.172	0.1665	0.1838	0.488	0.1204
E	0.1695	0.2394	0.1812	0.2335	0.1773	0.1878	0.5895	0.097
F	0.1216	0.257	0.1452	0.1401	0.1317	0.1261	0.3164	0.0854
End Time:	31.01.2019 11:47:37

## Sheet: T6 72h 
Application: Tecan i-control				Tecan i-control , 1.8.50.0
Device: infinite 200Pro				Serial number: 1110002606				Serial number of connected stacker:
Firmware: V_3.22_12/10_Infinite (Dec 14 2010/13.07.14)				MAI, V_3.22_12/10_Infinite (Dec 14 2010/13.07.14)
Date:	31.01.2019
Time:	18:08:14
System				A0494
User				A0494\MAM
Plate				NUNC 48 Flat Bottom Transparent PS Cat. No.: 150787/ 150687/ 152640 [NUN48ft.pdfx]
Plate-ID (Stacker)
Label: Label1
Mode				Absorbance
Wavelength				595	nm
Bandwidth				9	nm
Number of Flashes				25
Settle Time				0	ms
Start Time:	31.01.2019 18:08:14
	Temperature: 22.4 °C
<>	1	2	3	4	5	6	7	8
A	0.0947	0.1436	0.4521	0.1515	0.5004	0.1757	0.2862	0.1152
B	0.1461	0.1792	0.175	0.1561	0.1587	0.1835	0.4148	0.1257
C	0.1518	0.1786	0.1705	0.1591	0.1836	0.2044	0.4654	0.1334
D	0.1725	0.1956	0.1944	0.1862	0.1879	0.201	0.3092	0.126
E	0.2017	0.2634	0.1858	0.2451	0.1887	0.2003	0.5321	0.0982
F	0.1188	0.1482	0.1429	0.1385	0.1173	0.1102	0.3862	0.0833
End Time:	31.01.2019 18:08:57

## Sheet: T7 90h
Application: Tecan i-control				Tecan i-control , 1.8.50.0
Device: infinite 200Pro				Serial number: 1110002606				Serial number of connected stacker:
Firmware: V_3.22_12/10_Infinite (Dec 14 2010/13.07.14)				MAI, V_3.22_12/10_Infinite (Dec 14 2010/13.07.14)
Date:	01.02.2019
Time:	11:31:05
System				A0494
User				A0494\MAM
Plate				NUNC 48 Flat Bottom Transparent PS Cat. No.: 150787/ 150687/ 152640 [NUN48ft.pdfx]
Plate-ID (Stacker)
Label: Label1
Mode				Absorbance
Wavelength				595	nm
Bandwidth				9	nm
Number of Flashes				25
Settle Time				0	ms
Start Time:	01.02.2019 11:31:05
	Temperature: 20.5 °C
<>	1	2	3	4	5	6	7	8
A	0.0996	0.1298	0.1315	0.1914	0.3501	0.1604	0.1961	0.0935
B	0.1345	0.1677	0.2147	0.1708	0.1836	0.1754	0.2494	0.1151
C	0.146	0.2658	0.1889	0.1858	0.3468	0.1944	0.3616	0.14
D	0.1654	0.1946	0.1921	0.1934	0.2063	0.1953	0.3542	0.1344
E	0.1252	0.1888	0.1977	0.38	0.1855	0.1941	0.4085	0.0983
F	0.0997	0.2253	0.1443	0.2492	0.116	0.1114	0.2601	0.0851
End Time:	01.02.2019 11:31:49

## Sheet: Tabelle1
	S. rapamicynicus + germicidin	S. rapamicynicus + germicidin	S. rapamicynicus + germicidin	S. rapa + fumigermin	S. rapa + fumigermin	S. rapa + fumigermin	S. rapa	S. rapa	S. rapa	S. rapa + MeOH	S. rapa + MeOH	S. rapa + MeOH
time	mean	SEM	N	mean	SEM	N	mean	SEM	N	mean	SEM	N
0	0.148017	0.019634	9	0.135067	0.0179121	9	0.157433	0.0267223	9	0.162522	0.0260268	9
24	0.1851	0.0257205	9	0.186144	0.0182324	9	0.180144	0.00872838	9	0.189222	0.0248148	9
41	0.151517	0.0148894	9	0.155011	0.0129153	9	0.177622	0.0355122	9	0.168944	0.0182493	9
48	0.144583	0.0236353	9	0.153056	0.0155262	9	0.212978	0.0715163	9	0.204211	0.0499351	9
65	0.14655	0.0226124	9	0.152233	0.0112833	9	0.300922	0.116014	9	0.354378	0.0709209	9
72	0.15195	0.0253427	9	0.161611	0.0102825	9	0.281444	0.0962755	9	0.298667	0.0720161	9
89	0.152767	0.0300197	9	0.160889	0.0212282	9	0.259	0.0621444	9	0.270622	0.044935	9

## Sheet: Reversibility
S.r.	S.r. + fumigermin	S.r. washed
0.212978	0.105011	0.209772
0.300922	0.103056	0.198679
0.271444	0.102233	0.196378
S.r.	S.r. + fumigermin	S.r. washed
0.261781	0.103433	0.20161
0.0365476	0.00116506	0.0058477
